1 **Optimised DNA extraction and library preparation for minute arthropods: application**  
2 **to target enrichment in chalcid wasps used for biocontrol.**

3

4 Astrid Cruaud<sup>1\*</sup>, Sabine Nidelet<sup>1</sup>, Pierre Arnal<sup>1,2</sup>, Audrey Weber<sup>3</sup>, Lucian Fusu<sup>4</sup>, Alex  
5 Gumovsky<sup>5</sup>, John Huber<sup>6</sup>, Andrew Polaszek<sup>7</sup> and Jean-Yves Rasplus<sup>1</sup>

6

7 <sup>1</sup> CBGP, INRA, CIRAD, IRD, Montpellier SupAgro, Univ Montpellier, Montpellier, France

8 <sup>2</sup> ISYEB–UMR 7205 MNHN, CNRS, UPMC, EPHE, Sorbonne Universités, Paris, France

9 <sup>3</sup> AGAP, INRA, CIRAD, Montpellier SupAgro, Univ Montpellier, Montpellier, France.

10 <sup>4</sup> Faculty of Biology, Alexandru Ioan Cuza University, Iasi, Romania

11 <sup>5</sup> Schmalhausen Institute of Zoology, National Academy of Sciences of Ukraine, Kiev,

12 Ukraine

13 <sup>6</sup> Natural Resources Canada, c/o Canadian National Collection of Insects, Ottawa, Canada

14 <sup>7</sup> Department of Life Sciences, Natural History Museum, London, UK

15

16 \*corresponding author: [astrid.cruaud@inra.fr](mailto:astrid.cruaud@inra.fr)

17

18 running headline = target-enrichment in minute wasps

19

20 **Abstract**

21 Enriching subsets of the genome prior to sequencing allows focusing effort on regions that are

22 relevant to answer specific questions. As experimental design can be adapted to sequence

23 many samples simultaneously, using such approach also contributes to reduce cost. In the

24 field of ecology and evolution, target enrichment is increasingly used for genotyping of plant

25 and animal species or to better understand the evolutionary history of important lineages

26 through the inference of statistically robust phylogenies. Limitations to routine target  
27 enrichment by research laboratories are both the complexity of current protocols and low  
28 input DNA quantity. Thus, working with tiny organisms such as micro-arthropods can be  
29 challenging. Here, we propose easy to set up optimisations for DNA extraction and library  
30 preparation prior to target enrichment. Prepared libraries were used to capture 1432 Ultra-  
31 Conserved Elements (UCEs) from microhymenoptera (Chalcidoidea), which are among the  
32 tiniest insects on Earth and the most commercialized worldwide for biological control  
33 purposes. Results show no correlation between input DNA quantities (1.8-250ng, 0.4 ng with  
34 an extra whole genome amplification step) and the number of sequenced UCEs. Phylogenetic  
35 inferences highlight the potential of UCEs to solve relationships within the families of chalcid  
36 wasps, which has not been achieved so far. The protocol (library preparation + target  
37 enrichment), allows processing 96 specimens in five working days, by a single person,  
38 without requiring the use of expensive robotic molecular biology platforms, which could help  
39 to generalize the use of target enrichment for minute specimens.

40

41

42 **Key words** : Chalcidoidea, library construction, low DNA quantity, micro-arthropods, target  
43 enrichment, UCEs.

44

## 45 INTRODUCTION

46 Enriching subsets of the genome prior to sequencing (target enrichment, Mamanova *et al.*  
47 2010) allows effort to be concentrated on genomic regions that are relevant to answer specific  
48 research questions. Using this approach also contributes to reducing cost, as experimental  
49 design can be adapted to sequence many samples simultaneously. In the fields of ecology and  
50 evolution, target enrichment has been used for genotyping or phylogenomics of plant and  
51 animal species (Gasc *et al.* 2016; Lemmon & Lemmon 2013), to characterize phenotypic  
52 traits (e.g., Muraya *et al.* 2015) or to explore microbial ecosystems (Gasc & Peyret 2018).  
53  
54 However, routine target enrichment by research laboratories is limited both by the complexity  
55 of current protocols, and by input DNA quantity that may be very low for some minute  
56 species (e.g. micro-arthropods < 1mm) and /or old /rare (museum) specimens. Indeed, current  
57 protocols (DNA extraction, library preparation, target-enrichment) are time consuming and  
58 require handling expertise. They have been initially developed to work with large amounts of  
59 input DNA (e.g., vertebrates or large/medium size insects; Faircloth *et al.* 2015; McCormack  
60 *et al.* 2013) and include many purification steps that increase DNA loss. Working on hyper-  
61 diverse groups of microarthropods is challenging, as it requires one to perform the extraction  
62 on i) a large number of specimens/species to be representative of the overall diversity of the  
63 group, without the possibility of using pipetting robots that increase DNA loss, ii) single  
64 individuals because species complexes are frequent (Al Khatib *et al.* 2014; Kenyon *et al.*  
65 2015; Mottern & Heraty 2014), iii) the whole insect without destruction for vouchering and  
66 often prior to species identification, iv) rare species that have been collected once and may be  
67 represented in collection by a few specimens or only one specimen and, sometimes, v) old  
68 and dry museum specimens used for species description (types).

69

70 In this study, we propose optimised protocols for DNA extraction and library preparation for  
71 target enrichment purposes, as well as a custom pipeline to analyse the sequence data  
72 obtained. We used these protocols and customised pipeline to capture and analyse Ultra  
73 Conserved Elements (UCEs) in minute wasps, the chalcids (Insecta: Hymenoptera:  
74 Chalcidoidea, Heraty *et al.* 2013; Noyes 2018), that are key components of terrestrial  
75 ecosystems. Chalcids are key models for basic and applied research. With an estimated  
76 diversity of more than 500,000 species these microhymenoptera have colonised almost all  
77 extant terrestrial habitats. Many of them develop as parasitoids of arthropod eggs, larvae or  
78 pupae. As such, they are both key regulators of the populations of many other arthropod  
79 species in natural ecosystems and are increasingly used worldwide as biocontrol agents (e.g.,  
80 Consoli *et al.* 2010; Heraty 2009). A few of them, especially *Nasonia* (Pteromalidae) or  
81 *Trichogramma* (Trichogrammatidae) species are also used as model systems to answer  
82 challenging questions about sex determination, genetics of speciation, host-symbiont  
83 interactions or behavioural ecology (e.g., Pinto *et al.* 1991; Stouthamer *et al.* 1990; Werren &  
84 Loehlin 2009). Chalcidoidea has undergone a spectacular radiation resulting in a huge  
85 diversity of morphologies and sizes (Gibson *et al.* 1999; Heraty *et al.* 2013), but are generally  
86 small insects (< 2 mm long). Among them, *Kikiki huna* Huber (Mymaridae) at 158 µm long is  
87 the smallest winged insect currently known and the wingless male of *Dicopomorpha*  
88 *echmepterygis* Mockford at 139 µm is the smallest insect currently known (Huber & Noyes  
89 2013). Notably, most species used for biological control, belonging mainly to five families  
90 (Aphelinidae, Encyrtidae, Eulophidae, Mymaridae and Trichogrammatidae) are among the  
91 tiniest wasps on earth (< 1mm).

92

93 Their small size, huge diversity and widespread morphological convergence make chalcid  
94 wasps difficult to identify to species by non-expert taxonomists, which limits their use in



95 biological control. Attempts have been made to resolve the phylogeny of the whole  
96 superfamily (Heraty *et al.* 2013; Munro *et al.* 2011) or a few families (Burks *et al.* 2011;  
97 Chen *et al.* 2004; Cruaud *et al.* 2012; Desjardins *et al.* 2007; Janšta *et al.* 2017; Owen *et al.*  
98 2007) but none has succeeded. Indeed, the few markers that could be targeted with Sanger  
99 sequencing were not informative enough to solve deeper relationships. A study based on  
100 transcriptome data (3,239 single-copy genes) obtained from 37 species of chalcids and 11  
101 outgroups also failed to solve relationships within the superfamily (Peters *et al.* 2018). As  
102 only a representative sampling in both markers and taxa will allow one to draw accurate  
103 conclusions on the history of this hyperdiverse group, target enrichment approaches appear  
104 relevant. More specifically, targeting UCEs and their flanking regions that have been proven  
105 useful to solve ancient and recent divergences (Faircloth *et al.* 2012; Smith *et al.* 2014) seems  
106 pertinent. Indeed, a set of probes has been developed to target UCEs in Hymenoptera  
107 (Faircloth *et al.* 2015). This set and an enriched one (Branstetter *et al.* 2017c) were  
108 successfully used to solve the phylogeny of a few groups of ants, wasps and bees for which  
109 the amount of DNA was not limiting (Blaimer *et al.* 2015; Blaimer *et al.* 2016a; Blaimer *et al.*  
110 2016b; Bossert *et al.* 2017; Branstetter *et al.* 2017a; Branstetter *et al.* 2017b; Jesovnik *et al.*  
111 2017; Prebus 2017; Ward & Branstetter 2017). Thus, contributing to the global effort to solve  
112 the Hymenoptera tree of life while addressing the challenge of the phylogeny of chalcid  
113 wasps seemed sound.

114

115 Here, we provide a detailed description of the optimised protocol for DNA extraction and  
116 library preparation, followed by a description of the phylogenetic trees obtained through  
117 target enrichment of UCEs from 96 species belonging to seven families and one subfamily of  
118 chalcids used for biological control (Aphelinidae, Azotidae, Encyrtidae, Eulophidae,  
119 Mymaridae, Pteromalidae: Eunotinae, Signiphoridae, Trichogrammatidae) as well as three

120 outgroups in Mymaromatidae, the putative sister group to Chalcidoidea (Gibson *et al.* 2007;  
121 Heraty *et al.* 2013).

122

## 123 **MATERIALS AND METHODS**

124

### 125 **Sampling**

126 Samples were taken from the personal collections of the co-authors of this paper, or borrowed  
127 from the Queensland Museum (Australia) or the Australian National Insect Collection,  
128 Canberra. Details of the samples included in the analysis are presented in Table S1. Most  
129 specimens sampled in the field were placed directly into ethanol for storage. On average,  
130 specimens spent 3.5 years in ethanol before being processed (maximum storage time in  
131 alcohol = 34 years). Two specimens were critical point dried 25 or 34 years ago. UCE data for  
132 three specimens were retrieved from a previous study (Branstetter *et al.* 2017a): *Euplectrus*  
133 sp. (empirical data); *Copidosoma floridanum* and *Trichogramma pretiosum* (*in silico*  
134 extraction of UCEs from genomes).

135

### 136 **DNA extraction**

137 DNA was extracted using the Qiagen DNeasy Blood and Tissue kit. All extractions were  
138 conducted without destruction of the specimens' external (and certain internal) structures,  
139 with digestion and lysis of just the soft tissues. In this way, actual or potential type specimens  
140 are preserved. An often-essential feedback to the morphology is also preserved which is  
141 critical in this difficult group. The following modifications were made to manufacturer's  
142 protocol. Samples were incubated overnight in an Eppendorf thermomixer (temperature =  
143 56°C, mixing frequency = 300 rpm). To increase DNA yield, two successive elutions (50 µL  
144 each) were performed with heated buffer AE (56°C) and an incubation step of 15 minutes

145 followed by centrifugation (8000 rpm for 1 minutes at room temperature). Eppendorf  
146 microtubes LoBind 1,5ml were used for elution and to store DNA at -20°C until library  
147 preparation. DNA was quantified with a Qubit® 2.0 Fluorometer (Invitrogen). The final  
148 version of the DNA extraction protocol is available as an additional file 1. Vouchers were  
149 deposited at CBGP, Montferrier-sur-Lez, France or returned to their owner.

150

### 151 **Whole genome amplification**

152 DNA extracted from two specimens was subjected to ethanol precipitation and whole genome  
153 amplification (WGA) using the GenomiPhi™ V2 DNA Amplification kit (GE Healthcare) as  
154 described in Cruaud *et al.* (in press). 1µl of concentrated DNA was used as input (i.e. 4 ng or  
155 0.4 ng, Table S1).

156

### 157 **Library preparation.**

158 Our starting point was the protocol described in <http://ultraconserved.org> and Faircloth *et al.*  
159 (2015). The final goal was to obtain a standardized protocol that could be implemented by one  
160 person and which, in 5 working days, would made possible the manual preparation of  
161 libraries and the capture of UCEs from 96 samples in parallel. Steps by steps optimisations  
162 were made specially to remove time-consuming purification steps and different reagents were  
163 tested. The final version of the protocol is available as additional file 2. Briefly, input DNA  
164 was sheared to a size of ca 400 bp using the Bioruptor® Pico (Diagenode). End repair, 3'-end  
165 adenylation, adapters ligation and PCR enrichment were then performed with the NEBNext  
166 Ultra II DNA Library prep kit for Illumina (NEB). We used barcoded adapters that contained  
167 amplification and Illumina sequencing primer sites, as well as a nucleotide barcode of 5 or 6  
168 bp long for sample identification (additional file 3). Pools of 16 samples were made at  
169 equimolar ratio. We enriched each pool using the 2749 probes designed by Faircloth *et al.*

170 (2015) using MYbaits kits (MYcroarray, Inc.). We followed manufacturer's protocol  
171 (MYbaits, user manual version 3, <http://www.mycroarray.com/pdf/MYbaits-manual-v3.pdf>).  
172 The hybridization reaction was run for 24h at 65°C. Post enrichment amplification was  
173 performed on beads with the KAPA Hifi HotStart ReadyMix. The enriched libraries were  
174 quantified with Qubit, an Agilent Bioanalyzer and qPCR with the Library Quantification Kit -  
175 Illumina/Universal from KAPA (KK4824). They were then pooled at equimolar ratio. Paired-  
176 end sequencing (2\*300bp) was performed on an Illumina Miseq platform at UMR AGAP  
177 (Montpellier, France) to get longer flanking regions and, as a consequence, more information  
178 to differentiate closely related species.

179

## 180 **Raw data cleaning**

181 The analytical workflow is summarized in figure S1. In the next paragraph, chosen parameter  
182 values (different from default value) are provided between parentheses. Quality control  
183 checks were performed on raw sequence data with FastQC v.0.11.2 (Andrews 2010). Quality  
184 filtering and adapter trimming were performed with Trimmomatic-0.36 (Bolger *et al.* 2014)  
185 (LEADING:20 TRAILING:20 SLIDINGWINDOW:4:20 MINLEN:180, with PrefixPE/1=  
186 AATGATACGGCGACCACCGAGATCTACACTCTTTCCCTACACGACGCTCTTCCGA  
187 TCT and PrefixPE/2 =  
188 CAAGCAGAAGACGGCATAACGAGATCGGTCTCGGCATTCCTGCTGAACCGCTCTTC  
189 CGATCT). Overlapping reads were merged using FLASH-1.2.11 (-M 300) (Magoc &  
190 Salzberg 2011). Demultiplexing was performed using a bash custom script (no mismatch in  
191 barcode sequences was allowed, additional file 4). Assembly of cleaned reads was performed  
192 using CAP3 (-i 25 -o 25 -s 400) (Huang & Madan 1999). The 2749 probes designed by  
193 Faircloth *et al.* (2015) were assembled into non-overlapping UCEs (hereafter called reference  
194 UCEs, n=1432, additional files 5 and 6) using Geneious 8.1.8 (Kearse *et al.* 2012) and contigs

195 were aligned to this set of reference UCEs using LASTZ Release 1.02.00 (Harris 2007).  
196 Contigs that aligned with more than one reference UCE and different contigs that aligned with  
197 the same reference UCE were filtered out using Geneious 8.1.8.

198

## 199 **Data analysis**

200 UCEs for which sequences were available for more than 25% of the taxa were kept in the next  
201 steps of the analysis. Alignments were performed with MAFFT v7.245 (Katoh & Standley  
202 2013) (-linsi option). Ambiguously aligned blocks were removed using Gblock\_0.91b with  
203 relaxed constraints (-t=d -b2=b1 -b3=10 -b4=2 -b5=h) (Talavera & Castresana 2007). The  
204 final data set was analysed using supermatrix approaches and coalescent-based summary  
205 methods. Two gene tree reconciliation approaches were used: ASTRAL-III v5.6.1 (Zhang *et*  
206 *al.* 2018), which computes the phylogeny that agrees with the largest number of quartet trees  
207 induced by the set of input gene trees and ASTRID (Vachaspati & Warnow 2015) which  
208 takes a set of gene trees, computes a distance matrix (*ca* sum of number of edges in the path  
209 between two samples divided by the number of gene trees in which the two samples are  
210 represented) and infers a phylogeny from this distance matrix. Following recommendations  
211 for incomplete distance matrices, BioNJ was used to compute the phylogeny. Individual trees  
212 were inferred from each UCE using raxmlHPC-PTHREADS-AVX (Stamatakis 2014)  
213 (version 8.2.4; -f a -x 12345 -p 12345 -# 100 -m GTRGAMMA). ASTRAL and ASTRID  
214 analyses were performed with 100 multi-locus bootstrapping (MLBS, site-only resampling  
215 (Seo 2008)). Phylogenetic trees were estimated from the concatenate, unpartitioned data set  
216 using Maximum Likelihood (ML) approaches as implemented in RAxML and IQTREE  
217 v1.6.4 (Nguyen *et al.* 2015). For the RAxML analysis, a rapid bootstrap search (100  
218 replicates) followed by a thorough ML search (-m GTRGAMMA) was performed. For the  
219 IQTREE analysis, a ML search with the best-fit substitution model automatically selected was

220 performed with branch supports assessed with ultrafast bootstrap (Minh *et al.* 2013) and SH-  
221 aLRT test (Guindon *et al.* 2010) (1000 replicates).

222 Summary statistics for all data sets (alignment length, number of samples, number of variable  
223 sites, number of parsimony informative sites etc.) were calculated using AMAS (Borowiec  
224 2016). Tree annotation was performed with TreeGraph 2.13 (Stöver & Müller 2010).

225 Linear correlation between the number of UCEs and the quantity of DNA used to build the  
226 library was tested with the Pearson's correlation coefficient in R (R Core Team 2015).

227 Analyses were performed on a Dell PowerEdge T630 with 10 Intel Xeon E5-2687 dual-core  
228 CPUs (3.1 GHz, 9.60 GT/s), 125 Go RAM and 13 To hard drive and on the Genotoul Cluster  
229 (INRA, Toulouse).

230

## 231 **RESULTS**

232 Optimisations made for DNA extraction are detailed in the additional file 1. The final version  
233 of the library preparation protocol is available as additional files 2 and 3. Hereafter, the range  
234 of values provided between parentheses refers to the range of data that fall between the 2.5th  
235 percentile (LB=lower bound) and 97.5th percentile (UP = upper bound). Table S1 contains  
236 sequencing information for all samples. The median amount of input DNA was 25ng  
237 (LB=1.8ng; UP=250ng). An average of 76,330 reads (cleaned and merged) per sample was  
238 obtained (LB=3,359; UP=348,326). The average number of contigs was 3,454 (LB=546;  
239 UP=14,012) and the average sequencing depth was 18X (LB=3X; UP=44.0X). The average  
240 number of UCEs obtained per sample after filtering of problematic contigs was 687 (LB=193-  
241 UP=1,082) with a length comprised between LB=315 and UP=816bp (mean=603bp).

242 Figure 1 and S2 show the variation of the number of UCEs obtained with regard to the  
243 amount of input DNA. No significant correlation was observed (Pearson's correlation  
244 coefficient = 0.096, p-value = 0.36).

245 The final dataset (25%-complete matrix; i.e. at least 25 taxa on the 99 should have a sequence  
246 to keep the locus in the analysis) comprised 1,139 UCEs and 340,286bp (missing data = 47.0  
247 %; parsimony informative sites = 72.3 %; GC-content = 42.6%).  
248 Specimens retrieved from a previous study (Branstetter *et al.* 2017a) that were either  
249 represented by empirical data (*Euplectrus* sp.) or UCEs extracted from published genomes  
250 (*Copidosoma floridanum* and *Trichogramma pretiosum*) displayed a number of UCEs  
251 comparable to what was obtained for other specimens. Their placement in the trees (Figures  
252 2; S3-S5) was in accordance with their morphology. Whatever the method used (supermatrix  
253 approaches versus coalescent-based summary methods), all families, except for Aphelinidae,  
254 were recovered as monophyletic with high support. Aphelinids were split into three groups: 1)  
255 a monophyletic Aphelininae + Eretmocerinae; 2) Coccophaginae; 3) *Cales* sp. (Calesinae).  
256 The position of *Cales* was ambiguous. *Cales* was either recovered as sister to  
257 Trichogrammatidae (RAxML, low support) or as a lineage distinct from all other chalcidooids  
258 (all other analyses). Except for Mymaridae that was strongly placed as sister to all other  
259 Chalcidoidea in all analyses, the tree backbone remained poorly resolved. Statistical support  
260 was much higher within families. In all analyses Azotidae clustered with Signiphoridae, with  
261 strong support.

262

## 263 **DISCUSSION**

264 To our knowledge this study is the second after Sproul and Maddison (2017) to demonstrate  
265 success in library preparation from such low input using commercial kits, and the first to  
266 report successful sequencing of >1000 low copy genes in 96 specimens in parallel, from such  
267 low input and processing time. Our optimisations differ from what was proposed by Sproul  
268 and Maddison (2017). First, we tried to optimize DNA extraction itself by using overnight  
269 lysis with gentle mixing to preserve fragile specimens, heated elution buffer and increased

270 incubation time before elution. Second, instead of increasing the number of time-consuming  
271 purification steps we decreased them. It is noteworthy that in this library only two historical  
272 specimens were included. This may have masked challenges posed by adapter dimers (Burrell  
273 *et al.* 2015; Sproul & Maddison 2017; Tin *et al.* 2014) that led Sproul and Maddison (2017) to  
274 add a second bead clean-up prior to library amplification. However, we have already used this  
275 protocol on hundreds of chalcid and moth species, including historical specimens that were  
276 processed the same way as fresh ones and we never had such an issue. Finally, instead of  
277 increasing the number of amplification cycles prior to target enrichment, we used a new  
278 generation mastermix including a hot start, processive and high-fidelity polymerase  
279 (NEBNext Ultra II Q5 Master Mix). Our protocol also allows one to back-up DNA at several  
280 steps that allows for multiple attempts without delay in case the first attempt fails. Finally,  
281 sequencing was performed on a MiSeq to get longer flanking regions and, as a consequence,  
282 more information to differentiate closely related species.

283

284 The protocol was successfully used on minute chalcid wasps widely used for biological  
285 control purposes. Up to 1165 valid UCEs were captured from 25ng DNA (median amount of  
286 DNA used for this study). No correlation was observed between the quantity of DNA used for  
287 library preparation and the number of captured UCEs. The average number of captured UCEs  
288 validated by our quality control workflow was 687, and 685 valid UCEs were captured from a  
289 tiny aphelinid (1.8ng of input DNA). The number of UCEs obtained per individual appears to  
290 drop within the basal clades (i.e., Mymaridae and Trichogrammatidae, Figure S2), a result  
291 probably linked to the relatively long branches observed in these groups, and that could  
292 reduce the efficiency of the probes that were designed from the genome of *Nasonia* (Faircloth  
293 *et al.* 2015). Trees were well resolved at the family level, with high statistical support,  
294 showing the potential of UCEs to solve long-standing taxonomic issues. However, the tree



295 backbone remained unresolved, a pattern that confirms the rapid diversification of the group  
296 (Heraty *et al.* 2013; Peters *et al.* 2018). Understanding the evolutionary history of the group  
297 was not the purpose of this paper. Indeed, only a representative sampling in both markers and  
298 taxa as well as cutting-edge data analysis will allow drawing accurate conclusions. By  
299 providing suitable tools for a fast, easy and affordable acquisition of data, this paper is a first  
300 step.

301

302 Interestingly, as it has been shown previously on RADseq data (Cruaud *et al.* in press), WGA  
303 does not seem to bias the results even when input DNA used for the WGA is below the  
304 recommendation on the manufacturer kit (here 0.4 and 4 ng when the Genomiphi kit V2  
305 requires 10 ng). This further increases the possibilities opened by our protocol as input DNA  
306 as low as 0.2-0.3 ng may be used when an extra WGA step is included after DNA extraction  
307 (Cruaud *et al.* in press). It is noteworthy that reducing the amount of DNA required for library  
308 preparation allows one to use extracted DNA for different approaches in parallel (RADseq,  
309 amplicon, Shotgun etc.). This also allows one to send DNA back to museums from which  
310 specimens were borrowed, for archival purposes. We definitely agree with Sproul and  
311 Maddison (2017) who emphasize how important it is not to waste DNA obtained from  
312 irreplaceable specimens (whether fresh or historical). It is even more important to capitalize  
313 on existing collections as collecting samples for large-scale studies may be more and more  
314 difficult, given that many countries have imposed restrictive access regulations, even to  
315 academic researchers, to reduce the risk of supposed biopiracy (Divakaran Prathapan *et al.*  
316 2018).

317

318 All the elements discussed above indicate that this protocol may be of great help to  
319 reconstruct phylogenetic hypotheses in multiple groups of tiny arthropods, e.g., springtails,

320 sandflies, lice, whiteflies, mites, etc. Coupled or not with WGA, some steps of our protocol  
321 may also contribute to simplify and hasten construction of other reduced-representation  
322 libraries (RAD-Seq, ddRAD-Seq, etc). These methods may then be used to analyse species  
323 relationships, hybridization or population genomics (Cruaud *et al.* 2014; Eaton & Ree 2013;  
324 Emerson *et al.* 2010; Gagnaire *et al.* 2013; Hipp *et al.* 2014) on minute arthropods or on  
325 endangered species using non-invasive DNA sampling (Vila *et al.* 2009).

326

327

## 328 **ACKNOWLEDGEMENTS**

329 We are grateful to Nicole Fisher (CSIRO, National Museum of Australia, Canberra), Chris  
330 Burwell, Christine Lambkin and Susan Wright (Queensland Museum, Brisbane, Australia) for  
331 facilitating access to samples and to the Genotoul bioinformatics platform Toulouse Midi-  
332 Pyrenees, France for providing computing resources. AC thanks Lisa Schlée, Philippe Cruaud  
333 and Maya for their patience in the field and Jean-Pierre Rossi for his help with R. AG thanks  
334 V. Fursov (Schmalhausen Institute of Zoology, Ukraine) for his help with specimen  
335 identification. This work is part of a large NSF project (Award#1555808) led by John Heraty  
336 (UC Riverside USA) that attempts to solve the phylogeny of Chalcidoidea with NGS  
337 approaches, and was partly funded by the ANR project TriPTIC (ANR-14-CE18-0002) led by  
338 JYR and the SPE department of the INRA (French National Agronomic Institute). LF travels  
339 to France were supported by the grants IntegPar (89BM/2017) and NEVPIT (PN-III-P4-ID-  
340 PCE-2016-0233) awarded by the Romanian National Authority for Scientific Research,  
341 CNCS – UEFISCDI. This paper is dedicated to the memory of our friend Dr John La Salle,  
342 whose kindness and sense of humor will be remembered for ever.

343

## 344 **REFERENCES**

- 345 Al Khatib F, Fusu L, Cruaud A, *et al.* (2014) An integrative approach for species  
346 discrimination in the *Eupelmus urozonus* complex (Hymenoptera, Eupelmidae), with the  
347 descriptions of eleven new species from the West Palaearctic. *Systematic Entomology* **39**,  
348 806-862.
- 349 Andrews S (2010) FastQC - A Quality Control application for FastQ files. Available from  
350 <http://www.bioinformatics.babraham.ac.uk/projects/fastqc/>.
- 351 Blaimer BB, Brady SG, Schultz TR, *et al.* (2015) Phylogenomic methods outperform  
352 traditional multi-locus approaches in resolving deep evolutionary history: a case study of  
353 formicine ants. *BMC Evolutionary Biology* **15**, 271.
- 354 Blaimer BB, LaPolla JS, Branstetter MG, Lloyd MW, Brady SG (2016a) Phylogenomics,  
355 biogeography and diversification of obligate mealybug-tending ants in the genus  
356 *Acropyga*. *Molecular Phylogenetics and Evolution* **102**, 20-29.
- 357 Blaimer BB, Lloyd MW, Guillory WX, Brady SG (2016b) Sequence Capture and  
358 Phylogenetic Utility of Genomic Ultraconserved Elements Obtained from Pinned Insect  
359 Specimens. *PLoS ONE* **11**.
- 360 Bolger AM, Lohse M, Usadel B (2014) Trimmomatic: a flexible trimmer for Illumina  
361 sequence data. *Bioinformatics* **30**, 2114-2120.
- 362 Borowiec ML (2016) AMAS: a fast tool for alignment manipulation and computing of  
363 summary statistics. *PeerJ* **4**, e1660.
- 364 Bossert S, Murray EA, Blaimer BB, Danforth BN (2017) The impact of GC bias on  
365 phylogenetic accuracy using targeted enrichment phylogenomic data. *Molecular*  
366 *Phylogenetics and Evolution* **111**, 149-157.
- 367 Branstetter MG, Danforth BN, Pitts JP, *et al.* (2017a) Phylogenomic Insights into the  
368 Evolution of Stinging Wasps and the Origins of Ants and Bees. *Current Biology* **27**, 1019-  
369 1025.
- 370 Branstetter MG, Jesovnik A, Sosa-Calvo J, *et al.* (2017b) Dry habitats were crucibles of  
371 domestication in the evolution of agriculture in ants. *Proceedings of the Royal Society B-*  
372 *Biological Sciences* **284**.
- 373 Branstetter MG, Longino JT, Ward PS, Faircloth BC (2017c) Enriching the ant tree of life:  
374 enhanced UCE bait set for genome-scale phylogenetics of ants and other Hymenoptera.  
375 *Methods in Ecology and Evolution* **8**, 768-776.
- 376 Burks RA, Heraty JM, Gebiola M, Hansson C (2011) Combined molecular and  
377 morphological phylogeny of Eulophidae (Hymenoptera: Chalcidoidea), with focus on the  
378 subfamily Entedoninae. *Cladistics* **27**, 1-25.
- 379 Burrell AS, Disotell TR, Bergey CM (2015) The use of museum specimens with high-  
380 throughput DNA sequencers. *Journal of Human Evolution* **79**, 35-44.
- 381 Chen Y, Hui XA, Fu JZ, Huang DW (2004) A molecular phylogeny of eurytomid wasps  
382 inferred from DNA sequence data of 28S, 18S, 16S, and COI genes. *Molecular*  
383 *Phylogenetics and Evolution* **31**, 300-307.
- 384 Consoli FL, Parra JRP, Zucchi RA, (Eds.) (2010) *Egg parasitoids in agroecosystems with*  
385 *emphasis on Trichogramma* Springer, Dordrecht.
- 386 Cruaud A, Gautier M, Galan M, *et al.* (2014) Empirical assessment of RAD sequencing for  
387 interspecific phylogeny. *Molecular Biology and Evolution* **31**, 1272-1274.
- 388 Cruaud A, Groussier G, Genson G, Sauné L, Rasplus J-Y (in press) Pushing the limits of  
389 whole genome amplification: successful sequencing of RADseq libraries from single  
390 micro-hymenoptera (Chalcidoidea, *Trichogramma*). *PeerJ* **6**, e26939v26931.
- 391 Cruaud A, Rønsted N, Chantarasuwan B, *et al.* (2012) An extreme case of plant-insect co-  
392 diversification: figs and fig-pollinating wasps. *Systematic Biology* **61**, 1029-1047.

- 393 Desjardins CA, Regier JC, Mitter C (2007) Phylogeny of pteromalid parasitic wasps  
394 (Hymenoptera : Pteromalidae): Initial evidence from four protein-coding nuclear genes.  
395 *Molecular Phylogenetics and Evolution* **45**, 454-469.
- 396 Divakaran Prathapan K, Pethiyagoda R, Bawa KS, *et al.* (2018) When the cure kills—CBD  
397 limits biodiversity research. National laws fearing biopiracy squelch taxonomy studies.  
398 *Science* **360**, 1405-1406.
- 399 Eaton DAR, Ree RH (2013) Inferring phylogeny and introgression using RADseq data: An  
400 example from flowering plants (*Pedicularis*: Orobanchaceae). *Systematic Biology* **62**, 689-  
401 706.
- 402 Emerson KJ, Merz CR, Catchen JM, *et al.* (2010) Resolving postglacial phylogeography  
403 using high-throughput sequencing. *Proceedings of the National Academy of Sciences of the*  
404 *United States of America* **107**, 16196-16200.
- 405 Faircloth BC, Branstetter MG, White ND, S.G. B (2015) Target enrichment of ultraconserved  
406 elements from arthropods provides a genomic perspective on relationships among  
407 Hymenoptera. *Molecular Ecology Resources* **15**, 489-501.
- 408 Faircloth BC, McCormack JE, Crawford NG, *et al.* (2012) Ultraconserved Elements Anchor  
409 Thousands of Genetic Markers Spanning Multiple Evolutionary Timescales. *Systematic*  
410 *Biology* **61**, 717-726.
- 411 Gagnaire PA, Normandeau E, Pavey SA, Bernatchez L (2013) Mapping phenotypic,  
412 expression and transmission ratio distortion QTL using RAD markers in the Lake  
413 Whitefish (*Coregonus clupeaformis*). *Molecular Ecology* **22**, 3036-3048.
- 414 Gasc C, Peyret P (2018) Hybridization capture reveals microbial diversity missed using  
415 current profiling methods. *Microbiome* **6**, 61.
- 416 Gasc C, Peyretailade E, Peyret P (2016) Sequence capture by hybridization to explore  
417 modern and ancient genomic diversity in model and nonmodel organisms. *Nucleic Acids*  
418 *Research* **44**, 4504-4518.
- 419 Gibson GAP, Heraty JM, Woolley JB (1999) Phylogenetics and classification of Chalcidoidea  
420 and Mymarommatoidea - a review of current concepts (Hymenoptera, Apocripta).  
421 *Zoologica Scripta* **28**, 87-124.
- 422 Gibson GAP, Read J, Huber JT (2007) Diversity, Classification and higher relationships of  
423 Mymarommatoidea (Hymenoptera). *Journal of Hymenoptera Research* **16**, 51-146.
- 424 Guindon S, Dufayard JF, Lefort V, *et al.* (2010) New algorithms and methods to estimate  
425 maximum-likelihood phylogenies: assessing the performance of PhyML 3.0. *Systematic*  
426 *Biology* **59**, 307-321.
- 427 Harris RS (2007) *Improved pairwise alignment of genomic DNA*. Ph.D. Thesis Ph.D. Thesis,  
428 The Pennsylvania State University.
- 429 Heraty JM (2009) Parasitoid biodiversity and insect pest management. In: *Insect biodiversity:*  
430 *science and society* (eds. Footitt B, Adler P), pp. 445-462. Netherlands: Springer-Verlag  
431 Press.
- 432 Heraty JM, Burks RA, Cruaud A, *et al.* (2013) A phylogenetic analysis of the megadiverse  
433 Chalcidoidea (Hymenoptera). *Cladistics* **29**, 466-542.
- 434 Hipp AL, Eaton DAR, Cavender-Bares J, *et al.* (2014) A framework phylogeny of the  
435 american oak clade based on sequenced RAD data. *PLoS ONE* **9**, e93975.
- 436 Huang X, Madan A (1999) CAP3: A DNA sequence assembly program. *Genome Research* **9**,  
437 868-877.
- 438 Huber JT, Noyes JS (2013) A new genus and species of fairyfly, *Tinkerbella nana*  
439 (Hymenoptera, Mymaridae), with comments on its sister genus *Kikiki*, and discussion on  
440 small size limits in arthropods. *Journal of Hymenoptera Research* **32**, 17-44.
- 441 Janšta P, Cruaud A, Delvare G, *et al.* (2017) Torymidae (Hymenoptera, Chalcidoidea)  
442 revised: molecular phylogeny, circumscription and reclassification of the family with

- 443 discussion of its biogeography and evolution of life-history traits. *Cladistics*. *Cladistics*  
444 **inpress**.
- 445 Jesovnik A, Sosa-Calvo J, Lloyd MW, *et al.* (2017) Phylogenomic species delimitation and  
446 host-symbiont coevolution in the fungus-farming ant genus *Sericomyrmex* Mayr  
447 (Hymenoptera: Formicidae): ultraconserved elements (UCEs) resolve a recent radiation.  
448 *Systematic Entomology* **42**, 523-542.
- 449 Katoh K, Standley DM (2013) MAFFT multiple sequence alignment software version 7:  
450 improvements in performance and usability. *Molecular Biology and Evolution* **30**, 772-  
451 780.
- 452 Kearse M, Moir R, Wilson A, *et al.* (2012) Geneious Basic: an integrated and extendable  
453 desktop software platform for the organization and analysis of sequence data.  
454 *Bioinformatics* **28**, 1647-1649.
- 455 Kenyon SG, Buerki S, Hansson C, Alvarez N, Benrey B (2015) Uncovering cryptic parasitoid  
456 diversity in *Horismenus* (Chalcidoidea, Eulophidae). *PLoS ONE* **10**, e0136063.
- 457 Lemmon EM, Lemmon AR (2013) High-throughput genomic data in systematics and  
458 phylogenetics. *Annual Review of Ecology Evolution and Systematics* **44**, 99-121.
- 459 Magoc T, Salzberg SL (2011) FLASH: fast length adjustment of short reads to improve  
460 genome assemblies. *Bioinformatics* **27**, 2957-2963.
- 461 Mamanova L, Coffey AJ, Scott CE, *et al.* (2010) Target-enrichment strategies for next-  
462 generation sequencing. *Nature Methods* **7**, 111-118.
- 463 McCormack JE, Harvey MG, Faircloth BC, *et al.* (2013) A Phylogeny of Birds Based on  
464 Over 1,500 Loci Collected by Target Enrichment and High-Throughput Sequencing. *PLoS*  
465 *ONE* **8**.
- 466 Minh BQ, Nguyen MAT, von Haeseler A (2013) Ultrafast approximation for phylogenetic  
467 bootstrap. *Molecular Biology and Evolution* **30**, 1188-1195.
- 468 Mottern JL, Heraty JM (2014) Revision of the *Cales noacki* species complex (Hymenoptera,  
469 Chalcidoidea, Aphelinidae). *Systematic Entomology* **39**, 354-379.
- 470 Munro JB, Heraty JM, Burks RA, *et al.* (2011) A molecular phylogeny of the Chalcidoidea  
471 (Hymenoptera). *PLoS ONE* **6**, e27023.
- 472 Muraya MM, Schmutzer T, Ulpinnis C, Scholz U, Altmann T (2015) Targeted sequencing  
473 reveals large-scale sequence polymorphism in maize candidate genes for biomass  
474 production and composition. *PLoS ONE* **10**, e0132120.
- 475 Nguyen LT, Schmidt HA, von Haeseler A, Minh BQ (2015) IQ-TREE: A fast and effective  
476 stochastic algorithm for estimating maximum likelihood phylogenies. *Molecular Biology*  
477 *and Evolution* **32**, 268-274.
- 478 Noyes JS (2018) Universal Chalcidoidea Database. World Wide Web electronic publication.  
479 <<http://www.nhm.ac.uk/chalcidoids>> (accessed march 2018).
- 480 Owen AK, George J, Pinto JD, Heraty JM (2007) A molecular phylogeny of the  
481 Trichogrammatidae (Hymenoptera : Chalcidoidea), with an evaluation of the utility of their  
482 male genitalia for higher level classification. *Systematic Entomology* **32**, 227-251.
- 483 Peters RS, Niehuis O, Gunkel S, *et al.* (2018) Transcriptome sequence-based phylogeny of  
484 chalcidoid wasps (Hymenoptera: Chalcidoidea) reveals a history of rapid radiations,  
485 convergence, and evolutionary success. *Molecular Phylogenetics and Evolution* **120**, 286-  
486 296.
- 487 Pinto JD, Stouthamer R, Platner GR, Oatman ER (1991) Variation in reproductive  
488 compatibility in *Trichogramma* and its taxonomic significance (Hymenoptera:  
489 Trichogrammatidae). *Annals of the Entomological Society of America* **84(1)**, 37-46.
- 490 Prebus M (2017) Insights into the evolution, biogeography and natural history of the acorn  
491 ants, genus *Temnothorax* Mayr (hymenoptera: Formicidae). *BMC Evolutionary Biology*  
492 **17**, 250.



- 493 R Core Team (2015) *R: A language and environment for statistical computing*. R Foundation  
494 for Statistical Computing, Vienna, Austria. URL <http://www.r-project.org/>.  
495 Seo TK (2008) Calculating bootstrap probabilities of phylogeny using multilocus sequence  
496 data. *Molecular Biology and Evolution* **25**, 960-971.  
497 Smith BT, Harvey MG, Faircloth BC, Glenn TC, Brumfield RT (2014) Target capture and  
498 massively parallel sequencing of ultraconserved elements for comparative studies at  
499 shallow evolutionary time scales. *Systematic Biology* **63**, 83-95.  
500 Sproul JS, Maddison DR (2017) Sequencing historical specimens: successful preparation of  
501 small specimens with low amounts of degraded DNA. *Molecular Ecology Resources* **17**,  
502 1183-1201.  
503 Stamatakis A (2014) RAxML version 8: a tool for phylogenetic analysis and post-analysis of  
504 large phylogenies. *Bioinformatics* **30**, 1312-1313.  
505 Stouthamer R, Luck RF, Hamilton WD (1990) Antibiotics cause parthenogenetic  
506 *Trichogramma* (Hymenoptera: Trichogrammatidae) to revert to sex. *Proceedings of the*  
507 *National Academy of Sciences, USA* **87**, 2424-2427.  
508 Stöver BC, Müller KF (2010) TreeGraph 2: Combining and visualizing evidence from  
509 different phylogenetic analyses. *BMC Bioinformatics* **11**, 7.  
510 Talavera G, Castresana J (2007) Improvement of phylogenies after removing divergent and  
511 ambiguously aligned blocks from protein sequence alignments. *Systematic Biology* **56**,  
512 564-577.  
513 Tin M-Y, Economo EP, Mikheyev AS (2014) Sequencing degraded DNA from non-  
514 destructively sampled museum specimens for RADtagging and low-coverage shotgun  
515 phylogenetics. *PLoS ONE* **9**, e96793.  
516 Vachaspati P, Warnow T (2015) ASTRID: Accurate Species TREes from Internode Distances.  
517 *BMC Genomics* **16(Suppl 10)**, S3.  
518 Vila M, Auger-Rozenberg MA, Goussard F, Lopez-Vaamonde C (2009) Effect of non-lethal  
519 sampling on life-history traits of the protected moth *Graellsia isabelae* (Lepidoptera:  
520 Saturniidae). *Ecological Entomology* **34**, 356-362.  
521 Ward PS, Branstetter MG (2017) The acacia ants revisited: convergent evolution and  
522 biogeographic context in an iconic ant/plant mutualism. *Proceedings of the Royal Society*  
523 *B-Biological Sciences* **284**, 20162569.  
524 Werren JH, Loehlin DW (2009) The parasitoid wasp *Nasonia*: an emerging model system  
525 with haploid male genetics. *Cold Spring Harbor protocols* **pdb.emo134**.  
526 Zhang C, Rabiee M, Sayyari E, Mirarab S (2018) ASTRAL-III: polynomial time species tree  
527 reconstruction from partially resolved gene trees. *BMC Bioinformatics* **19**, 153.  
528  
529

#### 530 DATA ACCESSIBILITY

531 Demultiplexed reads are available as a NCBI Sequence Read Archive (ID#XXX)

532

#### 533 AUTHOR CONTRIBUTIONS

534 Designed the study: AC, JYR; contributed samples and identifications: AC, LF, AG, JH, AP,

535 JYR; optimized protocol: SN with the help of AC, JYR, PA; performed lab work: SN with the

536 help of AC, JYR, LF; sequenced libraries: AW; analysed data: AC, JYR; drafted the

537 manuscript: AC, JYR. All authors commented on the manuscript.

538

### 539 TABLES AND FIGURES

540

541

542 **Figure 1. Variation of the number of UCEs with regard to the amount of input DNA**  
543 **(ng).**

544

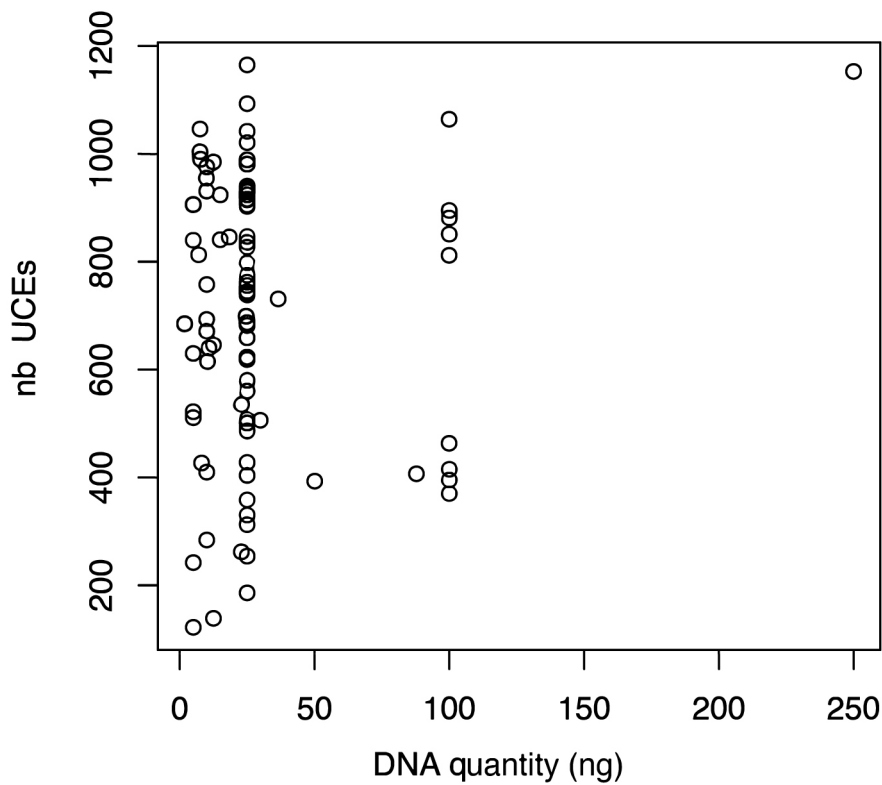

545

546

547

548

549 **Figure 2. RAxML tree obtained from the analysis of the 25%-complete data set.**  
 550 Black squares indicate node supported with RAxML BP = 100, IQTREE aLRT = 100 / BP = 100 and  
 551 ASTRAL/ASTRID BP > 75. Grey square indicates node with RAxML BP = 100, IQTREE aLRT = 100 / BP =  
 552 100 and ASTRAL BP > 75. White squares indicate nodes with RAxML BP > 95 and IQTREE aLRT > 80 / BP >  
 553 95. The DNA quantity used to build the library as well as the number of UCEs analysed for each sample is given  
 554 in brackets. Photos ©J.-Y. Rasplus. Scale bars = 500 µm. IQTREE, ASTRAL and ASTRID trees are available in  
 555 figures S3-S5.  
 556

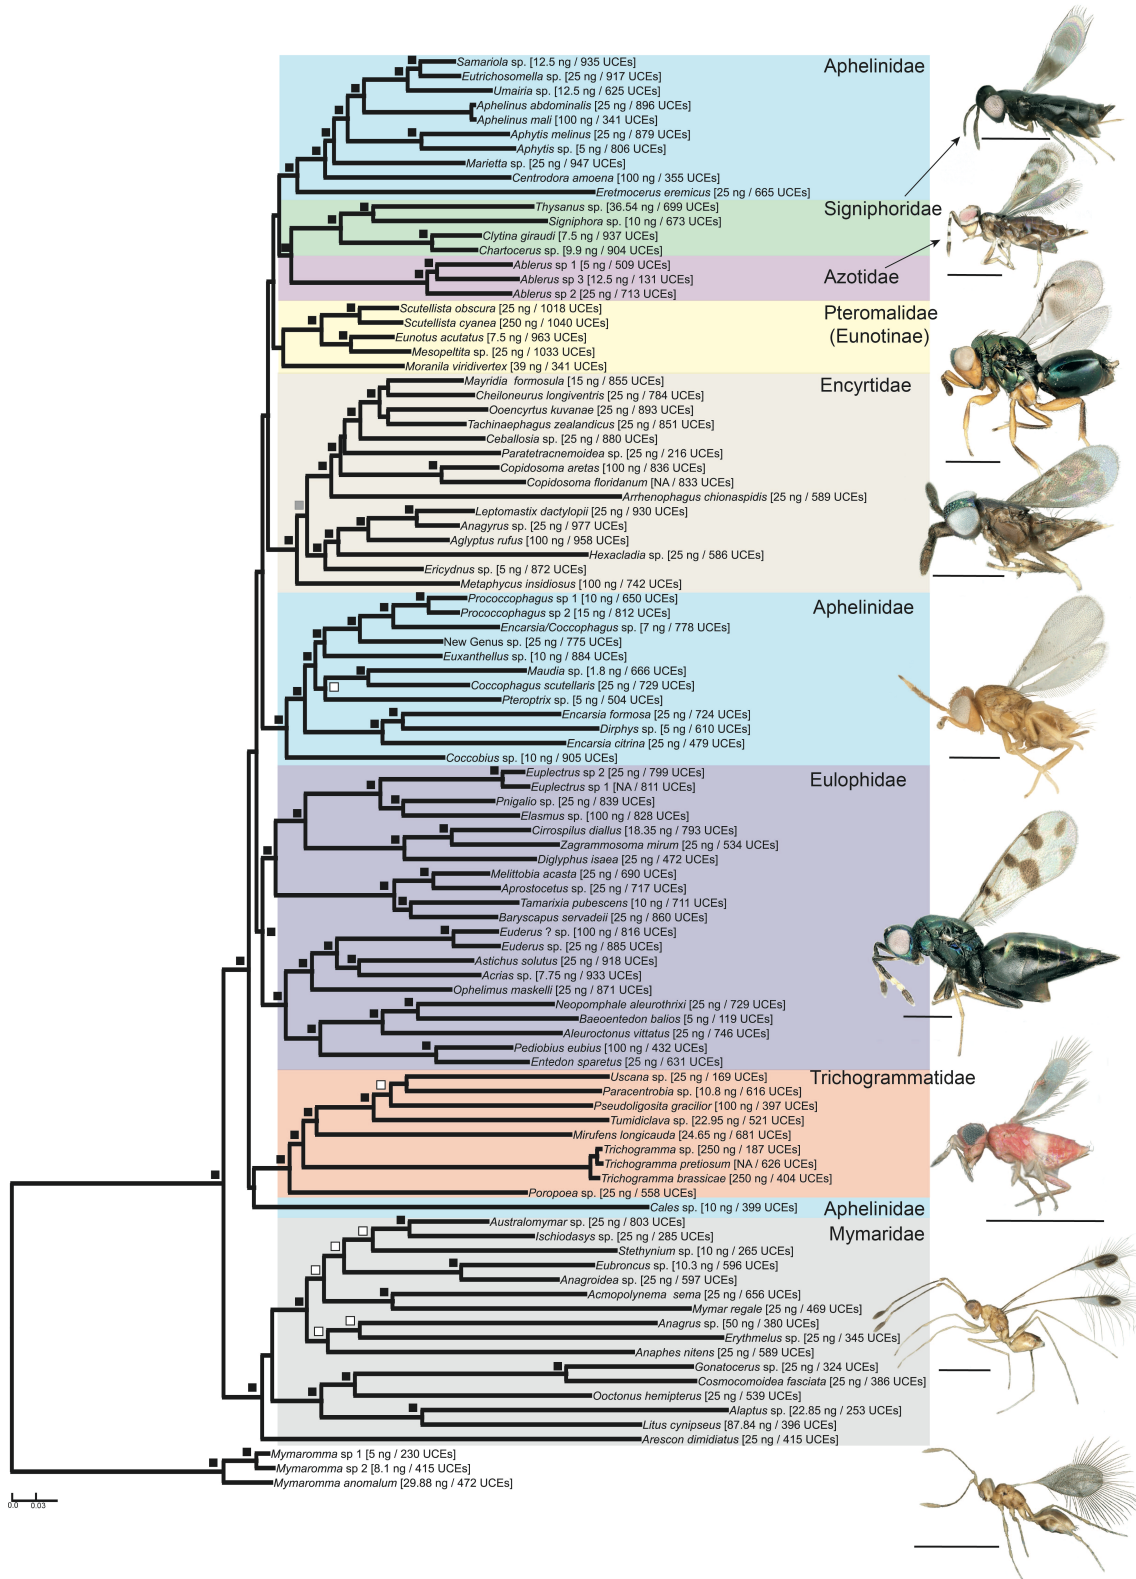



## **Supplementary material to:**

### **Optimised DNA extraction and library preparation for minute arthropods: application to target enrichment in chalcid wasps used for biocontrol.**

Astrid Cruaud<sup>1\*</sup>, Sabine Nidelet<sup>1</sup>, Pierre Arnal<sup>1,2</sup>, Audrey Weber<sup>3</sup>, Lucian Fusu<sup>4</sup>, Alex Gumovsky<sup>5</sup>, John Huber<sup>6</sup>, Andrew Polaszek<sup>7</sup> and Jean-Yves Rasplus<sup>1</sup>

**Additional file 1 Optimized protocol for DNA extraction (page 22)**

**Additional file 2: Optimized protocol for library preparation (page 25)**

**Additional file 3: Adapter sequences and hybridization (page 31)**

**Additional file 4: Custom scripts/command lines used in the analytical workflow (page 34)**

**Additional file 5: Reference UCEs (page 35)**

**Additional file 6: Correspondence between reference UCE numbers and probes designed by Faircloth et al. (2015) (page 89)**

**Table S1: Samples used in this study and results of the UCE-enrichment experiment (page 132)**

**Figure S1: Workflow used for raw data cleaning (page 136)**

**Figure S2: RAxML tree obtained from the analysis of the 25%-complete data set. The histogram on the side of the tree shows the distribution of the number of UCEs analysed for each sample. (page 137)**

Black squares indicate node supported with RAxML BP = 100, IQTREE aLRT = 100 / BP = 100 and ASTRAL/ASTRID BP > 75. Grey square indicates node with RAxML BP = 100, IQTREE aLRT = 100 / BP = 100 and ASTRAL BP > 75. White squares indicate nodes with RAxML BP > 95 and IQTREE aLRT > 80 / BP > 95.

**Figure S3: IQTREE tree obtained from the analysis of the 25%-complete data set (page 138)**

SH-aLRT / UFboot values are indicated at nodes.

The DNA quantity used to build the library as well as the number of UCEs analysed for each sample is given in brackets.

**Figure S4 ASTRAL tree obtained from the analysis of the 25%-complete data set (page 139)** Bootstrap supports (site-only resampling) are indicated at nodes. The DNA quantity used to build the library as well as the number of UCEs analysed for each sample is given in brackets.

**Figure S5 ASTRID tree obtained from the analysis of the 25%-complete data set (page 140)** Bootstrap supports (site-only resampling) are indicated at nodes. The DNA quantity used to build the library as well as the number of UCEs analysed for each sample is given in brackets.

## Additional file 1: Optimized protocol for DNA extraction

Optimisations were done to the DNeasy Blood & Tissue Kit (250) protocol (Qiagen)

### Consumables

Tweezers and fine brush/or forceps to manipulate specimens; 1 pot with bleach at a 1:10 dilution with osmosis cleaned water; 1 pot with osmosis cleaned water to wash tweezers/forceps, cup, paper towels, sterile gloves, 50ml Falcon™ tube, 1.5ml Safe-lock tubes (Eppendorf), 1,5ml Microtubes DNA LoBind (Eppendorf).

-----day 1 / afternoon-----

- Label 1.5ml safe-lock tubes with sample codes. Close caps. Put under UV light for 10 min.
- Equilibrate frozen specimens to room temperature before processing.
- Dry specimens on clean paper towel to remove EtOH. Place specimen in tube. Clean forceps to avoid contamination between 2 different specimens: bleach, then water, then dry with paper towel.
- Add 200µl buffer ATL (Qiagen) to each tube.  
(NB DNeasy® Blood & Tissue Handbook uses 180µl; we use 200µl to improve diffusion of the DNA from the specimen)
- Add 20µl proteinase K to each tube (or prepare a master mix of buffer ATL + proteinase K and add master mix to tubes.)
- Vortex + Pulse spin.  
(NB if the specimens are fragile, i.e. old and dry mounted collection specimens, dispense the master mix of buffer ATL + proteinase K to each tube and then add specimens; or dispense specimens to tubes and then add the master mix. Do not vortex at all to avoid damage to specimens and place the tubes directly in the thermomixer after ensuring that the specimens are in the liquid.)
- Place tubes in thermomixer (Eppendorf) at 56°C and 300 rpm overnight.

-----day 2 / morning-----

- Remove tubes from thermomixer.
- Vortex + pulse spin.  
(NB if working with fragile specimens do not vortex. Pulse spin, transfer all the liquid to a new labelled tube leaving the specimen behind and then proceed to the next step.)

(DNeasy® Blood & Tissue Handbook, p. 15, recommends using carrier DNA or RNA for samples containing less than 5 µg of DNA. Though this was not used for this publication, poly (A) RNA (2 µl of 2 µg/µl) is added to the lysate before the next step by one of us (LF) for routine DNA purification from small or old specimens. This should not interfere with library preparation as it was used for example by Sproul & Maddison (2017) as recommended in the QIAamp DNA Micro Kit by Qiagen.)

- Add 200µl buffer AL to each tube (kit Qiagen). (DNeasy® Blood & Tissue Handbook, p. 19, 29 recommends adding RNase A if RNA-free genomic DNA is required. We do not use it because the copurified RNA is not interfering with target enrichment anyway and because RNase A also degrades DNA; see Donà & Houseley (2015).)

A white precipitate may appear that will dissolve during incubation at 70°C.

- Vortex + pulse spin.
- Incubate tubes in thermomixer at 70°C and 300 rpm for 10 minutes.
- During that time, prepare DNeasy mini spin Qiagen columns and 1.5 ml DNA LoBind Eppendorf tubes (label tubes with sample codes). (NB LoBind tubes minimize DNA loss during storage by reducing sample-to-surface binding.)

- Aliquot buffer AE in Eppendorf tubes and heat at 56°C in thermomixer (heated buffer will improve the release of DNA from the resin.)

- Add 200µl absolute ethanol (not provided with the Qiagen kit) to each tube. (NB only high purity ethanol should be used; cheap ethanol may contain traces of other chemicals that will interfere with the solubilisation of the DNA from the membrane in the last step.)

- Vortex + Pulse spin.
- Pipette the liquid (including precipitate) from each tube and transfer into a DNeasy mini spin Qiagen column placed in a 2 ml collection tube (Qiagen kit).
- Centrifuge columns + collection tubes at 6000 x g (8000 rpm) for 1 minute; discard the flow-through and collection tubes. Keep the columns.
- Place spin columns in new collection tubes.
- Add 500µl buffer AW1 (kit Qiagen).
- Centrifuge at 6000 x g (8000rpm) for 1 minute; discard the flow-through and collection tubes. Keep the columns.
- Place spin columns in new collection tubes.
- Add 500µl buffer AW2 (kit Qiagen).
- Centrifuge at 20,000 x g (14,000 rpm) for 3 minutes to dry the columns.
- Rotate columns to 180 degrees in their collection tubes and centrifuge again at 20000 xg (14000rpm) for 3 minutes (this will make sure the column is well dried).
- Place dried spin columns in 1.5ml LoBind tubes that you previously labelled.
- Add 50µl of heated AE buffer. **Deposit buffer right in the middle of the resin.**
- Incubate 15 min at room temperature (**meanwhile, reheat buffer AE.**)
- Centrifuge at 6000 x g (8000 rpm) for 1 minute.
- Rotate columns to 180 degrees and centrifuge again at 6000 x g (8000 rpm) for 1 minute.
- Remove columns + tubes from the centrifuge.
- Add again 50µl of heated buffer **right in the middle of the resin.**
- Incubate 15 min at room temperature.
- Centrifuge at 6000 x g (8000 rpm) for 1 minute at room temperature.
- Rotate columns to 180 degrees and centrifuge again at 6000 x g (8000 rpm) for 1 minute.
- DNA (ca 2 x 50µl) is ready for use.

- Add distilled water to the extracted specimens and incubate at room temperature for 30 min.

(NB water is used to eliminate the residual salts left by the buffers. Otherwise they usually crystallise on the specimen upon storage in ethanol.)

- Remove water and replace with ethanol. Keep specimens in the dark in a freezer until mounting.

(NB if the specimens are stored at room temperature under ambient light they will become sun-bleached very quickly, much quicker than unextracted specimens.)

- Use a critical point dryer, hexamethyldisilazane, acetone or amyl acetate to dry the specimens before mounting. Do not air dry as they will collapse.

#### **References cited:**

Donà, F., Houseley, J., 2015. Expect the Unexpected - RNase A may still catch you by surprise *Labtimes* 1, 46. Available online at [http://www.labtimes.org/labtimes/trick/tricks/2015\\_01.lasso](http://www.labtimes.org/labtimes/trick/tricks/2015_01.lasso)

DNeasy® Blood & Tissue Handbook: <https://www.qiagen.com/it/resources/resourcedetail?id=6b09dfb8-6319-464d-996c-79e8c7045a50&lang=en>

Sproul, J.S., Maddison, D.R. 2017. Sequencing historical specimens: successful preparation of small specimens with low amounts of degraded DNA. *Molecular Ecology Resources*, 17(6), 1183-1201.

## Additional file 2: Optimized protocol for library preparation

### 1. DNA quantification

Qubit® 2.0 Fluorometer (Invitrogen); dsDNA HS Assay Kit.

### 2. DNA normalization and shearing

Bioruptor ® Pico, sonication bath-based rotor 12 samples in parallel.

Transfer 100µl of input DNA in tubes adapted to the Bioruptor ® Pico that will be used for DNA shearing (Diagenode tubes 0.5ml). [now we shear 30ng DNA in routine but you can use as little as 1.8 ng, see main text]

Set up the following program for DNA shearing to obtain a mean fragment size of ca 400pb:

15sec ON / 90sec OFF for 8 cycles.

You can STOP here for up to 1 week (store tubes in a freezer at -20°C).

**The NEBNext Ultra II DNA Library prep kit for Illumina by NEB will be used for End repair, A tailing, Adapter ligation and PCR enrichment of adaptor-ligated DNA.**

### 3. End repair + A tailing

To keep a backup, only 50 µl of the sheared DNA is used [you may want to re-concentrate DNA on beads in 50 µl when you have a small amount i.e. < 5 ng]

Transfer 50 µl of sheared DNA into a strip / plate.

Thaw NEBNext Ultra II End Prep Reaction Buffer. Vortex + pulse spin.

ATTENTION: Pull out NEBNext Ultra II End Prep Enzyme Mix out of freezer just before use. LIGHT vortex + pulse spin.

|                                           | Master Mix: | x1 reaction | x 96 reactions |
|-------------------------------------------|-------------|-------------|----------------|
| NEBNext Ultra II End Prep Enzyme Mix      |             | 3 µl        | 288 µl         |
| NEBNext Ultra II End Prep Reaction Buffer |             | 7 µl        | 672 µl         |
| Master mix to add to each tube            |             | 10 µl       |                |

Vortex master mix gently + pulse spin.

- Add 10µl of master mix to tubes containing 50µl of sheared DNA.
- Vortex (**mix well.**)
- Pulse spin.
- Place in a thermocycler. **Enable heated lid** and run the following program:
  - 30 min at 20°C**
  - 30 min at 65°C**
  - Hold at 4°C.**

## PROCEED WITHOUT DELAY TO ADAPTER LIGATION

### 4. Adapter ligation and cleanup

See **additional file 3** for adapter sequences and hybridization.

Thaw adapters (1.5µM). Centrifuge to avoid cross contamination. Open carefully.

For 96 samples use the following tagging scheme:

|      |       |      |       |      |       |      |       |      |       |      |       |
|------|-------|------|-------|------|-------|------|-------|------|-------|------|-------|
| P1-1 | P1-9  | P1-1 | P1-9  | P1-1 | P1-9  | P1-1 | P1-9  | P1-1 | P1-9  | P1-1 | P1-9  |
| P1-2 | P1-10 | P1-2 | P1-10 | P1-2 | P1-10 | P1-2 | P1-10 | P1-2 | P1-10 | P1-2 | P1-10 |
| P1-3 | P1-11 | P1-3 | P1-11 | P1-3 | P1-11 | P1-3 | P1-11 | P1-3 | P1-11 | P1-3 | P1-11 |
| P1-4 | P1-12 | P1-4 | P1-12 | P1-4 | P1-12 | P1-4 | P1-12 | P1-4 | P1-12 | P1-4 | P1-12 |
| P1-5 | P1-13 | P1-5 | P1-13 | P1-5 | P1-13 | P1-5 | P1-13 | P1-5 | P1-13 | P1-5 | P1-13 |
| P1-6 | P1-14 | P1-6 | P1-14 | P1-6 | P1-14 | P1-6 | P1-14 | P1-6 | P1-14 | P1-6 | P1-14 |
| P1-7 | P1-15 | P1-7 | P1-15 | P1-7 | P1-15 | P1-7 | P1-15 | P1-7 | P1-15 | P1-7 | P1-15 |
| P1-8 | P1-16 | P1-8 | P1-16 | P1-8 | P1-16 | P1-8 | P1-16 | P1-8 | P1-16 | P1-8 | P1-16 |
| P2-1 |       | P2-2 |       | P2-3 |       | P2-4 |       | P2-5 |       | P2-6 |       |

Thaw NEBNext Ultra II Ligation master mix. Light vortex + Pulse spin.

Thaw NEBNext Ligation enhancer. Light Vortex + pulse spin.

|                                      | <b>Master Mix:</b> |                |
|--------------------------------------|--------------------|----------------|
|                                      | x1 reaction        | x 96 reactions |
| NEBNext Ultra II Ligation master mix | 30 µl              | 2880 µl        |
| NEBNext Ligation enhancer            | 1 µl               | 96 µl          |
| Master mix to add to each tube       | 31 µl              |                |

### **Vortex (mix well) + pulse spin**

- Add 31 µl of master mix to tubes containing the 60 µl end prep reaction mixture obtained in the previous step.
- Add 1.25 µl of P1 adapters (1.5µM) and 1.25 µl of P2 adapters (1.5 µM) to each tube.
- Vortex (**mix well.**)
- Pulse spin.
- Place in a thermocycler. **Disable heated lid** and run the following program:  
**15 min at 20°C.**

(NB samples can be stored overnight at -20°C.)

### **Clean-up adaptor ligated DNA (remove dimers of adapters):**

Purification was conducted with the Agencourt AMPure XP Purification system (Beckman Coulter) and a ALPAQUA magnet plate.

Pull Ampure beads out of fridge. Make sure they are at room temperature (RT) before use.

- Vortex Ampure beads.
- Add 0.8 vol. of Ampure beads for 1 vol. of DNA (i.e. 74.8 µl of beads for 93.5 µl of DNA => vol. tot. = 168.3 µl).

- Vortex + pulse spin.
- Incubate for **5min** at RT.
- Move strip to magnetic rack and wait for **2 to 5min**.
- Remove and discard supernatant without disturbing beads.
- Do not remove tubes from magnetic rack and add **200 µl of 70 % ethanol** without disturbing beads (use freshly made 70% ethanol to ensure accurate concentration.)
- Wait for **30s** (leave cap open.)
- Remove and discard supernatant without disturbing beads.
- Add again **200 µl of 70 % ethanol**.
- Wait for **30s** (leave cap open.)
- Remove and discard supernatant without disturbing beads.
- **Make sure to remove all traces of ethanol** (use a 10µl micropipette if necessary.)
- Dry for **5 min** (leave cap open.)
- Do not remove tubes from magnetic rack and add **15µl of buffer EB**.
- Close cap.
- Remove strip from magnetic rack.
- Vortex + pulse spin.
- Wait for **2min**.
- Move strip back to magnetic rack and wait for **2 to 5min**.
- Transfer the **15µl** of DNA to a new strip.

## 5. PCR enrichment of adaptor-ligated DNA

Thaw NEBNext Ultra II Q5 Master Mix. Homogenize by pipetting + Pulse spin. DO NOT VORTEX. Leave on Ice.

|                                | <b>Master Mix:</b> |                |
|--------------------------------|--------------------|----------------|
|                                | x 1 reaction       | x 96 reactions |
| NEBNext Ultra II Q5 Master Mix | 25 µl              | 2400 µl        |
| Primer F (10µM)                | 2 µl               | 192 µl         |
| Primer R (10µM)                | 2 µl               | 192 µl         |
| Master mix to add to each tube | 29 µl              |                |

With

Primer F = AATGATACGGCGACCACCG\*A

Primer R = CAAGCAGAAGACGGCATAACG\*A

(synthesized by IDT (Integrated DNA Technologies, Inc.), HPLC Purification, \* = Phosphorothioate Bond.)

### **Vortex + pulse spin master mix**

- Add 29 µl of master mix to tubes containing the 15 µl of adaptor ligated DNA.
- Vortex.
- Pulse spin.
- Place in a thermocycler. **Enable heated lid** and run the following program:

|             | 15 cycles |      |      |      |     |
|-------------|-----------|------|------|------|-----|
| Time        | 30s       | 10s  | 75s  | 5min | ∞   |
| Temperature | 98°C      | 98°C | 65°C | 65°C | 4°C |

## **6. Quantification, equimolar pooling and re-concentration**

Qubit - quantify 2  $\mu$ l of each library.

In our experience, a clean-up step of the libraries is not necessary.

Prepare 6 pools of 16 samples in 1.5ml LoBind tubes.

Pool 100 ng of each library (you want a final quantity of 100-500ng DNA per pool after concentration to fit with the requirements of the MYbaits® protocol.)

**On beads Concentration of DNA** (Agencourt AMPure XP Purification system (Beckman Coulter)). Concentration of DNA is required, as MyBaits require 7  $\mu$ l of starting material.

Remove Ampure beads from fridge. Make sure they are at room temperature (RT) before use.

- Vortex Ampure beads.
- Add 0.8 vol. of Ampure beads for 1 vol. of DNA.
- Vortex + pulse spin.
- Incubate for **5min** at RT.
- Move tubes to magnetic rack and wait for **2 to 5 min**.
- Remove and discard supernatant without disturbing beads.
- Do not remove tubes from magnetic rack and add **200  $\mu$ l of 70 % ethanol** without disturbing beads (use freshly made 70% EtOH to ensure accurate concentration.)
- Wait for **30s** (leave cap open.)
- Remove and discard supernatant without disturbing beads.
- Add again **200  $\mu$ l of 70 % ethanol**.
- Wait for **30s** (leave cap open.)
- Remove and discard supernatant without disturbing beads.
- **Make sure to remove all traces of Ethanol** (use a 10 $\mu$ l micropipette if necessary.)
- Dry for **5 min** (leave cap open.)
- Do not remove tubes from magnetic rack and add **9 $\mu$ l** of buffer EB.
- Close cap.
- Remove tubes from magnetic rack.
- Vortex + spin pulse.
- Wait for **2min**.
- Move strip back to magnetic rack and wait for **2 to 5min**.
- Transfer the **9 $\mu$ l** of DNA to a new 1.5ml LoBind tube.

Qubit quantify 1  $\mu$ l of each library (dilution 1:2).

Check library profile on an Agilent Bioanalyzer with a High Sensitivity DNA Analysis Kit (load 1 $\mu$ l of library dilution 1:2).

## **7. Capture of UCEs**

UCEs were captured on each pool using the probes designed by Faircloth et al. (2015) and synthesized by MYbaits®. Capture was performed with the MYbaits® kit following manufacturer's instruction (<http://www.mycroarray.com/pdf/MYbaits-manual-v3.pdf>).



## **8. PCR Enrichment of captured libraries and final clean-up**

At this step of the process we have obtained libraries and Streptavidin beads mixed in 30  $\mu$ l of 10mM Tris-Cl, 0.05% TWEEN®-20 solution (pH 8.0 – 8.5).

Here we want to release the bead-bound UCE-enriched library from the baits and amplify the resulting fragments.

PCR enrichment of the captured fragment is performed on beads with the following mix. We performed 2 PCR reactions for each pool of samples.

| <b>Post-capture PCR Master Mix:</b> | Final concentration | x1          |
|-------------------------------------|---------------------|-------------|
| H2O up                              | -                   | 5 $\mu$ l   |
| 2X KAPA Hifi HotStart ReadyMix      | 1X                  | 25 $\mu$ l  |
| Primer F (10 $\mu$ M)               | 500nM               | 2.5 $\mu$ l |
| Primer R (10 $\mu$ M)               | 500nM               | 2.5 $\mu$ l |
| Enriched Library (on-bead)          | -                   | 15 $\mu$ l  |
| Master mix to add to each well      |                     | 50 $\mu$ l  |

With

Primer F = AATGATACGGCGACCACCG\*A

Primer R = CAAGCAGAAGACGGCATAACG\*A

(synthesized by IDT (Integrated DNA Technologies, Inc.), HPLC Purification, \* = Phosphorothioate Bond)

| <b>Program:</b> | 14 cycles  |              |           |           |                 |          |
|-----------------|------------|--------------|-----------|-----------|-----------------|----------|
| Step            | Activation | Denaturation | Annealing | Extension | Final Extension | End      |
| Time            | 2min       | 20sec        | 30sec     | 45sec     | 5min            | $\infty$ |
| Temperature     | 98°C       | 98°C         | 65°C      | 72°C      | 72°C            | 10°C     |

### **Remove Streptavidin beads:**

Pool the 2 PCR products obtained for each pool of samples in DNA LoBind tubes (1.5ml.)  
Move the 6 tubes to a magnetic rack and wait for 2 to 5min.  
Transfer supernatant to new tubes.

### **Final Cleanup** (Agencourt AMPure XP Purification system (Beckman Coulter))

Remove Ampure beads from fridge. Make sure they are at room temperature (RT) before use.

- Vortex Ampure beads.
- Add 1V of Ampure beads for 1V of DNA (ie 100  $\mu$ l of beads for 100  $\mu$ l of DNA.)
- Vortex + pulse spin.
- Incubate for **5min** at RT.
- Move tubes to magnetic rack and wait for **2 to 5min**.
- Remove and discard supernatant without disturbing beads.

- Do not remove tubes from magnetic rack and add **200 µl of 70 % ethanol** without disturbing beads (use freshly made 70% EtOH to ensure accurate concentration.)
- Wait for **30s** (leave cap open.)
- Remove and discard supernatant without disturbing beads.
- Add again **200 µl of 70 % ethanol**.
- Wait for **30s** (leave cap open.)
- Remove and discard supernatant without disturbing beads.
- **Make sure to remove all traces of ethanol** (use a 10µl micropipette if necessary.)
- Dry for **5 min** (leave cap open.)
- Do not remove tubes from magnetic rack and add **25µl of buffer EB**.
- Close cap.
- Remove tubes from magnetic rack.
- Vortex + pulse spin.
- Wait for **2min**.
- Move strip back to magnetic rack and wait for **2 to 5min**.
- Transfer the **25µl** of DNA to new LoBind tubes.

## **9. Final quantification and equimolar pooling prior to sequencing**

- Qubit Quantify 2µl of each.
- Check library profile on an Agilent Bioanalyzer with a High Sensitivity DNA Analysis Kit (1µl undiluted library).
- Perform KAPA quantification.
- Equimolar pooling of the 6 libraries.

### **References cited:**

Faircloth, B.C., Branstetter, M.G., White, N.D., S.G., B., 2015. Target enrichment of ultraconserved elements from arthropods provides a genomic perspective on relationships among Hymenoptera. *Molecular Ecology Resources* 15, 489-501.

MYbaits® kit, Instruction manual: <http://www.mycroarray.com/pdf/MYbaits-manual-v3.pdf>

NEBNext® Ultra™ DNA Library Prep Kit for Illumina®, Instruction manual: <https://www.neb.com/-/media/catalog/Datacards%20or%20Manuals/manualE7370.pdf>

### Additional file 3

Adapters (Ultramer Oligos, TruGrade synthesis, Standard Desalting) were synthesized by IDT (Integrated DNA Technologies, Inc.) /5Phos/ = 5' Phosphorylation; \* = Phosphorothioate Bond, F=forward, R=reverse).

Adapter were hybridized as follows:

#### 25 $\mu$ M oligo preparation:

- Thaw 100 $\mu$ M oligos. Vortex and spin well.
- Pool each pair of oligos (F/R) in DNA LoBind tubes (1.5ml) as follows:

|                | Initial Concentration | Final Concentration |
|----------------|-----------------------|---------------------|
| P1 F or P2 F   | 100 $\mu$ M           | 25 $\mu$ M          |
| P1 R or P2 R   | 100 $\mu$ M           | 25 $\mu$ M          |
| AB Buffer      | 10X                   | 1X                  |
| Ultra Pure H2O |                       | QS 100 $\mu$ l      |

- Vortex and spin well the oligo's pools and split each pool in tow PCR tubes (0.2ml)

#### Adapters hybridization:

- Place the PCR tubes in a thermocycler:

| <b>Program:</b> |                 | 15 cycles (with -1.7 $^{\circ}$ C/cycle) | 40 cycles (with -1 $^{\circ}$ C/cycle) |                 |
|-----------------|-----------------|------------------------------------------|----------------------------------------|-----------------|
| Time            | 2min            | 1min                                     | 1min                                   | $\infty$        |
| Temperature     | 95 $^{\circ}$ C | 95 $^{\circ}$ C                          | 69 $^{\circ}$ C                        | 10 $^{\circ}$ C |

- Vortex and spin well the tubes.
- Qubit quantify 2 $\mu$ l of diluted adapters (1/20e.)
- Adjust adapters concentration to 1.5 $\mu$ M if necessary and make aliquots.
- Store the aliquots at -20 $^{\circ}$ C.

Adapters (1.5µM) were stored in tube strips for usage comfort.

| #id     | barcode | sequence                                                                  |
|---------|---------|---------------------------------------------------------------------------|
| P1-1_F  | AAGTG   | AATGATACGGCGACCACCGAGATCTACACTCTTTCCCTACACGACGCTCTTCCGATCTAAGTG*T         |
| P1-2_F  | ACAAT   | AATGATACGGCGACCACCGAGATCTACACTCTTTCCCTACACGACGCTCTTCCGATCTACAAT*T         |
| P1-3_F  | CTAGA   | AATGATACGGCGACCACCGAGATCTACACTCTTTCCCTACACGACGCTCTTCCGATCTCTAGA*T         |
| P1-4_F  | GATAG   | AATGATACGGCGACCACCGAGATCTACACTCTTTCCCTACACGACGCTCTTCCGATCTGATAG*T         |
| P1-5_F  | GCCTC   | AATGATACGGCGACCACCGAGATCTACACTCTTTCCCTACACGACGCTCTTCCGATCTGCCTC*T         |
| P1-6_F  | TGTGT   | AATGATACGGCGACCACCGAGATCTACACTCTTTCCCTACACGACGCTCTTCCGATCTTGTGT*T         |
| P1-7_F  | GTATT   | AATGATACGGCGACCACCGAGATCTACACTCTTTCCCTACACGACGCTCTTCCGATCTGTATT*T         |
| P1-8_F  | CGGAC   | AATGATACGGCGACCACCGAGATCTACACTCTTTCCCTACACGACGCTCTTCCGATCTCGGAC*T         |
| P1-9_F  | AAACAA  | AATGATACGGCGACCACCGAGATCTACACTCTTTCCCTACACGACGCTCTTCCGATCTAAACAA*T        |
| P1-10_F | ACGTCA  | AATGATACGGCGACCACCGAGATCTACACTCTTTCCCTACACGACGCTCTTCCGATCTACGTCA*T        |
| P1-11_F | CGTCTC  | AATGATACGGCGACCACCGAGATCTACACTCTTTCCCTACACGACGCTCTTCCGATCTCGTCTC*T        |
| P1-12_F | CCCAAA  | AATGATACGGCGACCACCGAGATCTACACTCTTTCCCTACACGACGCTCTTCCGATCTCCAAA*T         |
| P1-13_F | GTTCCG  | AATGATACGGCGACCACCGAGATCTACACTCTTTCCCTACACGACGCTCTTCCGATCTGTTCCG*T        |
| P1-14_F | TGCCCA  | AATGATACGGCGACCACCGAGATCTACACTCTTTCCCTACACGACGCTCTTCCGATCTTGCCCA*T        |
| P1-15_F | TTGGGC  | AATGATACGGCGACCACCGAGATCTACACTCTTTCCCTACACGACGCTCTTCCGATCTTTGGGC*T        |
| P1-16_F | TACGAG  | AATGATACGGCGACCACCGAGATCTACACTCTTTCCCTACACGACGCTCTTCCGATCTTACGAG*T        |
| P1-1_R  | AAGTG   | /5Phos/CACTTAGATCGGAAGAGCGTCGTGTAGGGAAAAGAGTGTAGATCTCGGTGGTCGCCGTATCAT*T  |
| P1-2_R  | ACAAT   | /5Phos/ATTGTAGATCGGAAGAGCGTCGTGTAGGGAAAAGAGTGTAGATCTCGGTGGTCGCCGTATCAT*T  |
| P1-3_R  | CTAGA   | /5Phos/TCTAGAGATCGGAAGAGCGTCGTGTAGGGAAAAGAGTGTAGATCTCGGTGGTCGCCGTATCAT*T  |
| P1-4_R  | GATAG   | /5Phos/CTATCAGATCGGAAGAGCGTCGTGTAGGGAAAAGAGTGTAGATCTCGGTGGTCGCCGTATCAT*T  |
| P1-5_R  | GCCTC   | /5Phos/GAGGCAGATCGGAAGAGCGTCGTGTAGGGAAAAGAGTGTAGATCTCGGTGGTCGCCGTATCAT*T  |
| P1-6_R  | TGTGT   | /5Phos/ACACAAGATCGGAAGAGCGTCGTGTAGGGAAAAGAGTGTAGATCTCGGTGGTCGCCGTATCAT*T  |
| P1-7_R  | GTATT   | /5Phos/AATACAGATCGGAAGAGCGTCGTGTAGGGAAAAGAGTGTAGATCTCGGTGGTCGCCGTATCAT*T  |
| P1-8_R  | CGGAC   | /5Phos/GTCCGAGATCGGAAGAGCGTCGTGTAGGGAAAAGAGTGTAGATCTCGGTGGTCGCCGTATCAT*T  |
| P1-9_R  | AAACAA  | /5Phos/TTGTTTAGATCGGAAGAGCGTCGTGTAGGGAAAAGAGTGTAGATCTCGGTGGTCGCCGTATCAT*T |

|         |        |                                                                          |
|---------|--------|--------------------------------------------------------------------------|
| P1-10_R | ACGTCA | /5Phos/TGACGTAGATCGGAAGAGCGTCGTGTAGGGAAAGAGTGTAGATCTCGGTGGTCGCCGTATCAT*T |
| P1-11_R | CGTCTC | /5Phos/GAGACGAGATCGGAAGAGCGTCGTGTAGGGAAAGAGTGTAGATCTCGGTGGTCGCCGTATCAT*T |
| P1-12_R | CCCAAA | /5Phos/TTTGGGAGATCGGAAGAGCGTCGTGTAGGGAAAGAGTGTAGATCTCGGTGGTCGCCGTATCAT*T |
| P1-13_R | GTTCCG | /5Phos/CCGAACAGATCGGAAGAGCGTCGTGTAGGGAAAGAGTGTAGATCTCGGTGGTCGCCGTATCAT*T |
| P1-14_R | TGCCCA | /5Phos/TGGGCAAGATCGGAAGAGCGTCGTGTAGGGAAAGAGTGTAGATCTCGGTGGTCGCCGTATCAT*T |
| P1-15_R | TTGGGC | /5Phos/GCCCAAAGATCGGAAGAGCGTCGTGTAGGGAAAGAGTGTAGATCTCGGTGGTCGCCGTATCAT*T |
| P1-16_R | TACGAG | /5Phos/CTCGTAAGATCGGAAGAGCGTCGTGTAGGGAAAGAGTGTAGATCTCGGTGGTCGCCGTATCAT*T |
| P2-1_R  | ACCTA  | CAAGCAGAAGACGGCATAACGAGATCGGTCTCGGCATTCCTGCTGAACCGCTCTTCCGATCTACCTA*T    |
| P2-2_R  | TAGGTC | CAAGCAGAAGACGGCATAACGAGATCGGTCTCGGCATTCCTGCTGAACCGCTCTTCCGATCTTAGGTC*T   |
| P2-3_R  | CGTAC  | CAAGCAGAAGACGGCATAACGAGATCGGTCTCGGCATTCCTGCTGAACCGCTCTTCCGATCTCGTAC*T    |
| P2-4_R  | GTACGA | CAAGCAGAAGACGGCATAACGAGATCGGTCTCGGCATTCCTGCTGAACCGCTCTTCCGATCTGTACGA*T   |
| P2-5_R  | AGTCA  | CAAGCAGAAGACGGCATAACGAGATCGGTCTCGGCATTCCTGCTGAACCGCTCTTCCGATCTAGTCA*T    |
| P2-6_R  | GACTCG | CAAGCAGAAGACGGCATAACGAGATCGGTCTCGGCATTCCTGCTGAACCGCTCTTCCGATCTGACTCG*T   |
| P2-1_F  | ACCTA  | /5Phos/TAGGTAGATCGGAAGAGCGGTTTCAGCAGGAATGCCGAGACCGATCAGAACAA             |
| P2-2_F  | TAGGTC | /5Phos/GACCTAAGATCGGAAGAGCGGTTTCAGCAGGAATGCCGAGACCGATCAGAACAA            |
| P2-3_F  | CGTAC  | /5Phos/GTACGAGATCGGAAGAGCGGTTTCAGCAGGAATGCCGAGACCGATCAGAACAA             |
| P2-4_F  | GTACGA | /5Phos/TCGTACAGATCGGAAGAGCGGTTTCAGCAGGAATGCCGAGACCGATCAGAACAA            |
| P2-5_F  | AGTCA  | /5Phos/TGACTAGATCGGAAGAGCGGTTTCAGCAGGAATGCCGAGACCGATCAGAACAA             |
| P2-6_F  | GACTCG | /5Phos/CGAGTCAGATCGGAAGAGCGGTTTCAGCAGGAATGCCGAGACCGATCAGAACAA            |

## Additional file 4

```
#scripts tested on a Linux ditribution (Debian/Ubuntu)

#=====
#demultiplexing
#=====

#you must create a barcode.txt file in which you store the barcodes and the sample codes
#see example below (field separator = tab)
#column1 = sample code (avoid special characters except underscore)
#column2 = barcode P1 (forward read) + T (complement of the A added after shearing) [see additional file 2 for barcode sequences]
#column3 = barcode P2 (reverse read) + T (complement of the A added after shearing)
#column4 = reverse complement of P2-barcode (required for demultiplexing)
#column5 = term (required by the script)

sample barcode_P1      barcode_P2      barcode_P2_rev term
JRAS07752_0101 AAGTGT ACCTAT ATAGGT term
GDEL06009_0101 ACAATT ACCTAT ATAGGT term
JRAS07754_0101 CTAGAT ACCTAT ATAGGT term
JRAS07766_0101 GATAGT ACCTAT ATAGGT term
GDEL07010_0101 GCCTCT ACCTAT ATAGGT term

#ATTENTION IF YOU HAVE CREATED YOUR barcode.txt FILE IN YOUR PERSONNAL COMPUTER (e.g. excel ...)
#Remove potential troublesome end of lines characters before used

mac2unix barcodes.txt      #this will change format from Mac native to full UNIX
dos2unix barcodes.txt      #this will change format from Windows to UNIX
sed -i '/^$/d' barcodes.txt #this will remove extra spaces introduced by Mac

# A perfect match between the barcode sequence and the read is required to keep the read

#cd to datadir (in which the reads merged by FLASH are stored)

#use the barcodes.txt file to generate grep commands to find occurrences of barcodes at the beginning and end of each reads
#and redirect output to fastq files named after your sample codes

awk 'BEGIN{FS="\t";RS="\n"} {if (NR>1){print "grep -B 1 -i \047^"$2"\.*"$4"\047 input.extendedFragments.fastq > "$1"_fq"}}'
/AbsolutePathTo/barcodes.txt |bash

# remove barcodes from beginning / end of reads

awk 'BEGIN{FS="\t";RS="\n"} {if (NR>1){print "sed -i \047s/^\047$2//g;s/\047$4\$//g\047 "$1"_fq"}}' /AbsolutePathTo/barcodes.txt |bash
```

## Additional file 5

```
>locus0001
CGAACTCCGCAAGTGCAGAAATTTGATAGAGGTTAGTATATATAGACCCGAGTCGAGGAGTTATTTTGGAAAGTGTGTGCT
AGTGATGGCACAGCTCAACATATGATCGCTAACTAGTATAGATATATGGCAGATCTGCTCAGTGGGTGTTGTCACGTGGTCGC
TTCAAAGTAGCTTGTGCTCCGGCTCCCGATGCGCCTACAAAACGAGGCTGTCTCGTGGCCCTGGCACCTGATAGGCCCGCA
CGGTGAGTCTTACAGTCCGCTCCTCGAACTACCGCGATTCCAAATTTGGGGGCAATCGAATAGGTCAGACGAGGTAAT
GTCCGTTCCATATACAAGGCGCTGCAGTTCTGCAGTGTGCCCTTTTGTGCTT
>locus0002
CGAACTCTGTCTGTTTTCAGCGAACGGCTCGTACCAGCCGGGCATGGAGCCGAAGCGCCAGCGCACGGCCTACACGAGGCA
CCAGATCCTCGAGCTCGAGAAGGAGTTCCACTACAATCGCTACCTGTCCCGTCTGTCGATCGAGATCGCGCACACGC
TCGTCTGACCCGAGCGCCAGATCAAGATCTGGTTCAGAACCGTCGATGAAGTGGAAAGGACAAACAGCTGCCAAC
ACGAAGAACGTGCGCCGAAAAACGCAACGGCCAGCGCAACCGGCCAAGTCCAGCAAGTCTCGGCCAGGTCTCCGTC
>locus0003
CTGGAGCTCACCGAGCAAGAGTGCAGCAGTTCCGCCAACTGCCCGAGATGGAAGAGCAGCTGAAGCAGAGGATGGAGGC
TCTGACGAGGTTGAGGAGGCCAACAGGTACGCAAGGGAATCCATATCATACATCAAGCAACTTTTCTATCTATAA
TCATCGCTCCTCTCTATGAT
>locus0004
GCACACGCGGGGTAGGATGCCAGAGAAAGCAGATATATATCCACGGCCATGCGTTACGGGTTACAGTAAATCCGCCA
TGATGAATGTGTTGGCGGAATAAATCCGCAATGCACACCCCAACCCCTCTCTCTCTCTCGCTCGCTTCCCTCCT
CGGGTCTTTCTCCTCCC
>locus0005
AGAGTGAAGAGAGAGAGAGAGAGGCGCTCTTGTAGATTTACAGGTTACGCTCTCTCGTAACACCTCGTAAACTTGGCTT
AACGACTTTAACCGGGCTAACTGCTTCTCTCTGCAATCAAACCTAACCTGCCCCCTACTGATGCTTGGCGCTCCT
TCTTCTATCTCTCTT
>locus0006
TAGCAGCAGTAGTATAGCAGGCCAAAGAAAGGGTGGCGGGAGGAGGAGGAGGCCAGGCGCGCTGCACCTCATAAAC
TTAAACCTAATTAACCGCGCTACGGCTACTGTTGCACGCGCTGCGCGGCTCTCTCTACCTATCCTCTCCGTGT
GTATATGCGCGGTATG
>locus0007
CAGTAACGCGCTGCTGGTGGGGGGTTCAGCAGCACTACTTTCGCCGGCGTAGGAAACGCGCGCGGTACTCGTGACGAAT
TCAATTTGATTTGGTCTTAAAGCATAAACCCTCCCGTTGGCACCTCGCATCTCTGCTCCAGATCCGCGTCTCTCTCG
CGCTCAGTGAGCGCCG
>locus0008
GAAAAAAGCAGCGAAGTCAAACGTTACTGACAATGACATCGGTTACATTTACGAGGCGGTGAAGGATAAAGTGAACCC
TTGAGGTTGCATCATCGTCACTTTAAATCCCGTTACTCGCTCGTAAAAGTCTTTGACGACTCTCGCGGAGCTGCTGCT
GCTGCTTCCACTCTGGC
>locus0009
GCCGTCGCGCTGTCTGTGTGTGCGTGCAGCGCTGCCCGGGTAGTACGCGCGGTTCCGGATAGGGGGCTATAGTACCTTCA
GCATGGCCATAAAGGATTCGTCGACTACCGAGAAGTACGCAAGAAACGCGCTTCAACACCTGACGGGACGAGGCCAC
GGAGAGGCTCGCTCGCT
>locus0010
TGTGCTGTGTGTGTGTGTGTGTGTGTGTGTGTGTGTGTGTGTGTGTGTGTGTGTGTGTGTGTGTGTGTGTGTGTGTGT
TAAATAATGGCGCATTAAGCTTTTTCATTCGCGCTGCCCGCGGAGAGAGTGGCGCGCATATTCCGCGACGAGCATTACC
GCGAGAGAGTGTGTGT
>locus0011
AGAGAGCGAGTGAAGTGAAGTGAAGTGAAGTGAAGTGAAGTGAAGTGAAGTGAAGTGAAGTGAAGTGAAGTGAAGTGAAGT
CGGCGCGCAGAGCTGCTTTATTAAGTCTGCTCGCAAAATGCTATCTTACGACTCCATTCGCGCGGAGCGCGCTCTCTG
TGTGTCGCTGTGTGTGT
>locus0012
TTGCCTAAGTACATTACAACGTAATGGCGAATCGGCGACGCTCTCTCTCGCTCTCTCTCACCCGACATTTATATGC
TATATTTTACAAGGAAATTCGTTTTTCAAGTGGCGCTCTCTGCTCGCGGCGAGCGCAATTTCCCTCGCGGAGAAA
AGGGGTTCCTCTCTGT
>locus0013
CGCAGCTGATGTTTATGCAATTTATGCTGAATTTATGTCGCGCGGGCTTTAGCAATGTTTATGCTGATTTACGCTTTGT
GCTATCTGCGCGGACACATTTGCTCCCGAATTTATTTCCGCACTCTCTTTCGATATATACGTTCCGCGGAGAGGGAGT
GTGAGGTTGAGGGCTTT
>locus0014
CGCGGAGGCGGTCGCATTTTATGCGCGCTGGCATCGGCTCCGCTTTACGCGCTGCTTCTGTTTTGTGTAGTCTTTCGA
AAATTTGATGTTTGTCCGCGAGATTTACTGCGCATGCGAGGCGCGTCTTTCGCGAGGCTGCTGTTGCACGAGCTCG
GCAATATCGTGAATTTACA
>locus0015
CGGCGCATGTCGGTGTATACGCAATCGGTGGGAGCCGTTGGCGCGCGCGGGAGTGAATTAATTAATATAATTAG
CTGCGATTTGCATAGATAGCCGATAGAGACCGGACGCGCTGATAAGCGCATAAAGCTATGATGTGTGCACGCGCCGA
TATATACCGACGAGAGA
>locus0016
GGTCTCGCGCTCTTGGTGTGTTTTCAGCGTCCACTGCTGATGACCTCAGCGACATGCAGCAGCTCAAATAAACGCGATC
AAAAAGAGCACCCGCGTACTACTGAGCAGCTACAGCGCCGCTGCGCGCTACGCGCGCCACCGAGCAGCGCCAGCC
TACCGCGCGCGCAGCT
>locus0017
ACGACGCGGAGAGACTGAAAAAGACTGCGGAATGCGCCAGCGCGGCTCTGTGTCAACCCCTTACCACATCAACGTCTC
CGTCCGGAACTCGATCTCTACCTCGCACTTTATTAACAGCCACGGTAACGTAATATATGCAAGTTCCGCTAACCC
TCGCATCATCGTCTGTC
>locus0018
CAAAAATCGGCGCGGACCGCGCTCGATTTCTGTCGCGAGGCTTCTAGCGTGGTAAAGCTGTTTTCGCGCAATTTCTTGT
TTCCATTAGGTTGGCGCGCTCGGGCTGAATCACCCTGCTGAGCGCTCGAGTACTTGAACCTTCGACGCGAGAAAT
GTAAGGGGATTTTGT
>locus0019
GGCTCGCGCGATGAACCTGTCGCGGCTGTGTGTGTGTGTGTGTGTGTGTGTGTGTGTGTGTGTGTGTGTGTGTGTGT
CGCCAGATAAATACAATATAGTGCCTACTCTGCGCTGTGATTTAATTTAACTTTGCCCGGACGACATCCGCTAAC
TCGCGAAGAAGCTCGTA
>locus0020
TTACCGGGCGGGTGTCTGCTCATGGGCTACGTGGATCGCACGGGCCAAATCCGAGTTTTCTGCTGCACTGGCTCTC
GCTCTCATCGACTACTCGTAGTACTCGAGGATATGCTAATGGCCACGTTCCCTTGGGCTGCTGCTGCTGCTGCTGCT
GCTGGGAGTCTGCTC
>locus0021
TCGCACTCACCGCATACACGCTGGCTCTAATGGTTTCGAGAGAGCGCGCTGAATTTATGTTTACATGCGAGATGCAAA
TGCTGCCATATCGTAAAATATACAACCTCCGCGCTGTGGGAACATTTATGTTCTCCAGCGTCTTCTCTCTCTCTCC
TTCCGCTCCTCCGTATAT
>locus0022
CGGCGCATCTGTCAAGCAGAGAGAGGAGCGCGCTTTTTTCGCGACTCGTTTTATTTCTGCTGCTCGCATTCAAA
GGCAGCACTTTAATTTGCATGCTAAGAGAGCAGCGCGAGCGCGGCTGGGCGGATTTCCATTTAAACTCGCAAAATGGC
GCACAGCGGTGGCGGG
>locus0023
TTCTTCTTCTTCTTCTCGGACCTTCGCGCGCGGCTTCTTTGATCTCGAGGCCAGCCCCCTTTTTTCATTTTTTCACT
CCTTAAAGGAGATGCAAAAGTGTATTGTAAGTGGGAGCAAGACCAGCTGTAGGTGAAGTGGCGAGCGGTGCTC
AATTACAATTTAAGG
>locus0024
CAAAAATTTTATTTAAAAAATAAATACGAAAACGAAAACGTCGGCAGAGTGGTGTGCTCCCAACAGTTACTGTGTGG
CAGTGGAGCCTGTATCTCCGAGGACCGCTAAATCGCCCTTCTCCCTACACCGCACGTCACACCCACCCGATAGATTAC
```

```
ACTGGCAAGCCACTTGC
>locus0025
TCTCTCCGCTCCTCTGCCTCTCTCTCTCTCCGCTGCCGCTGCCGCGCTCTGCCCTTAGGGTCCAGACGGAACGCTTT
TAAATTTATTTGACAATCATAAATTTGAAAAATAAACCTTATATTTCTCCGGCCGACTCTCTGCATCTGTGTAGGCTCC
CTCGCGGTATGTGCGGCCG
>locus0026
ATTATCATAAAGCGGCTCTCGAGCGCACCTCTCGCTGACCCCGCTCCGAGACACCTCACGCTGACTAACTAATTTTCATT
CCGCAAGTCTTTAATTTAGTATTCGTCCGCGAGAAACGAAAGCGGCACTTTTTCACCTTTCGCTCCGAAAAAGAGAGAGC
TTTTTGAGGTAGGTTGA
>locus0027
TTTTGCTTCTCACTTTTGTAAATCGATCGGAGCAGTGTATGTGGTCTAAATTAATAGCAGGGCTACCTTGGAATAGTT
CACGTTCTTCTTGCAGCACAATATAAACGTCGAGATACACGACACGCTTCTCTCTTTCTCTCATTTCTCGCGAGCA
CACAAATATCTATATAT
>locus0028
TTCGTGTTTTTATATTTTGTATATAGTTATATAACCATTTTCCCAACGACTACACACTAAATAGTTCAAATTTTTTG
CACTTTTTACCAACAACAACCTGGATTGTTGCGCGAATTTCTTGAGCGCCATTTCTCTGTAATCAAACCTGCATTCTGT
GCTTGTCACTGTACCGG
>locus0029
CAGCCAGCAGCTCGGCTCTTGCATATATGGGCAATAAACGAAACGCGGCTCTCCGATTGGTCCGCGGCGGCTGCCGG
CTAGATCTTCCAAATGCGGCTTCAAACTGCAGATATCGCGACGCGGACACAGCAGCCGCTATATCTCTATAGCTGAGCGA
GCTCAGCGCTGTAGGTG
>locus0030
GATCGAGCAGCGGGGAACAGGTATTTCCCGCATTGAAATAAGGTAACGTCGCGATATGAAATATGCCCTTTGTACAAC
TTGATAATCCGTGGTTACCATAAATCTGACTGATTATCCGCGTGTCTATTTATAAGCCCTCTCTCCCTCTCTCCCTCTC
ACGCGCAATGCGGCA
>locus0031
AGAGAGAGCCGCTGTAGCCAGAAAGCAATGGGACGTAGGATTCGGCTGCCCTCGCTCGGCTCTGTGTCAATAGGCTCG
ATTTCCCTTTCAAGTTCTCACTCTTTTTGTGACTCGGCAATTTGTCGCAAGGGGACGAAACGAGCGGCTACTGAAAGT
CGTGGGTGGCGGGCGG
>locus0032
GGAGACAGAGCGAGGATAAAGCGAGAGGGAGAGCGAGAGAGAAGCCTGCTGCGGGATGGATGTGCGCGGATTTGGTTTC
CAATCATGGGACGACGCGGACGCGCTCTATCGAGCGAGCCAAAGGCCGCTCTACAGCTCCCTCTCTCGCTCTTTTG
CTTGGCTAGCGCTGCT
>locus0033
AGAGGAGAGAGGTAGAGAGGTAGAGAGCGCTCCGCGAGAGTACAGGAAGGGTGTGCAATGCGGGGACACTTGAGGT
GAATCTTTTCGGAATGGTTCGGTAGATGTCTGGTTGCTCTGCGGACTGCAGCCACCGCCGACGCGGCTGATATCGACC
TGCCCCCCCCCTACCAC
>locus0034
TAATAGCCTACGAGCTCCAGAGCGGCGAGTGTGCCAGTGTGTCGTTGGCGAGGACAGCTGCAGCCCTGCTGGACCTG
GACCATGGCCGCAAGCTGAGCAGCCGCGCTCTCATTCAGGCCCCACGACGACGCTCCAACAGCAACAGCAGCAACAGT
TGTGACCCCTTCCGCGA
>locus0035
TTGACTGTCCGGCTGATGTATAGCAGCATAAGAGATGTAGTCAGATCAGGTTCCCTCATGACACCCGTTCTTTCTTA
CGATAAATCTCTCGGAAATGTAAACCTGCGCCGCGCGGACCCGCGAGCGACCCGCGGACAAAACGAGAGATAACCGA
GGTACGAGTGTACGGC
>locus0036
AGGAGGAGAGAAAGATAAGACCCGAGAGATAGTCCATTGAGATCCGAAAGGGTGTGATGAGCCTCGCTCGCATCCTTTAA
AATGGAAATAAATGTTCTTTCACTCTCGAACTCGAAATGATGACTCGACGCTTTCAATATTTGGGAAACGAGAAATC
GGTAAGTCAATGGCTGAGAG
>locus0037
CCCAGCTACACACGGAATTTTGTGTACAAAGTGTGAGCGAGGAGAGATATCCCTCGCTGGAGTGTACCCACCG
TGAACCGCCCGCTAAACAGTGCCTTAACCATGATTTACGAGCCGACCCACCTCTATTAATATACAGCGCAGCG
TAGGCCCCCGACACCCG
>locus0038
CAGGCAGTTATCTGCAAGAGGCGAGGCTATGTTTCGCTCGTGGCAGTGCAGCGGAGCGCGGCTGTCCGAGATAAT
CCGCGGCTGATTAAGACCATAAATCCATCGCGGATTAGTATGACGACCGCTGAGCGGACGCTCTCCCTCTCCCTCTCC
TCTCTTTCTGCGGATA
>locus0039
GCAGCGGTTGTTGTTCTCCGAGGAAAGCCTCCATCACCTGAGGAGGAGGAAAAAGAAATAAACCAAGGCATG
ATGTCCAGCTGAATCTTGGGCGGTTTGGGGAACCACTACACGGAAGAACTCGCCCTAGGAGGATCGTGGTCACTG
CAGAGATAAAGACAGC
>locus0040
TCACGTATAAATAACTGCCGAAAATTCGAGGTCATCGGCGTAACGCGAGCGCAATCCCCCGAAAGAAAGAAATCGCGG
GCATAATTAGCGAATGATTTGATCGATGCGTGTGCTCTCTTAGGTAGCTATGCATGCGAACTTTCTCTCCGCGGCTCTT
TCTTCTGCTGTTCCGA
>locus0041
AGTCCCGAGAGCGAGCGGAGAGAAAGAGAGAAAGAGTATAAGGGGCGCTGATGCTGCGGTTTCTATGGTTTAA
TTGGGCGGAAATCATTTCCGATGCAATGCGCTCGGGATGACAGAGAGGGGAGGGTGGGGGGGGGGGGTGAATCA
TCGTAAGCGCGCCTT
>locus0042
CATACATAGAGCAGCGGAGAGGGTGGGAGCCGCGTATTCGCGTCCGATGAAACGCTGGCTTCTCGTGGCAGGAG
AAGTTAATATAAGCGATACCAATCTCCGAGCTTATGTGTGTGTGTGTGTGTGCGCGCCCACTGGGGGGAAGCCC
TGACAGCCAATACCAC
>locus0043
GTCGCTCTTTCTGCGGCTGCTGCCGGGGAACAACGCGGTGAGCGCAAGAATAAGAGAGAGGGCTCAGAGCCAATG
ATCATCGCATGCATTTAAATTTGGTTCAATTAAGCCCCCGAGCTGCCGACGAGTACAGCCCGCTTCTCTCGCTC
GCTCTGTTGTATAT
>locus0044
CGGTATTTAATTAGGCGGACGCTGGCGCATCAGGAGCGGCGTCACTGAGTAAGGCATACGCGGCCCCGTGCAGCCA
CTGTGCCACTGACGGCTCGCTAATTTGCTCGCTCTCCCTCCCTCCGACCACTTCTCGGCTTCTCTATAGTCTGCCGCT
GCTGCGCTGCTGCTG
>locus0045
CGTCTGCGCGAGAGAGCGGGGTCAGAGAGCGAAAAAGAGAGAGAAACGAGGACAGTTCGCGGGCGCTGATGCGAC
CACAAAGGTTGCAATTTATGCGGCCCTCCGCAATCACACGCAATTTGCGCGCTATTTGACCCGATGGAACACTCACCTC
TCTCTCTCTCTCTCT
>locus0046
TTTCCCGAGCGAGCGGAGCGGCTGCGGAGGGGTAAGGGGAGGCAAGCTTTATATAATGATCCAGATATATTAT
CGGACGTGACCGAAATGCTGTCAAATAACTCGGATATTGGATCGAAGGAGATTGCGAAATGCCAGCTCGTGTCTCTCTC
TCTCTCTCTCTCTCTCT
>locus0047
GCGCGGGGCAAGGGCAGAGTCCGCGAGTGGTGTGACTCCACGATGGCTCTCTCATTTTTTACTTTCAAATAA
CATGACGATGCTCATTTTTCTGACTCGTGAAGAAATTTTCAGAGTACGCTCAACCGAGCGCCACGAGGCTTTTTTCG
ACGCGACAGACAGAACTAC
>locus0048
TGCAATGTGCGGCGTGAAGCAAGGAAAGATAAAGGATAGAGGAACAGTAGCGGCAATCAAGCCGACATCGGACAGT
GACGAATGCCGCTATCATCGGATATCATAGCCGACTAAGGTGCTCTCTGCTCTCTCTGCTGCTGCTGCTGCTGCTG
TCTGCAATAAACACG
>locus0049
GCCCCAACGGGTAATGGGCCGAGAGAGAGAGAGTGGCCCGGCTCGGCGCTATCTACGTCATATATCGTGGTTA
ATTAATCGTTAATGAACAGTAGTTAGCCGCGATGATTTGTATATTTTATATATCCGTAACCGGGAGAGTGCATAAG
CTGTACTCTCGAGCAT
>locus0050
CATGTATATAAGGGAGGACAGAGGACTGCGCTGCGGCTGTGCGCGCTCGCTCATTACTGGATAATGGTTATTTTCGAT
```





```
AATTTAGCCGCGAGCGTTTATGGCATTGTTGCGCGAGTGGGAGAGAGAGAGAGAGAGAGACGGCGCTTTATAAAAC
CAATTCGCGGGTATTATGCAAGCTGTCAGTCCCATAGTTAAGTTATGGCTACGGCGTTCGCTGCGGCACAACATGCAT
TACCTTATACCTCCAGCG
>locus0077
GGGTTGAGGGGGAAAGTCGGGCAATTTATCAATCCACGAGCGGGAGAGAAGCAGACTTCTGGCCAGGCGGGTAATTTAAACA
GATTGATGCGAAGCCGACATGCCACAGTTCGGTGGCTCGACGCTTGAGTTCTGTAAACGCGGAGGAAACAAGCCAAACGCTGGC
GCGGAGCGAGCGAGAG
>locus0078
ACACACGCGGGCCATAAATCGGCGCGAGTGCAGGCTCGCGCTCGCGCCGCGCGCAGCTTACGGCTAGGAATTACCGGCTCGCAA
CTTGCGAAATATGACGGTCTCATAAATCCGAGTCCGCGCTGCCGACGCGGATCTGCCCGGGTGTGTGTTACCGCTGT
CTAGCACGTGCTGTGG
>locus0079
TAATAACTATCTGATGAGAGATAAAGAGAGAGAAGAACAACAAAAAAGATGATGTCTACGATACCGATGCTATTCTGA
GTACTGAGTCCAGTCTTTCATGAGGATTTCTCTGGCAGGTGAGGATGACGTGACGTGGTGCACCTATAATGCAGAG
AGCGATTGTACAGTTAC
>locus0080
ACGGCGCGCAACGCGGAGTGCGCCCTCGTGGAGTCTCGAGACAGGAGTCCAAAAAGCGAGCAAGCTGCGCCGGA
AGGGGTAGCCCGGGCTTCTCGCGAAGGCTCAAGATTTGCGACGCGAGCGGCTCGACCTACGCGCCAGTCCGAA
GCCAATCGGAATTTGGCTT
>locus0081
TTTTTCGTATCCGAGCCGGTGCCTGTTGGCTCGGGCGGGCCCGAACTCGCGGGTCCACGGTGAAGAAATGGTGTG
GGTGCAGCCACCGCACTGCTGTAAACAGAGAACCAACGCGCGTAAATATCACTGCTCAATATCGATGATATGA
ATTATAATATAATGTGT
>locus0082
ACCTCCGACTCCGGTGTCTCATGTTGCTCTTGTAACTCTGCTTTCGCGCCGGGACTCGTTCCGACGCTAGAATGA
ACATTTGCTACTGCAAGCCTCATTAGATATGGTTCAACACAAAACAAGCAAATAAAACATGAAATAATAGTCTTTTT
TTTTCTTAACGAGACA
>locus0083
TACCAGCAGCAGCAGCAGCGGCTAGTTTCAACGAGATGACCACGGCAGTTCGTGAAATTAACAGATCTTGGCGGG
ACATTTCTTTGGTTATCTAGCTGTATGAGTTTGGTTGATCATATAAAGTAGGTACCGGAGTTGAGATCCTCGCCAT
ATCAACAACCAACATCGG
>locus0084
AAAGGACGTCGCTCATATTCGCTCTCATATATATATAATTTTTTTTTCTTTTTGGGAACGATACAGATACCCCTC
CGTTATGCTTGAACGTCAGAAAGCCGAGCAGTCCGCGGACGAGGCTCCGGGGTTGCCCGCCGACAGCTCTG
CCACACCAACAACAACA
>locus0085
GTACACTTTTTCATTGGATTGCGATTGAGCATTAAGAGCAGCGGGAGACTGTATCGAGGGCATTAGCGGCTATTAGCATT
AGGAGGCATCATCTCGAGTTAAACACTGCGTGGCGGGATTTTCGAAATCGCGCGCGCTCGCTACCCCGCGGGAGC
TCTTTTTTCTCGCTCT
>locus0086
AATATACTTTAAAGAATAATGAAAAAAAAAAACACTAAAAATAAACTAAACTAAAAATAACAACAGAGCCTGTGGCCA
GTATAATGAACAAGCACTGCCATGGTCTATAGGTAGATGAGCTAAGAAATCCAAATTTTAAGCAAAACAAAAAATCAAGCT
AGCTATCGAGGGCTTAT
>locus0087
ATATATATATATATTTTTATATATAAATTTGTTTTCAATAATATAAAGTGTAGGTACTTTTTATATAGTCTCTGTACT
GTCTTACGTATCACAGCCTGGGTGCTTCCGCACTGCCTTTTACGCTCTTCGCTTATCTAAGCTTATATTTTTTCCCT
TCTTATGCTTTTTCTAT
>locus0088
CAGAGTGTAAAGTTAGACTTGCAGTTCGAGTGCAGAGGAAAGTTACCTGCCGATACCTTAGCAACAACCTCTCA
TCAATGTACTGCAATAGACTCTCTGTTGGGAGAAATATGAAAATTAACAAATCACTGAAACGAAATCAAGGCTGCTGAAA
GAGCAGAAAATTAATA
>locus0089
AGCAAACTTGGCAGCAGATTGCGATGCTCGCGCATCTCATATATACACACGGAACGGAAGCTAACGGGAATCGAAG
GTGAATGCTCGGGCAAAATGCGAATTACGATATATACCGGAGCTTCGGAGGTGTAAGTGGCGTGTCTCTGTCTGCTGT
ACACGCGGACGAGACTC
>locus0090
AGCGGCTGCGCTACCCCTTCACCGCTCCGCGCGCTACCCGCGCACTCATCTGCTTTAGCCCGGAATTAATAAG
TTTTTTTCAACAAATACCATGATAATGCGCGACTGCGCGTGAACCTCGACGAGAAATGCTCTCTCTCTCTCTCTCT
CCCGTCTCTCGGTGGC
>locus0091
ATCTCCGCTCTCTCTCGGCTGCGAGCAGCTCTCGGACCACACTCTCGTTGCGCTGCTTTTTCTAGCGGGCAGTTT
TTCTATTAAGCTTCAATTTGTTCTTTTCTTTCGTTAATGCGTAAATGCGTCCGACGCGAGCAGCTCATCTCATCTAGTGCCG
CAGCGGCGCAGTCGCAGCAC
>locus0092
GAGAAACGCTGAGCGGGCTGGAGGAGAAATTTACATCGGAAGGTTGGCACCGATATAAAGGGGGTGATAATGATCT
TAAATTAATGATCCAAATGTTTATACGCTTGCAGGATTCATTTTTAATCCGCTGCTGCTGGTCCGATATAGTTGAAC
GAGCAAGAGAGAGAGAG
>locus0093
AAGTCGAGCGAAGCAGTGCAGGTCACCGTCCAGCAGCAGGATGCGATTAAATTAATTTTACTCCGCGAGACACTTAG
TTCCGTTGCTTTAAGCTCGTTAAATACGCTTCTCTCTCTCTCTCTCTCTCTCTCTCTCTCTCTCTCTCTCTCTCT
TGCCGCGCGCTCGTTC
>locus0094
TTATGTAGTCGTAGACTAGTTGATAAGCTGCGAGAAAAGCCAATTTAAGAACGCAACCGAAGTGTGCTCACCCG
TAGAGTATGTTTCAGCAAGGAGCAGGCAATGCCCTTTGCGCGCGTCCCGAGGACCGCGCAGGCGGTAACGGC
AACACGCGCAACAGCAG
>locus0095
CGTCCGAAAGATAATACAAACAAAGGATAATCCCGATACGGGACGAAATCCGAGCGAGGGCAAAAACTCTTAT
TTAAAAATGATTTTACCGTCTGGCTCGGCGCGAGAGCAGAGCAAGGATCGTCTCTCCAGCCCGTGGAAAGTTCCG
CTGCACTCCAGGCTCAC
>locus0096
CGCTATGAGCGAGATTAACCCGCTCACTCGATGGGCGCGCGCGGAGAGAGAGAGAGAGAGCGGCACCTTTAAAA
TGTATGACGTGGAACCTGFGATTTCAATCAACATTTAATCACTATATTGGTAAATACACGCGGAGGACTGGCGCAGT
TCCTGTCAATCGCATT
>locus0097
GTAAGACTATACCCGCGCTGAAGCCGCTTCTCTCTGCTTCGGGCGAGCTAATAGACTTTCGCGCTCCAAATGATTTCCG
AGATTTATGCTAACACGCGCATTGTTTCGCGCAGTCCGGAATATACGTGCGGCTGCTAAAAGCCCCACCGCCGCGG
CCGTTACTAGTACTCTC
>locus0098
GAGGGACACGTACGCTGCGCGCGGGGACGCGTCAATGTAAGCGGAGACTGTCTGAGCAAGATAATGCGTCCA
CCTACAACCAATCTATTAGCGCCATCTCTCTCTATTCTGTCCGCACTTACTGCTACTTACATCGAGGCCCTTCTC
GTCTCCGCTCTCTGCA
>locus0099
CGCGCATACTTTTTCTTCCGATGCTTCTGTTTCCCTTCCGAGCCCTCTTCTCATCTCTTTTTATTGCAAAAT
TGGACGTGAAAAATGACGCTTGAATTAATCTGGCGGATAAATTA AAAACGAAGGGTGTCTGCTGGCTGTGTTACCGA
CGAACAGCTGAACGCA
>locus0100
ACTCGGGAGAGAGAGAGACAGAGTGCAGCGGCGCGCAGCTATCCTCTACTACTTTCTGATTTCCGGATGGAATTAATA
TGCAGGAGATTTCAATTTGTTATATATGCTGCGAGCGCGCGCTACAACGAGCAGATTTTCTGCTTAGGTTAATCGAAT
ACGGGCGGACTATGCA
>locus0101
GAGACGAGCGCTGCTGCGCGGTGTCTGCGGCTCCGCTGTCTGCTGCTACGCTCATTCCCGGATCTTCAATTAATG
AACTCGGGTGCAGTGCATGTCAAATAAATATGCTCTGCTCTCTTACCATAGCGTGGTGGCTTCTCTCT
GGAGTCCCTCTGTACA
```

>locus0102  
TCTCGCTCCGTCTCTCTTTGTAACGAAGATTGTGTGTAATGTATGGCTGGCATTCCGACGACAAGCGTGACAAATTTGCT  
TTATTAGGTTGGCAGCCCGGGAGCCTTCCCACTTCGCTCTCTTTCGCTTCCTCGCTCTTCGACCTCACACGATACATG  
CTTCTCTTTCTCTACTCTC  
>locus0103  
TCCTCGCGTTGAGTCTATAAATAGTGGCCCGATGATGGAAGGCTTTAAACGAGATGAGATGGCCCCGTGACGCCAA  
TCAATGCATCCACTAAATCATGCTCTAAGCTGACGGGCGCAACGGCTCGTAGTTAACGCTGCCCGCCGCGCGCTG  
TAAGCGAGAGTCCCTGG  
>locus0104  
GGAGCTGGGAGACGGGAAAGAAACCGGGGCTGAAAAATCGCGGCTGGATATACAGCCAGCAGAAAGGCGAAGCAAGAA  
ATTGATATAGCATACGAAATGAATGCCCCCTTTCCTCTCTCTCCCCCTCGTGTTCGCGTTGAGTTCGACGCTT  
TGGCCGTGCACGTCTGT  
>locus0105  
ACACGGGGGAGGCATCGGGCAGTCTATAATATATACAAAAATGCATCCCCACAGCCCTCGATGAGTTGATTTGCTGCT  
TGTCGGATGCCAAACGCTCCGAACTCGTGCATTTATATCGCGTTGCATGCGCGCGCGCCCTTACGAATATATTGCT  
CCTTCTTTGTACACCG  
>locus0106  
AGGACAATATTTAGCGGGATAGCTCGTGTAGCGTATGTGTGTATATACAGTAGCATCAGGGCGACATATAAACATCAA  
TTCAATGATGAAATCTGTCAAATGAATTTCCGCCGGGAGCGGAGTGGCGGAAAGCCCTGGAAACGTGACGTGGCTGT  
CATTTTCTTCCCGCG  
>locus0107  
TGATCTATGCCCGGTATATCCACGAAGCGAGGCTATAGTTGTGCCCGGCTCCTCCGGGAATCTCCGTGACGTATGTG  
GCTACCTGACGAGAGAAAACAATCTTCGAGAATATATCGTTCGCTTCTCCATCTCTCTCTGCTACTGTCTGCTCGCT  
TCATTTATCCCGAAT  
>locus0108  
GCAGTTGAGAAATTTAGATATGTAACAGCGCCGCGCGCTCGCGTACTCGCGCGGCTTATAAACTTAGTTATGA  
ATGCCATTAACACTGTAAGGAAATGCATTAGCCCGCTCGCGGAGGAGATCGCCCCCTGTCTCTGCGCTCCC  
TCGAAACCAAGTTACAA  
>locus0109  
GCGCAGACGCGCGCGCGGAGCGAGCCGAAACGAGAGGCTTCGCGGCAAAATAAAATAAACGGCATCGTTAGG  
ATTATCATCTGATTTTAAATTTCCATTTCCAAATGATGCGCATTAGCTCCGCGCGCGCGCTAAAACCGTTTCTGGAT  
TTATTGCCCGAGGGCG  
>locus0110  
TTAGCTGGCTATATCACGAACAAACCTTAAAGCGGAGCGAGAGAGAGCGCTTTCGCTAGTGTGAGCGAGAGTGGCAA  
TATAGTTCCCTAATGCGCTTAAAAAATCTTAAAAGACGATATAAAGATGTGACTGGCTATAAGAGACAGGGCGGG  
CTGAAAGATAAAAAGGAG  
>locus0111  
AGAGAGAGAGAGAGAGAGAGCTTGCCTCGAAGTGTGAGCAAGGAGGAGTGTGAGGAGGCTGCGCTATGCAAAATTT  
ATCGCGGGCGATAATTTAAATGCAATTTCCGCTTCTATATCTTTCGTTATGCAAGGAGCGCGGAGCGGGAAACGCT  
TTCTCGGTATGGGAAG  
>locus0112  
CCTCTCTCTCGCTCTCGCTTACTCGCTCGTGTTCATGTAACAGTTAATCTAAATCCAGAGCAAGCAGCGATGTAATGT  
TATCGCGCGCGCAAGACTCATTTACTTGTAAACAGCCGCTTGGCCCGACCAACCAACCCCTCCGCGGAGCTGG  
CGTACATGCATGCACAC  
>locus0113  
ACTAATAAATAAATCAAGTACTAAAAAAGGACTTTTAAAAACGATTAAAAAATGGCAGCCACCCTGAGGCTGCCTG  
CCTCTCCCTCGCAGGTGGCGGAGGGCGCGGTAATCGAAATAGAAATCTTCGTATCGATAACAGTCACTCGTAATAGG  
TTCACTGTAGCCACCTCGATAATCCCGTAACCGTAATAGTGTGTAATCAATACTATAAAAAACACACATTAACAAATAGAC  
CCAAAATTTAGCCACCTCGTATATGCAATAACAAACAACAAAATGTTGTACGTGATAAACCGAT  
>locus0114  
AATACTGTCTGGCGCAGGCTGTGTAAAAAGTCAAGCTGTACGGGCACAGGGAAGAGACATGCTCACGATGGA  
GACGGACCTGAAGGGCGCGCCTGCACGCTCAGATGCCCGCACCCCGCACAGGGGTCTCGCCAAATGGGCCATCACG  
GGGGGTCTGCTCCCGCTAC  
>locus0115  
ATCGTAGCTGCACCGCCCGCGCTGCCGCGCAGTTAGCGCTAGCTCACCTCCGCCACTTCTATTCCGTTCCAGTCTG  
CGCGCTGAATATAAGTTGCGAAGGAGACGCGAATTAGCGTGTGCGCTACCTACGCTAATTCGCCCGCGCTGCGG  
TGCGGTGCGGAGCGTCT  
>locus0116  
CTGGCGCTGACCGAGCGTCCGACGCGCGCCCTCTGCCGCGCTCGCGTTCGCATGCCAGCAGCGCGCTGTCTATAA  
AGCATCGCTTATCATAAACGACGCGCGCTCGCGCGGTTTCTCGCGCCATCTTACCACCCCGTTTCTCTTTTCT  
CTCTCTCTTTCTCTC  
>locus0117  
CTTCTCTCTGCTGCGTGTGCGCACATTTACCTAACACAGCTCGGCCGAATGCTCGCGGCACGGAAAATGACTGTTTAT  
AAATAATTAGAGAGGTTTAAATTAACCTCCAGACGCGCGCGCGCCCTCTACTGTACTCTTCCAGTACTGCCCGC  
GCGCGGAGAGGCTTG  
>locus0118  
TTCAGAGCCGAGATCGGAGAAAGAGACGCTGGAAGAGAGAGAGGGCCGAAGCGCATCGACGGATGAGAATGAAAA  
GTAACATAACGAAACGTCGATCCATTAACCTGAAGTCTCGCTCTCTGCTTCGACCTCGTCTCTCTCTCTCTCTC  
TACAGTATTCTCCCTT  
>locus0119  
TTTCCTTACACCGTAGCAGCGCGCGCAGCGGCTCCGCGAACCAGCAAGCCGCAACCGGCTACTGCCTTGT  
TAAACGCGCATAGACCGCATTAATCGCTGATGCGCTAAACATTAACGGACTGAGCTCTCTCGCTCGGTGTCTGCGCT  
CTCTTTGTATGTGTAGC  
>locus0120  
CGCCTCGGAGAGCGGCGCGCGGAGAGGGGAGGTTATACGCTGCCCGCCCGCGAGTATTGACAGACGCGG  
AAAGATCGGATGTTTGGATGTTGAACCTTGGAGTGTCTGCTCAGCACTCGAGAGAGTGTGAGTGTGCGCGCTCTG  
CTCTATCTCTTATTTT  
>locus0121  
CGAGCGACAAGAGAGAGAACGGAAGGAGAAAGAGGCGGAAGCAGTGCCTGGGCTGAGGAAAGCCGCGGCTAAT  
AGGAGGAAATGAGTGTCTCGACAAATTTAAGGAGGATTCGGGATTCGGGGGATGAGGAGATCTCGCCCTCCCTC  
TCTCTCTCTCTCTC  
>locus0122  
GCGCATCTGCACAGTGTGTAAGAGAGAAAGAGCAGCAGCAGCAGCAGCAGCGCTGGGTTTCCGCGCGCTTGG  
AGCCACTGAACCACTCCGTGGTTCAACGATTCGATGCCAGTGCAGCTCAACTCGGGAGACACGACTCGGGCCAGACT  
GCATCGCGCGCGCGCG  
>locus0123  
CCCCCATCCCCCGCAGGCTCGCAACCGTCTATCTTCCAGGCGCGGAGCCAGCCAGCGGCTGCCAGGGGCTACGCTGTTA  
TTTCCGGTGGATGCTCGGGATCAATAGCTCGGAGAGAGAGGGGCTGAGGGCTGAGGGGTGAGCACGAGAGAAAGC  
AAACGAGGAGGAAAAA  
>locus0124  
CGCAGGGCATGTCTCCGACGAGAGAGCGCCCCGCGAGTGAACCTGCAGCGGATCCGCGCTCACGCTGGATTTAATTA  
ATGCAATTTAGCATCCATCCATCATCTCGCGCTGCTGCGTTTTTGGCGGCTAACGAGTGGAGCGCGGAGCGCGCAGC  
CCTGCGGCACTTTGATC  
>locus0125  
CTCTTGGCCCGTCTCATAGCGCGCGGCGCTGCTCCAGTGTCTCTCCCCCTGGCAATATCGGGCCGGTAAATAATTCG  
AATTTCTTATTACGGTAAATCCCCCGTGGACGACGAGTCTCTGCAACTGCGCGCGCTCGCTCGTTAGGGGAGAA  
ACGAGATGCCACCGCGA  
>locus0126  
AGCCGCGCTCGTCCCCGCGCTTCCGAGATCCATCCACGTGCATATATCAGGATTTGAGGATTTGTGCATAGCTGC  
CCTCACCTCAGTTATCTTAAATACATCTGTAACGACGCGCAAGCCGCGCGCTCGCTGCATATTCGCTCGTCCCCG  
CGACTCTCGGCGAGCC  
>locus0127  
CACTAGAGCGAGTGAGACGCGGAGACACCGGAGAGAACGAGCGCTCTTTCTCTCTCTGCTAACCTTGGTGGAGAA

TAACCCGCGTTCAATTCAAGGAATTATGACGCCCTATCTTTTCTCTGGCCCATCGCGCGCACACATTTCTGTTCTCT  
CTCCTCGCCACCGTCTG  
>locus0128  
TTTTATCGGTAATGTGAAAACTCCAAAAGCGCGGCAAGCCCTGCGCAAGCTCTACTGAGAAAAAGGCGCAACT  
GGCGAAAAGTCGCGCTTAAGTATAATAATTTTCAATTATATTTAGTATGAACTTTGTCAACAATAATTTTTTTTAA  
TCTTTTCTTATATCC  
>locus0129  
CATATAGAGATACACGTACGCGATATAACATATAGTATATAGTACACCTACAGACTGGTTGATCTCAGCGGATATGTAC  
ATTGCTTACTTAGAAGGTTAGCTGTAGTGGTACCTTTGGTCGCTCCATGGCGAGAGCTCGGCGCCCTCGTGCAGC  
GCGACCTGTAGCGGCT  
>locus0130  
TCTCTCTCTCTCTCTCTCTTTCAACTATGTATACCCGACACAGAAGCGCCTTAGAATACAGCCTCGTGTGCGGAATC  
CATTTGCAATAAACACCGAGATTAGAGGGCGGAGGTTGGGAAAGGAGGCAAGGAGATCATCGCCGTCCGAGGGCA  
CTTACGAGCTCGGGAAG  
>locus0131  
AAACGAGTGGGAGAAAAAGGAGCAGGAGGAGTTTCGCGAGCGAGCGAACTGCACGAAGAGTGTAAATAACTAAG  
GCTGATTGTTGGCGTGCTGACAGAACTTAAAAAGCTTCGACTATATCAAAAGGTTACTGCCCTCCGCGCGCGCT  
GTATAGTCTCTCTCTCT  
>locus0132  
TGTGCTCGCTCACACCCCTCGGCATCTCTCTCACTCGCTCGAGCCATTAAATAATACCCATATTGGACACAATTCA  
CCTTGAATTAACCGCGAGCGGATTGGTAAGCCCGGCAAAATTGACTTCAAAATTGACAATTATGAGTCTCTCTCG  
CGCGCCTCTGCACCCCT  
>locus0133  
CCCCGAGCAGCAGCAGCAGCAGCAGCAGCAACGCCGCTCACTCAAGCGGAATTAACTGTCCCGCTCTAGTTTGGCCGCGAT  
TCAAATTGAATTGACTATCGTTATGCATTTGGAATTCGCGGTGCGGTTGTGCGATTCAATCGATTTCGCGTCCAGAGAGCGC  
CGTAGCCGTCCCGCGTG  
>locus0134  
GGTAATCTCGACCTCGGTGATGCGATGTGACATTAAATCCCGTTGGCCCGGCTTTAACCAGAACAGCAGCACCCTAT  
AATAGCAAGTTGAAATCCAATCTCAAGTTTGAATAATCAATTCCGCGCTCTTACGGCTTTAAGAGAGAGAGAGAGA  
GAGAGTGAAGCGGAGT  
>locus0135  
GACGTTGGCTTTGGCCTACTCGTCCGTCTTTGCCCCCTCCCGTTAGCGGGTAGGATCGACGTTCCGTTATTCCG  
ACGCTTGTACTTATTTTTCTTCAACTGCTGCGCTGAAGTGAACAGAGAACACAAAGAAAGTTTTCATAGTATAA  
AAAAGAGAGAGAGAGA  
>locus0136  
CTGGCGCCGCTGTGTGCGCGGGGTGCAAAAATTCGACTTCCCTCGCGTGTACCTATTACTGAGACTATTATCC  
AATACAAAAAATCAAATAAGTATGCTAAGCTACGCTCCGAAGAGTCTTCAAGGAGAGAGATTTTTTCCATCTC  
TCCCTCTTTTCCGCTGCGAC  
>locus0137  
GCGAGCAGGATGCCTTTACGAGGGCGTCCGGTACGGACCGGGCTCGCGATGATGGGCTCGCGTCGCTGCGAGTACTGCT  
ACTGCATTTCCGGCGAGAGATGCATCCGCGCCAAGTGTGTTGCTCCCGCTGCCCGGATGCGCGCCACTTTACGGCGG  
CACTCTGCTGCCCCGT  
>locus0138  
ACGACATGACGATGATGATGTTGTAAGAGTAAACAAGTAGTAGTGTATAAAAACGCGCGCTCTTTTGTGCTC  
TACCTCTCTTGTCTCCCCACAAACGATAACTCGTTTACAACATTTTTTCTTTTTAAATACAAATCTCTATATC  
TTTCTTACCAAAGGA  
>locus0139  
AAGCAGCGCGCAGCGCGCTACGTACACCGTGTGGCAAAGCAGCCTCGCGCCGCGTTTGTAAAGCCTCGGATTCTGAGTG  
CCTTTGATACGTGTACTTGCACGCTAATTAAGCAACTAAGCTATCCGCTTCTCTCTCGTACGATATATAATGGCC  
TACGACACATAAAT  
>locus0140  
TACGTGCTTCGATGTCATTTGCGGTTATATGCTCCCATGTGCGACCAACCGATGGCCACCTTCTCTCGACGCGGG  
TACGTCAATAACCTTCCAGSTAATTTGACTTGTACATCACACTGAGAGCTGTTGCTTAAATGCTTTATTTATTTGTTAT  
GAATCATTTTATATAT  
>locus0141  
AGAAAAAATATACCCTTAACAACAGGTTTAAAGCAAGCTCTCAATCATCTGTTTATGATTTTTTGTGTTTACAGA  
ACGATAACGATCTTATCGATAACGATAATGCCGCGCAAGTGTTCGCGCCAGCGGTAGTACTTACTCTTTTCTCTTAT  
CTAATTTTTTTGAC  
>locus0142  
TCCGTATACAAAGTGAGAGAGAGAGAGAGAGATAGTAGCAAGAGCGGTTTCGCTTGGCGCTTGTATCCG  
CTCATGAGTTAACCACGGGGCTAAGTGGCGCGAGAGGGCGTTTGTACTTTCGCGTGGCGCTATATACCATATAT  
ATATATATGTATAAGGC  
>locus0143  
AAGAGCGGAGAGAGAAAAAGGTAATGGCCGCATCGAAGCTGTGATTATTCGAGTAGAATTTTCATGGAATGGAGTA  
AATGGGTTTGGAGAACAAATTTGCGGGCAATAGCGAGGTGATTGCTCATAAAGTCCCGCCTGCGACTGCAAGCG  
GCTCCGCTCTGTTAGC  
>locus0144  
TGCCGCTATATCTACTGTAACTCTCTCTCCCTCTTCTCCCGAGCTCGCGCACAGAGGCAATCTGTTATTA  
AATCAGCAACGAGAAAAATCCGTGCCGTATCTGCTTTACTGCAAGCGGCGCGCCGACGACGTTTACGGCAAAA  
ATTAAGCCACCTGCATA  
>locus0145  
GAGAGAGAGAGAGAGAGAGTCTGTTGGAGAGGCACAGGACTCGCATCCAAAGCAGACCGCTGAGCCGGGTTCAATTA  
TTTTCTGTTAAGTTTCTACAACCTCGGCTTGTGTCGTAACGTTTAAACGCGGACCGCCGGAATTTTAACGCG  
GAGAAAGGAGAGAGAG  
>locus0146  
GAATCGAATATAATAATAACTGTGTCGAGAGAGTGTGAATGTTTCGGAAGTAATTTAGTGCCTTGCCTCTGTGG  
GTAGCGTAGTTTCCCGAGACATGACCCATGCCATCGCAGGAGAGGACGTGGGACACTGTATCAGTCTTTCGCGTCCGCGAC  
GCGAGGGTAGCCCGG  
>locus0147  
AAACAGAGAGAGAGAGTACTAGTGGTGAACACTTACATTGCAAGTCTTAACTTGAACAACCTTTCCAAAAGTACC  
CTCTCCTAGGGTGGCCAGTACTTTATCTGCAATTGAAAAATAGATGTGAGTCTCTCTGTTCAAGGACCGCGCGCTCGAG  
CACTAGTCTCGGTCCTCCG  
>locus0148  
CGCGGTGACGGTATAAAGCGACACGACAACGCGAGACTTCATCCTCTTCCCGAAGTACTGCAAAATTTTGGGGCG  
TAAACAGCGACAAGTGTTCACAACTGCGCCCGGCTGCAAGGAGGACGAGTGGCATCAGCGAAAAGGGCCTCTCTCT  
GCACCTTCCCTGTATT  
>locus0149  
TTCTCTACGAGCTCGCGCCGTGCTGCTACTCGCTAATGGTTATGGTAATACCAGCGGCTGCCAACCTTAATGCGA  
GCAATGGAATACGAAATACAAAGTTTGTGCTGCCCGCTGCTGCTGCCCGAGGAGTACACACGCGCGTGGGAGAG  
GGACTCTCTCTCTCT  
>locus0150  
CCTCTATATCGACAGCGGCTTTCTCTCGTCCCGCGCTCAGTAGAGAGCGGAGTGGCGCGACCCGCAACTCAA  
CTTTGATATGTTTCTTAAATAACCAAGCGACCGATACCCGAGCAGCAGCAGCGAGCGAGTGCTGCTAATCCGACG  
AGGCATATTGAAGCCTC  
>locus0151  
GACGAGTAGAGGAAAAAGAGAGAGAGAGAGAGGCGATAGTTGGAGCAGCGCTGAGGCTTGAAGTGGTGTATATGGGGT  
TCTAAGCATTCTGATTCTGCTGACCGCTGTCGCCGCTCTCTCTCTCTCTCTTTTCGAGATGCTGCGCGCCCT  
CTCGCACAGCCCATCT  
>locus0152  
ACACACACAGTACAGATATCTTCTCGTGCATGAAATGCAATGTTTAGCCGTGCAGTGGGAGGTGCGAGTGCA  
GACCCGTCGCTACTGCTCATCAATCACACGCGAGTGTCCCGCAGCAAGCGCTGTTCCCTCTCTCTCTCTTTCGGA  
CGACCCCTGTCCTC  
>locus0153

CTATAAGTGCAGAAAAAATAAAGTCAGCGAGTATTTCCGTGCATGCTTGACACGCTGTAGCATTAAACCATGTACCTTT  
AGACCTCAACTGTATAGCGTCGAGAAAGACGTAAGTAGGCATTGCTGAGGATTGGCGAGAAACCGCCGGTATTGC  
TCCCCCATAGACTGT  
>locus0154  
GAGCGAGGTAGTAACCGCGGGGGCAAGTTGACCTACTCCATTACACTAACGAATGCTACAGATTGTCAGAATCAGGG  
AAAGGGGTGCTCCACCCACCCACCCGCCACCTCGGCTACCAACGTGCATTTGAGGAAAAGGTAAAAAGAACAGAAA  
AAAACCTCGAGATTGAG  
>locus0155  
TATGTGTGTGTGTGTGTGTACCGATGTGTACGATAAAGCGAAACACGGTAGCGTGGCGCCGATTTAATTGGAGCTT  
CTGACCGCTTCTGGCATTAAAGTATGATGTCCGCTTGAAGTCAATTTAAATGGAATCGAGTGGGAGATCCTTCGCCGG  
CACGCTGTACACTGCGC  
>locus0156  
AGTTTGAAGTCCGCCGCGAGATAAAGTGGTCTGCTCTGGAATCTTCTATTAGCAATATAGTGTAAATTGTTTCTT  
GCAATATGCATGGAATAGTGAATATTTAAACGCTCCTACTCTCTCTCTCTCTCTCTCTCTCTCTCTCTCTCTCTCT  
CTTAGGAGCGTCTTTT  
>locus0157  
TCTCTCTCTCTCTCGCGCGCGCGCACCCACCATATATGATACGTACGAGGGTCTTATGTTTTATGGCTAATGT  
TTTTATATCTTTGACATATTTCCAGTTTACGGCCGCGAGCGCGCCGTTTGTCTTACGCTGTCTATTGTGTGTGATG  
AACGCCCTTTATGCGC  
>locus0158  
AGCCAGAGCAAGAGTCAAAGTTTTTCTATCGACTCGAGCTCAGAGCCGCATTTCATCGTTTACAGAAATTTGCAAC  
CAACAGGTTTCATCCCGAGAATACTACAACAACGAAACGTCGAGTACTTCTTCAATTCATTTGGGCTGTCTTTT  
CGACTAAAATTAATATAGTT  
>locus0159  
CAGCGCGCGCAGCAGCTACCGCGCTCGCGATCAAATGAATATGATGAAAGAGTGGCGGCTTAGGAGAAGTGCCTGCA  
TACTGATTTGCGGCTGATTTGATGAGCCCTTACCCCTGGCACAAAGCTGTCGAGTACTACTACCCCTCTCTCTCT  
TCTCTCTCTCTTTGTT  
>locus0160  
TCGACGCTGCGCGCGCACACGCGCACACACACACACCAGGGGGGAAATAGAAAGCCGCTAATGAGCGGTGTGTGA  
ATTAGGAGCTCTCGCGGCTAATGAAGCGCTTACTTCTTACACGAGGAGAGGCTTACGAGCCGTGATGCTAAAC  
CGAGCCCTCCGAGACTC  
>locus0161  
AGTGAGAGCGAGAGAGAGAGGGGAGATACGGCGGTCTGCTGTAGTAGTCTGCGGCGCATTTGAATACGCGCAAT  
AAATGCATAATAAATTAGGTCACTTTTTCGTAGTCACTGATTCAGGTCTGCGGCTCTGCTGTCTCTCTCTCTCTCT  
CGACGATATAGGCTCT  
>locus0162  
AAGAAGGGCGGAGAGAGGGCGCTGAATCTCTCGGCCACGCGCGCAGCCAAAGAGAAAATAAGAAAAGAAATGTTAGT  
TCTCGCTTTTAAATTACCATTTTATACGACACATAAACCTGAGAGGAGCCGGGGCGAGAGAGAAAGGAAAGTCTTT  
ATATACCAGCGGCCATC  
>locus0163  
GAGAGAGGAGGCGGGGGGAAATCCGAGCTCGGCAGGGCGCAGTAGCGGCAATAAATCTAGCGGTATATCTGA  
GCTCATGAATGTTTAAAGATACAACCCCGCTCGTTTCTCGAGCGGAGAGAAACCATTTGCGCGCGGCTGCGGC  
GCGGAGAGATCTAGCC  
>locus0164  
GTATGACGCTTGCGCCAGTTTAAACGAGGATCTCCGTATGATTTTATCCAGTGTGTGGTGTACTAACCTGTCCGTGTG  
TTTGTGTTGTGTGCGCAGGAGGTGGCTGTGACGTTGTGACCGGTACTCTTACCGGAGTCCCGGTGCTGCTGTCT  
CTCAATCGATCGGTGAG  
>locus0165  
CGTTTTCTCCAGTGTAGCTGTTGGAATAATGGCTTTTCTTCTGATCGAGCCCGCGCGCAGCAGAGATTTGAAT  
GGAATATGCGATTCCGCAGTGTGTAATTCGTCCGAGCTTTCCCTTCCGCGGCGCTTTTTCGCCCGCGAGCGCCGAC  
TGCTTTATACGACGCAA  
>locus0166  
TCAATCATGTCGGCGCGCGCGCGCGGCCAACCTTTCTCGAGGGCGGTTTCTACGCTCCATTGAGACGAAGTGTGTG  
CTCAACACAAAACACTTTCATTTGGCAGATTAGCTGTTAAACACAGGGAGGAGCGCCGAGAGTGAATAGATGGATG  
GTATATGTCTATTAC  
>locus0167  
ACGCCGAGCGCGCAACTCGATGATCGGCTCGGGCCACATCACGGGTGAGAAGCGGGCACTCGCTAGTGGCAT  
TGCTCCTGCCCGAGCTTGTCTTAGGGCTGAGGCGCGCGCAGGCGCTGCTTCTGACCCGAGTCAAGCAGCAGCAGC  
ACTAGACATCACGAGA  
>locus0168  
GAGAGAGAGAGAGAGAGAAAGTCGGGGGTGTAGAGAAGGACGGCGCTCGGCGTGTCCCCCAATAAGCCCTATTTA  
TGATTTGGCAAAATTTGTTTTCCATCGCAGAAATAAATCCGACTATCTGCCGGGAAATAATCGGCGCGCGGCCACCA  
TTCGCGCCCGCGCGCGG  
>locus0169  
CTGGCTCTCTACAGTAATTTCTGTAACAAGATATAATACGACAAATGGGATATGCTTACTGTCTCTCCAGGAGCGTGA  
GCTCCGTAGCCAGGTCGCTCGCTCCCTGAAACACCCCGTGTATCTGACCGCCACTCTGAAACACACCCAAACAAA  
AAGCCCGCCTAAGTTCAGC  
>locus0170  
CGAGCGAGGAGAGGCGCGCAGAAAGGGGACACGCTCGGGGCGGGCGTGCACCAATTTGTAGCAACAATGTAAAGTC  
ACCGCAGAAATGGAAACGTAATTCGAATGAATGCGCGAGAGCGCTCGCCCTGCAATTTGTCTGCGCAGCCCGCATTA  
TCGCTCGCTTATGATTTT  
>locus0171  
GTATATATCTCATACGCGCGGCTGTTGTTGGCCCGTATAGCAGCGCGCGCGCTCTTCTCTCATTTTAAATATAACG  
GTGATATAAATAGTATGAGCAATAGCGGAGTACGCGAGGCTGTCTCGCTACCCGCGACCTCTCTCTCTCTCTCTCT  
CTCGCTCAGTCTCGCG  
>locus0172  
GCCCGAGGTAAAGGCGAGCGAGAAGGAGAAGGGAACGCGAGAGTCTGAGAGCGCGCGCGCGGTTGAGGGTCC  
GCATTCACAGACAATGTACGTTTTTAAATCCCGTTTTACTCTTATTTGCCCGCGCGCGGAGCTGAAAGTAAAT  
AAGATACTATATCGCGC  
>locus0173  
AACCTGCAGCACTGTATACGTATATACGCGAAGAGTACAGTGGGAGAGCAACCCGCGCAGCTTACTAGAGCGTGA  
AAATTGAAAATTCAAAATGGCCGATATTTCCGCTCGACGAATTAACAAAAGAGACACAGCAGCCCGCCCTTCAATTA  
TGACATGCATCGCTGTG  
>locus0174  
GCCGGTATGCCCGGAATGAAGGCGACGCGAGAGGCTAACCCGGCATTAAAGCCCTGGCCCTAATATCTAATTTATTA  
ATAAAATATGTTTACGAGTGGCGCACAGTACGGCCCTCCGCGCGGAGTTCTCTCTCTCTCTCTCTCTCTCTCTCT  
TCTTTGAGCGCAGTCC  
>locus0175  
ATATATATATATATAGCTTTGGTATATGTGTTTTTACCTTGAAGACTGGACGCGGATAACGGGGAACATGAACTG  
TAGGAGATAGTACCAACATAATGTTGCCGATCGTTTTAATGGCGACGATCAGCAGCTTACTACTAGCTACGCTATTT  
GGTAGGTTTCGAGCCA  
>locus0176  
ATTCAAATCTTAAGAATTTTTCTAATGTTTTTTTTTTCGTGCGAGAGTCTTTGGTTCATGATTGCTGCCAAAGAA  
GAACCTGAGCCCAATGTTCCACACAATTTAGTTCACATGAGATTTCTACCGAAACAAATGCCTGCAAAAATTCAAA  
GGTGAAGAGAAAGACA  
>locus0177  
TCTATAAATAACACTCATCAAATCAAACCTCACCGGCCAAAGGATTACCAACATTTAAACTTGAGTATTACTTTC  
AAGTTTAGATGTTTAGATGTGCTCTGATTTATATGATAGGATGCTCTATATCAGGACCTGAAGGCTGCAACCTCTTCT  
TACCACCTGCCCCAGGA  
>locus0178  
AAGAACGAAGCGAGCGTGGTGGCGGTGGGGAAAGCGAGCGCGGGCGCGCGCGCCGACTGGTGTTTTTGACAGGCC  
GATGAATTAATAATCGAAGTCTAGTGGGGTTCGCCAAATCTCAGTCCAATACGCTCTCGCTCTATACATATAGAT  
ATACAGAGCGCGCAGC

>locus0179  
TGCAGGAGAGGTAAAGTCGGAGCTTTCTCTCGTCTCGCGTCTAATATTATAGGCGCAGCAATCATAAGGGCTTAATATT  
GGGGTGAAGGTAAGTGGCGGACAGCTGACCGCCGGGACGAGCACCACCCCGAGCCCGCCAGCAGGCGCACGCGCGG  
AGCGCGGAAGCCCTCG  
>locus0180  
ATTCATTGCACAGGCACAGATAAATCACCTGTTGCAATGTATTAACCTTTTTTCTACTCGAAATGCAGCAATAGCGTA  
CCTGCTGGCGCATAATCGCTCGGCTGTAACAACAATACATCACACAACACTTAGTTCGTTTGCAACAAAATATAT  
TTAGTGTAAAAAGAAGATTT  
>locus0181  
GTGAGCGGGAGCGAGCGAGCGAGAGAGAAAAGAAAAGGTCGGTGCCTACCCATCGTTGATCCCTTTTGGGTTT  
CCTCGCATGCATTACCATCAATGCCGGTGTCTTGGATCAATCCGCGGCCCTCGGATGTGTGTTTACTCTTTAGCTCGAGGC  
GGAGACGATGGTCTGCG  
>locus0182  
TATTAACGTTCTCGCATTTGTGTACAGTAAGTTGAGTGTCTCTCCGATAAATCTGTGTGTGTTTTTTCTTTTTCAGAAATAA  
AAGCAAGGAAAAGCATGCAGGTAAGATAGTTGAACCCCGATGGAATGGTGGGATGCTGTTTTTTTCTTTATTTCTCGCGG  
GAAATGTGGGTATAAA  
>locus0183  
GCGGAGCGCTCGCATAAATACGTATGCGCGAGCGCAAACAAAAAGCCCAAAGGACTCCGCGCGCGGATACGATCTTGC  
GGCATTGAGATACGAGCATACTAATCTCTGGGTCTTCCCCCCCCCTCTCTTAATCTCTCTCTCTCTCTCTCTGGT  
CTGCTTGACCGCGCGG  
>locus0184  
CGAGAGAGGGGGAGGAGAGTGTCTCGCGGACGCGAGGTAAGAAATCGGGTCTTATCAGCGATCTGAGTCGCGCA  
GTGAGCGCTATTTGTTATTCATAAGTCCGGGGAGGCCGCGCTCGTCTTATTCTCTCTCTCTCTCTCTCTTTGCCCTGGG  
CCCCTTACAGTGTAT  
>locus0185  
GGAGACGCGGGAATATCAGTTCAAAGTGAAGAAGAAGAGGCGCTGCCTCCCCCTCTACCAGGGGTGGGTGTAACCCG  
CGAAAGTAACTTACAGAATGTATGCAAAGGAGGGTTTTGTCTGGTGAAGAAGAGAGGACAGGGCCTTTGCAAAAGG  
GGCCGAGCTTGACCGA  
>locus0186  
GCCTCGTGTGCGCGAGAAAGAGGAAGGAGTCTCTCTCTCTCTCTCTCTCTCTCTCTCTCGCGTGGGCGCACAGGTAACAAA  
CCCCAATTTATGTCAGGCTGAATTAGTAGGCTGCCCCGTAGACTGTTTTCGCTCGAGTCCCTAACGAGCGACGCGCGAAG  
GGGAGAGAGCTCGACT  
>locus0187  
ACGATGGCGACAAAAGCCGAGGACGAATAAGGGAAATAGCAGTGGGAGGGGAGAGAAAGAGATATACACATCCAT  
TACCATCAGCATGCAAAATAGATCGAGGGATTACCGCAAATCCTTCGTAACAATCCGCGGCAAGCAGGTCGGAGCAGC  
TTTTCTCTAATCTCCG  
>locus0188  
TAAGTCGGTGTGATGTTGTGGTGTGTCGAGACACGAGTGCAGTCCCTCGAGCGCATCACGTTGATACACATGGACGAG  
GACGTCGTCGGTCAACAAGCCCGCTCCATCCCTGTAAGTGGTGTACTGCCAGGACTGACTGCCAAATCTCTCATTA  
GCTCTTCACTCATCGT  
>locus0189  
GCGGGTCGATCTCATAGAACTTTTCCGTCGATCACTCTTAATAAATAATGAATATTTGTAATCGCAGCGCATGGACC  
TGGAGAATGCCCCAGATTCACGACTTCCCGCTCGGGCTGACTTTGAGGCTGCACAGAAAGAAAGGATCACTTCTAT  
GACATTGATGTGAGTAA  
>locus0190  
CTTCATCCTCGCGGGCTCGCTAAAGAAAAGTCACTTCTCTTTTCCCTCGGTCGCGGAAAGCCACTCGTTTATCTTGT  
TGACGAGGAAAGAGGAATTAACGAGGAATTAATAGGACCAATCTAATGACAAAAGCCCGCCCTCTCTCTGCCCC  
AATTTGCTAATAATTT  
>locus0191  
CGGGGGCGCGGTTGCACAAAAGCTCCCTCCCTACTCCCGCAGCGTCCGAGGCTCGAAGCAGCCAAAGTCAACCCGG  
TAATGTCGCGATGCCCCCTATGACGACAAATTCAGCGCTCGCAGCTTCGCTCCGAAAGCTCGCGCGCGGTGGTGGG  
CGCTTCGTCGCTCGCTCGC  
>locus0192  
CTCTCTCTCTCTAGCTCGAGGACTCGTCTTTGGATCTCGAGAATGGATGATAGTGGTTCACCCCTGAGTAAAGACTTG  
GACTATACTCAATTTGAACATAAGTTCGACAGCTGGAAATGGGCAAAATGCCAAATCAGTTTTTACTGTGATCACCTATTCAGA  
AAGTATCCAAAGGAGA  
>locus0193  
GGGTGCGGGCTAGAAAGTGTCCCTCGAGGAGGAGGAGGAGCATCGGAAATAAAAGAGCGCGGCGCGGGTCAGTTTG  
AATAATTTTGACACACCTCTCGTCAAAGCGACGACTCGCTCTCCGCGCCATATGAATACATACATTTAAATGTCTCT  
CTCGAGGGGGAAAGGAC  
>locus0194  
CAGCCGAGCTGGGAAAGGAAGGAGCAGCGGATGCAGCGGCAAAAAGCCGAGCGCGCAGGACGCCCCGAAAAATGAATTCG  
TGCGCATCCCGTGCACACATCTAACTTCACTTCCGAGTCTCTCTCTCTCTCTCTCTGAGAGCTGCGAGGTCACACGTGTT  
ATATAGCTTAGATGTGC  
>locus0195  
GACAAAGCATCGCGCGCGAGATTGTTAACAATAAATCACTCTCTAATTTACGACTACTATACCTCGTATAATAATTTCT  
CGCGTGAATTTAAACCGTAAATTTTTTCCACTCTCCGTTTTTTTTTTCCGACCCCTCTCTCAACGTATCTCGGTAC  
ACCCTGCGTCCGGCT  
>locus0196  
GATGATGATGATGAGCAGCAGAGAAGCTGTGGATGGGAAAGGAATGAAACATGTCGGAATGCCAATTTGTCCAGG  
ACCTAAGAAGCGCGTTCACACACTGCGACATGACAGCCCTACGGCCACTTCGGTTCTACACACCAACCACCATG  
ACCACCAGTCTGCCAT  
>locus0197  
GGGACTCCTAAATTTGAAAAATTAATTTACGCCGTGTAAAGCTCGCCCTGTGTGACGCTTCGAGCGGTTGAATAAA  
AACAGCATTAGTCCGTCATAATGATGGTTCAGGGGAGGTTTTGAGCGTAGGTACGAGAGCTCGTGTTCGACCCCGC  
TGTGCGCGCGCGCGG  
>locus0198  
GCTGACGATGTGTGGAGTGTGCTGCGGAGAGCAGAAAAGATGAAGCGAGTAACTAGCGAGGATGGAATACTGGA  
ATCGGCTCCGAGAGGCTTTCAAGTTCAGTGTCTCCTTCTTCTTCTCTCTCTTATTTCTCATCTTAGCCCGCTC  
GCTTCTTGCCTTACC  
>locus0199  
AGGGGAGGTTGTGACTCGAAAGCCAGCAGGTAGCGAGTGTAGCGGCGACCGCTAAACGTGAAATTTGTTAATTTGAAAT  
TTCATTAAGTGAAGTCAGGTGGCGTACAGATTCATTAAGCCTTTTTTATGGATTCCGAACTGCGCGCGCGGGGCGAGAA  
CTGTCAAAGCGGTAACC  
>locus0200  
GAGAGAGAGAGAGAGAGAGAGAGAGAGAGCGCGGTAGGGTGTACACAGAGCAGAGAAAGCGGGAGAGGTTATGACAGC  
GAGTTATTGAGCGGATCTTCCGTAATTAATAAAAAAGTAAAAAAAGGAGAAAGCAGCAGCGCGCCGAAAAAGGGGTGATG  
CAGCGCACAGACAGAGC  
>locus0201  
GAGTCTCTCTCCCTCCGCGCGGCACTCCAGCAATCCGCCCGCCCGGACCTCGCAGCAGTATATAAGACTCCGGT  
CCAATTAACCTTCTACGCGGGTGTCTGTTGAAAAAGGGTGTGATGATTAATAATTAACCCCTGCTCGCTCTCTCT  
CTCTCTCTCTCTCTCT  
>locus0202  
AACCAGTGTGATGGCATTAAACAAGACCATAGTTAAGTGTGTGTTGATCACTTTCAGTTGAAGCCAGTACGCAGT  
TTAGACAGCTTGAACCTGATGGAGTGGCGCTTCCGCGCAGGCTCTCCGCTAATCCAAGTACCACTCAAAAACCCAG  
TCCCTACGAACACTACCAAT  
>locus0203  
TCTCTCTCTCTCTCTCTCTCGCTGGCGCTCGCTTCCGCTGTATGTTTCGCGCCGATATGTGTCTGAAACAAACGTTCC  
ATCAGAGTCCCGATTGTTGCCAATCATAGTTGCCCTCTCTCGCGGCGAGCCCGGATTCAGTTTACAGCTTTTTTACGC  
GCCAGCGCAACTC  
>locus0204  
CTCTCTCTCTCTCTCTCTCTGCGGCTAGCGGGGTATATAAGTGCCAGGAGCAGGCTCTCGGGATCGATCGGC  
CATTGCTATGGAATGAAGCAACTACCAGGCAAACTATCTTCAAACCGCGCAGGAGCTAGCTACTCCACGCAAAAG

GCCGCCGGCTCAGACACA  
>locus0205  
ATTTTAAATACGGAAGGATCACAATAGATCTTCACACTATACAATTAAGCGTGGGCATCTTATTTATTTATGTTAATC  
AGTCTGGTTGTCTTTTTCAGAGGCACATGATGCACAGATTAATGATGAGTGTGCGATGAGCAAGCAATTTGATGAACAG  
CATGAAATATACCATGCGTC  
>locus0206  
AAATTAATAAGAATAGAGGGATACTTTTCCAAGCTGGGCATGATCAAACTCTAAGTATTGTCTAAGCGTGTGTGCTT  
TCTTTTGGTAACTCTCAGATAATGCTGGACAGCAGCAGGAGCTGCTCAACACAAACAGCCCGCGACGCCGGCCGGC  
ACGAAACAGATCCACACAGACCTACTCCCAAGGCTAAGTGTGGAGGCTTTAGCTGCATCAGGCATGCCAAGTGGTT  
TCAGGTTGAATCAACTCAACATTCAAACAGACAGTTTTTTCTTAGAAAAATGAACAGATCGAAT  
>locus0207  
GAGAACAGCCAAAAACAATAAATCAATTTCAACGAAAGCGGGTGGGAGGAAGTACTTAAAAAGGGTATTATGTGTG  
TAGGGCTCGTGTAGCACTGTGGCTTGTCTGTACAGCTTCCCTTACGCCCAAGGCACCGCTGTACATAGCTGCTA  
TCTGCATTGGAGGTGAGTGT  
>locus0208  
AAATTTAGTGCATGCTTAAATAATCATCACTAATGCTGAACAAATTTTTTTTAGATGATGACCAATGGTGTGCACA  
TTGCAAAAGATTAGAACCAATTTGGGCTCATGTAGCTCAATATCTCCATTCATCTCTATCAGAGTTGGCCGAATAGATT  
GCACATGATTTACAAGTGA  
>locus0209  
GTCGGGTGTACAGCGACTGGAATATCATTTTGTAGTGAATAGCTAATGTAATGATGCAGTTTTATCTCTTATTTATC  
ATGGAAACGAGATAAATCGCGATAGTCCGCTTTATTTGACAGCGGGAGTAAGAGTAATTTCTCGCCGGCAGTCCGCG  
CCTCCGACACATATACAGC  
>locus0210  
GCCTACGAGAGCGTCCGGAGAACGTCACGTCGCAACTGCAGATAAACTTATTCATGTTGGACCAGCTGTGCATGATGGA  
AAGTACCGGCACTGGTACATGTGCTTCTGTGAGGAAGATATGTGCAATCGTGTCTCCCTCCCTGCTGCCAATCCTC  
TGCTTCCCTGTATCCTGGCG  
>locus0211  
CAGAACTGCCAATTTTGTACAGTGGCGACAACGAGGATAAGCTGCTGCTGTGACGGCTGTGATCGCGGCTATCATA  
TTATTTGTTCCGTCAAAAATGGAAAAATCCCGATGTTGGTTAGTATATTAACCCAGATTTGTTATTTCTTTCT  
TCATCGATGCGGTTATACAC  
>locus0212  
GGCGTGTAGGCCACCGCCAGGGCTCACACTTCTGCTCAGCTCGCTATGGCGTTGTACATGCTTGGCCAGCATCGCTTGG  
GACAAAGCATCATGAAGCTGTGAGTCTAAAGAAATCCAGCTAGAAAGTCCGCTCGCTCAAGTACGAAATCGCAGCGT  
CTCACTCAAACTGTCTACTC  
>locus0213  
CGATTAATCAGAAATGAATGTAGCGTGGTTTGTAGCACTGTGGACTGGATGTGTTTTTGTCCGCGAGATGTACATGCAGGA  
GCTCACCAAGCAGCGGAGATGCTCTACACCGTCGAGCTGGTATGTCTACACTAACTTGAATTTAACCCCTGATGTC  
CTCTCTACACACCTGATC  
>locus0214  
GGGCAATCTGCTCCTGCGACAGTTGATCTCGCCCTGTACATGAACTCGACGGCGGCTTGGCTCCGGCCACTTGTGAT  
GTCTTCATGATGACGATCGGGTGTGGCAGGGGTTGTCGAAGAAGAGCGCTTGAAGTAGGGGCTGACGGCCGAGAGGA  
CCATCTTGTGGGCTTGACC  
>locus0215  
CGGATAGATAGGATGCACCGAAAGCCGCGCTCTCCACCGTATCGATGATGGTGCATAAACCGCGGTATTGTGCAAT  
CAACCGCTATTTGGTGTCAATTTGTGCCAGAGTTAGGAGGCGAGCTTCGCTCTCTCCCGCTCTGAACACCGCGTGAATCT  
GCCCGATTGTCTCTGCTC  
>locus0216  
AGCGGAGAAACAGAGAGAAGGAGCGAGTGAATGCTTAACAGCCGACTTGAAGGGCGTCTGCCATTTTGTAGTCAATA  
CTTGAAGCTTTGCTCATTAAGAATATTTTACGTCGAGCGCGGGCTATATAGCTGCTTGCCCGAGCTAGAGAGCGA  
GCCCTGGAATCGGGGCGGC  
>locus0217  
AGCCGTAGAGCCCGCCGAGAAAGGACGCGCCGAGCTAAAGTTCGGTATGCTCGAGTAACTGTTGCCGCGCTCGCCG  
CGCTCACCGCTGTCTGGTGGCTTCTGCTTCTCAGGAGTTGCTGTTGCTTGTATCCGTTGGTCCGTTAGAGGGC  
GAAACAGTGGCTCTCCTCCCGATGACATCATCGCCGCTGTTGGTGGCGCCCGGAAAGGCTCCGCTTCCCTCTCC  
CGCAGGGCTTCTTCTGGCACCCCTCTCCGCGCGGTTGCTGCTGCTCGCCGCTC  
>locus0218  
AACGTTCTAACCGCTCATATAATTTCAACATTCGCGTTACGCAAGCGGTGCTCACATTTGAAACCTAAGATATTTA  
GACAAAGATAAACAGCGGTATAAAAACTTCTCAACACTGAAAAATACAAATCTATCGTTTAAATGACTACCAGTGTCT  
CAATTAACCGTTCTCGTCC  
>locus0219  
GCTAAGTGGGGCAGCTGGCAAGCACTAGTCAAGCTTTGGGTGGGCTTCGGTCTATGTCGGGCCCTTTGTATAATTTT  
AGTATTTTTTCTGATAAAAAATCAACTGAAGGCACATTTCTATCGGACAGTCCGCCAGTGTGTGCTGTGAGTGAATA  
GGCCGGGGCCGCTTCGAC  
>locus0220  
AGCAGCAGCATAACTACCCCGGAGCCGGCGCGCAAGTGTGGAACTCTCGGGCCGGTCCCTGCATTTTGTATTATA  
TCGGCCGCTTAGCATATTTTGTAAATTTACTGTTTGTAGAACCTCAACAGTACGAAATTTCAAAGCGACTGCACCCGCG  
TGCACAAAAAGAACGAGT  
>locus0221  
TGACCAGCGCAGCCAGTACGATGCCAGGTACAGTTATCGTGTTCGGGTCCTCGCTCGTCGACGCTGGATCGAGTAC  
GCGATGAAGCAGAGGATCCGCGGATCCACAGCAGCAGGGCGAAGCCTCCGAACAGGTTCTTGACAGAACTTTACCCACTC  
GGCGCTCGCTCGCCGGCGC  
>locus0222  
GTGTATAGTAAAAGTAGAAAAAGATAGTGTGAGTGTGAGTGTGAGTGTGAGTGTGAGTGTGAGTGTGAGTGTGAGTGTGAGT  
GCAGAAATGTTGACGCTGCCAGGGGACGGGAATGTCACAGAGGATGAAGGCCAAGAGGGCGAGATCTCGGGGATGT  
TGGAGGTGAGGTGTAGGCG  
>locus0223  
TGCGCTATCCCGATGAACCTTAGGACCTCGACGCTTATATATCCCGGTTGGAGTTGTGATCTGTTACCTTTCCG  
TTAATAGCTTGTGAGTGAAGGGTTTCGTGGTTGACGCTTATAATCACTCTCCGCTTCTCTGATAGCTAGCGAGAT  
GGCTGGCACCTAACGTCACA  
>locus0224  
GAGCGAGATGAAGCAGTGTGAGCGGAGAGGCTCGGACGCTATGGGAAGGGTAGTTGCTTGTGGAGCAGCGGAA  
GAAAAATAGCGGAAGTCACTGACCTCAAGGGCTATATATCACGCGCTTGAATGGCGGAGTCTGCTGGTATACACGT  
ACACGTGTGCGTATGCGTGT  
>locus0225  
AGCAGCAGAAAGCCCGCGCGACAGCGTGTCTGCTGACGTCCTCCCGGCTACGCGCAGTGGCGGTGATTAATGT  
TGCCGAACAAATTTGCTAGAAAAACATGTCGTGATGTTGTAACACCCCTACGGCTTCCCGCGCTCCCTTTCTCCCTCT  
GCACCTTTATCTCTCTTCC  
>locus0226  
AGCATCTCGCGAGCAGCGGTTCAACGCTGTTGCCGATCGCATCGCCGATCTTCTATTTCATTGTGAGAAAAAC  
CAATTTCTGTTACTAAATACCGCGCTCGCCGACAAAAAGCTCCGCGCTGCGCCGCTAATATACAAGTTTGTCT  
CACTGCTCTACCCGACGGA  
>locus0227  
TCTAGAGCACCTTCTCCGCGCGGAAAGTCGATTTGATCGGCAGATTCGAGGCTCGTTCCGCCAGATGCAGTGTGCA  
CATAAATGGCCGGATGTGCACTTCCCGCAGGAGGACCAATATTTCGATACCGCTCCGCTCTGCTAGCTGCGCCAC  
TATCTCGCTGCGCATCTGC  
>locus0228  
CTCACCACTCTGATCGAGTTTTCACGCGTATACATAATGATGCGGAGGAGCGCCGACGTTCCGCTATTGATTTCA  
GCGCTTTGCTTTTAAATAAAATGCAAACTATCTGCTCGCTCGCGGATAGGAGGGAGGGAGATCGGGAGGTAAGA  
CGGATACGCTTAGGGGCGCCACGACAAACCCGGAATATGATTAATTCACGCAACCCCATCTCTCTGTGTGTGAGT  
GAGTGTGCTCGCGTGTGACGACGTTGACGCGGTGCGGGAGGACACTTTTT  
>locus0229  
CGAAAAACAACGCTATACTGGTGTGTTTCCACAAAAATATTGCTTAGTAGCAAAATGGACACTCAAAGTCAACTAACCAT  
GTCTGTACAAAGTGTCTCTGGCATCTTAACGGCCACCTATACTGACTCGGAGGTTGAAGACGGGGTGGATGACGACC

```
TTCAGGAGAATTCAAACACT
>locus0230
CCGTTCGCTTGGCGGCGAGTFCAGACAGATCGAGACGGCTGGCTGCGTGGTGTCTTAAAAATACGATGAAAT
GGCGTGGCAACCGCAAGAGGAGGACTTCGGCAGATCCTGACGCTGCTCGGGAATCGCAAAGCCCAACACCGGACTC
AACGCGCCGTCCAAACAGTA
>locus0231
CGAAGTGTATATAAGCCAGTGTCTTCTCGCGGTGGATGTATAGAAAAGCGTACGCGCTGCCGTAATATGCATAAA
CGGATTTGCCCAAACTGTAAAGGTTAAGTTTAGCTCTCGCGACGGCTAGGCCCGGTACGTATATAGCCGCACAC
CTGCCCTGCGCAAGTCTTCGG
>locus0232
TATACACACCTACGTACGTATCTATCTACATATTTTCTCTGTCTGTTCGCAAGTATGCGGCAAGTGTTCACAAACGC
ATCGCGCTCAGAAAGCACAGCTGACGCACAGCGACGAGCGGAAGTACGTTTTCGACAGATGTGTGGCAAGGCTTCAAGC
GGCAGGACCACTTGTGAGTT
>locus0233
TTAAAGGTGTAGAAAGATTAATAATCTATCAATAGAAGGACTTTTACATGGGGTCATACTTTTTTAGAGTACTTACTGT
CACAGGGATGTACTCTATTTTCGACCACTTGTGAAATTAACGATATGCAGTTGCATTAGGTAATGGAACCGTTGAATA
CATTGCAATATCGATTGAAG
>locus0234
TGAGTGCACAAAATTTTGAAGATGTGCAAAAAAGAAATGGTGCAGAACGTATGTGACCCATACTATTCGGTACTCAT
ACTCACTGTTTACTTACTGAGCAACCCGCTAGTCGCTGCCCATACTGTATCTCCGTAGGCTGCGTGAATACTGGG
AGTACGCGCGCTATACGGC
>locus0235
GCGGAAGAATAAGAGAGGAAGTGCAGCTCGCGAAGCAGGAGGGGAAGAAATGCGATCAAAGCCATCTGTTGCATT
GTCCCGCAATTAGGAGGCGCAGCTGAGTCCAGCGTACTTACTTGCACAGTACGCTCAACCGCTGGAGAGCTTGGC
CGAGAGCTTTTTTCGCTGCTT
>locus0236
TTGCCGATGAAGGTGCAGACATCTTACGGCCCTTGGCGGGATGTGCGACAGCGGCTTTCAGTGTGTTGGGATCCA
CTCGACGAAGTACGAGCTGTTCTTGTTCGGACGCTGAGCATCTGCTCGTACCTCTTCAATGACATGCGACCGCGGA
AGACGGCGCGCAGCGTCCAG
>locus0237
TACAAGTGAAGGATTTGAAGAAGCCAGAATTTACGAGTACTGCCGTTTTCAGATTTACATTTGAGGCTGCAT
GTTAATGTACTTTCATCAGTGTCTTGGTGAATTTGATACCCGCTGCTTGGAGCCCAATTCATATGATTTGTCCCTT
TCATACACGCTGCTGATACA
>locus0238
AAAAATTTGTACATTAACCTGGGGCACACATCCTCTCGGTCGAATATCGTTACTTTTTTAATTAATGACAGTA
TGGTACAATGATCTCAACCGCAATGTCTCATCACCATATTTTTTTGCATATGTTTCCACTGCTTTGTTCCGATATT
ATCATTCTCTTTTTTTGTT
>locus0239
CGCTAATAAATATTTAACCTTTAAATTTGCAACAGTCTTAACTGTAGCCATTTGCATAAGGCTTCTATTTTACATTTAC
ACATCGCATAAATGAAATTTAAATTTCAATTTGCGCGCTCCCCCTTCTTCTCTCTTACTCCGTCTGCTCCGACGCA
GCGCGAGCGAGCCAGTCCCGCAGCGCCGCAAACTGCAATAAACTGTAAACGGGGCCACTTTCCTTCCAGAAATAAGCC
ACCTTCGTTTTGCGAGTCCGCGTACACTATACACAGAGACACTTCCGACAT
>locus0240
CCGTGGCAGTCCGAGGAGGAAACAGAAATCCGAAAAGACAATGCCCGGCCATCAGTGCAGGAGGCCATTTCTGCCTC
ATTGTGGACTCCATTTGCCACTCTTAGATTGCCGTTGAAATATCTCGCGAGCGCAATGAAATAATCGTAAACGAGGGGA
ACCACCGCAAAATAAAGT
>locus0241
ACGTATAGCCTCGGCATAGAAATCGCTATCGCGGCCATTCATCAATCCGTGGAATCAATACGCTGGAATTAATGAAAGCG
CCGCGCAACAGCGAGTACGCGCCGGAATGTTAATCGCATCGTCCCGAGCCTCCGCTCTCCATGCTCGGTATATA
CACATTCGCGGGCGCGCGC
>locus0242
GAATCCTCCGAAGCGAGCGCAAGAGGTCGCGCCACAATACCATTACTCGATCGGTATCGCGACCTATATAAT
TATACCTATAACGCCAAGCACAGGTAATGGCTCAATCCCGCACGTGTACGGATGATAACAGTCCGAGAGAGAAAGTT
ATTGCGAGAGTTGCGCGC
>locus0243
AGCTCTCCCGGGGAGCGCGCACAGTCTCCGGCATCACACCTTACTGGCTCCGAGCATCGCGCCGTGTCGTATC
GCTGCAATAATAACCGCTAAGCGATACCCGAGTCCCGCAGCTCCACATTAGGGGTGCAGTCGGCATAAATCATCTCTTG
GGCCCGATTTCTCTCTCTT
>locus0244
GCACACGTACACACTCTGGCAACCCGACTCGCGGGAGCGAGAACAATAAGCAGTCCCGCCGTGTTGGGGCCATCA
AAATTTCAAAAACGTACCGCGCCCTTTCGCGCTCGGGGATAAAAGCCAGCATATCGGTATCTTTTCAGTACGTACCGA
TACGATCGTCTGTTTGGAA
>locus0245
GCGCGGGGGTGGTAGGATGGGATGCGCGCGTGCAGCGCGCGTGGGGGTAGGGGAAAACGCGGGGATTCATTT
ATTTAACCGAGGTAGTTTAGCGAGTATTAAGGGTTGAGTTTATGACACCCCTCGGCTGCCGGATGTCCTATTAATAC
GATATGAGCTTCGCTCGTTC
>locus0246
TGTCAGTGACAAAACCGCCCTGCAGCACAGTACGCGTCTCGGGCTGGATATAATTTGTGAGAAATCACCCAAATAG
CCTCCAGTTATGCGGCCCAACAGATTTAACCAATAGTTTAGCTATGCGAGAGCCCAATACATTTTCGCTTTCGCGCAA
GCGAGCAGAGGCGATCCCTG
>locus0247
GGCCCGTACACTCTCCCGCACAAAAGTGGATGGGACGTACTGGCGAATCGAGAGAGAAGGTTTACGCCCTAATGGGAT
TTGATCTCGTTAACGCGGATCGTTCTTGTGCCCTGCTAAAGCGGAGCATTTCTGACAGCTCTTCTTCTTTTTTCC
TCCCTTATTCGCGCGCAT
>locus0248
TGTGGCATGTTCCACAGTTCAGGAAGCTCCTGGTCTCTCCCGCAGCCCGCAGTACCCCGCTGGGCCATAGCC
CCCTGAGCGGGCGCTGCCGGCCACCTGCGATCATTAACACACAACACATAGTTACCAACTGCACTTACAAACAGCC
TTCTTCCCTTCTAACTTTA
>locus0249
ACGAGAGCAAGGCTTAAAGCCTTGGCGCTTGTGAGTCCGTGAAGACGGAAATTTGGTTGAAATTAATAATGGTCAATG
AGGTGGCCACTCTTTGAAATCAAAGCCTGCTGCGCGGTTTAGGAGCGCTGGCGCATACCCACTTGGCTGCTCTCG
CCGCCGTGATAAGAACGCTG
>locus0250
TACCAGGAAGCCCGTAATCCTCGGGCTTCTCTCCGCTACTCGTGCAGCGCGCGGCGTACACCACGCGATGGTACAT
TTTTAATTACTTACACCCACGAGCTGCATCGCGCGGATGACTATAAATCAAGCGGAGCCACCGCCACCGCCCA
GCCAAAGTAATACAGCTTGAATTTAGATAATGTTGCCCAAGCACGGCCCTCTTCTTGTCTCGCGCGCGCTCTA
TCTCTATAGCTATAGATGCCACGCGTATATAGA
>locus0251
ATACGAGCGTGTAAATAAAGAGATCCAAGACGATAAACACCTCTCAGCGCAGCTCAGAGCGCTGTAATCAGTAA
TCAATTTATAGTTTCTATTGTCTTGGGATGAGCGGAAAATCTTTCCGATTTTATGACGTGGAAGACGATATAAT
AAGGAGAAAAGAACCGCG
>locus0252
CTCTCTCCTGTACACATACACCAGTACAGTATAGCGGACGCGCTCGTTCGCGGAGGTAACAAGCCGTGAAATTAC
CTTTAAATATAGATTATGATTAATGTGATGCTACGCTCGGCTCCGTAATGTTCTCGTCCGTAACCCCTATATGTG
CCATACACAGTACACACAC
>locus0253
AGAAAAGATAGCCCGCTCGCGCTCAGTGGGTATCGTCTTCCAAATCGCGCCGAGGAGATCAAGGATCGGGTTATTA
GGATCGAAATGAATGAAATCCCTTAAACAGGACCCCGCGCCAAAACACGGCTACTCGTCAACCTCTGTAATATT
TTTTATTTACAAATCAAAAT
>locus0254
GCGACTCAAGAGGGAGCGCAACAAGGAAGAAAAGACAAGTCCGCGGGGGGAAGCTATATAGAGAGCGTAACGGATGAC
CGCTGATCTCATTTGTTTTCATTTCTTTCGGAATGCCGCTGGCTGTAAGACGCGGAAATGAAGTCCGCGCGGGTGTG
ATCTAGAGACGGGATTCAT
```



>locus0255  
TATTAAGGATGTCAGCGCGTCTAACTTGGCGACTATAGCACCAGTTATCTTCCACCGTAAACATTACAGAGATAATCATGT  
TACTAAGACTCTGCGTTTTTAATATCAGCGAGAGAGACTCGGCCAGGTATGTCGGGGGACAAAATGTTTTCAATAA  
ACTGTTACATTACCTGAATT  
>locus0256  
AACATCGGCCTCTACAAGGAGATCTTCAACGGCAAGCGCAAGAACCCCAACGGCTGCGACATCAAGGCCACCTTCTTCGT  
CTCGCAAGTACACCAACTACTCGGCCGTCAGGAGATGCACAGGAAGGCCACAGATCGCGGTTCACTCCATCTCGT  
GAGTATGAATTTCCGCTTC  
>locus0257  
TTCGGATTTCCGGCCCAAGCGCTCCACGCTCTGCGCTCTGGCTCGCTGCCAAGAGACGCGAAATTTTTCTA  
AGTCCAAAATGGCGTCTGCGACTAAGTCCCCACGTAAGCGCGGACCGCGCGCGGCTATGTTCTTTCAGCAGCA  
GCGCTGATGCTGGCGTGTG  
>locus0258  
ATACTAAAATATAAAACAAGCCGATTTTTCCGTTCCAGGGCAGTGAAGGCATTTCAACAGGTGCTATGGTGGAAAC  
AGGATTTCCACGAGCTGCGAGTTACCTACGGTTCGGTTGATGCTGAAGTCCACGGTGAATTCGACGCGGCTCTCA  
AGCACCTGACACTCGCCCTA  
>locus0259  
TACTCCAGTGTACAGCGCATCTGTCAGCCATAATCTTAACTCACTCGTTAATGCCGCCACATCGCTGTCCAGCATC  
ATGCTCCAGGTCTGTCTGTATCATATCTCCGGGGCGGACCTCACTCGGTGCTCACATGCTCTCCACCTTCGGCG  
GCTACTTTGGCGCGTGTG  
>locus0260  
ATTATAGGGGAGCACCTCGGTACATCGCACTCCCTAAAGCCTCGAGTCGAGTCTCCAACTCTCTGACCTCCCGCT  
CAATTTGTCGCAATTTCTTAAAGACCTTAATTTGGTTCGGAAAATATACTTATTTTCGAGTACCCCTCAACGAGAGACCAG  
CTCAGGACTTCATTTCTAG  
>locus0261  
TTAAATTAATTCGCTATTAATAAAGTTATAAACAGCATATATTCGCTGAGTTCACGTGTTGGTTCGCTATCAGTTTGT  
TTATTTGTTGTTTCGGTTCCTTCACTACACTTCACTTGCCTACTTCCGAAATGAAATGAAACCGTAGCCATAACGA  
TCGGTCCGCTAGGTTATGTTGTTCCCCACGAGTCCGCCCATGTTACAGCAGTTTTCGCGACAGTGTGTAAATTTTC  
TTTATTCTTACTTCTTCTATTTTATTA  
>locus0262  
CAAGCCATAACTCACCGCTGTGACCCATATCCAACTAATTTTTCAGATAATTAATTTTAGTCGGGCTTTGTTACG  
CGGAGTTAATTTTCGATTTGGCCACGTTTCACTTCCCTCTTCCCTTCCAGCTCTCTATCTATCCCGTCGACGTTTTG  
CCGCGCGCGCTCGTTGACG  
>locus0263  
AAAGTAGGATAAAAAGAGAGCGTAGCTCGAAGCTCGTCAAGAAACAGAGAGAGAGAGAGCGGACGGGATAGCGT  
GTCTTTTGTATTATAAAGATTCGCCACGAAGCCCGAGTCTAGATCGCGACCGCCCGTGAATAATAGTCAGATATA  
CACCTCTCACCCCTCCCG  
>locus0264  
CAAGAGCTGCTTCTCTCCCTCTTTCCACCCGGCGGAGGAGCAGCAGGAGAGTTGTTATCTAATTTTACTCTCAACG  
CTTCTCGATTTATTCGCCAATTTCTCGGCGCATTACAATATGCTGCCTAACGTTCTTCTCTCCCTTCTCTGGCTGC  
TCCGCGCTCTATTTGCTCT  
>locus0265  
TTAGGGCTCCCGCTCTTAAGTAATCTTCCCTCCGAATGACTTTACGCGGCATCATCGTCTTTCTCTGTATAAATTA  
GTCCACGCGCCACATAATGGCGTGTGATGCGCTACTGTCTCGCGCGCTTCCGCGGCTCACCTTTTTTCGCTTTTT  
CTCAGGTAGTATCTTCTCT  
>locus0266  
AGGAATAGACCGCGCTCCTCGTAAACGGCCGAGAGTTGTTGGTGGCGTGGACAATGCGAAACAGGTTCCATTGAGACAAT  
TGGCAATTTTCGACCGCAATATCCGTCGGAAGCGTGTAGCGCCACGATTTTTTCGCCCTTCTTCCGCGCAATTCGC  
ATCGTCTAATCGCCTCGTTT  
>locus0267  
GATCAAGAGATCAAGTATAGAATGAATAGGATCGAAGGAGACGAGATTTTCATGAAAAGTTCGCCAGGACATTTATC  
TTGTCCGGAAGACAGTGAATCCCAAGCTATGCTTTACATTTGATCATGATATACTATATAGAGACATGACTTTTCAATT  
TAGTCAAGAGATATTACA  
>locus0268  
ATCTTTGCTACGTGGCGCTTCAATCACCCGAAACTAAAAGATTCGATGCTTCCAGGGACGATAATCGCTCCCTATC  
CACTGAGCAACGCTGGATCCCTCCTTCAACTATTAGACGCGATGCGCTCACCCAGAAAGCAGAAATGATGTCATCTTTA  
GAAAGTTCGGGGCATTCTT  
>locus0269  
GCAGCACGACCTGAAACAGCGCTGAGTGAGGAAGTTCGAAGAAGAGCTGCAGCAGCCACAGCGCGCTGAGACCTTCA  
CGAGACCCAGTTGCTCGACATGCCCCGAAAGCTATACTTTGTGCGGCCCCCACTAACCGCCAGAGGCTCAACCCCA  
CCCTGCAAGCTTTCGCTCTC  
>locus0270  
TGTAATATATGATCCCGTGGACGACTCGCGAGTTAGCTGCAGAGTCTCGGGTTCGCAAAATGTGGTCTGTGAC  
CGTGGTAACGCCCTTCTTCTCGTTGGTTTTCTCCACAGTACGTTCTGGAGTTCCTTTGAAACCGGTAAGTTGC  
AGCTCAGCTCTCTCGTAAAT  
>locus0271  
AAACAACCCCTTTCGCCGGTGTCCCGCATCTTCGACAGATACAAATGAATCCAGCCGATGTAATCTTTAAA  
GGATATTCGGCTGTGTTTCGCTTCGGTTAAGCTATATAAATATACGCGGGATGTTTCGCAATCAGCGCCGAGCTCCCT  
TTCTGCTGACTGCTCGCGT  
>locus0272  
TTTCCGAGCGAGCTTCCCTCTCGAATTTCCACGAAACAAGGAGGAATCGCGAGAGAGCTCCATTGATTCGCGTATCA  
TCGTAATTTACAGCGCGGTTTACCTACCGAAATAACTCGAGGACCTGTGCTGCCACACGGCCAAACCTCCCTCTTTT  
CCTTCGGCTTTAAACAAGCCAGCAAAATGGTTTTACTTTTTCGAGAGCGGACGAGAAGCTACTCGATCCACCCCTGCTTT  
TTCTTACCCCTTCCCGGACGCTTTGACAA  
>locus0273  
CGGACAAGAAAAGCAGACAACAGGTTGGTGTGTCGATATTTCCGACTGCCTTACATGAAAATCATCTGGTGTACAGCAGG  
CTGATTTATAATAAATATTGGTTTCTTGTAAATGTTAACATTCCTAGGTTTGTATGATGATACAGATTACCTAATCGTCA  
TCGATTTAGAGCAACTATAT  
>locus0274  
CGTAAATATATCAGACACAAGCTCCAGGGCATTGTTAGAGACTCCTACCTGATATGAGCACCAACACAAATCCACATGAT  
CCCCACAGGCTTCTCATGATGCTATGTTGACGTCACGTCGCGCTCATTCTCCGCTGCCGCTGTTCTCCGAAAGCTTC  
AGCGTAGCGGAGGCTACTCC  
>locus0275  
TGATTTGATAAATGGCATTTAGGCTGGGACTGATGGTGGCGTACAGATGTTGAGGTTAACGGATATTGGCGCATCACATGG  
CATACTTGGCGCTCCATTCACGTGCCAATTCGTTGTTATTTCTCTCTGTGCGTTTTGATATCTCTAGCTATCTCTGGCAG  
AGCGGATCATCTGGGTTCCG  
>locus0276  
TCGAGTAACAGCTTTGTTGTTGGCTCATTTCAGCAGGGTTGTTGGCGTACAGACATGGGAAGTGAAGTACTGCTGCC  
TGAGGTGGAACAATCATCAGAGCAACTTGTGGTGTGTTTCACTGCTGCTGAGTGGAGTGGAGTGGTGGAGTGGAGTGGAG  
CTGGCTGCACGAGGGCC  
>locus0277  
GCAACAATGGCCGGCGCTGTTTTTCAATATTTAGCCATCATGACTTCTCGACGGGTGCGGCCCGTGAATAATCTCCGG  
TCGAATTTGAAACTAGATAATCAATTAGACGACAGCTGCTGCCGAGTTTTACGCCGCTGCTGCGGAGGCGAGTGCAGAG  
GTTTCGAGGTTCTGCTGCT  
>locus0278  
CTCGTCAACTGAGTATTTGGTTCGCGCAGCATCGACAAGTTTTCAAGCGGGCCAGCGGCTCAGTTCCGCGGCTTC  
GAGGTTAGGCTGACATGACATGGCGCACCTGCGCTCGCTGCCCTTCCCTCCGAGTTGCTCGGTGAGGAGACCGCT  
GGACCCGGCGGACGCTATCT  
>locus0279  
AAAGAGGAGCCAGTCAAAGTCCGGGCGAGCTCTTTCTCCCTGCAGCCGCTCTCTGGCGGGCCGAGCATTAAATAT  
GATATATGCTTATTTGAATTTGTAAGTAAAATGGCCGGGTAGTAGTCTGCTCGGTAGGACTCGCTGTTTCTTCTTCT  
CGCTCGACCGCTCGTTCTGC  
>locus0280

AAATATACCCCTAACCAATTAATTTGCTGATCTTTTTATAATTTTCATATATTTTGTCCAGGAAGGTTCTCCACTCCCAA  
TTTTGCCACTGAGCAAGAGGAGAGCTGGAAAAGAAACTCATCCGTAGAACTCTGTTAATATTTTGGCGTTGTTGAGATC  
TCCATAACACACAAAAGAA  
>locus0281  
TGAAATGAATAACGCAGAAAGGTATACAGGCAAGACAAAAATAACAACATCATGTATTAAGAAAGGTAATTCACATACAA  
CTGTTTATTGAGACATGTAGAATACATCTGGTCATACAAAAATCTTTGACACTTTAAATCAAGCTCCTAGCTCGAAAAG  
GAACCATATTTCAACGCTGT  
>locus0282  
TGCCGTCTCTGGGGAGGCGGTGGACTGCCCGCGCCCTCGACGCTGCTCCCGCTGTGGCTGTCCAGCTGGGTACTGTGACC  
ACTGTCACTGCTCGTACCGAACCTACGCAAAACAGCGCCCAACACAATTTCTATCACTACTTATCTCTGTGCTGTCT  
GATGCGGTTGCTCTCGCTCT  
>locus0283  
CAATCCTGAATGAATCCTAAAACCTGCTCAATCTCTGACATTTTGTGTCTTGTTCGCCAGTGTGAACTGCAGAAA  
GCTAACCTAGAGGCCAAAATACCCAAAACCTGGCAGCGGCACAACCTCCGGGGGGACCGGGGCCAGTGTACTTCCCC  
CTCTACCACCACTACCCTGCTCTCCCTTGGCCAGCGCAATCCCACTGGCACAGCTGTTAAGCAAGCGGGGCCCTCA  
ACGCCCTCTCGAGTCTCACCGCTCTCGGC  
>locus0284  
ATTGGCTAAAGCGGAGCGAGCGCTGCGGTGTGCGGGGCATTAATAACACGTGTTCCGCTTGTGAGCTCATAATCTCGTA  
TAATCTTTTGAAGTTGTTAATACTCGCGGCTTACGGGTGTTAATTTAATATCCATACAGGTGGCCACACATGAATAT  
CCGAATCCCACTGGCGCTTC  
>locus0285  
GTATCGGTGAAACACGCGTGGTGAATCTATCTCTCTTTCCGGGGCTGCTCCGTCGGCTTCCCGGCGACTTTATGCC  
TCATAAAAATGATATAAAATTTGTAAGACGCGAGCGCGCGCCGCTATAACGACCGAAGGCTTGTACGATGGAGTGG  
GAGATGAGGGCTGCAGCAG  
>locus0286  
TATAGCGGAGAGAACAATGAGAAATCAGAGTTATACAGCACAAAACCGGCTATAACAGAGTCGATTTTTCTATGTCCG  
CATACTCTAGTTCCACGCAATGTTGTACTCTGTACCCCTTTAATACTATTTGTACTTACGAAATCGCAATACACAGTCCG  
TCCGGAATCTCGTCGAGAT  
>locus0287  
TTTTCCGGCGCTCGCAGGGGTTGGCTTTTTCCAGAGCGGGAAGCTGCCGCGCGAGGATTAGTGTCTGTATCATGGCGGC  
TATAATACATTTTTTTCTGATCGAGGGGATCTTTATGGGGGTGGCCCGGCTCTCTCTCCCGCGCGCGCTGTGT  
GTATACACGCACTACACAC  
>locus0288  
CGTGGGGCGAGCAGCAGCAGTACGCCCCATTCTATATATTTCCAAAGCAAGCTTCTCOAGAGTCTTATCATTTGAT  
AAAACCTCCGTCGATGTGCTCTGAAAACACATAGAACACGAAGTACTACCAGACTGACAAGACTTCGTGTTTTTTTA  
TTGAGACTGACTTTCCGAAT  
>locus0289  
GGCCGGGCATATGGCAGCTCGTATCTGCGTAGCCAGACAGCTGGAGTGACTCATGGTGGATTACAGTATTGCTTTGTTA  
TGGTCAATTAACATCTCGTGGTCCCATAACTACCCCGCATGGCGTCCCGTCCATCAACGGAGCTCCGACGCACACACA  
CGCCTGTGCTTGGCGCAGT  
>locus0290  
CCCACCTGGCCGAGTGTATGCAACGCGCCCTCCACAGGCGCGCATCGGAGCAACCGGGCCGTAGAAATTTATATTT  
ATCCCAACAGGACACTCTCGGGTAAACAGGGCATGATTGCAATCCCGTTCGTATGTATCCCGCCCTCTTCTCTCCCTCC  
CTTCTCTTATCGCAGCCT  
>locus0291  
GGCGTCTCATCTCGACTCGACTCAGCTCCGCGCAGCCCGCTCCGCTAGTCAATTTCTGCGATGATAAAGCAAAATAG  
ATAATGTCCGAACTTTAATTAATAACTGGACGGCTGAGCGAGCTTTTGATTACCCGAGAATTTAATTAATCGCCGCGAGC  
CTCCGCCCCAGCGCTTACCT  
>locus0292  
TTCTTCCTCTGGCCCAACAGTTCAGTTCCTCTCTTTCGCTCTGCGTTCGAGAACTCTCCGGAGACAATGGACAAT  
GGGACATAAATCTCGTAATAGTTGCCGATGCTCCCGGATCAATGTGCGATCTCCTTTCTCTCCCTCTCGAAAGTC  
CTGCGGAGGGGGCCCTCTC  
>locus0293  
ACGGTAGCTTGGCATCGCTCCCAAGAAAGACGAGAGGCGGACTCTCGCTCCCTGCAGTCTCTGTTTACGAAACGTAAAA  
CCGTGAAAAGCTCGAAAGAGGATTTCCGAACCTAACCTCGAAAATCGACGAAGCTGGCTCCCAACAGGAATATATCCATA  
ATGCGCGGTATAATGGCGTG  
>locus0294  
CCGCTGTGCTGCTGCTGCTGTGCGCTTGTGACTGCTTCGCGAGGTGATCGCTGCGCATGAACCGCTTGTGACAGCCGG  
CGAGCCGAATCTCTTTTCGCGGCTGGGTTGCAAGGTGCGCTGCAATTCATCCGAACGTGTGAACCGCTTGCACAGA  
AAAGCCAGTTGCAAAACAAACGGTGCCTCACCCGTGTGCCAGCGCAGGTGGGCTTCAGGTGGGAGCTCTTCCCGTAGACC  
TTGCCGAGCCGGGATGTGGCAGCTGTGGATGTTCTTTCGCGAGATGGACGCGCGCGGTCCGAGCCGCTCGGCCTC  
TTGGCAGTTGGGGCAGTCGCAAGTGGCGCT  
>locus0295  
CATCAGAGCTCGCGATTGAGTTGGACTTAGTTGATTTGATTTGCGTGTCTATTTAGTCTGTGATATTTTGTATAGAA  
CGCAGTGCACACAACCTGTCTCTCCAAAATGTTTATGCGAGTCAAAAACGTGAAGGGGGCCGTTGGACGGTGGAGC  
AAGTGGAGTTTACAAAGAGACTCTCAACCGCTTGACAGCAGCTGGGTACGTTGGCCCCCAAGACTCAAAATCCAC  
TCTCTTACTTTGATACCCCTTATT  
>locus0296  
CGCGCTGTAATTTGGTCTTAATAATCTCGTACTGCAAAATGCGCGTCAATCGAGCAGCGCCCGCGCTCTGTTATT  
ATCCGCGAGGATTTAATTAACAAAATTAATGCGACCCATTAACCGCACAGGGTCCGAACACTCGAGCCGCTCCGAGAA  
GGAAAGTGTGATGGCGGAC  
>locus0297  
CCTGATGATCGCGTATTAATTTGTGTGTGCGTTCGCTGCTGCAATGCGCGCTTTTTTCGCTCCCAACCGCTATTTATTA  
TTAGCACTAACGTGCAATTTGATGATGCAATATACCATCCGCTCGCTCAGGCTTTTCAGCTCCGCGGATCCAGCG  
GCGCTTCTCTCCACCTCTC  
>locus0298  
CGGTGCGCACTTGGCTACGTCAAAGAGGAGGAGAAAATATACCTACCTACCGCGTCTCATTCAATTTTTATCCCTA  
AAGCAATTCAGCATTTGTTTAAATAGTACTTAGCGGGTCAATGATATATGATGCGCGCCCTACCTCCCGGACTC  
GAGAAAGCAAAAGAGAGGT  
>locus0299  
GAATGCAGCGGAGGAGTAGCCCGCGCGCATCAACGGCAGCAGCTGTAATTAAGGGGGTGTGATGATGTTAATTCAAA  
GGTAAATTAAGAAATGTCGCATATAAAATCCGGTAATTTATGGTCATTGGAGATAATATATGTTGACAGCTTGTAAAT  
GCAAGCGCTCTACTTTCTC  
>locus0300  
AGAGGCCATACTTAGCCGGGCATCAGCCAGCAGCAGCGCTGCTAGTAGAGTAGGGGTTAATGTCTTTTTAGGTACGTT  
AATTAACAGTATTCAATTTGCACAAAAGTTTCTAATACGCACTGCACCGCTGCGAGCGAGTGTAGACTTAGCGCTCAC  
GGCACTGCGCGGATATTA  
>locus0301  
ACTCACTAATTTGCTCTCGCGGTGGACTCTCTGCTGAAGAAAATATAAATCACTTGAGGTTAACGTGGTGTGTTA  
GAAGCGGTTGATTTGATACATCTGAAACAGAGACGGGATCCTGGTTAGAAGAAATCGAAGCTTGCATAATTTGCGAGT  
GTCATGATTCAGGTGCTGT  
>locus0302  
CAGGTTGCAAGTTCGCGGAGCGCCCTCCTGGCGGACGGCACTCAACCGGGAAGTGTGTCGGCTCGGGCTTTTCAGGA  
GCTTTCAAGTCTTTTCGCAAGTTCGCTGAGTCCATAAGAGGCTTTCAAGAACGAAAGCGGAAACGGCTTTTTAATAGG  
GTCCAGGAGTTGGCTCCTC  
>locus0303  
GAAGGGAGGACCAAGCTCCTCGATTTTGGAGGGTGAAGATCGACTGGAGGGCGGGAGCGAACAGTTCGGCAGC  
CGCAGCCGCGTGGCGACTTCCGCTCGCGCATTTTCGCTAATTAAGATATTAACGTTATTTTAGCGTATTTTCGATACATC  
GCAAAACAAAACCTGCAAGT  
>locus0304  
ATATCCGACCCCTCTGCAATCTGTATCCATCAGAGCGAGTATCGGTGCGCCTCTCTCTCTGTTTTTCAGCGGGCAC  
TTTGTGTTTTCCAGGATTTCTAATCCAGCGCTACGTCGCAAAAAGGAAAATACCAAGCCACTACTGGCGGTTGA  
GAGTCGCGAGGTGGCTCGAG

>locus0305  
ACCGTTAGTGGTCTGCAAGTACTTCTGGATCAAGTAGAAATGAAGAAGAGAGTAACTAACAGAATTTAGTAATGGTT  
TACATGGTGTCAAACATGTAGACATGGTGCCATGCAAAATCATATACCACCTGGTTTCAGTAAATTTTTTAATATCT  
TTAAGATTAAATCTTTGGT  
>locus0306  
AGACGGGAGAAGTGGCGGCTGTGAGTTAGGCAACAATTGATTGAGTACTTGTCTGTGTGATGTGCAGGTTCAA  
AGCTTGGCACATGGCGCTGACCTTTGACCGGGTGCCAGGCGGCTGCAACCTACACAGGTGCAAGCTGTGCGGCAAGGTCG  
TGACGCATCAGGAAACCATCCACCTCCACTTCCCGCGAGGTTTGTGTTCCGCTCTGTCTGTGCGACGTACACGGCG  
AGCGACAACCTGCGCACGCACCTT  
>locus0307  
GATTGATTTTGTGCTGATCTGCATACAAAATTGTACCTGAACACTTGTAGTCCCTGATGCGCGATGCGGTGAAGCATCG  
AGCCGAGTGGTCCGAGAAGTGGCGCTCAGGAACGAGAAAACATCCCATTTGTGTGCGACGTTACGCGCTGAGAACAG  
CAAACAGTCTGCGCACCGA  
>locus0308  
CGATAATTAAGTCAATATAATAATTTGTTTATTGTATATTAGTGGTCTTTTCTGCTTGGCAGCAGTTATATTTCC  
AATGGGATCCATATTGATGAAATTTGGTGCCAACTTACCAGCTACCAATTCATCAAGTAGGCATTTCTACATTT  
TGTTGTATTAGCATTATGG  
>locus0309  
GTCTGTGCGGCTCCATGTGCGTTCCTCTGCGCTGGCGCGCTCCTCTCGGCGCCAGCAGAGCCACCTCGTCTT  
CGTTGTAGATCTTGAAGTAGGCGATGGTGAAGTAGATCACCAGATTTATGAAAGCGGTATTGGGATGGCCATCGCGTAG  
ACGAGGTTCAATGACACCTG  
>locus0310  
GAACCTGACCTTGACCAAGCCCCAGACATGGCAGTATCCTTGGCGAAGAACGTGCGATCGAGCAGCTCCATCGTCGCTC  
CTACGATACGGACAGCAATACGAGCAAGATTCTAGCCATGAGCGGCACTCTGTTGTAGTTGGCCAGGCTGAGGACT  
GGACGAGCAGCCGGTCACT  
>locus0311  
CGCTTATTTTCGATTTTTCAGTGACAGAGGTTGAGAAAGGCCGGAAGATTTTCCGCTGCGCAGCAGCTCGGCGCTGCGGT  
CGCTCCATGGCGGGGCCACCAGCTCCTGGCTCCGCTCAGCGCTGACGACATGGCACACAAGGGTGAATTTATGAC  
CTCTTTTAGCTCCAAATGT  
>locus0312  
TCCGAGGCGAGCCGCTTTACCGCGCTCTGCGCTGCGCGGACGGGGCAGATATGAGCATCGAACCGGTAGGGGCC  
TAAAAATCGATATTTCGGTCTTTGCTCCATCCGCGCTCCTTTTCGCGCTCTCTCCCGGTATATATGATCGAGCGCG  
CGCTTTACCGCTGCGCTG  
>locus0313  
TCTTAATTTACTTAAGATGTTGCGAGCAAAATCACCAACAGATATCCGATCAGGCGCCAGGTGAGGGACCGTCCAACA  
GTTGGAAGAAAGGTTTATATCCAAATCAGATCGCTGCTGTGCGCTGTGAGTTCGTGATCTGCTCTGCTTATTTTT  
TTCGATCCTCCTCTTTTT  
>locus0314  
CATTAAGCTAATCATATAAATGAATGTGAACCTACTTTGACAGCAGCAATAGAATCTGGTGCAGAAATGATCTGTGA  
CAGGCAGATCCCTCTCAGGATTAATATGTTAGTCCGCAAGTCTCAACTCTCCGATGTTTGGCGCTATTTAA  
TACTTATTAATCATGGT  
>locus0315  
TTTCTCCTCTTGTCTACTCCTCGTCTTCTCAACTACTCACATTCGATCTGTGATGTAAACGGCTAGGTTGT  
TGCTGTTTGAATGTTGCTCGCACTACTAAAGTAAAAACATCAATAGTTACTACCTCTGTTGCTCTGATTAGCTCCG  
TATTTCCATGCGATGGCCCA  
>locus0316  
TGATGGAATATATAGATGGTTTTTCTTAGAAAGCATCAGTTGAAGTCACTAACGTGCATCGGGCGCTCGTGGCGG  
CTCCAGAGCTTTGCTCGCAGATAGTCAAAGATAGGAACGTACGGGACCTGTGGATGTAACCGGGATGGACGAGGGCCG  
CGTGTGAAGTCCCGGGC  
>locus0317  
TGGCTATATCAAAAATGATAGAAAATCATAAATATACCCAGACCCAGCTCAGTGGCCACCTGTGCTCATCTTTTC  
CTTGTGTTTCTCGAGAGCGCGCTCCGCAACATCTTTGTTAACTGAACGTAAGCTCCCGAGTACTGCGGCGCGT  
AGTCTGCGGTAGTGAATCCCGTTCCGCAATATCTCAACCTGACCCACACATAATCAAGAACGATTTGTAGCTTAG  
AGCCATTAATTTATTTCTTTT  
>locus0318  
CGTCTTTGGCGAGGCTGTCTCGGAGATCTCTGGATAGGACTCGGTGAATTTTCGCTTACGTTGACCTCACATGCCGTTGA  
TGTCGATCTTAAGTTGCGCGTTTTCTCTCCTTTGGATCCTGCGAACAGAGGAAAAACAGCGTTACAAACTCTTTCTC  
AGTTGTGCGTCTGCTA  
>locus0319  
TTCATTCATCTACTCGGACCGAGTAGCCGCTGGTGTACGGGCGCTGCATGTATAGCAGTAGTAAAGGCCATTCAT  
TGATCGGTGATGCTCAATTTAAGATTGCCATCAATGGCTCTCATCTCGACCTATTTGGGTTCCCGCTGCGAGCGC  
GAGCGACGCGCGCTGAA  
>locus0320  
ACGACGGCACATCACGTTGGGATGACCTAAGCGGGCGCGTATAGTTGCGCGCTAACTGCGGCAAAATAGCCAATTGAG  
GGCTFCGATATCGCGGATATCTTATTACACACTGACCAATGGCGCCGACCTTAAAGCCTATCTAGTCCGCGAAGC  
TGCCGTTAGCGAACGATCTT  
>locus0321  
GGAGCGAGAGAGAACCGCTGGAGAAGCGAGAGCAAGGATGAGCCTGGGAGCGAAGTGAAGTACTGACGTTAAAGA  
CACCTCCAGCTCCGAAGAAATTTAACTAATATAATATAGGATAAACGGTTTATGCCAGAGCTGGCAACCTTCTCGCGA  
CGGATACTAATCTCGCTC  
>locus0322  
TTCAATGAGCAGCGCGACCTTGGCTCATCGTTATGTCGATCGAAAGATGATGCGAAAGAACTGGCGGAATCTATATA  
ATCGATCTGATTGCATTGAAGCCCGGTAGTCTGTGGCGCTGATGGCGATTCATAAATATCCATTAGCGCACAAATGT  
TGGTAATGATCTGCTGCGAG  
>locus0323  
AAATGTCAATATGACAGACAGTCCGCGTTCGCTGCGGGCTTACCCTCCGCGCGTCAAAGTAAATCATAGTTTG  
CTTAAATCAATGCGCGGTAAACGTCGAGTTATTTATGTCGCGCTATACGAGGACGCTCTCTCCCTCTCGCTCAGCC  
GCACGATCTTTGCACACAC  
>locus0324  
AGGGAGGTTGAAAACCGTTGCGGTCTCCGAGGGCGAGAGGTGCGGGAGATCGAAGGGGGACATGCAACAAGTAGTTCCG  
TTTTCAAAGCCATTGAAATGATGGCTTTCCCATACCATGACAAACTCTCGGCTCCCTCTCGCGCAGTCAAGCTCTC  
GCCGTATCCGCGCGCTGCT  
>locus0325  
TAGAGCAAGTTGGCGAATCTCGGAGGAAGATGACGCGGCTGCTCGGAAAACCTTTATTAGATATTTCTTCAATAGG  
ATAGAAATGCAAAATACAGTTGTCAAGTAACTCCCTTTTCATCGGGGAGCGAAGCGTCTGTGGAAGGAGTGAATGAGCG  
AGAAAGAAAGAGGCGACAGC  
>locus0326  
GCGTGTGCGCTCTGTTGAGCAGTGTAAAAATTTAGGCTGCGCTCGGGGACTATATTTACGAAGGAAATCGGTCG  
GTTGATTTTATAAATGTTGTTCAAAATATGCTTGGGAGCGCGGAGGAGCGGGGAGGGAAGTCCCGGGCGGAGAGC  
AGAGCCACAAGGCGCTG  
>locus0327  
GGTGGCATGTCGGGCGCGGGCAAGTGGCTAATCAAGGCGCAGTTGCGCGAGTGGCTTCAATACGGCTGGAAGGCAT  
TAATCTCGACAACCTGCTAACCAGCTGACCAAGCCACATAGCGCGCTATTTCCGATAAGCGACGAGCTTGTACCGCGA  
CTGCTCGCTCACTCTCTC  
>locus0328  
GGCTTTATCTGTATACAGAACGCGATCCGACCAATCTATCGTTGCACAAGTGTTTTGTGCGCTATGAGGACGACTT  
CGGTCATTTCTGGATGTTGAGCAGCAGCGGATTCGTAAGCGCGGCACTGTCTCGCGCGCGCCCGCAGGAATATGACC  
CAACCCATCACCACTCCACCCCTCTCCGACAGTAAAGCACTTACCACTACTTTTAGAAAACAAAAATTTATCT  
CGCTGCTGGCTGATTGATAA  
>locus0329  
GGCGCTGGCGACGATGCTACCGAAGGAGAGATGACGAGGGGGAGAAGATCGCGCGCTGCGCGCGGACACGAAAGG  
GTTGACGCTCAACCTTTTCATCGATTGACTCCTCGCCAGCTCTCCTTTTATCCCTTCGGTGCCTCTCTCGCGCT  
CTCCGCTCCCTGCTGCTCT

>locus0330  
TCCAAAGAGACGAGAAGAGGCTGGATTTCTCCTGTATAGGGGTATTAAATCCCTACCCTCAATTACCCTTTGTCTTGGGCG  
CAGCTTGGTCCACTTGTAAAGACACCCGCACTGTTGTCTTGGGGGCGAGCCACCCGCGGCGCTTCTCTCC  
AAACCGTCCGCCCTTCTTC  
>locus0331  
CGGAGAAAAGGCCAGGCTCAAAGTTGCTGGCGAGGCGGGCGGCGAGGACTTTGCGTCTGAGCTAGCTGCTAATTTAAG  
GGTTAATTCCTTAGGAGACAAAGTTGGCAGAGTTACGAGGAAAATATTCATGGCATTATGCATACGCTTAGCGCGCGGTG  
CGCGCAATAAAAAATTA  
>locus0332  
AAACCGTCCGCAACGAGCTACGATTTCTGTAATAGGGCTAAATACCGCTGACGTTTTTTGCTGTTGCAATATTATCATAT  
TTAGTATCGCACTTAGGAAGCCCGCTTAAATAAGCCGAGGAGAAGGCGCGCTCGCTGCTGAAGCAGCACTTAAT  
AAGTTCCAGTGGCCGACGAC  
>locus0333  
TATCGCGGAGAGACTCGGACTTAGCGGAGCATGAGTTACGACCGCTGGGCGGAGCCCGAACTCGCGGCACTAAAATCC  
CGACTGATATATATACGTATTTGCTCTCGTTTCGCTTATTTATACCCATATAACTTAATGCTCCGGTCCGCGCGGA  
GCCTGATACGCTCACTCTA  
>locus0334  
ATGTGGATAGCCACTCGACGTCCTCAATCCAGCTTCGCGTGCAGAACGAAAGTATAGAGAGGCCAAAGTTCGAGATGAT  
TGATGTGCAATGGGCGAGTTGTCATCAAGGAGCGAGCTGCTCGGTGACTATCTCTAGCTCTGCATCTGCCCGGGGA  
CAACATCAACCGCTCCGC  
>locus0335  
ATATACGTATCTCGCAGAGCGAGGCCATCGACCGGTTGCTGCCGCTGCAATATCCCGCACCAGCGGATATTGC  
CGTTTTATGATAATGTTATCAGCGCCCGGGCTTCGATGAGCTAACCGGATATACAGGTGCGCGCGGCACACACAGCA  
GCATAGAGGCTCCGCAAAAC  
>locus0336  
ACTTAGACACATCCCGCACTCGGTACATGGCTTACGCTTACGATAGCAAAATTTGCTGCAATGAATTTTCATA  
GTTTCGACAGCTGTAAACAACCGAATAGATTCGTTGGCACCACCTCAGTGCAAACTCCTTAATACCTCGCAGCTCTATAC  
TGATGCTCTGCATAGGAAA  
>locus0337  
AGTTGAGGTAGGTTGCGATGATGAGGAGATTCGAGAGGATAATGTTGACGCCACCAGAGTGAAGCCCGCTGCATG  
AGAGCTCCAGCGAGGCTCTCCATGCCCGCCCGCTTCGCGCTGCATCCCCCGGAGCGCAACTTATTTGAGGTTGCC  
GCGCGAGCCTTCCCTCCT  
>locus0338  
TAATAAATTTTGAATTTGATGATGATATTAATAAACAATTTGCTTATTTTTCAGATAGAATAGTGGCATGA  
GTCGATTAATCTATGGCAGATCAACAAGATCAGTCTGCTCCGGGGGTCTGTAGAGAAGCCAGTCTTACGACAGCGC  
CTTAAGCTTAAGGGAAGA  
>locus0339  
CAATAGCGAGACAAGTATCGGCTGAAAGTAAAGCGCTCCGACAGAGGTCACCGCCCTCGTGTGCCAAGTGGACGTTGA  
GTTAGACGCTGTAGACAGAAACAAATAAACCTCCTGTGTGGGATAAGAAATGTATACGGCCCAATCACATCAAGAAAATG  
TCACAGTGGTACTGTAGTACGCTCGTGAAGCCAGGTTTGTATGCTCGATGAACAAAAAATAAATAAATTCGCT  
AACAGAGAGAGAACC  
>locus0340  
GACCGAGCGACACGAATATCCGAATTTATTTGCTCCAGTCTTGTATCCATTAATTAAGTGTATCTTCACTGGA  
ACGGTGCTCTATCACATTTTAAAGAACACGGTTTCGGGAGCAAGAAGTGGTATTCAGGACTCCGAGACGGCG  
GACGTCGTAAGCAGTACCT  
>locus0341  
CTCGCCCGTACTACAGCCCGCTCGCCGATGCAAAATGCGCGTGCACGAGTCTGTACCCGATAAAAATGCAATTTGGGT  
CATAGAAAGGGAATAACAACCTACAACCGGCGAAGGAGGAGAGCCGAGCGGAGCGGAGGCAATTTCCCGCGGA  
AATGCGATTTTACGGCGA  
>locus0342  
CCACGGCGAGTGTGAGGAGCAGGAAACGGGTTGCTTTGTTGGAGTAGAAGAAGCATGCCTCTACAGTCCCATCAATC  
TCAGCCGAATCATGCCCTGACCCATCCAAAAGAGGACACGGCAAGAACAGGAGCAGGACATAAAGCACATTTGATAC  
ACACTAAAATTTGTAATAATC  
>locus0343  
GGTGGCGGACCTCGCTTCAAGCCGCTCGCGTGTACTTGGTTTTCTTCTCCGCGTGCGCCCTCACTTTTATATCCA  
CCTAAATCCATCCATTTTAAATGACGGATATTTTCGAGCGCGGAGGAGCGCCAGCAGCGAGCTACTCGCGGC  
TCCAGACCGTATGGATTTT  
>locus0344  
AATCACGTTGACATCGCTGATGGATGTGCTCTCCGCGTGCAGAAATCACCTCAGTTTTCCCAACAATAAAGCCCAT  
TGTAATGCGAATTTCCGAATATTAGAGCGGGAGAGATAGAGGACGATTAACCGCGCTCCGTCATCGCGCTTGC  
GCACCCGTAATCCTTTGAGC  
>locus0345  
CGGCGAGCGCGGCTTAAAGACTCGCGTGTGCTCGGTCATTAGCATAGAAAACAGCGGTAATACTCGGCTAGCTTACCG  
AGCTAACAGCGTGTAAATAACCGCTAAGTTGCCAAGACAATGTGCGCGCTCCTTGGCGACAGAAACCGCGGATTAAT  
CCTCGAGTTGCCGCGCGGT  
>locus0346  
GCTTGGCGATGGCGTTTTCAAGGGCTCTCGCAATCATCCCGCTCCTCTGCGATGCGGTTACGGCTAAGAGCCTC  
CATTACCGCAATTTGCAATGATAGCGAGCGAGCTCGAGTTCTGAAAAGCGGTCGAGAGCCCGCGCTTTGTTATCTCG  
GCCGGGTCAGCTGCAGA  
>locus0347  
CTCGCGCGGACAGTGCAGCGCGAGGGGCGCGGCGGACCGCCACGTAATTTGCAATGTGCTTACGCGGTAATTCG  
ATATAAATTTGATTAATATCTTCAATATAGCGCGCGGAGGCTCCTCGCGCGCGCTGATGGAGGGGCGCGG  
CGACCAAGACGGAGGCTATC  
>locus0348  
TGTGTCGTCAAAGGACGACGCGCTCCTCGGTCATCCCGGGAAAAATAACAATTTAATCCTCGCGAGATCTAAAC  
GGTTGCCAATCATTTCCGGTTCTCGGATTAGTCCGCGAGAGAGAGTACGAGCAGGGGCTGAAACTTTATTTTCGCT  
GGTCCCGCGGTAAGG  
>locus0349  
CGCAAGTGTACGAGCAGCGCGGATTTATATAGAAGTAAACCGCGGCTGTAGATGTGCGCAGCGTCAAAAGCAAAGCT  
CAGAGGCAATCATGAGCTTTCGAATGCAAAACAGCGAGCGCGCGGCGAGTATGGCACTTTTACATTTAATGTAAACTC  
GCAAGTGCAGCGCGGAG  
>locus0350  
CGGTGCATCCGCTACTGAATTCGACCAATGGTAATGAAAAAATAAATAAATAAATACCTCGAACACTGCCTCGTTGCTGCAT  
GTGGATCGCTTAGCAGCTTAGCCACTGTCCGGGCCCCAAGTGGTCCCTCAAAACGCTCACTGTGCTGCTACACAGACA  
GCTCGGACAGGTAGACTCATTTATGTAACAGTTTTTATCTTATCTCAGACCTGCCTGTAACCTTCAATTTGCAAGTTAG  
TAGTAGTGTACGTG  
>locus0351  
GAGCGCAAAAGAGAAATGTATTTGTAATCGGCAGACAAACTACAATGATGTTTGTGCTACCGTCAATGAACAAACGG  
AAACACTTTGTAATAAAGTAGATATCCATAGATTAATAAATCCGATTTTTATTTAGAAATGGATCTTAAGAATTTATG  
TTACTGTACAACCTGCTCA  
>locus0352  
TTTAACTTAAACTCGGAGCGCGCATCGTCTGACGCTCAGCGGACGCAACTATTTGTTTTACAGTAATATAATAC  
ATAGGATTTATATAGAGCAATATATACAATAACACATACATAACCGCGCTCTGACCCGATAAAACAAACAGCGCACT  
TCCTTATGTTTTTCCCTT  
>locus0353  
AAAGAAAGAGATAGAGAGAAAAGTTTGGCGAGGCGCAAGTTTTTTCTCGCGGATACCTTTTCAATGAGTGAAT  
CAAGTACCAATTTCTACCTACGTTTAGGGAAGTACTTTTTATTTATCTGTTTTACCTTCGACTATTCCTTTGTAAT  
GAGATTGGCCCGCGAAGC  
>locus0354  
TGATGACGATGGCTTTATGTTACTGATGAAAGTTTTCTGCTGTGTTTTCAGGAATTTAGACCTTACGAGCAGCCCGT  
GTAGCTAGACAACATGAGCTGTTTTCAAGACCTCAAGTTGAAAAGGAGAAAGGTCGACTCTGATGTAGTACGCGAGT  
AAGTCAGATGTTCTCAAT  
>locus0355

TGTATTGTGACATATTAATTTTGAACAATTTTGAAGCTGTCCCCCTGGTTATAGACCGAGTCAGAAATATGCCGAACCGTTCA  
GAGAGGCAAGTCGATGGTTTGGATCTTGTAGTTTTTTCACACCCCATCATCTCAAAGCGATTTTTCTTCTGCGATCTCT  
ATTAATGAAAAGAGGATCA  
>locus0356  
GAGGCACGTCGCAAGAGAGGACATGAATTTCGGCGTCAACGGAGTGCCAGGTCAGCCAGTTCGAGCCGCTGAGCGACTC  
CTGCGCGGAGAGCGACATGGAGGGCCCTCAGCTCTCGCTGTTTCAGCCTCAGCCGACGCGAATTCGTGGTGCAGACGCC  
GAGTTCACGCCGGCTTCTCT  
>locus0357  
CTACTACTCAATTATTATCGCTGGGAGCAATGATGTAAAGCTGAGGAAAAATGACTAGGTTCGATGACCGTGTTCGCCGAA  
ACAAACGTTGGAGCTCGACCTGCGTATGCTACGTTCTTCAGGGTACTCAGACCGTTAAAGCTGGTTTCGAAAAATCCAAAG  
TGAGTCAAAGCTCTGGAC  
>locus0358  
GACGCCACTCGACGCCACATAGAAGAAGGAGCCGCTAGCGCTCTTGTCTCCGCTTCGACCAGTAGATTAGTTTTGT  
TCGAGGCAATTTGAATTTAGATTAGTTTGTTCGAGATTTGGCGCCGAGCCGATCGCCACGCGCAGCAGCTCATTATAC  
TTCTACCGTGCCTTCGGAC  
>locus0359  
GTATGTGAGGATTTTGTATGTAACCCGAAAAAGAACACATAGAACAAGTCCCGAGTACGTCAGTCCCTTACCTTCAA  
AAGTAAATGTTCTCCTCAAAGCTCAATGACAGGAAAAGAGCTGATTTGTATCCCAAGATAAACCAGAAATAGATTATTTT  
CATCATATTGGCGTGTATCC  
>locus0360  
TCGCACCTCAACTGGGAAAACCTTAGGCCAAAGAGATGACGAAGACTACCGTCACGAAGAAGCAGTATCAACTAGGGGGAG  
TAATCTACCATCTACCTAAACCTACTGTCTTCTAGAACGACGTCGTTGACTGTGTTTATTATAGAGAATAGTGT  
TATCCGTGGGACGATTATC  
>locus0361  
TTCTGTAACCTTTTTTCTCTTCTTACTATGTCCTGTATGTCGGCTTTCTTTGTTTCTAGATATTGCAGAACCTA  
CAAAAACCGCACTGAGCGGAGGGGGCGCTAAGCTCTGACAATATGAATAAAAAGAACTGCTGGTTTCAGCAAAAGCGA  
CCTTATTTTAAAGTTAACCAGCTTGAACGAAAAGCAACAACAACAAAAATTTTTGCGCTCAAGCTCTCTAC  
CCAGCAGCTTGGC  
>locus0362  
CTGGCAAAAAGCGAAACCGGAGAAGGAAAAGCGAGCCAGCCAGCCGCGCTGTCTATACCAGCAGGTAATTTAGAGGAT  
TAATCTTAAAGTCCGTAAGCTCCACCACTTGTGGAGCTCGGCCGCTTACTTTTCACGCTGTGACTGCGATGAGAAAGT  
CCGATGCTGATGCTGGGATC  
>locus0363  
ACTAGCATCAGCGGAGCATTAAACCGCCGCCGATGAACTGTGGAATTAAGTAGATTAGGGAATTCGAGGATCATT  
TAATGCTTGGTAAATGCGTAAATGTGACGCCGAGTGGAGAGAGTCGAGTTTAGGATTAATAAGGTGATGCGGGT  
TTGAGCGAGCCCTCCGTT  
>locus0364  
GTATAACCGCGAGAGGAAGAGAGCTGCGAGCGAAAGTGTGCGCTGTCTCTGCGGGACGCGCATTACATTTGG  
CAGCGATTTCACTCAGCGAGATTAAGCTTATTTACGCTGCCCTCTCTCCCTTTTGAAGCTTTCAAAGCCGCGCTTCT  
CTTTCTTTCTCGGGCATCT  
>locus0365  
TTGCGCGCTATACACTATAGCGGCCCTACGGCGAAACGCGGCTGTCCCAATAATCCCGAATTCGACGGGACAAGTGG  
CGACCTGGCCAGGTCCAGTGGTACTTTCCGCGCTCGCAGCATGAAAGTGTTCCTGATTTCCCTAGGTCCGGCGCG  
ATTTTCTTCTCCCTCCAGCA  
>locus0366  
CCGGCGGTATTAGTTATCGTTTATCAGAGCGGAGCGCAAGCAGGATCGCAGCCGCGGAGCGAGAATTTGGTGTAG  
CCATCTGTTGCCAGACATGATCGATAAAAAGTACCGCAAGTGTATCAGTGTAACTACCACCTTTCGGCAGCATGCCCTC  
GTATTTCTCTATGCTGTATC  
>locus0367  
GGCGCGCCATCCCGCACATCTCTCGCTCGCCAGCGCAGCTACCCACCCCTTGGCGCGTCTCTGTCTTACTG  
GCAAACTTAATCGATATTTACAGTTTCTTACCCCCACCGCCGCTCTGTCGTCAGCCGAGAGGGCGGCACATCT  
TCACCTTCAATCGCACCG  
>locus0368  
TAGCTCCAGTTGCTTTTTGTAGTGAAGGTGAGACCGTCCCATTTCCAATCTGGTCGGAACGCGCAACACATCTGG  
AGAAATAGTATGACGGTTTTCAACCGGAGAGGTACCACCGCCGAGCTTTGGGTGCTCTCGCCCGCTGTAGTAGAG  
CTCCAGGAAGCGGTACCTGC  
>locus0369  
TTATTTTATCATTTTCATAAGATCGGTTTTTATTACTTCTGTTTGTCAATCAGTTTTCGGTGTGTGTTGTTTACAGT  
GCATCGCAAAATGGACAGTTCACCGATTGTGACAAACCCAGCTAAACAAGCAAGTCTTCGCGTAAGTTGTACATGC  
ATCCGATTTTTGTTTTGTTT  
>locus0370  
CTAAGGATTGCACCTGGTGAACCTACCGGGCTGCTTGTGGGATCTTATTGAAGCAGTTTTGAAAAACCTCGTAGAGAT  
GCATCGGCTCGTCTGCTGCGCCGCCATGTTCCGAACGAACGTCCTGTAAGCAGCGCCGCTTTGCGCGAGCACCGCCG  
AGCGGAGTACGTACGGTG  
>locus0371  
GTCCGAGCGCGGCTTTTGCACAATCAGGCTTGATGCCAGTTCTGCCCCCACTCCACTCTCTCACCCCGTGGGATT  
GGTTGGCAATTAACAAGATCGCGATAATCCCGCAGACTTGGCAGCAGCACTCGCGCCACCCCTCCGCGGAGAT  
TAACACTTACCGGTGCCAC  
>locus0372  
GGCGGTTGCAGTGGGTGGCGGAGCTCTTACACAAACCGCGCGGGCGGACACACATCCTAAGATGTGATT  
TCAAATAATGGCGGATGCCCCCTATGCCCGCTGCATACAGGAAGGAAACACATTCGCGTGAGTGTGCGATGGACAAA  
GAATATGGCTTTCGTAGTCCGTGAGTGTTTTTTTTTTTTTCGGAGCTATAGCTGTATACACTATGGCTTTACTGACGTG  
TCATAGCGTATG  
>locus0373  
CTATCCCTAGACCGTGGCTCATCGTATCTCCCTCTCTGTCCTCTCTCTCTCTCTCTCTCTGTTAGGCACTTGACCTGACAA  
CGTCAAACACTGGCAAGTTCAGATCAAGTTAAAATAAGACAGACAAAATTAACCGAAGCTTTTAGTAGTACCAAGTGT  
ACTACTATTTTTTTGACTG  
>locus0374  
GCTATGCAACGAATATCAAGGGTATTGTTTTGGTAAAGCAAAATGCATCTAGCTCTTACCTTATTGTAAGCATTGAACT  
GGCATTTTAAACACCATGCTGCTATCCATGTAGTTTTTACCTGGTTCTCGCTGTCTATCGTGTGAGATTCAGAAAGTGC  
AAGCTCCGCGAGCCTTCCCT  
>locus0375  
TCATGAAATCTGTCATCGTCAATTTAATACGATTCATTTTTTGTCCAGAACTCGGACGCGGATCGATCTCTTTGA  
ATCTTCTACCCACCCCTTGCACGTAATGTGAGTTCATGTTTTTCTGAAATTTATTTTAAATAATGCCTGCTTGA  
CGTTTTAGCGAATTAATACTC  
>locus0376  
ACGAGAAGTGAATTTCAAATAAGTAAATAGTCAATACGTAAAGTGCATGAACATTTTGTCTCAGCGTAGCAGTCA  
TGAGTTCCGGTAAAGTTATATCGTAAATTTTCGTTTCTTTCTGGAAAAATGCACTGATTTATACCGCTTTTGTAT  
AACACCCGCTTATACTAG  
>locus0377  
GTCTACCCCGCTTCTCTCGCTCGTCTCCTCGTTCAGTTCGTCATCGCCGCGCGCTTCGACGAAAATTCGATC  
ATTATGATTGCTTATGATGTAATGATGCCCCCGCGGCAAGTTGTTTCCACTAGAACGACCCAGTGTGTGAGAGGCTG  
CTGACGGCGCGCCGCGCA  
>locus0378  
GTCTGTTCTGTTACAGTGATAAAATAAATGATCGGTGACCAACTCGTGTATTTGTTGCTTTCAGATATGTACCTT  
GGTTGAGTGTGTTGATGTGCTGGCTGAGCATTTTTTCATGTAAAAAGAGTATTTTCAGCGAAAGTATATTCTGTGACT  
CTGAGGTGACTACTAATAG  
>locus0379  
GCTATTTCTGTACTGCAGAACTCAGCGATTTTTGTCGGTCCGCGGCAACAGGAAAGCTGGCCTCCGCCACGCAAACG  
AATATTGCCAATAAATGCCAATCCAATTTAGTTCAGCAGAAAATACTGACGCTCGCTCGGCTTATACGGCTCAAATC  
CAATCGTCGACGCGCTTTG  
>locus0380  
TTTTTTTTGTTACGAACAGCCGACCGGATCGGTTATTTGACTCTGCTTTTGCATATTTTCTTGCAGTACTGGACA

CCCTCCCGGTGTGCCAAGATTTTAAATCGCAACTCTGCAACCGTCCCCTGCAAGTTCATCTCCATGACGGTGAG  
TTTTCGATTCAACCTCACAT  
>locus0381  
TGGCCGAGGGGGCGAGGAAGTGTCCGGGCGCCCGCTGGCGTGTTCGCGCTGCGAGGCGGCTACTTGTAGTTCGGA  
TGTTCCTGCATGTGTATGACCTCAGCCTCTCGCCCTCTCGACGAAAGGCGCCCTGTCTGAGGCGTCAGGCTCGCCA  
CTTTTTCTTGGAAACGCCC  
>locus0382  
ACCAGCAAAGCTGATGACTGAGGCCCATATTTTGTCTTCTCCGAGTATAGAACAACCTTCTTAATGGTACTAATAAA  
CCCAAAGTGCCTCTGGTAGATTTTTGGGCATAAGATTGAGTAAATAAAACTATCGATATAACAATTTTTTACTAGCCGA  
AGGGCAAAAATGAAGGCGA  
>locus0383  
TTCTGTTTACACGAAACGGGCGCATCGTCTGTTTCTGCTTCTGTTTTCAGTCCCTCCCAAAGGTGCCACGATCCCT  
TATCCCCCAAACCCAAAGTTGGTGGCCAGTATCCTGGCTGGTGGCCAGCCCTCACCATCCAGGTAATACGCGGT  
GCCCGCCACTCGGACGTAAGTACAGTAATGCCTATGTCCGCGCCCGCCGCTGCCGGGACAGCCCCCAGCCGCTCGC  
TCAACGGCCAA  
>locus0384  
CTAAATGGCTGCAGCATCAGAGCTTCCCTCCGACAGCGGCCCCCAATTCAGGCGCGGGGAGAATCCCAAATGATCG  
CGAAATAACCGCTCACTTATATCAATTACCGGGCGACGGCTTTATGAAGCGCATTACGCGTGGCGACGACTCGAA  
GCTCGAGCGCCACTAAAC  
>locus0385  
CGGGAGCTTTTTTTCAGACGATTCCGCTACTTTCCGGGGGCTCTTAGCGACTCGTCTATGTACCTATTGCGCAA  
ACGGGAAAAGAGCCTGACCCATGAATGAATGGTGGAAAGAGGGGATGAGATTCTGAAGAAAGAACATCAATTCATTT  
CCTTATACGATTGCCATTAT  
>locus0386  
AAAGCGAGAGTGTATGGTATTGCACGGGAAAGCCGGCGATAAGTCTGTTAAAAACATGTAAAGCGTACCTAATCCAACAT  
GGAAACACGTAGACCGCTTTGCCCAAGTTGCGGTAGCGTATACCTGGCGAGGGTGTGCTGGTGGTGGTGGTGGTGGT  
GGCGGCCAGACAGTTGGC  
>locus0387  
CAGCCAGTAGCAACCGCACCCGCGCTACCTTGCATTTGCAATTTGCAAGTGTATATCTCCGAGGGATACCTTTTGTGTGCT  
ATGTCCATCCAGAACTCAACACATTCGGTAAGTTAACATTTACCCAAATCTATATTTGCTACTTTCCGCATCATATT  
TTGGCAGAAATTTTTGGCC  
>locus0388  
TGGAACGTGCCAGTCCGAGCTGGCTAAAGCTCAGGCGGCGACGACAAGAGTCAAGGAGCTCGGTAGGATGCAACTG  
GAGATCGAGAAGATGTACGAGAGACGACCGCGCAGCAGGAGGTACGCAAGCAGCAGTCCGAGCCGAGAGACTGAG  
GCAGGAAGCCGAGAATGCCA  
>locus0389  
AAGAAAGGCAATGAAAGCCTATAGAAGCATCAGGAGGCTGGTAGTAAACCGTTTAAATTTATGATTGCAGGAGGGCCG  
GGGGGAGTGACAGACATAAGCGCAAGTCCGGGGAGGCGAGTGTCTGTAACAGTTCGCGCCCAAGGAGCCTCCCCCTA  
TGGTCAATCAGGGAGACTTC  
>locus0390  
TCAGAAGCGCGGAAAATCAAACGGTCCGACGCGCGCACCGCCTCTTCCGCTGGGGTTACGCCCCGAGTTTACG  
GGCTTCCCTCCGCGGGGAGCCGCCCGCTCTTTGACGAGAACTCAGGAGTCCGCTGGAAGTGGAGCCAAATGAGACGA  
CCGATTGCTGATAGGACAG  
>locus0391  
GGCAGGAGAGAGGCACTCTATCAAAGTAGAGTACATTTAGCTTGGTTTATTTTTTACTTTGGGCGGGGGTCCAAATGT  
AAAAATCAATCTTCCCTCAATTTAGAAATGCCTTGCCTCAAAACATTTGGCTTTTGGCTACCACCCCTGCATGTGCTCAC  
TCTCGCTCTTCCCGCGCT  
>locus0392  
GATGTTTTGCATGCACCCCAATTTGAGTAAGGTAAGCCGACGATGTCCGCGAGCCATGACGAGTGCCTGTCTCT  
TGTAAGTGGTCCCGTGTGTCAGGAGTTCGCTTCAAGTCCAGCCCAAGCAGCAGCAAGGTTGGCACCCCTCGA  
GAACCATCTCAACGCGAGG  
>locus0393  
CACTCTAGACCGTTGAACTAATGCCAGTCTCTTTGTTTTCGAAATCTCTACGGGATCAGCGCAACAGGACTTACGCT  
GGATTTTTACTTCCGGCAATTTGAGCAGGATCCGCGACTGGCTTTCAAAGCGAGCCGCGCTCGAGATCTCAGCGTCC  
GCTCGGAGTTCAATCAAGAAC  
>locus0394  
AAGCGTGTGTGTGTACCCTGCGGGGAAAAGGCTGCAGCGAAGCGCTCGGAAAAGGCGAGGAAAGTCCGAAGTGG  
AGAATTAATCTGATTTCAACCTCAATGCGCTGCAGCAGCAGCGGCGGAGCAGCAAGGGCTTTGGGAATCTCAGTCA  
CGAGCGAAATCCGAACCTCCGCGCTCCGAGGCACTCTGGAACGCAATTTAATTTTAGTCTCGCGAGGAAATCCACC  
TCTCTCTCTC  
>locus0395  
GATGTCGAAGGTCGGCCGAAGTAGGCTGCCACTGCTTGTGCGGCTACTGGGGCAGTCCCTCAGGCGGTGAACAGCT  
GCTTGCTCTTCTCGAGCAGTGGCAGAACTCGACGACGACTTTGCGCTCGTCTGCTCCATCGCGCCATCATGACCATG  
ATGATCTCGGCGGCTCCTC  
>locus0396  
GCCGGATTCGACGCTACGAGAAGCGCCCGGAGGCTGGGCCCCCGGAGGTTCTCAGGCTCTGACTCAACTCCT  
TACTCATGCACACACAACTCCACCGTATGCTGACCCTATATAGTTGGAGTATGCAATACAGTGTACCATAAAA  
TGCTTTTTTCTTCTTAAT  
>locus0397  
GATAACCATTTTATATCATCTACCAGTACGATTCGAGAAGTCAATTAATAGCTCTGCAAAATCCAGAGGTCATGCCCTC  
TCTTCTGTTTTTTGAATGATATACCACTATTTTGCAGCATGTCTATACTATCTTGGAGCATACATATCTTCCCTGCAGA  
TTGACATTTGTAAGTATAG  
>locus0398  
TACACGATACACAGCACTGGAAAACAGCGAGACAGGCTCGAGACCAGGAGCAGGCGGAGGAGGGGAGGAGTGC  
TATTTCAATGGTTAATTTGGCTAACTCGATTTCGCGCCCGCGACCGCTACCGCTACAGGTCACCGGAGCCGCTAAACTGG  
CTATGGCCCCCCTTATTC  
>locus0399  
CTTCAAAGTAAGAAGGAATAGAAGAAGGTGAAAATCGAGCACCAGAGATGGCTCAACGCTACAAAATATTACCAAGATT  
CGGTGGGATGCTACTGACTTGGTAGAGTGTCTAATGAGAAGTGGTTTACAAAATAGAAAAAATCAAAAACGATGT  
TAATCGAAGAACTCAAAAT  
>locus0400  
TCGTTGGTTAGGTGATCCGGAAGCAGCGTTTGTCTACTTCTCTTCCGGCATAACCGTCAACCTGTCTGCTCTTCTCT  
CTCTTTGTACGCTTTTGGCCGTTTCTTCCGCTCGGCAAGTTCGGCCCTGTCAACAGTCAATGCTCGTCTGCTGACGCTT  
CTCTGTCGAGCATAAGGG  
>locus0401  
CACTAACGTTGAGTCTGATCAAGTATGCTGCTGATGGTCCGCGCTGCCAGACTCGGGGACTCGTCAAGAAATCAAAAT  
GGCTTGTCTCTTGTAGCGCTCTCGATGGCTCATCGGGCGGGACTTCGACCCAAAGACCCGGGCTTCTCCGACGAGGA  
GCTCAAGCCCCAGCCATGA  
>locus0402  
TGAACCGAGATGCTGGTAGGCGGATGACCGTACTGGCGTTCGGGTGCTGGTCAACAGGAGACGTTCTCTTCCGCC  
ATAGTCTGCTGTCTGCGCATCTGTTGGTCCCGGGGCCCCACTGTGAGGACATCTGTAAGAAAGAAAAACGAGAGCTTTGC  
TTAGTGAACGAACATAATC  
>locus0403  
GGCCAGCCTACATCTCTTTGTTTTCTCTTCTGATTTACAGAGTGCATGATGGACGAGGGAGCGCCAGTGCATCTT  
CTGGAAGTAGGAGGACCGGTGGCGGGCGCTGCAAGGTAACCTGACTTCCAGGAGATAGCTAGAGAGTCTGCTTCTTAT  
ATCAATATCTTACCGTCCCA  
>locus0404  
AAAAGTGAAGAGAGAAAAGCCTGTTCTCTATAGTCAATGTGATTCATTTGCTGGGTTGCTTCTTCTTCTTCTTCTT  
ACCTCAAAATCTCCAGCTTGGCTGAGGAACACAAGAGCACACATTAGTACCGCAGGTAGTAAAGTCAAGATCAATCA  
ATGGCGAAATACAAAAGG  
>locus0405  
GAGAAAGTGAAGCGAGGCAAAAAGAGGGGGTGGAGGCGGTAACCTGCGAGCTTGTAGAAAGGTAGCCATA  
AAAGTTTATGCTCTCCATATGTTGTAATATAGTTTCAGCCAAAGAGCGGGAGAGAGAGAGAGAGAGGCTTGGGATCG

GTAAAATATCGGGCAATAAGTATGGATTGTTATTAACACGGTGCDCGGTGTGTGCCGCTCGCTTCTGAATCCAT  
TACCTCGCATGGCGGCTGAATAACCGGGCATATATCCGAGCGCAGCTGTGTATACGTGTATACATCGCGCGCA  
CCGCTGTGCTACTGCCGTGCCG  
>locus0406  
CACGCCAAGGAGAGCCCTACGCGTGCDCCTATTCGCGAGCGACCTTCAGGCAGCGGCCATCTCAACCAGCATCTGG  
CATCCACTCGGTTGAGAAGCCATACCAATGTCGGAGTGCGGAAACACTCCGTCAGAAGCGATCTGAATCAGCAG  
TCCGCACACCAAGGGAGCATTCTCTCTGCCTAACCCAGACTCCCCGAGGAGACCAGGCGGACAGCGCCGATACT  
ACTACTGC  
>locus0407  
TCATCATTATCTCGCGAGCGGCGGGAGATCGGGCCCGCCGATACAGTGGGACGTTTAAATGGCCGAACCATGTTGGAA  
TTAACCAAAAACAAGACGAAGCATCAATTAGCGACTTTTCTTCCACTTGACTTCGCTCGCTCTCTCTCTCTGCA  
GTTTCTCTGCTCGCTTT  
>locus0408  
AGGCATGACATCGTTTGAAGGTTGTACACACACAGTATACGTACGCTAAGTCCGCTATCTCAAGATCTATCTGAAT  
AATAACGTGTACGACAACATGTCAAAATTATACGGAAACCATGAAACACTGTTTATACCCAGTCTCGGATTTCAAAGCGT  
CGTGTCTCGACGCTGATGT  
>locus0409  
GCAGCGGCTCGGTTTATACATTCGATACATAAATGTATGTAACCTTGCGCGCGGTAGCTTCGCTTGGAGTGGGCG  
TCGGCCATCTGTCTCGGTGGTATGACCGAGCGGCCCTATACATATATACATCGTGTGTCGCGCGGACATACGATAT  
ATCCGAGAGAGTCCGAG  
>locus0410  
AGAGCAATGCAAGAGAGGGGGAATGCCCGAGAGTATACAGATATAGATAGACAGCTCGAGATCGAGGCATTACG  
GATGTATGGGCCAATTTGTAAGCAATCAACTTATGCTCGATCCGGGAGGAGGCTGCAATATTGATTTTTACCGACT  
TATATCCCTCGCCACTAC  
>locus0411  
GCTGGGAATAATAAAAACAGATGCTTGCAGCTGGGTTAATGAAACCTTCAAAGCGCAGGAAATAGTAAAGCAAGA  
TGCCTTAAAACAGTACAAAAGGTGGTAAAACAAAAAATTTGGTCAAAGGCGAGGCACTTTTGTCTAAATAAGTAAA  
GCTATTTTCTAATACTTAG  
>locus0412  
CAAGCAGGCTCTGGTTCAGCTCCTGACTCTCAGGAAAATTTGTCTCTCGGCTTCAGACTCCAGTATCTCCAGGAA  
CCCTCTCAGAGGATCTAAATGTAAGTCTTTCATGTTTCATAGCATCTTTAAAACGAAATTTAAAACACCAACAAAACGC  
TCTCTGTACACTGTCTCC  
>locus0413  
CTGATTAAGACATGTTGCCGAGAGAGCGGCGCACCCTTAAATGCAGATATGTGGATTTGGTTCTGAACTGGCATTCA  
TTTTAATGGAATTTGTAATAATAGGTATACGCCCCGCGGAAAGTCTTCTCTCTCTTTACTGGGCTCTGCT  
GTACCTTACCCTTTGTTA  
>locus0414  
ATGATGTTTATGAATACCCGTAACGAATCGCGGTCGCCCCACAAGGATAATGCGAACTATGACCGGTGATTT  
TCTATGCTGAAAATTTGTTTACGCCTATAAACGCAGCTGCTGCGTATGGGACTGACGAGCCACATTTGGCGGTAAAA  
GTATAATGACCAATTTGCCG  
>locus0415  
TTAAATGCCCTAATAACTAGCTGCCGGTAACTCTCTACTCTCTCTCTCCTCGTGATGCTAGTCTAATAATAAT  
ATCTATCGTTTAAATTAAGATGATTTACCGCAACTCTTCTCTCTCTACAGCGCGCCCAATCAATCAGGAATTAATCC  
TCATTAGTTCGAGTACGTC  
>locus0416  
TCGGCCAAAAGTTTGTCCGGCTAGTCCACAATGCCTCCTCCTGCGGAGGAGGAGGCTCTCGAGACTTCCATT  
TTGACTCTGGGATTAGGCGTACTCCGCCCCGCTAGCCCGCTGAGAAAATTTTGTCCGCGACGCTGATGTGTACAC  
GTCTGTGTCAGGGATACCC  
>locus0417  
GTGCTTTGAACCTTAAATGTTTCTCTCGTAAGCAAACTAATGTGATGTTTTTCAAAGGGAAGTGAATTTTTTAA  
CTTCCAGGAGCAGGTGGGAACGACATTTTTGAGCCCCAGTACGGTGTACCAACCTCTACGATTTTTGTTGGTGCATC  
AGACATAAAACAATTTTTGAACATGCTGCAATTTTTATATGAATGTGTTTTTGAATACTTTACAGGAACGGATCTCGCT  
CTCTCTC  
>locus0418  
GGTCTCGGGGTTGCCGGATCGTGGATTTGAAAGCAGCTCCGAAGCCAGCCCCAGCAGTATGCTGACGCTGCTGACG  
CAACGCGCTGGATCGCTCTCACTTTAAGCAGCTGAGTGTGTTTTATATACACTTCTCTCTTTTTTCCATTGTTTTCC  
CTCTACTATTTTTCTGAGCC  
>locus0419  
AAAAACGAAAAAAGATTAAAAAAGCAGATAAACTTGAACCTGGAATGGAGCATAAGGTTTAGATTAGTGTATACA  
AGGTACGACAAGCATAAATTTAGTGATTGTACGATATTTGATTAGTATTAGCTAAGTTGATGTAATAACTTTCCG  
AATCTATAGATATTTACTCG  
>locus0420  
AAGCGCGGGAACGGAGCGCTTATCTGCGCGCGCCGAGATTGACTTCTTCTATCCATTACGCGCTCAAATGAGTTC  
CTTTGATAACTGTTGTGTGATCGAGTGTCTGAAATGCCGAAGGCATAGAGCGCGGAGGGATGACTGGATTTTTCTTC  
GGAAATTTTCGCGACGCGC  
>locus0421  
TCCGAGTCCGCTGAAGACCTTAATGTTGGCATTCTGCTCTGTAGTAGCCGCTACTGCGAGGCTTCTCAAGTTTGC  
GGTAAACAATCTTGGCACGCACTGCTGCGAGACGGCATCACTGGCTCAGCGCGCAGCACAACACATACATACGCA  
CGACACGACGAGTACGAG  
>locus0422  
TTCACTGGAGGAGGACAAGAGAGCGAGTGGCATGCTTTTACCATAAAGCTGTTTGTATAGGGCTTCGACTATCAC  
AGCCAGCTTTGATAGCAAAATTTGTGCGGCATCGTGTGTTCCGCTGTTCCGCTGCTGATGGTACCAGGCCCCCG  
AGAGCAGAGCATGGAACCT  
>locus0423  
TCATCGGCTGTATACCCAGAAACCTCTCCGCGCTCTCTCGACCTATTGTCGACCACCGCTAGCATAATGCATCT  
TAAACGCGCGCCTCAAAGATCGACGCTCTCTCTCTGAGCTCGCTTCGGAATTCCTCAATATAAATAGATTCGG  
AATGAGTATCCGGTGTCTG  
>locus0424  
AGAGAGAGAGAGAGAGAGAGAGAGAGAGGGGAGGGCAATACAATAAAGAGGGGAGGCGAGTACGCTAATGCTC  
GAATCATTAAGAAAAACATGAAATCTAAGACGCGCTTCGCGGATTAACATGGAAGCGGTATACATGATACGATCTCT  
TAGCTTCTTACTGCTCTCT  
>locus0425  
AGATCGCGCGCGCGCTGCTGCTGCTGCTGCTGCGAGGCGTAGACCGCTTGCGCGGAGCCAGAACGTATGAAA  
ACAAATACGAGGCGCGCTGTTGTTGTCGCGCGCATCTTCTCTCTCTCTCTCTCGCTTCTCTCTCTGCTGCTG  
TGCTGAGAGGTTGACGTA  
>locus0426  
TCAATGGAGTGGCGGCCCTCGCTGCTAGGCTTCGAGATTCTGCTGTTCCCGAGAATTGAAGGATGGGAAATGATGCG  
CAGATTGGCCGATCATCTCAAAACCAACCCACCGCCCCGAATCGCAGCGCCACCACTTCCATCCACCCCTTAAT  
GCATGCTGCTGCTCTCTCT  
>locus0427  
CAATGAGGAAAAAACAATGCCACATGAGAGTGTATCATACTTCTGAGAGTACCGTCCGCGGATTTCTGATTTG  
TTACATGCGAGGCTTTCGCGGATGCGCTTACCTTACGGCTTACATTCGCGCAGGAGCTCCACCTCAACCGGATA  
TTGCGCGGCTCACTGCTC  
>locus0428  
TAGAGAGAGAGAGACTGATGAGGAGAGAAAAGGGCAATACATAAAGAGCGGTTACAAGTGGCCAGCAGATGTC  
GTTGAATGTTTGGCATCACAGCAGACACAATGGGTTGGCGGAGACCCTTCGCGACAGTTCAGGGCGCTCCGCTCCG  
CCACATGCAAAACTTACCCCGAACAGGTACATCCAAGGATACTGCAACCGAGACACAATCCCCAGGCGCTAAAG  
TACACA  
>locus0429  
AGAGAGGAGAGAAAGAGAGAGGAAAGCCCTTTTTTCCGGGATACGATCTGCGCGCGCAGCAAGTGTCTCATGAG  
TTTTCAATGAGATTAGCGCCCATCTGTGCCCGCAACCTCGGTAGTACATCATCGACCTCGAACCAATGCGCGGAG  
CCAGTCAACCTGCTGAGCT  
>locus0430

AAGAAGGAGAGGAGCTCGCGCGGGGCTCGTGATTGTTAAGGGATACCACCACCACCGGGTCTCATGTTATTTATCTT  
TATGGACCTCGGGCAGAGGTAAGTACACTTATTCGTCGGGGGGGGGGGGGGGGGACTTAAGCCGTCGAGGGCGCTGTA  
AGAGATTGTTTGTCTGATTG  
>locus0431  
TGAAGAAGGTGAAGATGGTTGTGTAGTCGTTGATGTGATGAAAGTGGAACTCATCAAACCTCAAGAAGAAGAATTG  
ATAATGATCCATATGAAGAATGGAAGAAGAAGATTAGCTTATGGAGTGAAGTAGACAATAATGAAGTAGAAATTATA  
ATGGAAGAAGATTCAAGGAG  
>locus0432  
TTGCTGCTTTGTTTCATTTTTGTTATTAATACTTCTACCCACTTCTGTCTACACTGTTCTACATTCTTCTGCATGGCGTGG  
TTGGTTGGTAGTGGAAAGGAGAGAAATGCTCTCCCAACAAATGCAAGCGCACTGTGAAGATATTTACAATTTATTTAT  
AACTCTCACGCTATTTTTT  
>locus0433  
GGTTCGCCGCTGAGCAGAGCACTTGGCTGCCGTTAACGTGAATCTGTGTACATGTGTGCATCCTGTCCGCTAAAGT  
GCCTAGCAACGATGACCCACCTCGCCGCAAGGAGGCCATCCTCGCTCCCTCAACATCAAGGCGATGACGTTCCGACG  
ACACAATCGGTGTTCTGAGT  
>locus0434  
TATTTATATATTTTGGGCGAGTGCATCGATGATTTTTTTCAGTTTATCGCCGCCAGTGACAAGCTGTGGTTCATGCTGGA  
GATGATTTGTTCCGTTCCGAGACTTTTACGATACCACCCTTTCGTCCTCGATCTACCTGGATCGGACGTGGATCGGACTGA  
GGTCCCTCCGAGCCCTACGA  
>locus0435  
GTATACAGATGCACACAAACACATACACACAGACGCGCTTCCCCGTCGTTTCGCTAACGTGCGGGGCTAATGCTC  
GTTATCTCGACGTGTCGACTATCTAATGGCTCGGCTAATGGCCGCGCAGCATATTTGCTCAATTTCTCGAAATGCGCG  
CTAACGCGCGAGCTGCGCC  
>locus0436  
GAGGAGAGGACATAAAGCGGAGAAATTTGTCAGCGCGCCCTCAAGCGCGGCGCGCGCTGCGGATATTTCCGAAATTTCC  
ACGCCATTAACCATTTGCAATGGGAGATGCCGCGAGTCGTAACGTGTGATGCATGAAAGGGCGCGCGCAGAGAGAGA  
GAAAGAGACAGTGCACATTT  
>locus0437  
ACGTATTTCTCGCGCGAGCTTACGAGTTGCGAGCCGAAGAAAGCAGTTTAGCTCCTAGCGGCTGTATCTGATTTC  
ATGTTGTTGTTACGTTGCTCAAAATCAAAGCAGGAGCGCTATTTCCGTCGGGCTCTTCCCTCTCCCTCCCGCGATT  
CTCTCTGATACTATATACT  
>locus0438  
GGAGAGAGAGGAGAGAGAGAGAGGACGAAAGGTTGGCGGGCGGAGTCGACCCGCTGCTCATGATTTATCGGGAGTCT  
ATCATAGCCACTCCATCCAGATTTGCGAGATTAATCGAGCGCGAGCTGCACACTGCATCAGCGTACACACTCGGCTACT  
CGAACGCAACTAACCTCGG  
>locus0439  
GGGCGGGCGGACGGAGTATACCACAAATGAGCGCCGAGAGACAAAGCGGTGCTCGCGCAATGCTGATGTTGAAC  
TCGACTGATTTGCGACGATTTTTGGCCTTTGCATGAGCATCGCGAGCGCGCGCTCGCAATGATTTCCGCATACGTTAA  
TCATCGCTATGGGACAGGCGAGCTCCCTGTATCTCTGACGCGGGCGATCTTTCGCGACAGAGGTGCTCAACCGAT  
CGGC  
>locus0440  
CTCCGCTGACGAGCGCCAGCCGCGCTGCTGCTGCGGGGTGCGAGGGGCTCGTTACTATAGCATTAATATTCAC  
GGTTTCAGTTTGAAGTAAAGTGAAGTAAAGTAAAGTAAAGTAAAGTAAAGTAAAGTAAAGTAAAGTAAAGTAAAGTAAAG  
TCTTTTTCTACTCATTTCC  
>locus0441  
GAGTACAATGTTGTATGCTACGTCAAATTTGGAATGCCAATCTTCTGGTCCCGCAGACATTTGGCATTTCGTTACAA  
TTATACAGTTATATAGATTTCTATATAAATACCTAATATGCTTCGTTAATACATACCTAATATGCAATTTGTTAGAA  
TCGGCCGCTGACCTCAA  
>locus0442  
CGGAGTGTAAAAGGGGATGAGAGAGAGAGAGAGATACAGTTTCGCCAGGGCGGCTGATGAGGATTTGATGATA  
GGATCGCTCAACACAGCTGAGCCAAATACACGCTAAATCTCTCGTCTGCGAGCTCGAGATTCGATATGATGATG  
TGCCGTGACAGGCGGCGCT  
>locus0443  
AGAGAGAGAGAGAGAGAGAGAGAGAGAGAGAGAGAGAGAGAGAGAGAGAGAGAGAGAGAGAGAGAGAGAGAGAGAG  
CGCTGAGTTGGTTAGGGTAACTCGCTCGGCAACACGAACTTAACTAACCGTCACTCCCTGTCCTCGCTGCTACTG  
CCGCTCGAGCTCACCCCGT  
>locus0444  
CGCCGCTGCAACACGCTGGAGCATACTCGTTTCTTCTGCTCTGCTTCCCGGAGCGGGCGAGCAAGGAGAAAGAACT  
TAAATGAATAATGATCGTATATTTAATTTCTATATGATGATACACATTTACAAGCGCGCTCCCGGAGACGAGAGC  
CGCCACGGCGGGCGGCGG  
>locus0445  
AGAGAGAGAGAGAGAGATGCGGGGGTGGCTGACATGAGCAGCGGACAGCAGCAACACACAGCCCTTTGCTATGTC  
TTAGGGCTTACATATAATTTCCGTTTTCGCGAAAGGATTTGCTGGCGCAAGTGTGCTGCGATTTTAAATATGCTCA  
CGTACCGCACTAAGCTCAA  
>locus0446  
TTCACCTCTCTCTCTCTCTCTCTCTCTCTCTCTCTCTCTCTCTCTCTCTCTCTCTCTCTCTCTCTCTCTCTCTCTCT  
GCAATGACAGATACTGTCAAATTTATCGGACTCGTTTTCTGGGGCGCGTCAAATGACTGAACGATTAAGCGA  
GCCGAGAAATGACTGGAAT  
>locus0447  
GACCACAAATAGAGTGTCACTCCGTCGAAATTAATGCGCACCTCCCTCCCTCTGCCAGGAGCACTACGATCCGCC  
ACCCACTGCAATTAATTCACACTGTACTGTACAGTCCCGGTTATGGTGGAGCACTCTACTGTGCTGCTGCTGCTGCT  
ATACTTAATATTTATTTAT  
>locus0448  
CCCCCTTCCACCGCATCCTCTCTCTCTCTCTCTCTCTCTCTCTCTCTCTCTCTCTCTCTCTCTCTCTCTCTCTCTCT  
AAAATATCGTTATGGGTAGCGGTGATATCTCTGCGCTCGGATTTCTATCTCTCTCTCTCTCTCTCTCTCTCTCTCTCT  
TATACATTTCTGTCGAGAG  
>locus0449  
CTGTGACGCTACTCTTCTCTCTCTCTCTCTCTCTCTCTCTCTCTCTCTCTCTCTCTCTCTCTCTCTCTCTCTCTCTCT  
ACAAATTAACCTGACAGATCATCCGTTCCAGCTCTACGCACTGACACCTGCCCGCGCTCTCTATCCGAAATGAAT  
CTTGCCGAGGCTCACGCGAG  
>locus0450  
CTCTCTCTCTCTCTCTCTCTCTCTCTCTCTCTCTCTCTCTCTCTCTCTCTCTCTCTCTCTCTCTCTCTCTCTCTCT  
TAAAAGTAAAGTTTGTAAATGAGTGGGAGTTAATATGAAGCTACCGGTTGGAGTAATGGAGCGAACGCAACAA  
AGGCTCGTACCTGACGTTCTCTCTCTCTCTCTCTCTCTCTCTCTCTCTCTCTCTCTCTCTCTCTCTCTCTCTCTCTCT  
C  
>locus0451  
TCCCACGAGAGGTAGAGAGCGCTATATATTCATCGGAGGATGGCGGGTACTGATACTGGTGCACCAACAGTATTGT  
TTCCGATGATAAGCGGCTTAACGGAGCTCGTTGAGCTATTTCTCTCTCTCTCTCTCTCTCTCTCTCTCTCTCTCTCTCT  
CAGTCTCTCCCTTTTGA  
>locus0452  
CACACACACACACACACCCCACTTCTTTCCAGCTATATCATAACGCTGCTGCGGGGTGACCTTTCAATTTTTCACAC  
CCGGTATTTGATTCACCTTTGTAATAAACCCCACTGCGGGGGTTCCTCTCAACCCCTCACGCTACACGAC  
ACCTACATGCTATACGAC  
>locus0453  
CTGTGCTGCGGCTGCTGCTGCGGGCACTGGCTACTCGTTCTCGGGGAGATTTAAAAAATAGAATGCTACTGTCAAT  
TGTCCATAATTTAAATAAATGAATAAATGGACAAAGTGGCAATTAGAGTAGTTGCTGGTTGCTGCTTTAACGTATT  
ATTCTTTCTGCTGCTC  
>locus0454  
CGCTCACTCTGCGCACGCGGGCACAATCCCTTACGCGGAGAAATGAAATTTATCCCGGATTTTTCGCGTGTGTTTACAT  
TATTTTCGCTTTGAATTAATGAGCATATGCGCTCTCTTTCGCGGTTATGGCTGCGCGCGCGCGGAGGACGACGAC  
AGAAAAGTAAACACAGCGGA  
>locus0455  
CCTTGTGAGTCTGCGGCTCTGCTCCGCTCCGCTCTCTTCTACTGCCCTCCGCTCCGAAAACGAAAGTCAAG



CTTGTCAAATTAATCAGGGATGACCAATCCATCAGGAGGCAATCCTAGTGTACGCACACACACACACACAGCTCCGCT  
CTCGAGATCGCGAGAGTAGA  
>locus0456  
CTAAACGAGAATATTTGTTTTTACTGCTGATCATGTTGGCAGTATGGGTGCACGTCGCGAGTTTCTCTGATAAACAGT  
ATCGCTACAGGCACAACCTGCTCATGTTGTAAGTAGAATAGAGTTTTTTTTTACTCCCTTAGCACTTTATTT  
TTCTTTTTAATATTCTCAGA  
>locus0457  
CAGTCTATAGCAGTGGCAGCGCTCGGGCTTACACCGCTTTCACCGCTGCGGATCACTGTCGAGCCTCCGTGATTA  
AAACCGGAATAAGTTGTTTCAATGTCCACTATATAAAACGGGAGCCAAATAGTTGTTAAAGCGCGGCTCTCTGTCTTC  
TTCTTTTGGCCAACTCACTCT  
>locus0458  
CGCCAAAGACCGCGCTCCAGTGCACCATCTGCGGCAAGGGCTTCGCCACCGAGTCCAGCCTGAGGACCCACAGTCCGA  
AGTCACTCATGTATGTACCAAAATCCGACGTCATGATTTTTTATTTTTAACTCATCTAAGCTCTGTGTGTACATATAC  
ATATATGCGACGACGACGTC  
>locus0459  
GAACGAGCTGCGAATAGGGCTTGGCCCCACTCGAGCACAGCTCGCCCTCGTCTCTTTGCAACAGTCATTTGTTAT  
CGGCCATTTATTTTAAATGATTTCCATGCACTGCGTGAACGCTCCGCCGCACACGGCTCTGCGCCCGGTGTGCGTGC  
GTGTGTGGCGCAATGACCT  
>locus0460  
TACGAGAAATTCGAGACTAATTTCTCCGGCGCTTTGCGAGCTAGCTCCGCTCCGAGGCAAGCGGCTCGTTAATT  
TCTGACGTTAATGCTAAACCTGAAGTTTCTAGAAATTTCTGCCAACCTCGGCTCTCTAATCCATATCCCGGCTC  
TGCTGCTGCTGCTGCTGCT  
>locus0461  
GAGATCAACGAAGACGAAGAAGAAGAGAGAGCGAAGCGCGCAAGGACTAAAGCCATAAGTGGAGGTTTAGAGGGAT  
TTCATTAATCATATGGATTGGGATAATGTATGTTATTGAGCCGAAGCGTTCAAATCGCGCTCTATAAGTGTAAATAAG  
TCCAAATTTAGGGCCCGGTACAGAGTATAAGAGAGACCGAGAGAGATGTGCACTGATTTCCACCTCGCGCTCATCGCA  
G  
>locus0462  
TATACGACCGCGCAACGCTCGTTAATGCGAACGAGTGCAAAATGAGGCCCGCGCTTCCACTGACTGATGACGCTATT  
ACTGTCAGGCTTAATGAAAATTTCCGAAAAGTTACCGCGGCTGCGGCTGCGGCGCTCCTTCTGCTTGCCTCTCTCG  
GTCTTAGTCTTTAGTCTCT  
>locus0463  
GAGCAGATCGCGCAGCGCGCGCTCGTGGTTCAGCGGGCGGGGAGGACAGCGCGCGGCGAGAAATCCACGATG  
TTAATTTTAACTTAATTAAGGCTTAATGAGAGAAAACATATAGTCCGCGCGCGGGGCGCGAGCGGCTGGCGACAGA  
CTGCTCTCTTATTTCTCGG  
>locus0464  
GTGCGGAGAGAGGAGAGATAAAATGAATGAGAGAAAAGATACGCGCGGGAGAGATGGCAACCTAATGGCGGAGCAA  
TTAACAACAAACACCGCTCATTAATCGCGGAGAGTCTGCTTCTCTCCCTATCTGCGCTCTCTCTCACACACAC  
ACACAACCCCAACGTACAA  
>locus0465  
CGCCGAGCGGAAGGCTCGCTCGTGGAAAGTAAAGTGTATAACGGCTTTAATAGCGCGGAGACTACTACGCAATAAC  
GACTGACGAGCAGCAGAAATTAAGTTGCGCCCGTAACTCGATCTAATTTGCTCCCTTCCCTCTCCCGCTCTCT  
CTCTCACTTATACATAGAT  
>locus0466  
CGTCGCGGCGGCGCGCGGCTCCCTCGAGCTACTGCTATATACTACTGCGCGGCGGCTTCCCTCAATCAATTG  
AATCTATTCAGCGTGCAGTTGATATCATTGAGTCAACCAATTAATCTCATTTGCGTTTCTCTCGCTTATTGTTCA  
CCCTTCGCGCGCGCGCGG  
>locus0467  
CTCAGCAGACTACTTTCTCAGTTGCGAGTGCCTAAGGGACAGTCTTCTCGTGGAGCTCGGGCTTCGACA  
ACTTCAGGGATTCGTCACTGGGCTTCTGCTGCTGGGCATCGCGGCAATTCGCTCTTATTGGAGAACTTTATAAAG  
TAAGTTTCTCTCTCTCTCT  
>locus0468  
CCCAGGCCCTCGCGGCCCTTTGTTTCCCTGCGCTGCGTGGTGGAGTCCAGCCGAGACTCTCGCGCAAAATAACGC  
GACGCAAAAGGATGATACACTCCGGGCGCAGGAGTCCAGGTAACAATCCCTACAGATCTCTCTGCTCCATCTCC  
GATCAGTGGCTGCTGCTTCT  
>locus0469  
TAGACGGAAGGCGCGCTCTCGTCTGCTCCAAAAGGGCGACGAGCGGAGCGCCGCTAGGCTACTAATTAATTAAGT  
TGATTAATCAGAAAAGTTGCTAATAGAAAATTTGCGCTGAAAATTAATAAGGAGGAGTGTGACGCCGCGCGGAG  
GCGAGGAGCGCGCTCCCA  
>locus0470  
ATAATTAACGCGAGCGCAGCAGCAGCACAACGTTGGCTCTATATAACGCGCGCAGAGCGCTGACGCCGCGCGGAG  
TTAATCAATGCTATCGGGCAATTTCCGATGGCGGCTTCTCACCTCTCCCGAAGCTTATCGGGCGGCGCGGAGC  
AGCTCTTAGCAGGAAATTC  
>locus0471  
CAGAGGAGAGAAAAGAGAGGAGGAGGGTGAACCGTGTGAGCGCTGCAAGCTGGTGCAGACTAGCTTCGGGGTCA  
TATCGAAACAATGGTTACGCTGTGTTGCGCGGCTATTCACCGGAATTTATTGTTTATTATCTCGGGCGGCTCGGT  
CGCGCTCCGAGAGCGGAGC  
>locus0472  
CAAACAAAGAGAGTGTACAGGCTTTTTGCTTTGGATTCTGAGAATGAAGCGGCTTACCTGGTGGACATCATCTGC  
GAGTGTGGGGCGGGGTGCTGGGGTGTGGGAAGATGGCTGTGATGAGGGGTGTGGGGCGGAGATGGTGCATTTG  
CGAGTTGTTCTGCAACAAGCAACGCAAAACCGCGGACATGTAGGCAACACTGCGATTCAACAGGCAATAAACAATAA  
A  
>locus0473  
AGGGCTCAGTACGTGCATATCTCCTCTCTCTCTCTCGCTCGCTCGCTCAGCAGACACCGGAGAGGAGCGTA  
ACCTTTCTTGACCCGATCTGAACGGCTCTGCGCTGCGGCTCAACCGTGGGAACACTACTCGCGGCGACTCATCCC  
CCTCTCTATCCCCCTCT  
>locus0474  
CGCGGACATTTGTTCCCGGATGCGCGCGCGCGCGCGGCTTTTTGCGGCTTAATCCAACTCTGTAATAAATA  
GCGGCGGATCAGGTTGGCATTTGCTCCTCCGTAATTTATCTCTCTCCGCTACTTTCTTTCAGCGGCGCAGCAGC  
TTGAGTGTGCTCTGCTCT  
>locus0475  
TATTTGAATTCGTATAACAAAACATAGACATATGTACCTGGCAATGATGCTTGTGAGTGTGTTGCTCTCGTGT  
TCTGTTACACTATCTCTGCAAAAAGGATATCATGTGAACAGAAATATAGTTAAAAAAAATATGAGAAAGTAGGGT  
TGTGAATTTTTCTACAGT  
>locus0476  
TGAGCCGCGCGCCCGGAGCCGCCACCCCGCTGAGCCACCCCGCTGACTGCGGTTCTTTTTCTTCTCCAA  
GTTAACTTGGCGTAGAGCGGCTCACCGGTTTCGGCTGCTGCAACACACACAAGTCAACGCGCTGATTTAGTTAGTCT  
CTCGGAGCTTTGTTGTTAC  
>locus0477  
TAAAGATTTGGTGTCTCTCCCTCGCGGACCGAACGAAGCCCGCTCCGAGTGAAGCGGAGGCTGAGGACAAAAT  
CAATATGAACGTTAGCCATTTCTTTAATCTGCCCCGCGCACCGAGTACGAGAGACTCGGCTCGGCTCACTCTG  
CCTCTCCCCCCCCCTCT  
>locus0478  
CGTCATTACAACAATATCATATAATTTGGTAGTAATAATAGTAGTTTTGGAATATATAACGAACCCGAAACTGAGA  
GACTCACAAGCAGGAAAGAGGAGGTTTCTCTCTTTTAGAGTTGACTGATCGACGTTAACTATGGCATCTGGCAGT  
CTGCAATGCAAAACATAT  
>locus0479  
TCCACCCCTCAGCTAGCAGCAGCAGCCTCTCGTGTGAGCTGTACTCGTCCGATTTGGATATATACTTAATGAA  
GCGTAAATAATTGAGTAATGTGCTCCAGGCGTTCGATCGCGCGCATCTTATTGGTCAAGTAATCTATTCCGAGCG  
ATTAGCGAGCAGCGCTCT  
>locus0480  
GCGAGTGAAGGAGGAGGCGGAGCGCAACCGCGCGCTTCGACAGTTCATATACGTTTCAATACGAATGCATACG  
AGCAGTTAGATTGACGTTAGTGCCTTGAATAAATAATTTGTAATGCTGGCTACTTCTGTGCGAGCTGCGCGCGCT

CGCGCACTCGGCATAATATC  
>locus0481  
CCGAGCTTGGGGTTCTTCTCGCAGAACGGCGGCGAGGGCTCGAGGTAGACGAGGTCCTTGACGCCCGGGGGCTTGTGCTC  
CGGTTGTACGGCTTCAGCTGGAAGTTGTAGCGGTCCGCGGGGAGGAGCCCTCGCGGTGCGGTGCACCGAGTTGCTCG  
CCGAGTGTCTGTATGCGG  
>locus0482  
GGATGCCCTCCGATTGGCCGCGCTCTTTTCGCTCTGAAAGTCTGGATATCAAGATCGTTGATAAACTATCGTA  
TCGTTTAAATACGCCTGAAAGGTGAGGCGATGCATCAGTCGAGATACGCGGGCGGTGGCAGGAGCGACGCTCGCTG  
TATCGAAGAAAGACGAGGA  
>locus0483  
GTTAAGTAATGGACTCTACGAAGCAGATGGTATGAGAAAGGACAGAAGCGAGTAAAAAAGATTTAAACAGCCTGGTGC  
GAAACTGACCGTAGTGGGACATGTAACGTAGTTTACACATGCTATTGAGTAGGAACACATACGGGTCCATATACTCCA  
GGTAAAAATTATGAATAGGCTCCTGTAACCAACAGCTATCGGCGCCCATATTTGTTGTTTACATGCAATCAACCA  
>locus0484  
GAAAGCTTTTTCGCGGGAGGTGGGGGACGGATGCGCGTACAGAGGAGGAGGAGTGGGGCAACGCGCGCTCTCTCGTC  
ACTGTCTATCCGAGCAGACAGCGTGGAGCTCGTCTCGGGCGGCAAGTGAGTGCCTAATAGGCAATAAATAAGTCC  
AGGCCGCTTACCGGCTC  
>locus0485  
CGGCACAGGGTCCCGGTGTAATAAATATACCGTAGCGAGGCGGGCTCCTGAGCTTCGGGTCCCTCTCTCTTCCA  
CGCTCAATAAAACAGCTATATTTCTAATTAGCCGAGGCGCTCTATCTCTCTATCTCTATCTCTATCTCCGCGCGCGT  
TCGAGCGCAGCAGCTGGCT  
>locus0486  
AGAGGTATTATGATTGTCTATAGTTTAAACGATGGCTTACTTTAGGTAGCCTATCATTGTCTATTAAACAGACTTAATTA  
ATGTTATGCAAAATGAATTAATAAAGTGAAGCGAAGCGTGTAAACGAATAGAAGACTCTTATTACTCTCCCTCCACTC  
TCGTTCCCATCTTTGTTGCGA  
>locus0487  
CGAGAATCTCTTTTTTCGTTTTCGTTTTTATGTCCTCTCGGACGAAGATTTCGGCACGCTCGGGCATAGCTCAAAAATC  
CGACTTGATTAATTTTGTATCAATTACTTCGAGCTAAATAACATGACGACGCTGTGGCGCATGAGGGGTGAGAGT  
ACGTCGTCGACTTTTCAAC  
>locus0488  
ACTCTGCTCCGCTCGGCACATCGATAGCTGCAGCAGCGGCGAGCAGCAGCCGAGGGGAGGAGAGATATCGTTAGC  
ATGCTTGTCTAATACGGACTCGATAATAATACCTGATTGATAGGACGAACCTATACCTCGAGCGAGAGAGTATCGGC  
TCGTCCTCTTCACTGCTCT  
>locus0489  
CCCCGACCGCCCGCTGCCGAGCCGAGGAGAGAGGGGGGGGGGGCGAGAGAGCGCAGGAGCGGAATATAATTGTA  
TCTAAATTATAATATACAATAATAACAGCTATAACGGCAGTCTGACCCAGTACAGCGGCTGGAAAGTTTTTCATTC  
GCTCGCTTGCCAAGGCTGCC  
>locus0490  
AGTTTTCAGCATTTTCAGGATTGTTGTTGTTGACAGAAGTACTTATGTTAGTAAGTAAGATTAGGGTTGGGGCTAGGA  
CAGGTCGTCGCGCCCGCGGATACGACAGTCACTGAGCCAGTACTTCCCGCATCATATCTACGGGCAACAACA  
ACAAGTATGGTTAGTTGTTG  
>locus0491  
GAGCCACACATACATACAGCTATATAGAAAGCGGAGGACGAGCTGGCGTGCAGCCGCGCAGTGTCTATCTTAG  
CCACCACAAGCAGTATAACATTTTCCCTCCTGGAATAGAAGCTAGCAACCTCCCGCGCGGCGCAGCAGGTCGATA  
TCCGGATAACGTCGACGGTC  
>locus0492  
GAAAGAGAGGGGTGGGAGGAGAACGGTTTCAGCGGCTACCGGCTCCGCTCGCTCTCTGCTACTGCAATATGAAAA  
TAATGACGCGCCCTGAAAGGAATGCATAATGAGTCCCTCTCGCGCTGACACCTACGCGCTCTGCTAGCTCTCTCT  
CTCTCTCTCTCTAATAGC  
>locus0493  
CGGCACAAAGGGGGCGGACCGTCCGAAGTAGCGGTGCGAGGAGGTTGAATCGAGACTGCAGAAGGGGTTGGCGATTG  
GCATTTAATTAGCGCCGATGACCGCCGACCGCCGCTCCGGATCAATACGGCGGCCCCGAGGCAAGTGTGAGGT  
GGCAGCGCACACAGCAGCGG  
>locus0494  
CTGCTGCTCGCGCGGCGGAGCCGAGTAAATACAGGCTCGGCGCGCGGGCTATTTTGGCTGTTTTGTTGTTTT  
TCAACGCGCCGAAAGGAAATGAGCGAGCAACCGCTCACGCCAGCCGAACTGCTAATTTCTATCATTTTTATGGCT  
ATTAATTTCTTCTCTACCGGACGAGCTCCTTCTTCTGCTGCTCTGCTCTCACCTTCCCGCAGCTCC  
>locus0495  
GAGAGAAAGGAGAGAGAGAGAGAGAGAGAGAGGGGCGCAGGAGGGACGAGCTGCCGATGCGCTCGCTACTCGTTTATCC  
AATCGATCGAGCTGAAAATTTCCAACCTTGATTAAGATCGCAAGGGCAGTGTGAGTTTTCAATCAAAAAGAACCAGCGC  
TACCTCCGCCCTTCTCAC  
>locus0496  
GCAGTAGTACTCGATAGAGAAATGAGAGCGAGAGCTGCGGCGAGGAGAGGCAAGGCAACGCCACTAATTAGTGCCAAAGAC  
GTAATTAAGTAATTTTAAATTAAGTACTGCGGTTTACGCGCTCTGACGCGAGGGGAGGAGGTACACGTGTATATGTA  
TACAGTACGGGCGGCTTCG  
>locus0497  
ATACAGCGATTACGTTAAACGGGACGGTATATCATTTATCCCGTTCGCGCGAGATCGCGAGATTTCCGGCTTCAACGA  
CGGTGCGATCAAGGACACTTGGCTCCTACGCTTTTCTGACCACTCCACTTTAGTCGAATGAAAATCGCACCCACCCTC  
TCCCTCTCTACTCGCGCC  
>locus0498  
CAGCGTTCAGGATGCGCTCGGCGCGCCCTTCATGACGAGCAGTGCAGCGGTCGTTGGGTCGTCGGACTCGTGGAT  
CGAGACTGCTACTTGTGTCGAGTTGAAGGACCTCGCAGACCTTCTTGTGCGCTTCGATGCGCATGACGTGCG  
CGAGGGCGAGCTCCATGCAC  
>locus0499  
GCAAGCTCTCTCTCTCATCTCCAGATGTGATCGTCTGATTTCTCTCATCGTCGTTAGCGCCCTCAGAAAA  
CTGAGATACCACAGCTGTGTTCAACCGCTTCTTTACCTACCGAGTGAACGAGAGTGGCTCCCTGTTCTCCGAGCAGA  
GTCTCTCTCCGAGATTAG  
>locus0500  
GTGCAGAGCTAGGTGTACGGCGAGGAGGGCGAGACAGAGAGCGCGCAAGGGGTGTAACACTGCAAGGGCAAGACAGC  
TCGTTAAATATCAGGATGGCGCGCGCTCGGCAATGCCGTCAAAGCATTTGAGCGTGTGTTAGCGCGAGAGCAA  
AGGTTGCCTAATGAGGGA  
>locus0501  
CTCTTCTCTCTACCCTTATTTGGATCCGCGAGCGCGGCCATCCCTTTGGCGGGGTCGCGCATCAATCAAGCTTG  
TCAATTTGTAATGGCGATTCTCTGTGCCATCTCGCGGGGCGAGCGGCTCTATCTCCCTCTCTCCCGAGCTCTCCCTG  
CGTAGAGGGTACTGTTTC  
>locus0502  
GGCAAGAGAGCGAATGAGAAGTCTGGGGCCGAGAGCTGCGAGTCGATATCTAATTAGCGGGGCTGATCGGTAATTA  
CTACGATTAATCAATCCGTTTCCATTTGTGCGCCGAGCGAGAGCGAATGAGAGCACAGTTTCAAGCTCGGAGCGGGAGC  
GAGAGAGCGCGCAGACTCC  
>locus0503  
TTCCATTTCTCTTTTTCTCTCGCGCGCACACGCGCACAGTACACGCTGCACGCGGCTAATATATACAGCG  
TTGAATATATTAATGCGCGGAGAGATATGTAAGCGTACACCGGACTAGGAGAGTGAATATGAGTCTCTTTGCTCACTC  
GCTCTTCCCGCTTTCTCGC  
>locus0504  
GGGAAAGCAAGGGGGAAAGCAGCCTAGAGAAGATAAGTAGAGCGAGTGGGGCTCGGGAAGGAGAGCAGGTGCAAACT  
GGCTGTACGGAAGTCTGTTACAGCTCGAGGACAAAGCCTCCCTGGGAGTCTGTGTGTGTCGCGCGGGCGCGGAG  
AGCTGAGATAGATATAGAT  
>locus0505  
TAAATAAATTAACAAGATTATGCCACTGTCAAGTGTATTGATGCGAGTGTGTTATTCTGTTTTTTCTATCAGTGGT  
GTAGGCCATATTCGCCAGTTGTATCCCCAGATTTTACCTGATCGGGACGCGAAACAGTATGGCGGCACTTTGAAGA  
ACGAGCGAGTTCAGAGTGAACACAAAAGCCAAATAGCTATCCAGAGTTTATATACATATGATCTCTGTCA  
>locus0506  
CGTTAGTCGCTGTGATTGCGAGTCGGTCGGCGGGCTTTGAGTGTGCGGTTTTAACAGCCTTCGTTGCATAAATTA

TCCAGAAGCCCGATATCGTTTGATTCCGCCCGCTGCGGCCGAGACTGTGTATGTATGCATGCTTTCCTACTCGCTCTCTC  
CCTCATCTCCGCTTCTCTCG  
>locus0507  
TGTAGGTGCGGCCGCGAGTGTGAGCGCAGCGCGGAGAGCGGAGCGGAGCCGATAGGGATTACGAGCGGTTTCGGGCAA  
TCGCGAATAGAGATTAGCCGCGTAATTAACATATGGATCTGGTCCGAGCAGCGAGTTCCGAGCGGGTGTATGTACAGG  
TGCATACGTGCGCGCGCGG  
>locus0508  
TCTCTTCCCACACACACACATATAACGAGAAGTCGAGCCCCCTCGCGTCTCTCGTATTGCGGCTACCAAACCTCG  
GCAATATTTAAATGGGATTTCGCTTCGGGAATTAATTGCTCGCGCAAACACGACTACACCGCTCCGCGCACAGGAGCGCAG  
TGGCTGTATGTACATATATA  
>locus0509  
AGGGGGCCGATCCCACTCTCTCTCTCTCTCTCTCTCTCTCTCTCTCTCTCTCTCTCTCTCTCTCTCTCTCTCTCTCT  
ATGACACACATAACTGCGCGGATGATATATCTGGCGGGCTGTAGCGGCTCCGCGCGCGAGAGCCTCTCTCTCTGAC  
ACCCCTCTCTCACCGCGT  
>locus0510  
TTTCGCGCTGTGCATAGGGAGTCCGGAGTGTATAGCTCCGCTGTGCAAGAGAGCGCGAGTTACGGTTCGAGGCATACA  
GGTGGTCCATAACATAACAGTCACTGCGTTTATCCGCTAGTAACCGGCGCGCGAGCGCGGTTGCGCTCGGCTCTAT  
GATTTAATACCCCATGCCCT  
>locus0511  
TCGGAGTCTGTGTGCGTGCGCCGGACAGGGATGGGGTTCGCTACGAGAGAGCGAGCGCGCGAGGCAGATAAGAGA  
ATTGCACTGTCAAGCGGAATGATATATTGACCAACATTTCCATACAGCCCGCTACGGCGCTAGCTCTTTGGCGCAT  
CACTCGCGGGGCGGCTTCT  
>locus0512  
CAGCGAGAGAAATAGTGCCTATACGCGAGCGCACACACACACACACATCGTGCGCTCTCGGCAATTCCGTCTGTCT  
TGTAACGTGCGGGCTGCTCATTTACAATTCGCCATTCCTCGCGCGGAAACCTTCTCTCCGCTCGCTCGCTCTCTCG  
TTGGCGCAGCGCGCTCCC  
>locus0513  
TACAAACAGCGCGAGCGGAAAGTGGCGCGTGCATTACATTTCAAGTTACATCGCGCGCAGAGCTCATCGGATGT  
GTTGACGGGAAATACGAGCATAAACAACCGAGACTAGCCCGCCAGCGGCTGCTGCTGCACTGGTTATACTCTGCTT  
CGTAAATCCAACCTCTCT  
>locus0514  
CTCTCTCTCTCCATCGAAAGAGCGCGCGCACAGCGCGGAGCGAAAACAGGAGAGGCTCCCGGATAAAACAATGA  
ATACATGAAATGAAATTTCCATGAGAATCCAGGCGCGGTAGTCATGAGACTTCTACCTATATATACATATACACAT  
CCGTGCGCGAGTGGCGT  
>locus0515  
ACAGCAGCGCGCGCGAGCGCGCTGGTTCGCGAGGGGAGACGGAAGTACCTCAGGGCAACGGTTATCAAATTTGC  
GCGTGCCATATAATTTAAAGCGGCTTTCTCTCGCTCTTCTCTCTCTCTCTCTCTCTCTCTCTCTCTCTCTCTCTCT  
AGGGTGGGAGACAGGCCCA  
>locus0516  
AGCCTAGGCTAGACGCGAGAGGGGGTCTGTAAAGATACATCCGCGTAGTCCAGCTTTGCGAGTTGCGCGAATGTATG  
CAAATAGAAATGTAATCTGGTGTGCGCGCGGCTACCAATAATGTCAATCAAACGCACTGGTGGCGGAAAGCCAAACAT  
GGGAATTTGCGCGGCTCTCTCTCTCTCTCTCTCTCTCTCTCTCTCTCTCTCTCTCTCTCTCTCTCTCTCTCTCTCT  
TGTATATCAATGGGGATCTGCATATGGATGCAAGCGGAGTGGCGGACTGCAATGACACGCGGCTTTGACGAGCAGAT  
CTGCACGCGCTCTCCATA  
>locus0517  
GGGGTGGTGGAAAGAGAGCGAAGCGCTCGCTCGCTCGCGCGCGGAGCGGGCGGAGCAGCAGTCCATCAGCGTCCCT  
CCACCTCGCGCTTTCCGCACTCTCAATTTTCTCCGCTTCGCGGCTCCATCATTCGCGCTACATCCGCGCTTCTTCT  
CCCTCCCGCTCCCGCTTCGCGCAACCCACCCCTCTCGCTTGTGCAACCGCCAGCCACCCCGCGCTCCCGGGCT  
>locus0518  
ACTCTCGCTCTCTCTCTCTCTCTCTCTCTCTCTCTCTCTCTCTCTCTCTCTCTCTCTCTCTCTCTCTCTCTCTCT  
AGTTCTGTAACACTACGAGATTTGCTAGTCTCGCGCGCGCGCGCTAAACGGTTCGCGTGCAGCGCTCTCCCGG  
CTGTCATGTCTGCACTCT  
>locus0519  
TCTCGTCACTCGTTTTCGCTCGCAGCTACTGGTGTGTTAATAGTTAAAGTTACTGGTGGGACTAAATACAC  
CTCGGAGCTACTCAAAGGAACAATACTGGTGTGCAAGCGCAGAGCGCGCGCGCGCGCCACCTAGGGAGGAG  
GTGGAGGCTGCTGCCCTG  
>locus0520  
TCAAAGGGCGCGCTCCGAGTGGAGTGGCAGGCTGACTCTCCCTTTTGGCGGGGGCGAGAGCGGGTGGAGGCGACA  
ACGAGCAAAATCTGATTTTCGCTCCACTTCCGCTACTCGTATCAGCAGTGCAGTAGTGTGTTAGTGTGCTGCTGCTG  
CGTTGCCGCTGCTGCTACGA  
>locus0521  
CGAGTCAGGGCCCGGAGTTGGCTGAGTGTGGGACTGACCACTGTTTTAAGAAGAAGTTGAGTAGAAGGAGGGCG  
ATAGGCTTAGTACGAGATTAACATAAGTGGTTCTTCTGAGCGAGGAGGCGTGGAGGCGGTTGGGTTCTGGGGC  
ACCGCGCGCGCGGCTTAGC  
>locus0522  
CGCTTAGTATATAGGCGCGGGGGTGGCTCCGCTACGTACGCTATACGCGCTCTGGATGTGTGCCGCGCATCGAT  
CCGATACATCAGGGGCAATTAACATCCCTGCGCTGCGCTGCTGCTGCTCTCTCTCTCTCTCTCTCTCTCTCTCT  
GCAGTCGCGGACTGTATGT  
>locus0523  
TAAGAGAGGGAGAGAGAGAGAGAGAGGCGTTACATTAAGTGTGCTGCGTGAATTTACTGCGCGCCAGTATGATTCA  
GCGGGAAATTTGACGAAGAATAATGATATTGATATCGTGTGTAACCTATGATATGTGCGCCAGGCAATAAATCAG  
GGCCGATTTGAGCGCG  
>locus0524  
ATAGAGAGAGCGGAGAGAGAGAGGAGGGATCAGTCTGCTGAGATGTTGGCAGCCAGGTTGACGCATGGATTCC  
ATTCTGGAGCTCGTGTTCGCTCGGTTAGCCCGTGTCACTCCAGCAAAACCCATTAACCGGCTCTCTCCACCTC  
CTCTGCTCTGTACACGAG  
>locus0525  
CTCTCTCTCTCTCTCTCTCTCTCTCTCTCTCTCTCTCTCTCTCTCTCTCTCTCTCTCTCTCTCTCTCTCTCTCT  
AGATGGCTCCACCTCGGAGAGGATTATTATTGGTAAATACGAGTGCAGAGGCTCCGCTTGCTCATGGCTGCTGACGG  
GATGATTTATTGGCTTTCT  
>locus0526  
ACCCGAAATCTTCTCTCGCTCTGCTCTTGGCGGTGAGAGGGAGAGAAACCGCCATCCGCTTCTCATCGCGCGACA  
GCGCGAGCGGGCGGTTTGGCTCGAATGCTACCAAGGAGTTTCTCTCTCTCTCTCTCTCTCTCTCTCTCTCTCTCT  
CGAGCTCTCTCTCTGCGC  
>locus0527  
CAGCGCGCGTGGTGGCCCTAGGTGGGACTATCGGCCGTAACCATCCGCGCGCGCGCGGCAACATTAACCTACGTA  
TTGCCATCCGACAAGTTGCTTTGGCCCGGAGAGAGAGCGCTACCCGTTGCTCAGCAGAGGAGTACGCTGCGCGTG  
CGAGGGCCAGTCTGCTCT  
>locus0528  
TATCTCGCGGATAACCGAAGCTATTAAAGGGGCGAGCGGAGGATCAGCATCTCGGATAAAGATTCGCTGCGCATGT  
TCCGTAAGATACCTGTAGAGCAGGCTCTGATATCTACAATTTCAAAGCCCGGATCTACAGGGTATGATCAAGAATG  
TGCCTATTTTGGCAAAACCGCTGCTCTCTCGACCCCTCGCACCATCAGCATCAGCGAGCGCTCCGTGTC  
>locus0529  
CGGCCGTCGCGGAGCGGAGAATAAAGCGCGGAGTGGCGGTTACAATGGAGTTGGCAGCGATTCTGGTTCATAGAAT  
CATGGCTGCTATTCAATGAGTTCGAAAATGGCCCTCTGCTCTTACGGATATCTTGCAGTCTAGTTCTATAGCTCT  
TGCCTGCGGCACTCTCTCT  
>locus0530  
CGCGTGTGTGTAGTTAGTTATACGAGTAGCGAGAGAAAGACTAGGCGTCCGCGCGCACACCGGTTTCTCTCTCTCT  
TTATATACCCTTGACGCTCGTAAACATTACCCTGACCGAGAGAGAGAGAGAGAGGTTAGTCTCGGAGCTGG  
GAAAAGAAATAGGAGGCTT  
>locus0531  
CCCGACCGAAGCGGAGAGAGAGAGAAAACGAGAGCGGGCAACCGAGATATATAGTTGGAGAAAATAGCGGCAAT  
AAAGCATATGTAATAATTTCTGAAATCCCTTTTGGAGCTGATATACGGCCCGCGGCTATCGTGTGCTGCTCAT

GTCGTACTCTTGTCTCCTTC  
>locus0532  
GTGTGTATGTGCAAAGCTGCACAGCTTCCGCGGCGGCGGCGGCGGCGGAGTCTGTAATCAGAATTCGCGAATT  
AGCGTTAACGGGCGGTATTGGCGGTCCATTGGCTAGTGTACGGCTGGGCTGCTCTCAGTGGGATATGAGCCATAG  
ATTCCCATATCTACGCTC  
>locus0533  
CCACCCCGTCTGCTCCTCGTCTGGGGGCATCTCCACCCCTGGAACGCGCCAGTATCATGGCGGAGTTACGGA  
ATCAATAAAGTGGTGTCTATGGCCCTCAACTGCCGCGCTCGGAGAGCTTGCCTAGGCTTGCATCCCTACCCTGTGTG  
GTGTGGTTTCTCTCTCCGTC  
>locus0534  
AAGAAGCAGCGCAGAGCGAGTTGATGAGAAGAGGGGCGAGCAGCAACGCGGGGAGGGTTCCGAAACAGCTCG  
CCGCTATCTCGACTGATCCGATCAAGATTAAATGAACGCCAGCGGTATATACGACCTTTGCTCTTCTCGCTCGCGG  
AGCCGCCACTAGACTCTCT  
>locus0535  
CTCTCCGCTTTTCTGCCATTCGCGCGGAGGCCGAAAGAAAGAGCGAGAGAAGCTCTCGGCTAAGGCTAACTGTATTTT  
GACTTTGTGGCTGAATTCGGTAACCGTAAACAGGCTCTCCGCGACACCCCGGAGTGTATAGACTCAGCTCCTCTCG  
GAGTATAACGGGCTCTGCA  
>locus0536  
CGAGAGCTGCATCGGGATGACTCTCTCTCTCTCTCTCTCGAGGCTGAATCGGTTTAAATATTAATGGGAACTGAT  
GATAAGCAGCGCAACAGCGTCAAGTCTCCGCGAGAGATCTGCTTCTGTTCGCCGCTGAGTCCGGCGATACTAAC  
AGCGTATACCACCTTACT  
>locus0537  
AAGAGAGAGAGAGAGAGAGAGGAGGAGGCGGATTTTCTCGTTAAGTAAAGCGAAGGGGCGCGGAAACTGAA  
AAGCGACGCGGAGATAAACGCTCATCTACGCTCAAGACGATCCAATCCAGTCTCTCAGGACTAATCATATTTCTC  
GAGAGATATGCCGCTGTCG  
>locus0538  
GCTACTACTGCTTGTGAGAGCAGCAGCAGCAGGCGCTGCTTCTGCTCAGGCTCAATGAAACAGCAATCGC  
CAGGAAATTCCTCGAATTCGCGCAATCAACTACCCCAATCTATGCTGTGTACACGCGCTTAAACGGCTAATTTCA  
TCGTGCTTCTTGGCCGCGC  
>locus0539  
ACAATGTTTATATACGTCGCTTCTCTCGCAGCTTCTGCTTCTGACACTCGTGCACAGTTGAAGACTAATGTCAACTA  
CAGCTGTTGAAGGGGACCAATGCGTCAATCGTGCCTATATTTGACCCGTTTCAACAGCTAAGCTTAACTTACGTT  
GTGATCCGTCGAGCTTCTCTCTCTTGGCTCTGCTATCTCTTGTCTGTCGAGTGTGTAACAACGGC  
>locus0540  
CGCCCTCGCCCTGTGGCGCAACTTTGTGACTTCTCTCTCACTCTCTCTAGCGCGCGCGGTTGTTTGTGCTTGTGT  
TGATTTGCAATCACGAGATAGCTTTCACCTACGCGCGGACCAAGATTAAACAGATTTCGAAATCGCTCTCTTT  
CGCCCTTTCCACAGCT  
>locus0541  
TGGAGGGGAGAGTAGCTGTGCGCGAGACTCGCGCATAGGAGGGGCGAAACGCGTAAACAGAGTCAACATGTAAA  
CAGGCCACTCGCGAGACAAACAGTGGGGGCGCGCTCGCGCCACCGTCTGCTGTGTTCTGCTAGCACAGTCCGCG  
GCGCGCTATATGCTCCGCA  
>locus0542  
AGGACGAAAGAGAGAAGCGCGCAGAGAGGAGAAAGAAAGAGCTAGGTTGTTTAAACAGGATTTAAAGCGTACTCG  
GTAACATTCGACGAGAAATCGGTTGTTATGACGAGGTGATTTATATCTCTCTCTCTATCGCGCGCGCGCGC  
GAGTTCACTCTTAGAAGCC  
>locus0543  
GTGGAGCAGAAAAGGAGGTGGAGGCTTTCGCGCGAGACCAGGGAATCAACCGTGAAGGATACCGCTTACTGATGT  
GCGCTTCTGTTTAAACAGTAAAGGCGCGCGCATTTGTCGCGCGAAGTTTCCGATAGCGCGCGCGGCTCACTC  
CCCCACCCCCACCCCTTT  
>locus0544  
TTCAATGAGAGGAGGAGGAGGAGGAGGAGGAGGAGGCGCCCTGTTGTTTTCGCAATTTCTCGTTGCGGATCGGACC  
CTCCACGTTAAATTTGCTGTTGTTTAACTCGCCACCCCTTTTTTCTCGAGACGACTTTTGGGAGAGCCCGCTG  
CATCACAGAACCGTCTCGT  
>locus0545  
CTCTCTCTCTCGGGTGTGAAACGTCGCGCGGCTTGGCAGCGAGTAAATCTCTCTGCTATCCCTAGGCT  
CATCTCAATAAATCAATATACTTGTGTAATCGCAGCCCGCGCGCGCTGCTGTCACCAATACCACCTCTCTCTC  
TCTCTCCGATATAACCGT  
>locus0546  
CGCTCAATCGTTTGTATCCATCAATGACCGCGCGAGTACACACAGCAGTCTCTCGGTTGTCGAGATAAGGCA  
TGGCACAGTTGCTAGATATGAGCAGATATCGGCGCGCGCTCGCGCGCGCGCGGCTGTGTGTGTACCTATAGCG  
CTTTGCGGAACGACTTGCCG  
>locus0547  
GAGAGAGAGAGAGAAAGAAAGATGGGAAGCAAAAGCGATTACTCGAAGAGCTGGAGAGATTTTATTTTACC  
ATTTATTTCCGTTGAGATCGCGCGCTGATCCGTTGCGCTCTCTCTCTCTTTTTCGAGCAGCGGAGGTAACCTC  
CTCGTTCGGGACTGTGCT  
>locus0548  
GGAAGAGATTTGGGATGTGAGTCTATGCTCCTGCGTTCACTGCGGCTTCCATGTGCCAAGTTTAAAAATTCATAA  
GGCAGCGGTAATGCCAAGCGGCAAGTACACAGTATGCTCATCTGCTGCACTACTACTATTACTTCGATGGGG  
AGCGACTAGTTTCGTAAGAA  
>locus0549  
ATTTGCGAGTTGTGATCTTCGGGTTCTCTGGGCTCTTTTCGAGCTGACCCGTTGACAGACCATGAACCGTTTCT  
CGCCGCTTTATGTCTGCTGTCAGCGCTTTCGAGCAGATATGACACTGTTTATTTTATTTTATTTTCTAGG  
ATTTACGGTTGTAATTGCA  
>locus0550  
GCGTCGCGCGCAGCGGCTCGTCTGACGCTATGCTCTGCTCTGCGCTGCGCGCGCGGTTAGCTTCGATCATT  
AAACGTGCGTATATAGCTCATAATTTGCAATTCGCGGCGATAATTTACGTCGTTTATAGTTCAAACGCAACCTAG  
TAGAGGCTTGCGCTCGCCGCTCGCTCGCTCGGCTCCGAGCCTTTAGAACGTGCCATTCGTTCAAG  
>locus0551  
ACGATCGCTCTCTTCTGTTTCAAGACATGGACATCGACAAATCTCTCTGTTTCAACGAGGACTAGATCTCGCCGCT  
CTAGCGCATCTAGCGGCACTGTCAAGTAAAGTCTCTATCTGTACATCATACATTATACGCATCGCCAGACTCGAACCTG  
TGCTCGATAAAGCAAACTT  
>locus0552  
AAAAATGGGCAACAGCCCAAAAGTTAAAGTTATGAGAAATCGGTATACAGCGAACCAGCTGTTACTGTTTGTACA  
TTTTCCAATGATGAAATGGCACTTGTAGCCATGCATAAATTAATGGAAAAATCATTCCAGGATCAAATCCAGTAAGTT  
TTATAAAAAAATAAGAGA  
>locus0553  
ACCTCGCGCTCTCTCTCTCGGGTCTGCGCTCTATTTGTGTTGAGCCTGGCAGTACTCTGCGCTGTCCAGCTGAAACTC  
CATGTATGTGAGGATGCACTCACCAGGAAACTGCAAGCAGAAAAAGAAATGAGGTTAATGATTTTTTTTTTTTTTTCA  
ACTATTTTCGCGGTTGAG  
>locus0554  
AGGTGGATTTTGAAGCCGAGCTAAGCTACGCGAGCGTACGCGCGCGCGCGCGCGCGCGGTTGACATTTATATTCG  
TTATGAACGGGTTTACGAGCGCAAACTATAGTCTGTTTATTTTCGAAACAGCAGCGCGCTTCTGTTATTCAGTT  
TAATGGCGCGGATTTGA  
>locus0555  
AGATGTGAAGAGATGAAGTGAACAGCAGCGCGCAAAACTTACTGTTAATGTTGTTATAAACTGAAAACTGTTGT  
TGTGTTAGTTGTAGAGCTCGCGCGCTAGTCACTTTTCCCTTTTTTCCCTTTTCCCACTATTGCCCCACTTCA  
TGAATTTCCCAATCTCTCT  
>locus0556  
GATACGTATATGCATGCATCGTGCCTGGGAGAGCGGAGTGGCGTAGAGCTAAAGGTTGTGTTGTCCTCGGCGGCTG  
TGTCACGTTGACCTGTCTGTGACACTTGCAGGCGCTCAACAAGAGGAGCATAAAGGCGCCATGTCGCTGAGAGCC  
GGAGCCGACCCAGCAGGAGT  
>locus0557  
ATTGCAGATGATGAATGATATATGCGATGAACTTAGAACTAGTATAAGTAAGTAAAGTTTGGCTGGCGTTACGTACAG

TACTTACAAAGCCGTGCTTGTGCGTGATGTTGTTGTCAGCTTGAGCTTGTGAAAGCTTACGACTTTTGCATCCATTGC  
TCGCCGTGCTCGCGAGTC  
>locus0558  
GGACTGCCATAGGTGCTCTCGGGGCTTCGATGCGCGCTTCGAGCACCGTTTCTGATTGGATTTTCAAGCTAACAAAGAA  
AATATATATCGAGATTGGGTAGGTAATCGTGTGGGACATCACAGTTGCGAATGAGATTTTACACACTTTAAACCCCGCT  
CTCTCTCTCTCTCTCTCT  
>locus0559  
GATAGAGCGAGGCGAGTGCAGGTGGAGTAAGGTGCTGCGGCTGACGCTGGGCATCGAGGCAGCTCCCGGGTATCTATCG  
GATAATTAGCCGGTGATTACGTGGCAGTATTACGGCGGATATCAGCGCGCACTCGCAGCTCCCTCCTTCCCGCTCCTAC  
ACTGCACTAGCCACCACCGCGT  
>locus0560  
AACGAGTGCATAGGAGAGAGGGGGGGCGGCGGAGGGGGGAGCTTATCGGCGCGCTGTTGGGGTACTTACCCTCGGATCC  
GGCCACTCGACCCTAATCAAAGTCTCGTCAATCGCATCGCGCGGAGTAATCGTCCATTACCGGACTCGACATTGTCC  
GGTCGGCTGGAGAGAAAA  
>locus0561  
GTCTTACATGGCGCTTGGAGAAAGTGCAGGCTGTTGATGGCGACTCGAGTGCATCCGATTTAAAGGCCAGTTAATGCT  
CTACATCTACCCTGTAGATCCGAATTTGTTGAAGTCAAGGCGACAAATTCGGTCTAGAGAGGTTTGTGTGGTGCATACA  
ATGCTACATGGTCTGATTAAATTTCAAATTAGCAACGAAATATGTTGTCGATTTAGTTTCAAGTTCT  
>locus0562  
GCGCAGACACGGGAGAGAGGTTGCAACGACGACGACGACGAGGCGCAAGGGACACGGAGTAAGAGCTCTAATTGCAAT  
TCAATAAAGCAATTAATAGCAAGCTCATTAGAGCCGAGAGGGACTACACCCTGGTGAATAGAGAGAGGAGGAGGA  
GATGGAGAGCGAGAGAAAG  
>locus0563  
ACACGGACGAGTGCACAGAGAGGAGGGCGCACAAAGCGTGTGATGTCACCGTGGCGCTTATAGTGTGGATAATAGAGT  
CCGGACTTTAATGGACTCGCTAATCCTCTTCCAGTTTGGCGGAGAGAGTAAGGGCACACACCGCGCATCACTG  
TCAATGCGAGCGAAATCC  
>locus0564  
GAGAGAGAGACAGGCGAGCGGAAAAGAGGGATGATTACCCGTAGCGGTAGTGGTAGTGGTAGTAGGCGAGCTGCCGGA  
ATCCTCCCTTTGTAATTTGCCCTCCGTGACCCCTGTCAAGTGTGCCGCGCGCTGTCCAGCGCGTGCAGCCCTATACCCAG  
ACGGCAGTCTCTTTCTCAC  
>locus0565  
GGACGAGGCGACGCGGAGAGAGCTTGGCGAGCTTTAGTTTCGCGCGCACTCGTCCCGCGCTGTCGTGAATATGT  
CGCATTTACACGGGAGATGGCGCTATTGCCGCTAGGACCGCGAGACACCCCTCCGCTGCCGACCGCGCTGCTAT  
ATGGCCCGGGATCAAAAA  
>locus0566  
CGGACTACCCGCTGCCGACGAGCGAAGAGGAGGGAGGGCGAAGCGCGACTCCGAGTTCAGCAAAATGATCAAAAGG  
CAAATTTACATATTTTCACTTTAATGCTACCTTATCGCAATTTATGCCGAGGCTCGGATTTATGCCGCGCGGGA  
CCGACCGAGTCCGCGCGT  
>locus0567  
TGTCGAGCTCGAATAAATGGAAGCGAAAAACCGAGAGCGGTCTGTCATTAGCCGCTCGCCGAGAGTTAATCTGATA  
ATCTGATTGGCTGCGCTGTGCTAAATATTGCCGCGAGTCCGCGCGTCAAGCCCGGACTGGTTTTCCGCGCTCGTGACCG  
AAAGCGACTATGGGTAATAT  
>locus0568  
CCAGAACAGGGGGGGCGCTGCGGCTTCCAGGGACAAGGGCACTACTACGCGCGACTTACAACTCTCTTACTAAT  
TAATTAACAGGCTAACAAATCAACAGAGTCTCAACACTCAAAAAAAGAAATGTTTGTGTAGTTGTGGGTGTATCGGTATG  
TGTTGTGTTGTGTTACATG  
>locus0569  
AGAAAAAGCCCGTTGTACAGAGTCCCAGCGGTAATGGCATTGCAAGATCCACGATTACACACACACCGCACATCTGTGA  
ATCTCTCCAGTGCCAGACCCCGCAGAACCTCGACTCCACTCGGGCAGATATCACTCCTCCTCCTCCTCCTCCTTCTT  
CGTACATACATCGAGAGGAAG  
>locus0570  
GGACGTTGTTTGTGCGCGCGCTACTCGCAAGAGAGAGGGAGGAGAAGAACAATTTACTTGGCCGAGCGGTTTTATT  
GTATTTAATCTTATTTAATTTACTTTTTACGGCTGCGTGTGCGACGCGGAGCTGCGGCGCCGTTAACGAAATGAAGC  
GGGGCGACCGCTGCCCTC  
>locus0571  
CGAGCGAGAGCTGCAGCAGCTGCAGAGAGAGAGGAGTGTACATTGTTATCTGATCAGAAGTTAAGGTTACCTTGAATG  
AGATGAATGCCTTTACGTGTCTTTCAGACTTGCCTTAGGCATATATTCATTTCAGGCTTTCAATTTCAAGAGCTGCTGCTG  
TGCTGGCTGCACGCTCTGC  
>locus0572  
GAGCGAGAGAGCGAGCGAGCGAGCGGGGGGAGATAAATCGGAGAGGGGCCAACCGGCTCTCTCTCAAAGGCCCGCGG  
GACGATATCAATGCCCTGCTTGCAGAAATTTCCAATTCGCGGATACACAAAGAAAAATACCAATCGAATGCCTG  
GGATAGCGCAACGAGCCCGCCCTCCCGCGCTTCTCCTCGCGCTTTCGAGTCTGCCGCGCAGAGAGAG  
>locus0573  
CGCCACCCGTTTACGTACCAGCGCCCAAGCAACCGCCAGCAGCAATTTGCCACCTACCAGGGATTACACCC  
GGGTGGTACCTAGACACCTAGTTGATGATGACGCTGTACCCTTTTATTTATCTATCTTTTAGGATTAGTTTCT  
CATCATCTATCTTTTT  
>locus0574  
TTCTCCTTTTGACCCCTGTAGTAGGCTACCACCTTAGCGCCACCGTCCGACGTCACGGAATTCGTACGAAAGTCGAT  
CACGTTCCACATGCTGTTACGTACTCTCGAGACCCACGTCACAGCTGCTTTACCTCCGACAGATCAGACCCGACA  
CCCATGCCAGTATGAACCTG  
>locus0575  
CGGATAAGGAAGAGAGAGAGAGAGAGTTCGAGTGCAGGCGGGGATCCAAGACTCCGGTCAATTAAGTGCAGGAAATAGAGT  
TTAATTCGCGACTCATTAGAAAATTAATCATCGTTCGCGGCTCGGAGGAGAAGAAAGAAAGCGCGCGCCCGCTCGC  
CGCTTGAAGTCAAAGCC  
>locus0576  
ATTTAAAGCTGCCAAACTGGATAAATCAATGGAGTAAAAGAAATAAATAACCGTTGAGAGAATGGGAAATATTT  
TGTGATACTTTCTGCGAGAAAGATAACAACAGGCTAAGCGGGAAATAAATAAATAAATAAATAAATAAATAA  
AAAAATGGAGGAAAAGATGCA  
>locus0577  
GAGAGAGAGAGAGAGAGAGAGAGAAATCGAGGAGTGGGGTAAGTTTTCAGCCATGATTTCCATTCCCGGCCATCCATCT  
TGTTGAGACTGGAACCTGACAGATAGACGTGGATCCGAGTCCGCGTGCAGTACGAACTTCTCTGTGACCCCTGTAT  
GTAGATATTGTTCAATTT  
>locus0578  
TCTCTCTCTATCTCGTTTGGCCCGGTGCTATTCTTTCTCCTCTCCGCGCACAGTTATGGCTTGGCGTGTAAAGGAAA  
CTAATGTTTATTTGAAAAAATAAATGAAACGGGACTCTCTCACTCTCTCTCTCTCTCTCTCTTGGAGCGGAGCGCGCGG  
CGTCTACAGTCCGCAATTA  
>locus0579  
GCGTGTATTAAGCGCAGCGATAACGACCTGGATAAATCAGCGGAGATGTCGCGCGAGCGGAGCGGAAATCAATAATA  
ATGGCAGGAGCCATTAGTAAAATTAATAAATACACCTCACATTTATGTGCGCATTTGAGTCTCGGAGCAGCCAAACCT  
CCGCGCGGCTGTGTGCTGCT  
>locus0580  
AGGGATGAAAGGGCAAGATCGAAAGTCGAGAGTGGGGTGGCTGCTGCTGCTGCTGCTGCGACCTCTTAACTCCTGC  
AAACTCATTAACAATAAATCAAGCTTTGTTCTTCGACCTCGGCTAGAACCAGGGGACAGCAATTTCTCGGGGTGCTAAC  
CTTTCGAAAGGGCGCCGAC  
>locus0581  
TGTCGTAGCCGCTATTCTCACTCAGTGGAGAGAGAGAGAAAGAGGCGCGAGCCCTTACTAATGGAGGAAATAA  
TTTCGGATTAAATCGTAGCCGGCTACTTTATAAGGCTGCAGCGCGCAGCAAAAGACGAGAAAAAAGGGAGTCCGCGCG  
TGCAGTCAGTCCGCTTTTT  
>locus0582  
CAACACAAAAGCTAAAGCGGGGAGAGCAAAAGGAGCGTCTCGATCAACGATCAATCGTAAACGGTCCGCGATTATTT  
CACGTCAGTTAATAGCACGCGGCGCGGTGACGTCGATAAAACTCTCTCTCTCTCTCTCTCTCTCTCTCTCTCTCTCTG  
AAGAGCAAAACCGGAGGGA  
>locus0583

TTCGGAAAAATATTGGAAAAATTTCACTGGGATTTCTGTCAATGCTTACCGTTTAAAAATGCTCTCGTATTCGATCCCTCTCGG  
ATGTTTTCGGGAGATTTCACCCACAGGTGACGTGTCTCTTAACCATTGCTCCGAACTTCATTTGGGATCGGA  
TGTGTGTTATCGTTTGGCGGCACTGTACAACGACACAACTCACGAATCCCGGTGTTCGGTGCAG  
>locus0584  
AACCGGAATGAAACCGCAGACTGGCGCTGATGAAATTCATTAATTTAGATCCAAATGCGCTCTCTCCGTAACCTCGTTTA  
GAATACACTGCTATTTATAGTCGAAATTTCTCTCTCGGAACGATCTTTCTCTCTCATCTCTCCCTCTGCTTTTTTCC  
TCTTCTTGCTATACTGCCG  
>locus0585  
ACGGAGCGGATTCGCTGCTGGAGGAAAAAGCGCGCGCAGGACAGAGTGAAGGGGGCGGCTGCTGCTGCACACAA  
CTTGATAAATAAACTGAAAAAGGAGCAAAAGACGTTATTTTAAAAAGGAAATGCAGAGCGTGGCCGATTTTTATGCT  
TCGCCAGAACTTTTCATCTC  
>locus0586  
CGCCAGCAGCCGAGCGGTATATATATACGCGCGTGAAGCGGGTCAATCCAGAGTTCGGTTCGCGAGCGCGTAAAAACG  
TCAATTAAGTGTTTTATTTGATCCTTCGTTAAAACGTTGAAATGAAATTTTGATTTATGACAGAGCGCGCGCGCGG  
AGAGAGAGAGAGAGAGAGAG  
>locus0587  
GTCGCGGTATAGTGCAGCGCGCGCGGCGGCTCTTGGCATTATACTCACAGTGGCGCGCTGCTCGCGTGGCGTGG  
TTTCAAGGACAAGGCAAGGTTGACACGCGCGCGTCTCGCGACCGAGAGACCGGCTGGTGGGGGAGCCATCGAGTTCTC  
TGCTCCGTGCGAGCGTGGAG  
>locus0588  
GTATGTGTGTCGCGCGCGGGGATGAAAGTAGCTCTGGCTGCTGATTAAGTTGAATGACCGAGCGCCGAAAAACAC  
ATTAACACTGAAATGAGTACAGATGAAATTTGGTCTGCTGGGAAATCAAGTACCGCGGAGTAAATGGTCTGGCGGTCGCG  
AGGTCGTTCTCGTGGGCTT  
>locus0589  
TTTTTTTCGCGTTCGCTGCCGCGCGCACTCTCCGTGCTCGCTCGCTCGCTGTTTTTTTTCAATTATAAATCTTT  
TTCGTATCCAAATCAATCATTAGTATTTCCATTGTCTTCCGATTTTCATTTGGCGGCTGGCGGCTTTCTCTCTCTC  
GCCGCTCCCGATATATAGC  
>locus0590  
ACAAGAAAGAGAGAGAGAGGCGGCTGCTGACTCGATATACGAGCCGAGTCAACATATATCCCGTCAAGTTTTTAA  
ATGCCCTGATTTACAATGACCAATTTGACTGTCCCGTGGATATCTATTGTCTCGACCGTGTGATATAAGCTCTTTCTACT  
GCTCCCTATAACCTACCTGT  
>locus0591  
CCGGTCTCTCTCTCTCCGCGCCAGCCACGCCATCGACGAACCCCTCAACCTACTTTTTTTCAATTCCGCTCATCA  
ATTGATCAGGTTTTAAATTTCCGCTCCATCCGAGCGCGCTCTCTCTCCCTCAACCTTTTTCTCTTTTATCCCC  
TTCCTATCTCTCTCTCTC  
>locus0592  
TTTCAGTCGATAAAAGAGGATGACGAGCAGCAGTAGCGGGGGCGCTCACACAGGCCAGCGCTGCATACAGGGGAAGA  
AACAATGAACAAATTCGCGTTTCAAGATAATGCCTGGCGATCCCATCTACCTGTACAGTACCTCTTTTACGCCCTGG  
GCCCTTTGCCCATCCCCAC  
>locus0593  
AGAGAGAGAGAGAGAGTTCACCCCTTGTGCGCGGTGGCGGCGGAGACCGAGCAGCTCTCGTAATTTACATTAATCC  
AATAATTGCATGGAGGTTTCTTAATTTAGAAATCAAAATGAGGTGGTGGCAGGAGGCTGGGCTCTGCACAGGGCTACCAA  
CTCAGCAGCAGCAGCAGTAG  
>locus0594  
TAAAAAGCAAATGATCAGCGTCTCCGACTGAGAAATATCGGAAAGTACAAAGTAAAGCTCTCTCGACCGCGCAGCGCC  
AGAACCATAATGTGCTCGCTCGCAGCGCGGACCGGAAACTTCGAGGTGACCTTTGGCCACGAAGGCCACCATCTACCA  
GGGCTGGTGCAGTGAAGGCCCGCGGATATACAAGTCTCTCTGCGAAATCGACGCTCGACTACTT  
>locus0595  
GAGAGAGCAGAGCAAGTCCATGAGAACCCTGCTCAGGAGAGAGCTCACGACATTTAACAAGCAGTCTACATATTATA  
CATTCGACTGGGATTTCAATTAAGTTTGGTTAGACCGTTTCTATGGCCGTGCGCCGACGCGGCTCTCCCGCAGCG  
ATATAACCCAGCTCGCGCT  
>locus0596  
GTAAAAAGAAAGCGAAAGAGTGGGAGAGTATACGGCTATCGGAGATGGGAGCGTCGAGGGGGAGGCAAAATCAGAAACCT  
GATTTAATTTAGTCCACAGTTTAAATTTACTCAGCAGATAAATCGTGCACGTGACCCGATAAACAGCGCGCTTTCAATTTT  
CGCGGCGTGTGGCACCTC  
>locus0597  
CGGGAAGCGCTGCCGCCCGCTGCCGCGCAGAGCGGGGAATGTAGCAGTAGCGGCAGCCCGGAAAAAGAAATATCTGCG  
AGCTGTATTGACGTTTCTAGTCTAATCTGATTTGAATTTATGCATGAAGCACACCGCGCGCGCGCTTTCTCTCTCTG  
CCAATTTATGCTCGACT  
>locus0598  
ATAGCCGAGAGAGCTCGAAGAAGAGGGGGCAAGCCGACCGCGCTTGGCGAGCGGAAAGTTGGCGATGACGGCGGA  
TGTATTGGCAGCGGGGCCATTCTGTCGATGATGATGCTGACAGCGCTCGCTCGCTCTCTCTCTCTCTCTCTCTCTCT  
CAGTTATAACAAGTAAATGGG  
>locus0599  
GAGAGAGAGAGACAGAGATATCGGGAGGGGTAGTGCAGCGCGAGTGGCGGACGGTGGCCGAGGCTTTATAAACT  
ATTCCTGTGTCTCTCTGGTATTATTTCCGACTGTGATTTATCGGCTGCCATTAATACCGCGGGCTGCGCTTTATT  
CGTCCCGCAAGGACGAA  
>locus0600  
GAGATCCTCCGGTTGAAGTGCAGCGCGCAGAGTCAAGCAACGGTTATCTCGCAATTAATATGATTGAGGAGAC  
ATCTCTCAGCTCCGTAATCCAGCAATGGCCAAAGTCTGATTTGCTTCTCTGCTCGCGCGCGCTCGCGCTTCTG  
CTCTCCGCGCTATCTCC  
>locus0601  
CGAGTCTTCCCTTATAATGGCGGGACTACTGCGTTAGCGCAATCCAAACGAGAGCGTTACCGCGCTGTTTTGTAAT  
TTAAATTAATGAAAAATATGCACCTGTGTGCTGTGTACGTTTCGATTTGCGCTGCGCTACAACAGCAGCGCGCAGGAA  
TATAACGGGACACACGTACA  
>locus0602  
CCTCTCTTTGCTCGGATTCGCAATTCAGCCTGAGTGAAGGAAAGGGGGAGGTGGTAGGGGCTCGGATTCAT  
TATCCGATATAAACTGCCCTAACCCGTCGCTGCTGCTGCTGCTGCTGCTGCTGCTGCTGCTGCTGCTGCTGCTGCTG  
CGTGGGTTCAAAATGGCTG  
>locus0603  
GCGCGCGCTGCTGCTGCGATGGCGATAAGGGGGTTCATTAGAGGCAAGTTTACTGCTCTTGAAGTCTCTCGCGTGT  
TGCGTTAAGTCTGCTGATATCTCGTAATATCTCGCTCTAATCTCGCGAGGAGAAGTAAATGCTACCGCGCACCTTCC  
TCGCGCAAGGCACTCTCT  
>locus0604  
TGATTTTAGCGGAAGCTTTGTGAAATGAACTGGCTGAGCGCGCGCGCGCTGCCATTAACAACAATAAAAAAAT  
CCAATCCGAGCTTTGTTGATCTATCAGCGACTATATTTGCTTCCCAAAGAGCCCGCGGCTTTGATCGCTGTTACAC  
GCACACACACACACATTT  
>locus0605  
TAGCAGAGCGTGGCTATTTAAACTCGCGGCTCGTGAGCGCCACCGCGCGCGCGCTGATTTAGTGTGTTGAAGT  
AAATGAGTCTAAATGGCAGATAACAAACAGCAGCTGTTCCGATTTACCGATTCAATGTTCTTACCATTATCGCGCT  
CGACGGTTCGCGCGGCTCCCGGTTATGGTTTACGATCTATTTATTGCCACCGCGAGCGTGCAGT  
>locus0606  
CAGCTTATGAGTAGCCACACATATGAATTCAGTCTGTCATGAGTCACTATTGGTATATCTGCTCTCTGTTTTA  
GCAGTGGCGGTGGCGTGGTGGTTATAACAAGGTAATGCACAGACTCTCTGTACAAAGTCTGGTGTATTTGCTGTGCTG  
CACTTAATATTGACTT  
>locus0607  
GGAAAGAGAAAGTTGCACCGCGAGCGCGGAGATTAGCCAAAGTGAACGAACCTCGAGGACCGATGCCAGTGAATC  
GTTGGCGGCTCAACAGGTAACCCACACTAGCTCTCTCTCTGCTCGCGGCTCTCTGCACACAACCGTCTATGC  
AGCCCGAACGTTATAAGCT  
>locus0608  
GAAGCTCGCTGCTATGTAGGAAAAAGTATATAGAGCGACCCAGCAGCAGCGCGCGCGGAGGATTTGAGCTCTATA  
TTCCATAAGCTGATATTTACCGGCAATATACGTGGCGTACCGCTACTTTTATGAGCTCGTAAATATAGCGCGCGC  
CGGAAATGGCTGGCAAGG

>locus0609  
GGCTGATATATTGGCCGCACACATTGCCTGGATGGAACGCAATATGTCGGCCCCGAGAAAAGCAATAACCATTAGGTCC  
CGAGAAAATGCCCCATTCAACGACACGAACGGTGCATATCAGAAAATTTATATCCGCCCTGGTCGGGAGCGCGCGC  
AAAAGTGGCCCGCGTTAT  
>locus0610  
GAGGAGAGAGAGAGAGAGAGAGAGAGAGATGTTGCCGCCGAGAGTAGGGAGCGCGCGCGTAAAGCGGTGAA  
ATATCAAGCCGGATGGGAGTGTCTCGTCGAGCCAACTCATGGTGGCGTGTGAATTAGAAATGCCCTCCCACCGT  
CGCCACGCTTGACCTCCC  
>locus0611  
CGGGGTGTTTTTATGGCCGACGGCGCGGTTTCGGTTCGTTTCGTGGTAGGCATTTTTTCCCTCCTAAACTCCGTTATACC  
TGGAAACAATGGAGAGATAAAACATAAAAATATGATCTCCAGGTGATACGCGCGCGCCGAGACACTATTAGTATAT  
GCATCAGAGAGAGAGAGAGA  
>locus0612  
GCCGATTACAAAATTTACCCGGTGCCTCGCTATGTGCATCATGTAGAGCGCGGGAGGGGGCGAGCGGTAATGATTGAA  
AATAACAGGAATCGCGTAAACGTGCAATCATCCGACAGGGCGTCTCCACAGTCGCGGTGAGTATCATGCGTTTTTTTC  
TCTTTTCTCGTATTTCTAG  
>locus0613  
GCGCGAGAGAACGGATGATCGTAGTCGTCGTCGGTTCGCGCGCGGAGCGGCTCTGTTTTGGTATGCCAGGAATG  
GCACAAAATCTGGACAACGACACGCTGCTGGCAGCGCGGTCGCGCACAGCTCGCTGGTTCGCTGTCAGGGAGC  
GAGCGCGCGGGGAGAGT  
>locus0614  
TTATCGTCAGCGAGCGGAGAGAGAGAGAGAGAGGCTCTAATGATGATCTACGGCCGCTACCGCGCACAGCTT  
CTATAACCTCTCTAATTTCTCTCTATAAATTCGTCGCTGTTTATTTATGAACAAAAGAGAAATATAACGCTCCGACAC  
TGCGTCAAGGGCACACCGG  
>locus0615  
CGGAGGAAGCGGATCAAGCCGCTCAACGCCCGCGCGCGCGAGCGACTTCTGAACCTGTGTGGTAAAGATTAACGT  
TCTTTAATGGCCGCTGTAATTTCCATTCAGCGAGCGCGCGCCGCGCAATTTCTCTCGCTGCTGCTGCGCGG  
CTTTTGCAGCGTTGTTCTT  
>locus0616  
GCGGTCACAGAAATTCGGATGTGACTTCTAGGTCGGAGCGTGCAATCGAAGCCCAAGAGATGTTTCGGCAAGTCC  
AAGAGCAGGTATGAAGTCTCTACTTCTGAAATCTACGTAGGAAGTCTATACCTCGCTGCTGATCTCTACCATATTA  
TTGAAATCACTGTTTCGGTAATCTCTCGGCGTCTGATCCACGGCGCTCGATGTTCCCTCACT  
>locus0617  
CTCACGATGACGCTCGACCATACCAGCAGAGCGCTACTTTCAGCAACGCTCTCGACTACCTGAATATGATATTCATTGT  
GATATTCACCAGCGAGTGTCTCATGAAGTCTTCGCGTCGCTACCATTACTCAAGAGCCCTGGAACTCTTTGATT  
TTGTTTCGTTATATATCA  
>locus0618  
TAACCTCGTAGCGTCTGTGGCGCGGGCGGAATCAAGCCTTCAAACAATGCGGACCTAAGGGCCCTAAGGCCAC  
TCAGGGCGATGCTAGAAATGCAAGGATGCGGGTATGTAGCCCTACGCTCAGCCGAAATTCATGACACATACTACC  
GACTCTCGTTTATATAT  
>locus0619  
AGACGAACAGAAGAAGAAGCAGCAGAGACAGAGAAGCAGCAGCAGCGCGGTTAGATTTGTTTAGTTGGCTGCA  
ATTAAGCCACTGGCGCAATTTGTTGCTCAGCAGAGAATTTCGCCGGCAGTGCCTGTCGCGGTATACGTTCTTA  
TCTAAGCCATAATATACA  
>locus0620  
AAAAAAGAGCTGTGTACTCTCCGAGAAAGCAGCGTATGCGGAGTAATATGAAGAACTTTGGTTAATGTTTTTAAAA  
ACAGATGGGCGCGCGCCGAGCGGATGATATCGGCGTATCAATTTGGGAGACGAGAAATTCAGCCGACTCGGATAAA  
AAGCCTCGCGCGGACAAAT  
>locus0621  
AGGATATGTATACGTGCGGGTGGGGTAGGGGGGGGGGAGGAGAACCACAGAGCGGAGCTAGCGTAGCATGGCAT  
AATGATAACACGCTCGAATAAAGGATAGAGCCCGCGCGCGCGCGGCGTGTATACGCCGAGTAGCGTAGAG  
GAGACAGGTTGGATACGCA  
>locus0622  
CTCTCTCTCTCCGTCGGTGCCTGCGAGCAGTTCGTTGGTTCCTGTTGGTTCGAGGGGTTTCGGAGCCGACAGCGCC  
TACTCTAGTCGCGCAACCGTGTGTTCTGATGGCGCGCGCGCTCCATGGCTCCGTCAAAATTCAGCAGCGCGCA  
TGCGCGTAGATCTCCGCA  
>locus0623  
CTCTCTCTCTCTCTAGCAGCTGATAACAGCGCGCGCGCGAGCAGGAGGACCTGGAATTTCTAAGCTGTGTA  
AGATATGTTAATTTGTTTACCTATAAGCTATTAAGGGGCTCTAACGCTTAAAGCTAAACAGTTTAGTTTCGCA  
AGAGATGTTTCAGCGCTC  
>locus0624  
GCAAGCTCTCTTCTCTCTCTCTCTCTCGCGCAAGCATTCCAGGAATAGGCTGTCACGAGCGGTGCCAATGCAGC  
CACTAACTATAACTATTTACTAGTATCGTTGACGTGATGCATTCGATCCAATAATATCTGCGACCGCGCAGCGCGCA  
CGTATCTTGTGCGAGCGCAC  
>locus0625  
GAGATTCGGCTCGGCCATCCCCACCATAGTATAACCTCTCCAGCCAAATGCATCGGTCCTCCGGTAGCTTTAG  
TTTTCAGTTAGGAGCTGCTAGGAGGGTCTCTCTTTCTCTCTCTGGAAGAGTGCCTCGCTGCGCGGCA  
ACTCACTCGCTCAGCCGCA  
>locus0626  
CGCGCGCGGTGACTACAGTAGGTTACTCCTCTCTGTGGCGGGGAGGATATTGTGATTTAGCGTCTGTGTAAT  
ATGGAATTAGCGACATGAAAGCCTAGGATAAAGGGTTGATATAATCCAGCGCTGGAGAGAAGGGCGGGCGGAG  
GGAGTCTGCGCGCTGAGAT  
>locus0627  
TACAAATCGCCGAGCAGCAGACTTTAAAATGAGACTCGCTTGCGCACAGCGGAGTCAAAGAGCAATATAAAGCATT  
ACAACGAGTGTCTAACCGCTGCAATCGCGCGAGGCGCGCAAAATAAATACAAAGTAGCGGCTATTCTCTCTC  
TCTCTCTCTCTCTCT  
>locus0628  
TATACACTGTCTCTCTCTCTCTGACGCGGAGCACACTGCAGCTCGCATATCAGCGGGCTGTTGCGGGCAAGGAAGGTT  
TAACGATTTCGCTAGCTGCGTCAATTTACGACCCCTAAAACACATCGAATGCGCTTTATATGATGTAATTAGGTACG  
CTTTCTCTCTCTCTCTCAGCAGCAGCTCCTCTTGGTACCTACTCTGACATTCGCCATTA  
>locus0629  
TTAGCACTCGCCGCGCCAGAACATAATCCGGCTCGCAAGAACGCGCAAACGGGATGACCGCTCCGAGCTATTGCAT  
ATAGAGCGGTTAGCTAAGGAAATAGAGGTTGATACGTCGACAGCACTACTCAGCCCTGCCCTCTCCGCTCC  
CGCTGAGCGCTCAGGACT  
>locus0630  
TATCGGACACATCGCGCGCTGAAAGAGAAGATAGTTCGGCTATGGCAATAGCCGCTGACGGCCGCGCTAACGACCG  
TTTATGGGAATAACGTATAAAATGAATGGCTATAAAGCTGGTAGCGTGGCAGAAATCTGCGGAGCGAGCTAGCGG  
GCTCGACTCGTTGTAACG  
>locus0631  
TGCTCGAGCTTATAGTGGCGCGCGGAGTGGCGAAGTGAAGGTTGGAGCACTCAATTCATCAAGAGTTCGAGGCA  
CGTAATTTAAGACTGTTTAAGCTTTGGGTGTCGCAATTTATGTAGCTTCTATAAAGAAATGGCGCTCGCTAGCTA  
GCTAGTACCACTGCACCC  
>locus0632  
CGGATAGTAGGGAGAGGATGGAATATTGCGCGCTCCACCAGCGCGCGCGCGGCTGCAATCCAGTACCAGCT  
GCTTTCAAATATAATGTCACGTGACTTATTATATCTAGCTGCGCGCTCCAGGCTTCCAGAGAGCGAGGAAATAGA  
AGTAGAATAAGGGGGAGT  
>locus0633  
AGCTATAGAGATCGAGGAGAAGAAGTACGCGCGCTAGTTTCGCTGCTGGTGTTCGCGCGAGATGCATTTGGCCA  
TCAAATAACATCGGCAGCGCTATAACCGCTTAGCTACGGACATAAAGTCCGCTGGCTGCTCTGCTCGCGCGT  
TTCCGCGCAGCCAGCTTT  
>locus0634  
TTCAAAGCCGCTGCTGTCGACTGCTAGACTCGAGTCTGCGAACCTCCGTTATTTCCCTTACCGTGAATAACCAT  
TTGTAATTTCAAATAGCTTTGCTAATAGAGATGGAGGATTTGCGCCCGCTGTTAAAAAAGAGGAAGAGTCCG

AGCGGCGGCGGCGTGGCGA  
>locus0635  
TTGGTTGGTTCGTTTCAGCTTTTAAATGTCGCGTCTCTCGGGGGCCGCGACGAGGATTACCCCGGCTAAAAAGGAAGTTTT  
TAATAATTTTTCATTTCTCTATATTTATATCGCGCTCGCTAACCATTTGCTGCTTTACTCGCTGCCCTCTGCTTTGCG  
ACGCGGCAATGGCGCGC  
>locus0636  
CTTTCTTTACTCTCCGTTCTGTTCTGTTCTCTGTCACCGGCAATGCGCCGATAAAAAAGTCACTTCCGCGGATTGGGTAATA  
AAGTCCAATCAACGGGTTAAATTTTCGATTACCGCGGGGCTGCGCGACGGAGAAAAAGTGGATCGACCCGGCAGATCAG  
TTAAGTGAAGCAATCGACA  
>locus0637  
GCGTCCGGGAACCAAGCCTCCGAGTTCTCCGCGGCGAGCACGGGAATACAATGCCTCGAACCCGAGACTCTATCGCGA  
TATCATCCGGTATAAATGGAAACAGCTTCGCTCTGGCATATGATGCTCTATATATGCTTTTTTCCCGGATGCTGCT  
GCTGTACTGTGTGTGTA  
>locus0638  
TAAGGGCTCGCCCGCTGCCACACAGACAGAAAACCTTACGAGCGCTCATCCGCCGCTTTTTTTTTGCTCGTATATC  
AGCCGCTCGGTTTCGAAATTTTTTACGCCCGCGGTTCAAAGGCTGCGCGCAGCCGATATCGCAAAATCGACGAGAC  
GCCCGCCCGCCGCCCT  
>locus0639  
ACTGCGTCAGCTACGCTCCGAGATTCAACATCGGGGACTGGGACTTAGTTCCTTAGCAGGATCGCCGGAGGAAGTAGA  
GTGGGAATGACCGTAATGGTAGACAGACCGGCTCTGTTTTATACCGTCCGCTGCATACTCGCAAAAGTCAAAAGTACTT  
GTTTTCCCGCAACCCTAATGCAATGGCTAATTTTTTGTGTGTGTTCTTTCTTTGGTAC  
>locus0640  
CGTAATAATCTCGCTAATTTAGCTTCCGGAATACGGTAAGTATCGTTAATTTCCGGGACCGGTGAATAATGGATGT  
TGATGCGCAATTTGGGCGGATGAGATTTCCGAGGAGCGAGCGGGGAGCGAGTTCGAGCGGCCAAGTGGACCCGGTCT  
CTGACCGGGTTGCCGCCG  
>locus0641  
CTCGCTCCCTCTCGTCCGATGCGAGCGCGCAGTCCCTCCGATGCCTGGAATGCAGAATGCAACGCTGACCACACA  
TCAATTCACCTGCAATGGACATCAATACTGATAATTAATACATCGCCCTCTCTACCTCCGGCATTGTCTCTGCTCT  
CCCTTCCCGTCCCGCTG  
>locus0642  
GCCTCCCGAGCGTGGCGAAGCGCGCTGGAAGGAACACCGGCTGCGAAACGAAAAATAAATGTAAGTGGAAATTTATCGCC  
CCGGCGATAGGAGACCTTCCGTAATTTTAAATATTTATAAACTTTCTTCTTCTCCCGCGACTCCAGGAGCGG  
CGGAGCAGGATGGCGGACG  
>locus0643  
GCCGTAAACATCGATGTATATTTCCATTCCGCGGTTACGAGAGCGGAGTGGCCGCGATTTTATATGCAAGAGTAGT  
TTAGAGCTAATGTTAATAATAGGATGGTAAGTGGGAATACGCCCTTCCGCGCGCGCGCGGAGCAGCCACTACCT  
GCTCTTCTCTTTACCGCT  
>locus0644  
CTCTCTCTCTCGCTCTCGAGCTCTCTGTTCTTGTCTCGGCAAGCGCTGCGCGCATTTAGATAAGTAAACTATAAATTA  
GACGGATCACTGGTAGCTACTCGAGAAACGTTGTGCGGCTCTGAATATGATGATTTATACAAAGGAGCGGCTCTCT  
CGATATAATTCAGACGCAAG  
>locus0645  
AGAGACGAGAAGGCGCGGATGCGAGCGCTGCGTCTGCGCGCAATGGAATATGAGACGAAGTGGGAATACGAATATGA  
GAATTAAGCCGTCGAGGAAATTAAGCGTATAAGCGTGGTGGGAATACCGCGCGGAGCCCGGACGCCGCTCGAGT  
CTCTCTCTCTCTCTCT  
>locus0646  
AATCACGGGCGAGAGAGGGAGGAGTAACGCCGCTCGGTTTATGATTTCCGCGCGGCGCTGGTAACAAAGATAACTC  
TATGCAATAAAATGATTCAAAGTTTCCCGCGCGGATGGCGGTTCCGATGCGCGAGCGCGCTTACAAATGGCGGCTCT  
TGCTCTCCCGGACCGCGC  
>locus0647  
GCCGCTTATAGAGCCAGCGCTCAGTCGGCAGAAATCTGCGCAACTGCGGAGCGCTAGATCCTCGCGCATATAAAGC  
CATAACGGTAATCCTTAAACAATAATAGCCCTGCGCGCGCGACCCCAACTTATACCCGAGGTGCTGCACTCGTTCC  
GCCGCGCGGATTCGTCGCC  
>locus0648  
CGGGCTCGTTTCATCCATCTCTCCGGCAGTACTCCCTCTAGAGTCTCGTTGTCGCTCTGCACTCGGCGATTGGCTAA  
TTGGGAAACCAATAGTTCTAAATTAATCGGCATCATTAATAGACGCGCGAGCTCTCTCAAATATAGTTGCACTCGAAG  
AAAGAGCGCGCGGAGAGAG  
>locus0649  
CCACGACGACGCGCGGAGGTCGCGACCGCTAGTAAATCAAGCGGAATATCTCGAGCGAACCGGATGACAAACACA  
ATAAGTCCCAATTTCCGTCATTTATATACGCTAGACCGCGGATAATATGACGCGGAGCCTTTGTCACACATGGGGTGT  
GCTCCGAGAGCGGGAGATA  
>locus0650  
TACGTATATATATACTGCGCACGCACACCGGAGGCGCAATCTGCGGGTGGTTCGTTGCTTATATACTGCCCGTGT  
CGATAATATCGGTGGCTGATTAAACCGCGCGGTTTCGCGCCCAATACTCTCGAGCTCCGATTTATTTTCCCGCCCTCC  
CTCCACCCCAACTCTCTACCCCTCTCTCCATGACCAATTCGCGCGCGCTCTCTCGCCTC  
>locus0651  
GAGCTGACAGCGCGCGCGCTCAAGAGAGGAGCTAGCGCGGCTTTAATGGCCGATCTCGAAATTTGTCGCA  
CATATATCTGCTGGCAGATTTATGAAGTGTCTTTCTTCTGAAGTGGGAAAGCTGCCGCGCGCGCCACTGTTGCTGCC  
GCCGGAATAATCCGCTCC  
>locus0652  
GCGAGAGGAGGAGGAGGAGGAGGAGACGGAAGTGCAGAGCGCTCTCGAGAGCTGGCTGCTGCTCGAGGCCACTGA  
AACAGCTGCATTCGCGGCTTAGAACTCGCGCGCGGAGGCGGTAGTGAATAATTTACTGTGTAATCCAGTCTCTAAT  
GCATGCTGCTGCTGCGC  
>locus0653  
ACCGACGACATCTCTGATGACGCGCGCAGCTCGAGTTCCTATTACGGCACGTAAGTTCCTAACCCTAACCCTGTTT  
AGCGGTTTTAGCGGATTTGATTAGTTGAGTGAATTTCCGAATGTTCCATCGCGCTCGCTGCTGCGTACCAAGCTC  
CATGCGTATATAGCTGCTC  
>locus0654  
AGCTGGCCGGCCGTATAGTATAGTCGTCATCGCCCGCGCGCGCAGAGCGAGAAGTGGAGTGGAGTAGAGGCCACCC  
ACTCTTTCCACAGCAGGTTTTTCCACGCCCCCAGCTAACCCCAACATCTTTTCCGCGAGCAATTCACGGGGCCG  
CGGTGGAGGGGCGCGCTG  
>locus0655  
CGAGTCTAATGATAAATCGCACCTCTCGCGGAGCTGCTCTCTTCCAGAGGCTGCGGGGAATCAAAATGCAATTT  
GTTATTTGTAATTCGAGTGTGCTTAATACTCGCGCGCGCAGAGAGAGAGGAGGAGAGAGGAGAGGAGGAGGATGG  
TTGAAGCGGAAAAGGGTTG  
>locus0656  
GAATGAATAAGCGCCGCTAACCAGATTTTGGGAAGAAGTACTTTTTTCTCTCGTTAAACCAAAAAAGTATATTA  
TATAGATATGATATTTGGACCATCTCGCAACAAAACGAAATGACGTTCTTTCGTTACGAGCAGCAACAAAAA  
AATAAATAAATACGGAGCG  
>locus0657  
CTCTCTCTCTCTCTCCCTCCCGCGCGAGTCTGTAAGTTCAGTGGACACCCCGCTCTCTGTAACATGGCTAT  
CACAAACGATCAAAACATAACGCATCAATTAACCTGAACAATAACCGTGGCGGCTATACCTAGTGCAGCGAGTGGCG  
GAGGGATGTCGAATGTTTT  
>locus0658  
GCTGGCCCGGAAAGCTCGGATGGGGAGGGGAGAGAACCGCTCACCTCAACGATCGAGTCAATGAGATCCATTGTC  
TCGAGTAATTAATTTGATTACAATAGTTATACCTGGCCCTTCGCGCTGCTGCTCCGCTATGATATCTCGCGCGCAA  
CGAGCGAGCGCATTTTCGTT  
>locus0659  
CTGCCGCTAGTATCCGTATACGTGATGTGTATGTGTATATGTTGTACAGAGGATAAGAAGGGCGGTGTCGACCGGAGCA  
GCACGGCTATTGCCAAAGAACCGAAGTAAAAAATACTGCTACACCAACCAAGCAACAGACTTTATTTTCTTTG  
ACTTATAGTTTCGCTTAAC  
>locus0660  
GCTCTCTTACTCTGCCCGGTGACATTTACGTTGGCCAGCAGCACTCATGACACCTTCGCTCCATTGTTCAATAAT



ATACAATACGGCTATTAACAGACTGATGCGACCCGCCCTCCGCCAGTCGCGTCATTCGTTGGGATATATGCGGAGCG  
AGCGAGGGCATGACTCGCCT  
>locus0661  
TCAAACTGTATATTTAGTTATACGCTCATGTGCGGTGGTAGGGGTGTATTTCGTAGTATTTGCAATGATGGCTCTCG  
CTACAGGTGAGTCGTAGTACATAAAACTTCTCCCTCTGCTCAGGTAGTGTGCGAAGACATACAGCTAGAACTCTTT  
ATTTGCCAATAACCTGCTACACTTGGTCTTTTATCATCTTATAGCTTTGTTTTTCGAATT  
>locus0662  
GGAGGGAGAGATTGCCGCCATTTTACAGACGCGCGGGGGCGGAATCTGCATAACGATCAGAGACCGTCGTGTTTTATCA  
AAGCTTTTCTCCGCCATCTGCATAATTTTCTGTCGCCAGCAGCAGCAGCAGCAGCTCCGCTAAGAAGCGCTTTGCAG  
CTCGTAGGTATATAACCGA  
>locus0663  
GGCGGAGCGAAGCGAGCGAGCGAGCGAGCGATGGCGCTTATATACGCTGTGTGCAAGAGTGGCGAAGGAGTGGTGGCCAC  
CCCTGGCTGGATACCGCGCGTGTGTTTACCTCTCCGCGTGTGAAAGTACTGCTGACGCGCAAGCGCGTGTGGGCAG  
TCGCTACGCACACACACA  
>locus0664  
GACTCAGAATATACGAGAAATAATCCTCGCGAACGCTCATAAATGTGCCTGCTTATATCTTGGCTGTATCCAAGTTTGA  
ATGGCAAAGGCGAGTGTGTTGGTCCATTTTACTTTTGTAGATGTCTATTCATTTTTTAAATTCAAAGTAAATGAAAGGA  
AATCTCAAAGTAATCTAA  
>locus0665  
CGATAGTGGTAACTGTAGTGCCTCCCGCGCGCGCGCGTGCCTATATTACGAGGATTAGTTCGAGCTCGCATGCTCG  
GAGACTGATGTGACCGAGACCGCTCGTTGAGACATGCGAGCTGGCTGTATCGCCCCGAAAGGGAAAAATGACCGG  
AGATCGACGAGATTCCTCGA  
>locus0666  
GACAGCAAGCCGTACCTTCTAGTTTAAATTTCTCGTAACTTGAATAAGAAACTTGAACCTAATAAACGATACGCTAC  
GACTGTGGTAGCTATGCTAGTACCTGCTATTATTAATAAAAAAACAATAAACAACAAAAAGAGTGGAGGGTTACAC  
ACAAGACGACACGTCAGAT  
>locus0667  
AGATAGAGAAAGCGGACTCGTAGCCGAGGTTGAGCGGCACTGTAGAACATAAATTCGCGCCAGCTGAGCTCTCAAAA  
TGGCTGCTCAGCTATTTACTTTCGGGGAGCAAGAGAGAGCGAGCGAACGGGGAGGGAGAGAGGATGATAGCAATA  
TATATATATATATAGAGA  
>locus0668  
CTCTCGACCTACACTTTCAGTTTACGTTTACGTTTACGTTTACGTTTACGTTTACGTTTACGTTTACGTTTACGTTT  
ACATATGCACACCGCTTTCACACTGTACACGACACGCTCCACGAGTATCTCTCGCGCTGCTTACGAATTTATCA  
TTTTTTCTGTTTACGTTT  
>locus0669  
CGAGCGATTGCGCAACTTTTTTTTTTGTCTTAAAGACTGCGAGGGAGCGTTCAAACGACACAAATACAAGATAGT  
ACTGACATTGGATAGACTGAAGGCATTTAGTAGTAACTTAAAAAGCGAACCATCCGTTTCTGCTCTGCGGAGCCATT  
TTAATTTACATTTGTTGCC  
>locus0670  
AGGGCGCGCGCGCGCGCGAGGGTTTATAGATAGCGGCGACGTGGCTAGAAACCATGCCACTCGGTGTTTTGACCCCT  
TCGCCTAGCTACCGCTTTCGGGCCATTGCAACACGACGACGACGCGCGCTCGGCGACGCGACCGCTGCTGCTTTATAA  
AGCTTCGTTCTAATCTATGG  
>locus0671  
GGCAGCGCTCGCTGCAGAAAGAGAAAGAGAGAGAGAGAGACTCGACTCGCGCGCGCATATACGACCTTCTCTA  
TGGAAAGGATGGATCGAATAGCAACGACCCGATATAGGTCAGCGTGCATTTGTCGCGGACCCCTTTCACGACGAGGG  
GGTTTTACGCTCGAAATA  
>locus0672  
GGGTCTGGGGCCCTTCAACACTACTGTATAACGCTGGGTGGGGCTCTGTGGTGGTCTGATGCGCCCATGCCGCAT  
TGCTGTATCTACAGTCAACACAGAGAGCGCGCGGTGGGATCAAGCAGAGTCAGCTCTCTGTGAGCTCCACATTTG  
CAAGTTGATATACCAAAAAATAATTCGTAATAATGATGCTTGAATTCGATGTTGACTTT  
>locus0673  
AATACTTGTCTCGAGGTAGCAATGCATAAATAATTTATGTAACGATACGATATGCAACCCATAATATGAGGTCAT  
GTTGATTTGTTTAAATAAATGTAAGTTTGAATAATCCGAAGACGAGTATTCATTTTTTACTATTGATAGAAAGCTT  
TGTTTTGTTTTCTCGGCC  
>locus0674  
CGGCACAAGTACAGAGAGATATAAGCAGTACCGAGAGCGGACGACTCAGGACTCCGCGGCATGCCAGACACCGGGACC  
TGTGCTGTGAGTTTACCGTGTTTTTACGAGCGACTTACAGTCCGCGCGCCCAAGTATGCTATACAGACACACAC  
GCGCACCAACGTCACGCT  
>locus0675  
CGTGTGTTTGTGAGTGTGATTTACAGTACCACAAGCAGAGCGGCTGTACAAGAACACACTAAAGTACATGAACAT  
GTGCTTACGCGGATGTTCCAGCTGAGTGCATTAAGAGTCCGCGCGTTCGCGCTCAGGTTAAGAGTCCATACCCCTC  
AAGAAAAACCTAAGCTCCT  
>locus0676  
GGTCCCATACAAAAATTTTCGATTTGAAATGTCATATTTCTACATAGTCTACTTCATGCTTTCCTTCTCTGTCAA  
CATCTCGTGGCCTGATTTATCATCACTTTCCAGGAGCAAGCGAAGCCGAGCTACAGGATGGGAAATGATAAAAATC  
AGGTGAACGCACACGCCGA  
>locus0677  
CATAGAGCCAAAAACAAAAAGAGAAAAAGTACACCTCAAAAACGTTCAAAATATACTGTCGATTTTCATTTTCGAGTT  
GTTGGTTTGTGACGCGCGCTGTTACACACCCACCCCTCAACCCCATTCATGGTAAGCATTCTTTTTTATTTATTTCAA  
ACTACTCGTTTTTTATACGT  
>locus0678  
GCGCATTCAGTGTGTGAGAGAGAGAGAGAGCTCAACGCGCGGTGCTATGAAAGCGGCTCCGCTTTTCTGAATATAT  
TCCAAATAAAAAGTCCGAGCTCGTTTACACTCCGCGCTTACTCTCTCTCTCTCTCTCCCGCAACCTCTCTCTTTT  
TCACCCCTCCACCTTGGC  
>locus0679  
GCGCAACGAGCGAGCGAGCGGGAGAGAGAGAAATGGAGAAACGAAAGATGTAGCGCGCATAGCGCGAAGATGAA  
GAAGCAATTTCTAATGGAGGCTTTGGGAGGATTTGGCGGAGCAAGTGAAGTATCCATGAATAATACCCGCGCTTC  
CCTACGCTCGCGCGTTGT  
>locus0680  
CGCATCGCATCGCTCGCCCATCCGCGGTAGTCTTCTCTCGATCCGCGCTTAGACTTTCCATGCGCGCAATCTCC  
TCTCAAAATAAATAAATTTTGAATCGCGCCACCGCCACTTTCCGATTTCCCTCTCTCTCTCTCTCTCTCTCTCTCT  
AAGAGACTTTGTGTGCTCCG  
>locus0681  
TAATTTGCTTACGCAAAATTTAGCATCGAAGAGAGGGTGGTAGCAGCAGCAGCAGCAGCAGGAGGCATTGATTCGGC  
GGCAATTAAGCTCGGATTTACTGATAGGCTTTGGGAGGGGAAGAGGGGCTACGCTGTCGGACTTAATGGATACAC  
ATAGCTGAGATTACTGCGGC  
>locus0682  
ATACAGTAGATCGGGAGCGCGCTCGAATAAATAAGTGAATAAATAATCCGCGCGGATTTCTCATCTAGCATTAGCGAT  
TCTTTGAGCGAGTAAAGAGAAATTTAAATATTTCTACAGAGAGCGAGCGGAGTACCGGAGTTTCCAAGTCAATTA  
CCAGATTCAGTCTGCTGCTC  
>locus0683  
TGCAAGTAAAGAAAGGAGTAAACAGGTGCCGTTTGAAGACGAAGAAAGCTGGAATAATACATCGGAGACCGGTTGGCGA  
CGCTATTCTGGGGAAATAACACACATACCGCGTGTATTGCTTGAAGATACAGTAAAGTTCGCTGCTGATCTCTGCA  
ATGAAATTAACCTCGCTCGTCAACACGCTGATGATTTCTATGTAAGTGTATGTGCGAGC  
>locus0684  
TCCTCAATGGAGAGCAGTCCAGGTTAAAAAAGAGAGCGAGAGACCGAGTCAACAATAACAGAGAAAGCTCCATTGTC  
GAATGCTTTTAAATTTGAAATACAACCCCTGCTCATTTCCGCGCTTTCCATTTCTATCTCTCTCTCTCTCTCTCTCT  
CTAATCTAGCGCTCACTGA  
>locus0685  
GCAGCAGCAGTGTGCGAGGAGAGCGCGCGCGCGGAGGATTTACCTGGAATTACGTTCAATCTACCATTGGCGCTGACT  
AACTAATAATTAATACTTTTAACTGATTTAGCAGCGAGCAGCAGCGGTTGCTGCTGCTGCTGCTGCTTACCCCTCAGCTA  
CCCTCCCTCTCTCGCCCCG  
>locus0686

```
CGCGAGCTTCTGCGCGCGGAGAGTGTAGCACACC GCGGGAGGTCCTAGGCACTACTGAACTCGGGCCCCATGGCAAACC
TTGTTAACGGCAGTCGACAACTTAAACTTTGGTAAACAATCCCCCTACCGAACTACCTCTGCCAAACTCGCTCTC
ACTCTCCGAGACTATGCAT
>locus0687
AGAGAAAGCGAGGGGAACGCCAGGAGAGAGAGAGAGAGAGAAAGAGAGAGAGGGAGCCAGTGAAGTCTGTAAATTTTCTTACA
TTTTATGAGCCATCAGAAATTCATAACCTCGAGCCAGTCCGTGTGGTACTTTGCACAAGAAAAGTTTCTCGGCTCCGACG
TAGCTCTCTCGTGTGCTT
>locus0688
GACTGAGTATGCGGCGGAGGAGGAGAGAGAGAGAAAGAGGAGCCGCTGAGGGAGAGGGAAGGGCCGCTTAATTAGAG
CCAGACTTCCGTAGGATGCTTGGGCTTCCCTGACGCGGTGCTCTAAACTTCGCTCCCTCTCCGCGGAGGGCGGTTAT
CTACGCGGGTAAAGTGGC
>locus0689
CTCGCTCTCTCGCTCCGGCAGAAATCGCTCTCTCTTTTAGACTTCGAAATTAATTAACATTTGGGTTCTCCATTAG
TGTAATTAAGTCCATTCATAATCTAGGAGGTGGAGAGGGCCACCTTATCTTCAGACTTCAGCCCTCTAGCTTTC
TCTCTCTCTCTCTCTCT
>locus0690
ACAAAGCCGAGAGCAAAGAGAGAGACCAGAGAGAGAGAGAGAGCGCTCGAGGGCAAGCCCTGAGAGCCAGTTCATTTCTCAAACCT
GTCCAAATCCGTGTGATGCAAAATCAATCACGAGCTCCCTCCCTCCCTTCCCTCCCTGACCCCTGGCACCCGCTGGC
CCTTGTCTCCGACGGCGC
>locus0691
GGCAGAAAGAGAGAGAAAGAGAGAAAGTCCACGGCAGCAGCTTGAATTTGCATAACGTTCCGCTCGTGTGCGTGA
TGCCCTCGATATCACTGTTTTATTTCCGCTCGTCTCGCCCAAGCTACTGTACACCACCTACGCTCGGAAAATTTATCT
CACTTCAGCTCTCGATCGG
>locus0692
GGTATTTATCCCGCTCGCGAGGAATGACACGAGAGTAAGGGGGAGAGAGAGTGGCTGACGACGCTAAGAGCATTAAA
GAGACGTTTCCGCCCGACACTTAGGTTTTCGCTCCATAGATACTCGGCCTATCGGCTTAGCAGCTTCCACCCGCGGGT
GGTCTCTTCCGAAACTGTC
>locus0693
TTTTTCTCTGCTCACTCTTCTTCCGCTAGCCCGCGGGCCCGCTCGATTTATATCGAACCGCTCGTAAATCG
CGCAAAGTACGGAAACAGAAATCAATTCCTCTCCCGACAGCAGCAGCATCGAGTAAATGGCCCGCTGGGCGGA
ATCTTGGCAACTTCCACCC
>locus0694
TGATACCGGCACAAGCGAGATGGAGATTCGACGGAGGTAAAAGGCAGAGATTTAAATGCCCTCGCGCAAAAGCATTAA
GCTATTCGCCGTGGCAACGACCATGGCGAAATGGCGCCAGAACTACTTTAAACAGATTCCCTTTGCCGGTCTCTCT
CTCTCTCTCTCTCTCTCTCT
>locus0695
GGGAGCGAGCGAGGAGTACTCTCTCTTCTCTGTGCTCTCCCTCTCTCGGCCCTCTCTCGGTAACGAGAGGAGAA
ACACCCTCGCTACTTTAATCGACCCGCGCTTCTTGCTGCTATACATACACCAGCGCTCTCGCCACCCCTCGCGC
AGCTCATATATACGCGGGTG
>locus0696
TTTACCTTTATCGTTAATATGTAGCTTTTTTTTTTTTTTTTATTTATCGTAGATTGTCAGTGGCTATCCCTGATGTT
AGTTACCCCTCGCTTCGCTGTGGTGTGCGAAATATTGTTGTCGAGATTCTGGTCTATAATGCGATTACAAAGCAGATCT
CCAAAGCGCCCGGGCTCG
>locus0697
CGCCGTGATGATGATGATGATGATGACCGAGGACAGCGCCCGCCCTCGTGCACCCAGCCACAGGCTTCTCTCTCC
GACGAGGGCATCACTGCCACAAACCATCTGCAATCGGAACGTGCTCGGTTTTTAGATTTGCTGCATGTAGTTATAGGTTT
GTAAAGGATCAACAGTCTCT
>locus0698
ACGTGATGTTGGTGTGTTGAAAGGAAATGATGGTTGGGGTGTGGGATGAGGAAAGGGGGTTCGGTTGACGAGGGAGAC
AACACCCGCAATACCGTCCGAGCTGCTGCCACCTGAGCCTGCGACGAGACTGCTCTCTTTCCCGATGGCGTCTCGCG
CCGTCTCGATGTCGGCTC
>locus0699
AAACGGCAGGTAGGCAACCGAGAGGAAATCTGTATAGAGAGGGGGGGAGAGGGGAAAGGATGAACCGTACGAACT
GGGGCTAATTTGTCGGGAGATTTGCTCTCGGCCCGCTGCTGCTGTGCTAACTCTCTCGAGAAAACCTGCTTTGAGG
GACTGCTACTTTTCTCTCTCT
>locus0700
CTACCTCCAGCTCCCCCCCCCTACCGGCTCGGTATCTCTCTCGGCCGATCTCTCGAGAGGTTTAGGCACTCGCGC
CAAACAGTTTTAAATGCGCTTTAAATTTCCCGGACGCGCTGCTGCGCACGAGAGACCGTAAAGCATCTCGCCGGCG
GCGGGCAGGCTCTCCAGA
>locus0701
GGTTATCCTGGTGTGGCTCACAGGAAACAAAGAGGGCCGAGGAGGAGGGGCGGCTCACAATGGCACAGT
TAGGTTACAAAGCTTTTGAACGAGTTGCCAAAGTTTCGAGGCGCGGCGAGCATCGTAGACCGGACTGTGCGGGCGGCGGG
GCGGCCCTTTGTAGCTGCTGG
>locus0702
TCAGGGTATTACATCAGACACCCCGTCTGCTACGAGCTGTGCGCAAGTATGGAGTGGTGGCAGTGAACAGGTTGCCCT
TGCCGGCTCGTCTCGAGAGCTCCGGGAGCACATCGTCCGAGATACGCAAGTACGCTCTCTCTCTCTCTCGCGGTA
TTTTAAATATATTACTCTCTCT
>locus0703
GTATAGAGAGAAAGAGAAAGAGAGAAAGAAAAAATAGAAAAAGAAATAAACGACTGAATATATGTGCTCTTTACCAGGGGA
CGACTTACGATATCATCAATAGAAACATACCATCTTGACGGCTTGGTTGGGTTCGACTTAGCTTATCTAAAGATGTATA
GATTGAAGAGGAAAGAGAGA
>locus0704
ATCTCGGCTCGAAAATACAGTAGCAGCAGTGGCAGCATAACGTTTGTATTATGCTAAGCCGATCAACAAGTGTATT
ATTATCATTCAAATAAATGTTTTAATCTGCATACGCTTTATCGACCCCTTCCCCTCTTTCTGTCTCGCGAATGTGACG
CAGCAGCAGCGTCGCGCGG
>locus0705
GCTATTAAGCTAATAATATATACACCAGCAAAATACGAGTCTTTTAAATCATGTTTGATCTTTATTTATTGGATATTGC
AGAAATTTGTTGGTTGCTGAATCTTGCACGACTTTTGAATGTGTGGAACCTTGATATATATACATATATTATACATATT
CATGTACCACTGTACTCATTTGATAAAATACACATTCAACCGCTGCAACAACACTCTCCGCTCAATCTCTTGAATCAAA
TAAATTTTGTGCTGGTTAAAGAAACGTACCA
>locus0706
GCCCTTTCTCTAACGCACGGCAGCTACGGCAGCACAAACACCGCTTGAGAGCAGTTCAGCCAAACCCATAATTAGAGG
CTTTTGCAAATTTATGCGCGAAGCTGCTGCCCTTGGTAAAATATCGGCTTAATAATAACAGTTCGCGAGCGAGCACAC
CACGCAATTTATCGGAGCGG
>locus0707
GAGAGATACTTGTCTAGTCAATGGGGGAGGACGAGAGCGAGCAACCGCTGCGCGGATAACGGCCGCTGTCTAAAC
ACACTTTAAAGATTGAAAACGTAATGGCGGGGGCTTAAACGAGATTGCTGTCACGGCCGCAATCATATATCTGGA
TTAGCGGAGCGAGACTAC
>locus0708
GAGTGAAGAAAGAGAGGAGAGAGAGAGAGAGAGGCAAGCGATCGATCCCCTACACCCCTCCCAACGGCCGCTATGCGG
GCGCATGCAAAATCAGCATGCGCCGAGACGCCCGCTACTGCTCTCTCCACCCCTCTGGCGTACCCCTCACTTCTCTCT
ACTACCCCTTTCTCTCCCTC
>locus0709
CTTCAAGTCGGGAGGAGGTCGAGAGGTTGAGGGAGAGAGAGAGAGAGAGAGAGGAAACCGCGGGGTAACATCATCG
CTTATGGATACTGACTCGGCAATGAACCTCGACAGCTTCTGTACGAGGGAGCGCACTGTATATAGCCCGAGGGCG
TCTCTGCTCTCTGACTT
>locus0710
GCGCGCGCGCGGAGCGGTGGTCTGTGCTATCTTGGCTTTTTCTACTGCGAGAGTAGGAGCCGCGGGTAAATGATCA
TTACCTCCGGTATAGTGACAAGTAGAGCGCGCGGCCCGCTCTGAGGAAATGGCCGAGATAAGGCTGTACATTT
ATTTTATATTATGACGAAT
>locus0711
GTAAGCGCGCCGACGCCACCCCGGGTAGGGGTAGCCGAGCTCCGTCGCCGAGTCTTCTGCTCATCTGCAAGTGTATAAC
CGAGCTAATTTAAAGTAAATAGGCCATCTGTATGGAAGCGCGGAGCCTGCGAGCGAGCGGAAAGAACAGGAGGTTAG
```

```
ATAGTGTGTGCGAGGGAGC
>locus0712
GAGGACGAGGACGGGGGAAAGGACACAGAATGCGCGCCGGTACGCTGGCAGTGCAGCTCTAAAGGATATGCACGC
GGATTTAACTGATGAATCAACATTTGCTCTTGTATTCGCGCCGGCTTAATTTTCCTCGCTCAGCTGGCTGCGCTATAT
ACACAAGCGCGACCTTTC
>locus0713
TCCCTTGATTCCCTAGACCCGAAAAGCAAATAACAACAACAACGAAACCTTGCTCTCTACACGAGTTGAAAACCGATCCTG
TCTTTGTTCGAGATGGACATGAAGTCTGTGCGATCGCTACTACTACGAGAATTTGTAAGTGCAGACTAAACATAGAATCA
TACTTCCCGCCACCTCATAT
>locus0714
CGCAGTCTCGGCCAACGCGTACC CGGAGGACTCCAGAACGCAATATGGCGAGCATTGAGCTCGGCAAGAAGCGGATGC
GCGACTCCAATGATGATCTGCTAATGGTACCACGGCTTTGCGATGATTACGCTTTTTTTCATTTTTATTTCTTTCTTCC
AAAAAGAGAAGATGGGTCA
>locus0715
GTACATCGATAAGAGCCGCGCTCGCGCGCAACCGAGGAAACTCTCGCGCGGGCGGCTTTTCAGCGTCAGAAAAATCTC
AAATAAATCCTTTTCGTAATCCCGCATCGCTCGCTTTCAGGCGGAGCCGATTTACAGCACTCGCTTTCAGTGTGTG
CGGCTTCTTTCGAGCCGA
>locus0716
GGGAACCTAGCCCCGAGTTCAACGCTCTCCGCTCGGCTGGCTTCGGCCGTAGCGGCTCGGCCAAGCTCGGCACTAGGT
CAGTGATGGAGTCACTGGCCGCCCCGAGCGCCGAGCAATGACACCGACGACGACTATACGCGGAGAGAGAGAGAG
AGAGAGAGAGAGAGCCT
>locus0717
AGGGAGGGAGCGAGAGGGAGATAGCGCCGCTGGCCGGCCCGCCGAGCCTCGCCGGCTGGCTGGCCGTCAGTTTAGT
TACCGCACACATAAAGGCATGCGCTGTAGATACCGTTAAACCCGCAATATTATTATCTCTCATTTTATAATAATATC
TTTCCGTTCAAGTTCGCGCTT
>locus0718
TTAATTTCCGTAAGCCGACAGGAGTTAATAGTGTGATCATTTTTCAACGCTGCACAAATAGGGTTAATCTCGCTCGAC
GAGCTAATATTTCGAGAGTTAACAAGATTTCAAATGCGGCCAGGCGCCGCTCGCCGTCGCCCAACCCCTCTTTTGCT
CTCCCGCCGTTATACACGAC
>locus0719
CTCTCTCTCTCTCTTGGAGAAATATAGTGTAAATAGCGGTGAATGGCGAGAGAGGGGGATACAACATCCCGCTTCTAT
TAATTCAGCTTACCCATAAATCGAAATGTCAGAAATGAGCGAGGCGCCCTCCGAAATTTGGAAACTCCATTACGAA
GGGAGAAGAGAGAGAGCGAA
>locus0720
GAGGCGGAGGAGGAGGAGGTAGCTTCTCGTGGCTCTCTGTGGTGGCCCTGCGCACAGGGGGGGTGGTATTAAATGG
CTTACGAGCGACACTCATTAGCACTTTGAGTATACGAGGGACACGCGACGAAACCCGACCCGCTGTATCTCTCCG
GCCAGCCGAGCTGAGAGAAA
>locus0721
ACAGCACACACACACATGGGGCAAAACCGAGCTAGCAGCGCGGCTGCCGAGTCTGTTGGGTTGTATTATCTAGTT
TATACGAGCTACATAGACATGAATGGCATCTACTCTGCGCGCTTGAATGAGAGCAATTTAAACTCTTTAGGGTGTCTTA
ATCGGGTAGGAAGTCAATC
>locus0722
CTTATTTACTCTTTTCGAAACTACTGTGCGGCATCGCCCTCGAAAAACAAGTACGACCCCGGGAAGCGAGAATTAACCCAC
TGATGTTAATAATCCTCTCGTGTACGCGCTCACACACACACACACGCTGGATTCCTTTTTTGGCCGCCATATGCAC
ACTTCCAGTTCGCGCTCAG
>locus0723
TATTACAAGCCAAGTACTCTGTTCTGTGGGTTACAGCACCTGTACACCATCACAGAGTCCCTCGGATCGCACTATAGGAAT
CCCTCAGGCAAGCTGTTATCAACCGTTATTAGAGTTTGGCCACACAGTTTTTTTTTCTTTCTCTCTCTTTTAAATAT
TTATTTATCTGTACATGCG
>locus0724
TTTACTAATGCCGTAATGTTACTTTGCCCATATTATAGTAGAAGCAGCTCCAGACGGTACTAGAAAATTAATTCGG
TTTAAATGCACTCCCTGGTATGCAATTCGCGCCGAGCTCTGGCCCTTTCTTTGCTCTCTTTCTCTCTCTCTCTCT
GTCTCAGCCAGCTCCCGCC
>locus0725
GACTTTTTGGGGACTACTGTACGACCGCGAGTCCAAGTGGTAAGTACGGTAATGGACATAGTTTGGCGGTAATGTCGGA
GACTAATTCCTGTTATTTCAATTAACCTCCCAACAGCAGCAGCAGCAGCGGCGAGTCCCGAGGGTCTGAGGCTCGAG
GGAGAGGTCGGCTAGTCGAG
>locus0726
TGCTCGTTTTATTTTCTCGCATCTTCTCAGTTTCTGTTCTGCTCCCGCTCCTCCGCTTGGCCGTCTTAACTCCTGTTA
TCCTGTTACAATGAGATGATACGACTGTTCTGCTCCGCGCGCGCTCCGAGAGGGAGTCCGAGAGGATTTAATTAATTA
GCCCTGAACGTTGCGTCTCT
>locus0727
CAGGCGCGGAGAACATCTTCCGCGACGCGCGAGCTGTGGCCAGCTTGTGGGTGAGGACGTCATCGCCAGGGCGGG
CATGCTGACGTAGGCTTTCGCCAGTGGATGCACTTCTTGGCCGACTGCGAGTFCGAGGCTCCGCTGGGCTGCTGTTGCC
GCGACAGGTTFCGACGAGGTCGCTACTGCTTCCCGCACTCGGTGACAGTGAACCTTGGCCGCTGGGCTGCCGCGCGCC
TCCTTCTCAGGACCGCGCGCTT
>locus0728
ATCTTGTGCGGCTCATACATTAATTAATTTACTCGCTGACTATTGACTGGACTCTGTCTGTTCTCTGTGTA
GATGGTCAGGCTGACGCTCTCTTTACCCTGTTGGTACGCTTCCACATTTATATTAATTAATTAATTAATTAATTAAT
ATTATATTTACACTCACATT
>locus0729
ATATTCGATGCCCCCTTTCGATAAAAAATACGACAAGTATTTAAAGCTGAATGTACGAGACTGGACCCAGGTGTGAGC
CCTGTGCGGAAACCAATCAAGTCGACACTGTCACCTGGACGTAAGTACGATATGTTGTAATTTTTTTTT
TTATTTAAAATCCTCCCTT
>locus0730
ACAAAAAATTTATCGGCGCTCAGCGCGACTCAGTGAATTTAAACCTTCAATTTAGGTCCTCCCGTCGAGGTGGGGGT
CACCATGTACGCTTTCAGTATCAGCTCGCTATCAGAAGTCAAAATGGTACTATTACTTAGGCTTACGAAAGTTATTCGG
TCAAAATATTATATTATATT
>locus0731
GTGGCCGAGCGGAGATTACCGACCGCGAGCGTAATTAACGAGCGAGCGAGCGAGGAGTGGGGTCTCTGTTTAA
TCTGCAATTAATGTTTCAAATGCCATAAAGCCTATGGGTTGCTCTGGCTACGTAACAGATGCCACTTATCAATGCGCAC
ACCGCTCTGCTCTCGCTC
>locus0732
TCGCTCGAAGGTTTTTCGACCAAAAGCTGGCGATTTTCGGGGCTGAGGAGACTCGGAAAACCTACCACGACACAGCAC
AGCACTGACGACATGCCCGCATGTTGAATGTCAACATTCAGCACTCGCACACTAGTTTTGTCTCCCTCCATCCGCGGTT
TCGCGATGTTGCCATGTGTT
>locus0733
TGTGTCGATGGCTTTGTCAGCCACCCAGATATATATACTTATACTTAGAAAATTTAGTCTTTTCAATTTAATTAAGTGT
TAACATAGATATCACAGAAATGGTTCTTGGTACCTTATATCTTCGTTATTTATTATTACGACTTTACGAGAACTTGACA
AAGAGGAAAGAGCTCTCTT
>locus0734
GATATTTCCCGCAGCTGTCCCAAAAGTTTTTCTTACACAAATTCGCAACCAATAACTGATTTGTGATAAAGTAAAAGA
CAACGAGTCCAGGTTTCATGTTCCATGAATCCGACCTCGAAAGCTTCAACAGGTTTGAAGCTTCTTCGCTGTCACGGA
ATCCTCGCGCCGCTCCTT
>locus0735
GGAAGACCGCGCTAACGGGTTGGCTGCTGCGCTGACGAGAGAGAGAGAGAGGAGGTCGCTCCGCTCCAGCTGCC
GGCTAATCAGGAATATCATTAACCTCTCGAGTCTGAGAGAGGAGAGAGGAAAGTTCGCGACTCGATATCTCTGC
CGCAGGCCGCTCTCTCT
>locus0736
AAGAGATGAGAGGGAAGGAAAAAGCTTAGTGTAAAGATTTAAACGGTAGAAGTTAAGAGGTTAGGCTTAAAGGCTGAAC
CACGTATACGTATGTCTCGCGCACGACCACTGTGATAACTCGGTGGCGGCTGCCAGCCTCTACTTACATAAATAATA
ATTGTACTTTGAAAATGA
>locus0737
```



TTGCCTGGCGAGTTGACATGTCGACTGCCTGTGTTGATCACTTGAAGTGCCAAAGTCCCTCTGCCTTCTCGCCCCAGAA  
GTGCACGCTGAGGAAGGGCCAGTCTGTCGAAGTTGGAGTTGAGCAGCTCGCGGGCTCTCGAACAGCAGCTCGACGTGG  
TCCCATCGCGGAAGTC  
>locus0763  
ATTCCGGCTGTGGAGCTCGCTGGTAAATTTATGCGCGCAATAGGCGCCTCTGCGCGCACAGGCCTCCAAATTAATTGGG  
AAGATGTTAGTAAAAGTTAATTTGGTAGTGGCCGCCAGAGGAGGATGAGGACGCTCGTTTGGCTCAGGTGGTGTGTGCC  
GAAAACCTCGTGGGATA  
>locus0764  
TTTGTACTGATGCAGTTGACCCCGGCTCGAGTACAGGCCAGCCGCGTCCCGAGGCAAGGACGACGCTCTGACT  
GTTGCTGTGTAGCGCCCTACCCAGCGGCTACTCTACATCTAAGCGCGATACCTGCATAAAGGTCGCGCCAAAGTACG  
GACGTGCAATCTTTGTG  
>locus0765  
TTTGTCCGACCTGAACGTGACATGATAGGAAGCCGCCGATCTCGAGCTGGAGGACTGTTCAAGCGGCACTTCACCAC  
CGTGGAGTTCTTTCCAGGGGACCATCATGAATCCAATCGATCTGCAGCGGGTCAAGGTGAGTCTCACGATCAGAGTCCCA  
CTGAAGACACGATCGCA  
>locus0766  
ATTTCCGGCTGTGCTTTATGTTACAGCGAGGAGGTGGAGCGTTGCCAGAAGTGGAGCAACACATTACTCAGCAGATAGAC  
TTAGCTTTCAATATAATTTTTTATGCTACTTTTTTATACGCGTAAGTATACATTTTATGCGCCGAGGAACCCCTGTGAG  
CCTCCCGTGTACTTTAC  
>locus0767  
GAGTTTCAGTCAATTTTCAAAATGCAAAAGCCAGCGCAGTGCAGGTTGTTCTGTTTGTTTAAAAAATTTATGGAACCAG  
TGTGACCAAGATGGTTGCTATGGAAGAGTTCATCCGGAGTTGACCGGGTGTCTGTTTATGATCTAGCTCGAGGACTCAA  
TTATAAAAAAATATTAT  
>locus0768  
CCTAACTTGCCGATCAATGAAATGTGTGAAAACAATCGTTACAGGAAAAGAAGGATAAAGAGAAAACGCATAGCCTTCTA  
ACTACAGCAGTCCAATCACACCAGATCAAGTGGTGGTACTTACTAACACTGGCAGAGGCTAATCCTGAACAACATAGAGT  
GTTGAAAGAACGAAAA  
>locus0769  
GGTGGATCACTTCAACCGGCTACTGGATCAGTACCCCTGATGCGCCGTACCATGGAGAGCGTTCGCCCGGAGAGGTATA  
AGCTTTGGTTAGGTTTCTTCTATCGAGTTGGTGTGCTATAAAAAACAAGCAACTAGATGTCGATCGCTACCCTTCTCCC  
CCCATTTGTTATTATATA  
>locus0770  
CAAGTGTGTAGTAAAGAGCGAGGAGCTCTGTTTATTTCAGTCGGCATCAATAAACAGAGTTTAAACACACAATGAAAG  
ACGCTTAAACAAGAGCTAACCGGAGATTGAGAGGCTCCGCCAGCGCGGCTCGGCCGGGCCGAATCGCAGCGACCTATG  
AGTGCCTCCGACTCGG  
>locus0771  
GAATAGTTGAAAGGATGATGGAGGAGCATAAATGAGGGCCGATTCAGCTAGACCAACAGCGCTTTTGTATATAC  
TAACGATATTTTATATAGAGTATATAGTTAGAGAAATGAAAGTGTGCTAGTGTGCGGAGAGAAGAACGGATGTAAGA  
AGACACGACTGGGGTCT  
>locus0772  
CCATCGAATCGACTGGAGGGTTAATTTCTGGTCAGTTGGTGGCTTCTGGCTTATACAGCGAGTGGAGAGATAGCCGTA  
TATACGGCGATCTCGAGGCGCGCGTAAACAACCCCTACTTTACCCCTACATAAATATCCGGAATTAGCCATTTCTCCT  
GTCTCCCTCTGCTCTCTTTCTCGAGAGCGCCGCTCTCACTGTACTCGCCGTTTTCTC  
>locus0773  
CGGAAGCGTTGGGCTCGCCCTGATGTCGCTTAAACCGGCTACAGGTTGCTGCTGCCCCGGGGTCTGCTGCCAAGACC  
ACCCGCTGCCTGTATTCGACCAAGGTAGGCTACCAGCCATCTTCAATTATGCGCGTGTGCAACGAGCTACTTTCTTAT  
GTGAGCTCTTTTTTTT  
>locus0774  
AGTGGTGTGATGCACTTTTGTGCGCCTCTTCTCTCAATGTCGATTTCTCTTTAGCAGTTTCTTTACAACATC  
TATACACTTATTTATATGGGATTTGTGCTGCTCTATCGCTTCTGCTGATTCGTTATCTGGTGCCTCAGCTCCTCTGCGG  
TCTGTAGGAACGCAAAA  
>locus0775  
TTTGTCTCGACTCTTCATCTTTTTTTTAAACAACATATTATCAGTCAACCCACTGTTCTTTTCGATACAAGGAACGATAAT  
ACAATTTGAATTTTACGAACAACAATTTTTGTCTTTTGTCTGTTGAATAAAGGTTGAGACCAACTCTGCGATGTT  
CCAGAAAGACGCAATTT  
>locus0776  
GGAAAACCTCAAGTCTCGCCGGAGGACTTTTTTCGAGTCCCGGAATACGCCCATCTCGCCGGGATCCTTAATAATACA  
GAGGCACTAATCCCTGATCACATATCTCAGGGATGAAAGTAATCTCTTTCTCTTTCTGCGCCGAGCGGAGAGC  
CGAGAGACGGAGAAGA  
>locus0777  
CACGATCTGTACAGAAGAGGAGGAGATTGCTCCGGGGCGTGTACCGGGGTCGAGACGTCGAGAGCATATTGAAT  
AATCTGCTCGCTGGACCGGAAAAATATCTGGCAGACGCCCTCCTGCGCGAGCTAGTTCTCTCTCTGAGCGATGAGTC  
CCGGATCGACCTTCTTG  
>locus0778  
AGAAGTGTGCGTTTACGTCGACTGTATGTGAATATGTATATAAATAGTGCAGCAGATGTTTGTGATCCAGCTA  
TGACAGGCACTTCCGTTCCGTCGAGCGTGGCTCTTCTGACTTTGCGCGGATATGCGCGGAGTAGTTTCTGTTTCT  
GGACGATGATGTGTG  
>locus0779  
AACCGAGAGGGCAGATGACGCTCTCGGAGTATATAGTGGAGGAGTGGTGGCGGGTCCGCCGCGCTCAACCATGG  
CCTCATTACCAAGCAAAATTTTATAGTCAACTCGGAATGCGCAGAGTAGGAGGAAGACGGTAAAAAGGAGGGAGC  
ATAAAGCGAGCAGTCT  
>locus0780  
GGATAAAGAGGGAGCATAACCGCGCTCAGATAGCGGCTCCTCGTAAACGTAATGCAAGACATATCCAGTGTGAAATA  
TTTCACTTAATCCAGCAATATCAATAAAGACAGTCTCGTCCGTCGAGGACCGAGTTTCCGCTGCCAAAGTCTGATAC  
CAGGCATTAGAGCTGT  
>locus0781  
TCAGATGTCGCTCAAAAATTTTCCCGAGCAAAAGCTCATTGCGGACTGCTCGCCGAAAAGCCAGTAATTAACA  
ATTTGCCTACAGATGGAGTTTTAGCCGGGTATTTTCATTGCGCATTTATCGCTCGCCGAGCAGCTATAATCGCATA  
GCTCCTGATATATAA  
>locus0782  
TTCCGAGTGGGGCCGGGGTCCAAATAAAAACAATAATGGCGAAACATAAACGTTGAGCGCGGGCAGCACTTAACAC  
TTGGCACTTAAACAACCTGGCAAATGCTCCCTGTCTGAGGGGCTGCGCAGCTGAACGAAATGCCCGAACGATGACG  
ACGGCATGCCCGAGAGC  
>locus0783  
ATAAATGAACCTGTAACATACATAGAGTCTTACAGGAAGATTTGTACAAAACAAATCCGTCGCCGGGGGCTCCGTTA  
TCCGGGGCGCGCGGCAAGTCTGTGATTTAGCTTGGTAAATCAGTATTTTTTAAAAATAACAACAAAAACGAAAAA  
AATCGAGAACGAAATCAACCGGATGAAACGTAATTAACAACGAAAA  
>locus0784  
CTCTCTTCTCTCTGCTGGCATCGCTCGGATCGTAGAGTCTGTGACCCGCTTGTCAAGGAGTGTAAAGTCTCGGCA  
CCCTCGGCTAAAAAATGATCCGATATCTCGCTGTGTTAGCCCCGAATCCCAAGGACTGAAAAGGACAATCGCGGAG  
AGAAAAGGAGGAGAGC  
>locus0785  
GAGCAGCCCGCCCTCGTGGATATAAGGGTCAAGCCAGCCGCTGCGGTTTACGATCGCCCGGAAATCACTGGCAGC  
TGATAAATAAATACTGGGCTTTCCAGTCAATAGCTCGGCCCTGTTACTAGCACTGGCCAGTTTGGCCCGTAGTT  
TATGCGCCGCTCGTTGT  
>locus0786  
AATAAATCGGATGACATTAGTCAACGAGTAAATTCAGCGTTGTAACGTTTACAATATTAATAACTATATAAAGTGA  
AAAAATCTGTACAATGAAGACATCGGGTAGCGGAGAGATGCCCTGCCCCGTGTGACCATCTAGACATATCGCTTTT  
CTCCCTTTATTTATCG  
>locus0787  
TATCCATGCCCTATAACACCGCGCGCTGAGACGGCAACGTAATTTACGGGAGGGGGCAGTAAAAGTTTTGCGCGA  
AAAGCGAAAACCTCTCGTAATGGCTGTTTTCTTGGCAGGAATACTTTAAAAAGGTGAAATAAAAAATGAAAAAGTTTCT  
TCTCCGCTCCCGCGG

>locus0788  
TAAAGTTTCGGAGCGGAGTAGGAGGGAGAGCGCTAGCTCCGCGGTCCAAGAATAAGAAACCGTGAGCATACATAAAACA  
GGAGGTTGGGGATGACAGCAATTAAACCGTAGCCCGGAATCCCTCCCGGAGGAGCGGTAGAGCGGCCCTCTGTATTACG  
AATTCTCTCCCGCTTT  
>locus0789  
AGAGGAGCGCGAAGAGGATGAGTGGAGGATGAGAGAAAAATAGCCTCCCTGGCCCGGGCGGTATACAGAAGTGAT  
AATTTCTGATTGAATATATCGAAGGGGGCCCATGCTGACTCGAACTCGCTCCCAAAACCAAAGAGAGCGCAGGCTTG  
CAACACCGCGCGTAA  
>locus0790  
AGGAGGGGTTATATGACGCGCGGATGAGAGGCAAAAGTCCGAGGCGCTCGGAGCGCGCTTATATGTTGGTATAGCAAAA  
CACTGTCCGGTATGACCGTCATTACCCCACTGTGCGAGAGCGGCCATTGTTGTTCCCTCGTTATATTGCCCGACGA  
GTGAGAGGATATATAT  
>locus0791  
ACTCCAGCACCAAGAGCTGAACCACTACCCGAAATACACAACCTCTACGCCGTGTCAACTGACAAAAAAGTGCCTGT  
GATAGTAAGCTTATAGTAGATCATTGAGGCCAGAAGACTCAGCAACACAAGGATAAATTCGCGGCCGCGCGGGCGCGG  
TGTGGCCTGGCGTCCG  
>locus0792  
GGCTTAGATTAAAGTAGTAAATAGAAATAGAAAAATATAATATTTATTTTGTGCTTTTTATGTACAGTGGACTTACGGTC  
ATTTCTGGAGTCATGTTGCCCAATTTCTGTAAACATGACAGCGTATATACAGCAGTGGGACTAACTCTAATATTTACAAA  
TTTCAAATAACACCTAA  
>locus0793  
TTGTCCTTGGTCTTGAGATTGAAGTCCAGACGTAGTGGGGCTCGCGTACGCGTCTGTACACCGGGCACTCGTACAT  
GTTGCGCAGATCCTGTTTGTCCGGTGTGGCGGATGTTGATGACAGGCATCGCGGGAAACAGTTCTTGGGTCGGG  
AGTCCACGATTATACCG  
>locus0794  
TGTACGAGTGGCGGTGCATACTACGTCAGTTAGAGGGTGCATCAGAGCGGGTGCAGGTTGGTGTGTCAGCGCGCTGG  
TTGCTTGGTTTGTCTAACCTTTGTTACTTTTGCAAATCCAAACGTATGGTTTGTGGCATATCAGGATCGAATCTAA  
CACCTGCTGCAAAATATAAATAGTAAATGAAGA  
>locus0795  
GAGAGAGAAGACCGTTTTAAAGACCGGAGCGCACTAAATCTCCGCGGCGAACGTTTACGGGTTTTTCGGGAATGTTGAA  
CAACAATGACCGCTAATAAAGCCCGATGTTCCGCGGGGCGCTCACGTGGGAAGATATCAGATTAAAGAGCTGAGA  
GACCTTAAATATAACG  
>locus0796  
TAATATTGTTTCGAATGAAAGTTATTTGTTAATGACACCGATCTGACGAAAGATATATGAGCGTATGACTGGATAATTTG  
ATAAATAAGTACAAGTAAAGCAATGTTACCTCATCATGAAATCAGTACTAGTGAATATGGATTGCCGATGTTTCTT  
TGTCATGCACTTCCA  
>locus0797  
GGGGCTCAAAAAGTTTATTAGGAGAGATTCTCTTGGACGAGCGAACGGTCTGCTGCCAGATGACAAAACACAGATA  
TTCTGTGAGGTATATACCTTTGTATGTTGTTTATACCTTCAATTTTCAAATGATAAGATACCTGCCAATTCGAAGCT  
TCTCACACTGCAAAAAC  
>locus0798  
CCGTATAGAGAGAAGGGTATACGTACGAGAGAACGCGAGCTCGATGCCAGCGGGAACGTATAATAAGAGTGGATTGA  
GCATTATTACGGCCGTTAATTAACCCATAAATCAAGCCGGGACGCGTATTCTCTCGCTCCCTCTCGACTTTG  
CTTCGCGGTTCTCTTT  
>locus0799  
GCAGATCATGTGGCCCCGATTTTACGTATACACACAGCGTAGCGAGTGCCTGTGTCTGTGTCCTGTCTCTGCAGAT  
GACCGTCCCATCATCGAGTATTAACCCGAGCTCCGCGCTCGCTCTCGTCTCTGTGTCAGCTATATAGCCCTG  
GCATTATTAGCCCTCCA  
>locus0800  
TACACAAAGTTGATTCCACGGGATCTGCTCTCTTTTCTCCGCCAGCAAGCTTGCCTCCGATTTTCCCAATAGTTTAA  
CTTACGCGCGATTACTGCGGAGATAGGAGCGGGACGGGAGAAAAAGACAGCTGCGTGGGTGTAATGTATGAAG  
AGGGACGAGTTTGGCG  
>locus0801  
CGGCGATCAGAGCGCGTGCCTAATATGGGCTTCTGACGCTCGCCCTCTTTTGCCTACTGGGGTGCCTCTCATCCATTT  
AGGTCCATCACACATGACTGGATGGGGTGAAGCTTAGCCCGCAGAGTTCTCACGTAGATTACCATCCGCTGTGCTCGCG  
ATCTCTCACGCGCTGC  
>locus0802  
AAAGTACGCTTGGTGGGGATAAAAAATCGCTGACAGAGCCCCCTCTAAATAGATGCGCCAGTCCCGGAAAAACTAGA  
ATCCGCTCAGCCGGCATCGAGTGCCTGCGCTCTCTCTCGGCTTCCCTGCAGCTCCACGCTTCGTTCTGATGCGCGCA  
GCAGCCCCGTAAAGT  
>locus0803  
GGCTTTCAGCGTTTTCTGCGATACACACAGGGTCTCCGTCGTTCCCTCCCGCGCTTACTTTATGGAATATCCGCCC  
ACAGCATATGGAATATCAAGGAAATGGGATGAGTCTCGTAGGTTCCCTTTTATTCGCTCTCCGAGAGCAGCAGCG  
ACGATGAAAGGGAAAAA  
>locus0804  
AATAAAGATGAAATCGCGCTCGCTCTTTTTTCTCCGCCAGCGCACGCGGCCAAAAAGGACGCGAAGAAATGTCGAT  
ATTAATAAAGTTAAATGAGCCAATCGCCGTTGAAATACAATGACTCGCGAGTGAAGGATGGGAAAAACGCGCGC  
CGAAGCAGAGAAAAA  
>locus0805  
AGGCGCAGGATATCGGGCGCAAGCCCTCTCCCTCTCAATTCGGTGTACCCGCGCCACCGCCACCTGTTTGTGA  
TTCATTAACCTCAGCGGTTATCGGGATAAGGTAGACTTATCCGGGGCTCGAAGCCGACCGCGGTTAAACCGATCTTA  
TTCCAATGGCATCCACCTATCCCATTTTCACT  
>locus0806  
TTTCGAGCAGCGCGCAAGAGAGCGACGACGCGGGCTGGGATGCAAAAGCGGCCAGGCCAATTTTCAGCAAGAAAAAT  
CTGATTCAATTTATGCAAAATGGCCCGCGCTGGCTCGGGGTTTCGCGACTCCGTTGTTGTTGGCGCTCGCCGTGCGCTG  
GTACACGGGGTCGGGA  
>locus0807  
GCAGGCTGACTCCCTCTCTTAAATCGAGTCAAGATTACAAATGATTCCGATATAGCCGCGCAGTCTGTGTATGAA  
TCAGGCGTACGTTTCCGGACGCAACCCCTCGGAAAGCTGAATCAGCGCGCGCAGTTTCCGATATATATACATGCCGTA  
TCGCGGCGCAACGGAG  
>locus0808  
CGGGGGAGAGTGTCTGCTGTACGTGGCCGTGGCGCGCAAAAGGGCGCGTATGCAGATGATCGGGAAAGTGGAGTAC  
AAAGGGCCATAGTCTCAGCTATTGTGGCCCTCAGGTAAGATAAAAGGGTGGATTTCCAGCAGCGCGGTCGGATGAT  
GGCTAAAAACGGCACGG  
>locus0809  
AGGCGATGACGGCAGCGGAGGCGGCTAACAAATGCGCGAGCGAGAGGGAGAATGTCAAGTGGACATTGTTGACGGTGACA  
ATGCGCTGAAATGCGGGAGAAACAAGAGGTTTATGATGACGCTGTGGCGAGCGAACGAGCGAATTGAGCGAGAGAG  
CCGGCTCTGGGCACAA  
>locus0810  
CGCCCGTGGCACCGCACCCCGGATTTCTGACGAGCTGTGTAGCCCTTCTTGTGTGAGAGTGGGAAACCGTGA  
CCACCTCTCATTACCGGTTCCATGGTGGGAGTGTCTCTCGACGCGATGCGAGATGATATTTTACCGCTGGATAGA  
GGTGGCCGCTACTGAT  
>locus0811  
TACGTGGGCATGTTGTGCGCGCTCTGTGCGCCCTAGCGGGGCTACTCAAAATCGCCCTGCCGTTGCCGTTGATCGTCA  
CAACTTTGCGATGATACAGTACACGCGAGGCGGAGCCAAAGCTCCCGAAGAGAGACGTCAGTGTCTCCAGTGGAGC  
AGCCCCGACGAGAGCG  
>locus0812  
GGGACTGAAAAACACTTCTGCGCGTGGCGCAGCTGGCGAGGGTTCGGCCCGGCTCGAATTCATGGGATCGGTGTA  
TTAAGAGCCATTTCTACACGATTTTCCCGTGTCTCCCTGGCGCTCGGTTAAAGCGCTGCGCCCTGTGTATAGGATG  
CAATGGTATATAGGGG  
>locus0813  
CCGCGTGAAGAGCGCCGGGGGAGAAGTCTGAGTCCAGGTTCCCAATGTCGCCATCGAGCGCAAGGGCATCATTTCTA  
ATTGCCCGGACTTCTTTTCACTCCCTTTGTGCGCGCTACTGCTCGCTTCTCTCGCCCGCACCCCTTTTCACTCCG

AGCTCTTTTCCCGGAGA  
>locus0814  
CAGCAGCGGCAGTCGACAAGGACGCGATCGCTAGTCGGGGTCTCGGGCGGGAGAGGGGTGCTCTTTCAAAGACTC  
AAAATTACTTTCTGGATAAGCTGGATTAGGCTCGCTGCCGCCCCAGATTAGACCGGTGACACTCTTCCCCTCCGGC  
CAGTCCACTTTTCAGTA  
>locus0815  
AAGGCGAGAGTCGTCGAATAATCGCGGGAGAGACATTAACCCATTCCCCTTTGTGCGCTTTTCTCCGCAATTTTCCG  
CCACATTTGCTTTGTCTCGCGACAACAATGCCGCGATGACATAAAAATATGCGGCCGCTGTTTCTCTCTTTCTCACGC  
CGCTCCCTCTCGTTCCG  
>locus0816  
CAATTGTCAAAGTGAAGTCTGTATAGCGCATCAGTATGTGAAGTCTGTTAATGCATGTTGTTTGTCTGTCTTGC  
ATCAGGGATTTCGGTTTGTAAACATTGCAAAATAGTGTGACCGGACCGAGCAGTGTGAGAGCTACACGGCACCCTGGT  
TGAGGCGAAGAGATTGAGGTGTGCATGATT  
>locus0817  
CGACGCTCTTACTTCGCTTCTCGGTTTTTTTTACTCTCGCTTTCCCAGGGGCGAGCCGGCGCTACAATAAAAAATTT  
AATCAAAATGCCCTCTTGGTAATTTACAGCTCGCAGGCTCAACCTTCCCTCGAAGAACCGGTATATACGCTGCCGCT  
CCTTTTCTTCCGCGC  
>locus0818  
GTGTATAGCGCGTGTACCAGTGGCTCTGTCTTGTGCGGACATAATCATCGAAGTATCTAAATGACGGGATTCGGAT  
GTATTACCATATAAATGACATCATATTTCTGGTCAAGTTTCCCAGTTTGTGCGCTCTCGCCCCGCTGTGATGTATGA  
CGACGGCATATTGGCGC  
>locus0819  
TGTGCGTGAGAGTGAGACCCAAACGTCATTCCTTCCATATCCACATTCCTATCAACGGAGATGGTAACCCAA  
TCAGAGAGAAAGGGGAGAGGGCAAAATGGTTGCCAAGTAAGAGAAGTGCATTTTTTTTGTATATTTAAAAATTC  
TTCTATACGCGCTTATA  
>locus0820  
AGCTACTGGGACAGGCGCCGGGCAACAACGAGGCGGCAAGCGCTCGCGGAGAAGAGGCGCTTCAACGACATGTTGCT  
CGACGACGCGTGTAGGAGCTCAGCAAGGAGAACCACATCTGAAAGCCAGCTCGACGCGATCCGCGAAAAGTTCGGCA  
TCTGCGCGGAGTCCGCTG  
>locus0821  
CGCTCGCTCTATCCACTTGCAGCGCTGAACTCCCCCTCGCGCAAGGATGTTGAATTCGAAAAGTGTATTCCGCGC  
TCTATCTCTGAATGATGGAAGGGAACGCTCTCCACGTGGTGCCACGTGTGCGCTCGCGCAAACTCGTCCCAGGAT  
CAGTCCGACTGACATTG  
>locus0822  
ACAAGGCATAGAAGAATAAAGCAGAAATGACGAGCAGCATGCCATCGCAGGTTAGAAAATAGAAAATCATAGCAAAAAC  
AGTTTACCATCTTCCAGAGATTGGCTTTTGGCAATGGATCGACATTTGGCAGTCGATTGCGAATTTGGGATAGTGTATG  
GTTGGATCAGTGGGAC  
>locus0823  
CCGGCAGGGCCGTATTCTCCGCGCGTCCAAAGTTCCTCCGAGGACTCAAAGTCCAGCGTCCCCTATGAGCAAGTAA  
GCACCGAGGAGCTGCACACCCATTTCTATACGCTCCTGCAAGCAAAATGGGAAGGATGCACTCGTTAGAAAGGAAATGC  
ATTTACTTTCAAATTA  
>locus0824  
GCGCAAGATCAAAGAGATAGCAGCAAGAGGCTCGGTAAAAAGAGACGAGAAAAGGGATACCTCAGGTACAACAGCCA  
CAGGCAAGTAGATCGTATATCTGCGGACAGCAATTTGATGTCAGAAATATTGAATGCTTTACCGTCTTTCACTCT  
TTCTTATACGAGTATA  
>locus0825  
CTCATAAAGTTTGTCAACCGCGGAGCCGCTCGTACCTCAGGCATTTATAGGGTCCCCTGGAAGGACGTTAAAATG  
TTCCAATCTTAATAGGTAGGTGTTTACAGCTGGATAATCTGCGACGAGCTCGTCCGATTCGCGAGGCGCGCTCTC  
GTTATGCGGCTCGCGC  
>locus0826  
AGAGAAACGATATAAGGTGTCCTCGCGTGTAGGACAATATCTTGGCGGACCCCTCGCGCCCGGTAGCTATTAGCCGAC  
GTTATGAGCTGTTGATTTCCGGCACAGTGGTCTCCCCCTCCGATATAAGCTGCGGAGCTCTGGCGACTGATTTA  
TTGATATCGCATGCAAA  
>locus0827  
TCTTCATAGCGACCTCTTGTATCTACCATATTTCCGGAAGAACTTCTCAAGTTCGCGCTCTCGCACCCGGTAAAGTAA  
CCACCACGAATACCTCGGTGCTCATTCTTAAAGGAAAATATAAAAAACCCATACATAACAGGCTCCTTTGGAACCTG  
CGCTTTTTTATTTAAAGAAATTTAAATTA  
>locus0828  
GAACCTGCGTCTGGTCTTGGGGCCATCTTCTCCGTAAGGATAGTCCGACACGAGCCGACCAAGAGCTCCAGCCC  
GTACGCGTCCATGTAACCCAGTCCATGATCGCATCCGCATCCAATAACACCTCTGCAACCAACAGATACTACTCAG  
TCCCATTTTATCTAACA  
>locus0829  
TTCAGTTGAACAAAATGCTTTGCTTCCAGTTTGTAGGTTTGGCAACATCGAGGAAGACAGCCATCTTATCACACAC  
GTTACGATTTCTTTGTATCAAATACTCTTCGATGTGCTACTCCAACAATGATGATTCCACAGTTCGAAAACAGATTCGG  
CTTGCGAGGATCAAGG  
>locus0830  
TGTTGGTGTAGTGGGTATAGAAGCAAAAAGCAACATCTTTTTTTCATATAAACAATTTCTTATCAACGATATGTT  
CTTACATTTACACAGTACAAAAATTAATCTCAGACCCCGCGCCCGGGTTTCAAAATGAAGTCTATGACTTGGGGA  
CGGCCGACGCGCGGT  
>locus0831  
TCGTACGCGAAGCAGGAGTACGCTCCTTAACGGGCTCTGTTATGCGCAGCCCTCCGGGTTTAAACGAACCGCAATGCGT  
TGTTTTAACGACGCTGTTAATATTTAAACAAATATCGCGGAGGCCCGCCCTATAGCACTGCGCAGACGGGAGCAGGCT  
ATGCTGTTGTGACCT  
>locus0832  
TGCTTGAAATTTGGCGCAAAATTAAGGAGACGAGAGCGGAGAGCAACTGCCCGCTGCTGCTTTGGCTGC  
GTACCGGAGACATTAAGTAACCTCTGCGCTCGCTCTCACTCGCTTTTTCTCTCTCTTTGACCTCTCTCGCG  
CATACACACCTTACGTA  
>locus0833  
AGGACTCGAGAGCGCGCTCGGAAGAAAGGGATATAGTCCGCGCTGTGAGCGAATCTGCGCCCTAATATTTTACAG  
ATTTAGTAGATCGTTATGGCTTGTAAATTAATACCAATTTACGCCCCAAAATTTATTTATCGTCCGCGAGCAGCTCG  
CGTTAAGCCGAACTGCT  
>locus0834  
GGAGTATATAGGTATCCCTCTCACTCTCTTACTGGCAAGGATATCCCTTGGGACCGTAGCGCGGAGCAATACCTAAC  
GGAGTTTATTCGACATTTGTAATGGCTCAGTTGAAAAATGATAAGCGGATGACCCGGGAGGGCCCGGGCCCACTG  
GGTAATGAAGTACGGTC  
>locus0835  
TTATTTAGCTGGCTGCCGCGCGGGTCCCAGCGAGAACTGTTACTTTTATGTGGCGGATTTTGTATCCGGTTGCCT  
TCCTCTATTGCGTGGGTTTTGGGGTCACTTTTTCGCTTCTCGTGAAGTGGCTATTTCAAATTTGAGAGCGG  
GACCAGCGCTCGCCAA  
>locus0836  
GCGAGTATTTTTTATTAAGTTTATTTATATATCGACAACAACAGTCAACATTAGAAAACAGAAGGTTTCTTGAAG  
CAAACTCGAATGAAAAGTTTTGTGAACAATCCGAGAGACACTATGTGAGTGTGCGCGCTTCTATCTATGGAGTCGTAT  
ATATATAATATCGTGTG  
>locus0837  
AGTTCGTATATATAGTCCGCTTCAATGGCCGTCGACCAATGGCGAGGATCGTAAAGCAGGGTTAACATTCGGTCCG  
GGTGTCAAGTGAAGAGTGGCTTGAATTCGTTGCACAGGATCATTTGTGAGAGCCGTTTATGCGGAGATGTAAGCCTT  
ACCGTCTCATTTGCTC  
>locus0838  
GAGGAGCGATGGTAAGAGAGGGAAGGGAGTGAACCTCTCTCGTGTATACGAGAGAAGGAGTGTGAGATGATGCAGTT  
GTGCTTTTCAAGGAAGGGGAGGAGGAAACCGACGAGCGCGAGAGAGCGGAGGGGAAACCGGTCCTGCTGCTGGCCAC  
AGCCGGCCGTCGAACCCGCACTTGC  
>locus0839  
CACTTTACGCGACTAGTCCGCGCTTGTCTCGATGCGTGCAGGCTTCCGCGCGCAGCAGTGTGCGCGCTCAATTACG

ATTAATTAGAGCGGAGACTGACAGCGGACGCGCAACTACTCTGTCTGCGTGCGCCGAAGAACGAGCAGCCGTTGACGCTT  
TAATGCCTTTTAACTTG  
>locus0840  
GAAGCGAGGGACAAATATATACAATAAAATTC AATTTGACCAAATATCCATGGTTGCTTATAAATATAATAAATAA  
GAGATACAATGCATAAGATTTATTTCGAGCTGTGCTCCACCAGCCACCATAAAGGTGTACGTGGGATCGTTTTTAAACA  
TTTCTTACCAATGCATA  
>locus0841  
CTTGTACGCTACAGCGAAGCTGGCGCGCTTAATAGTTTCGCCTGAGTTAATGACTTTTTCCCTCCTAATCAGGTAAT  
TCCGTATCTCTTAAATAAATCTCGCCGCCCTGCGCGCTAATGAAATCTGAACTCGTTACTTACACTCGTGACGACGCA  
ACGAGCCACCTCTCTCG  
>locus0842  
CGAAGGAAAAATTAAGGATGACGATGTACGGTGGTCTATGTAGAAAGGTGCCATGTATAGTGTTTTTGAAACG  
TGAGCATTAAATGCTACATCTGTGTACATACGCTGTTTTGCAATTATTTCATTCTTCCCACTCTGTGATCCCACTTA  
TTGTTTTCTCCCTTTTA  
>locus0843  
GAGACATCGACTACTGCGGCGTAGGAGGCGGAGCGCGGCTAGTCTGGCCCGCTATAGACGGCGATCGTAAACATTT  
CGTAAATTTGCTCCACAGGTGTGCCATCCGCACGCTAGCCTATTACTCCGTATACGCCCTCGAGCCGACAACTCTTGTG  
TAACGCGTATACACGCG  
>locus0844  
GTCCGCTGCTGCCAGTGTGACGGGGCTGCGAGCAGAGGCCAGCCGGGCTTTTATCAGGGCCAGGCTCCCAATTAAG  
CGGCAGCAGCTGTGAAATTAATGGAGCAGCTTTTAAAGTGAATTTGGGCACATTCATAACTGAGTGGGTGAGAAATGG  
GCGGCATCGCGCCACAG  
>locus0845  
GTCTCTCAGCGGCTCTCTGTCGGGCAAGCGCCGACCCGAACTCGCCGATAATGGAGGCTGCTAATAAATTCACCCGT  
TAATATAAATAAATCGTTAAATGCACCTTAGGACACACTTACGGAGCGGCTTGGCACCGCGCGCCCATCATTTTTTATT  
GGAACCACTTCTCCCGG  
>locus0846  
CGGATGAATTTGGTATGTATAGCCCTGGGGTGGCGTTTTTTCGCGTATATTTTACTCGTGCAAAAATAGCGGACATCCATC  
GCATTTCCATCGAAATGGCAGCTGACGCTGGCGCCCAATGGCGAAGCGCGAGCCGAAGACCTCTCGGCCCTCAACGCTTT  
TTCCCTCCTTCGCTCG  
>locus0847  
ATGGTTCTAGATATTGGATCAAAGCAAAGGACCTGCCATTGAAACTTACATTGGATTATTGAAAATTATAGAGATCCA  
GCAGGTCAAAGAGGAGAAATTTGAAGATTCTGTGCAATGGTAAATCGTGATATGTCCAAAAGTTTTTAACTCTGTTTAA  
CAATGCTGAAAACATAT  
>locus0848  
TAATAACGTAATGAGCTCTTGTAGTTGATAAGTTGTACGAGTGGCTAATCGGTATACGAGGAGAGTGCATAGTGGCCGA  
AGAGCTGCTAGGCTGTTGGAAAGGAAAAATCATAATTTACGTGCGTGACAAACACAGTCCACGCGCTTCCCTAACTCGAAC  
TAGTGTATATATTAGA  
>locus0849  
GAGATGGAGGGAGTAAGAGCCACTGCTGCTGTGCTACATCCGCAAGGCTATTATAACCCGCTCAAGCGAATCTCTATTAA  
AACGTGTTTACACTGGCTTAGGGGTTGACTCAAGCCAGAGCAGCAGCAGCCCTCTGCTCGACGGTGGCGGGAGCC  
AAGTCTCTCTCTCTCTCTCTCAGTGCAGAGCTCTATAGCCCGGTATACAGCCGAGTAAATGCCTATCTAATTTGCGCGTGT  
ATGAATAGTGAATCCCGAAGCACTCGAGGCTATGAACACAGTCCGAGCTAACACAAGGGAGAGCCATATGACTAATTT  
ATAT  
>locus0850  
TAGATACGCTAGCGTTTTTCAATAAATTTTACATACTTTGATACGCAATGATGGTTCCAAAACGGTCACCGCCAA  
CCAAATTTGTTCAACATCAATACACCTACGCTCAGTAATCGAAGTAAATTTGACTTTGTAGCCATATACTATAAATATT  
TTTTTTTAGTAGTTCCGCCCTACCT  
>locus0851  
TCCGAGACTTACGAGGAGGCGACTTGTCTGCGTCCGCTATGGACGATGACGTGACGGCCAGCTCGCCGCTGCAGGTTG  
GCAATCAAACACGCTAATGGTATTTCCATTTTTTGTCTTTTTCGAAACGCCACATCCCTCACACCAGCGCCAACTT  
GTAATCTTCACTCTTT  
>locus0852  
GGACGACGAGGAGAAAGCGAATAAGACGAGTATACACGAGGAGGGGATTGGGAGGCCCTCATTCAATTCATTTACG  
TAATGAATTTGCTGCTGCTTTGAGTAAACACCTTCTCTCGCGGCACTGCTCTACTCGCTGTGTATATATATATGT  
ACATCGAACCGGGGAG  
>locus0853  
CGTAATGCGTCTCCCTCGTGTGTTTTGAGACATTTGTGACTAATTACATTTATATACTTATAAACCATCTGTGAGTCT  
GCCTCGTCTTTTATAAAGTCTTGTCTATATTCAAAATTTGCTTTCGGCGTCAAATTTATTACACACATCCCTATCTCG  
TATTAACCGCAACAGCG  
>locus0854  
TATCTTACTGCTTTTCGATGACGATGTCGAGTAATGCTCTCTATCTCCCTGCTGATTGGTGGTGTGCCTGTTTGA  
GCCACGAGTTCGGGATGAAAACCTCGTTATGCTGGACGAGCAAGGGGTAAGCCAACTATCTCTAGCCCTTTTCTCTAT  
TAAAATAACTTTTAAATA  
>locus0855  
AGGAACGGTAGGGTATGTCAAATTAACAAACAGTGTAGTCTGAAGGAGAAAACAAAAGCGTGAATTACCATAGTCTCT  
TGTGTAATTTCTACTTTGTAGGAGGATTGCTGAGGCTGACGTGGTTTTTTCGGGGGATATGTCAGCCTTGTCTGCTCGT  
TCTCCTTTTCATGAGCA  
>locus0856  
TTAAACCTATGTGCTCGATGAAGATTTTTGCGAGGAGATGATGTGACGCGTTTTTGTCTATTGATTTTCAGGGGCTT  
GGCAAGCAGGGCTATCAGTGTCAAGTGTGAGAAAGACACAAGTACGTTATTGTGCGATTACTAATTTGTGTTTTACCAG  
GCTTGGCAATACTTTT  
>locus0857  
GGACACATGCATAGTAAAGATGGCTCTCTACTAACTTACCCCTTTGTGTTTTTTCGATAGAGTTATTAATCTCGA  
GGATGCAATTTTGTACTTTGACTCAATCTGAAAATAGAAAAAGTAGAACATTAGAATTTTGACAGTGGTTTTTGGCTC  
TCTTTCTGCCATGCCA  
>locus0858  
ACACACAGGCACTCGCGGCTTTATGTACACAGACACAGGAGAGATCAAGCGCGCATAACCCCTGCATGAAAACACATGTGCA  
TACGGCCACATAATGGGAACATAAACCAGCGCAGACCTGATGCCCGTCCCGAGTATTAGTGTGATGGTGTACAGG  
TTAATTCACATGATTG  
>locus0859  
TCGACTATCTATCCGCGAAGCGGAGCTCTCTGCGAGCTCGGCCAACTTTACGATATCATAATACGAGTGAAGAAT  
GTGGTTTTCCCTTTCAAATTTACAAAATCTCCGCGCACCGGCTCTATATATACACCTATACAGCGCGCCCGCCACCAAC  
ACTACTACGAGCGCAC  
>locus0860  
TCGATGGTATCAATCTGCCTTTCTGTGCTGCTCTCTCTGATCATCTCTATAATTTGTGACAGACTGTGCTGTTCTTC  
TTGATTTCTTTCTGAAATTTTCCCATTTCTTCTTCGATAGGCTCTTTATACCAACATACGTCGCTAGAAAATGGTGT  
TTGCAATTTGTAATAAAT  
>locus0861  
CACTGTAATCTGTGTGATGTTCCGGTCTATTGCAAGTATGTGACGATGGGAATAGATCTAGGCAACTTTCGGCTCTC  
AGGACATTTCCAGTCCCTCCGAGCTTGAAGACTGTGCTATTGTACCAGGTATGCTTTGAAATTTAGAAAATAACAAAA  
AGTGAAGTACTTGATCTTTGG  
>locus0862  
GGCAGCGGAGAGCTGTAAATGCCAGCACGCGGAAAGCCATAAGCGCGTGTGCTGCGGGCTTGTGTGCGGCTGTAAT  
TACTATAATTTGTAAGTTCCGGGATTTTATGATTAGTTCTGGTCCATCAAGCGCATACCTACCCACCTATACCGAGCTC  
GAGTGGGGGAGGAGAG  
>locus0863  
CTCTCTCGGCTGCTGCTCCCCGTCGCCGAGTCCCGTCCCGTCCGTCGCTCGCGGCTCGACATCATGATGAAAT  
TCTTAGCAATTCATCGCAGCACCGCGCAGCTACATACGCCCCCGCCCCCTCGGCAACGCTCCGAGCAAGGCTAGCG  
GCGAACGCGCGCTGCA  
>locus0864  
GAGGAAAAGTCTGATAAAAAGATGTGGATCGAGGATGTGAGTACCTCCAGGATCACTGTTTGTGTCTGTTTGGCG  
TTCCTCTTTAGTTCGGTGGTATTTGCGCGGAAAGACAGTACGGTACAACCTGCACTGTGCACTGCTCTCCCGTCTG



CGCCATTTTCATAAATACT  
>locus0865  
ATATCTCTCGATTTCGCAGACGCCTTCCAAGACTGTCCGTGCCCTATGCAGTCGTGTCCAAAAACGCGGATACTGGGCC  
CTTATTGGTAATGGTAAGGGAGCCAGTAGTATCGGGGCCGCTCTGTATTCGCCACCCAGCGCCTTGGTGGGGCCGCC  
CTCGCCGGCGGGGGTC  
>locus0866  
GGCGAAGAAACAAGTCTCCGTAGCGCTGGCGCGCGATGAACTTTTAATAAATGGTAGAGTCGATATGAAGTATAGGAC  
TTTGACATATCGTGTGTCTGTAATGTATAGTTAAATCTCTGGCGGCAGATGTGGCACTTACCCTCCGCCCGCTTCTGCTGT  
ACTCGCTCTCTCCCTAT  
>locus0867  
GCAGAGCAAGACTTCAGATCGCTCTCGCGTGCACACTTTTATGTACGAAGCCTGAATAACAATCTGTCCAATTCACATG  
TCGACATCAAGAAGATAATATAAACAACACTACATCGATACATCGTCTACAAAACCCCGCTGATGTTTTATTAATGGCTCC  
TCCATTCGCGACGTTTG  
>locus0868  
CACGCAATATCGCGCTTCTGCTAGCCGAGTGAGAGCCGAAACTGTAACCTCTGCTGTGATAAATAGCGCATCC  
ATCAGCCGAGCAAGCCGCACTAATGCCGATCGTACGTTATCGTTATCAGGGCTCTCCATTTGTCCCTCCCTCCAC  
TGATGCTGCTCTCTCTC  
>locus0869  
GGGGCTCAGCGTGGCGAGGATGCAGAGAAACAGCAGCAGCAGCAGGAGTGTGTATAGATATGTGCGGTATCTCTA  
CTGACGGCCATGGGTTTGAATGGCCGTGATAAAATGCTATGCTTCCGAATGTTGACTAAAGCTCGACGCTATCCAG  
TGCAAGTGGAAAGCCAA  
>locus0870  
GAAAAAAGCGGATCATCCCAGGAGTGGTCCATCGTTGAGCGGTGAGCCCTCTGTTACGTATACTGAAGGTATACCGGAC  
AGAAATACACTCAGGATACATCAGTATACGTACAGGGGGTTTCACATCTCTGCTGTGAGAGTGAGAGCTGGCCCATC  
CATATACATGCATACGC  
>locus0871  
ACAAGACGACAGCTCGAAAAATCGCAGTGCAGCGAGGCGAGGAATAGTACCAGAACTAAATGGTGTGTGCGT  
GACCGTCCCGCAGAGCTCTGACAGCTCCCGCGCGAGTGGCTCGCTTAAGTCTCTGCTGTGCTGTGCTCGCGAAGC  
GCTCGCACGGCTTATCC  
>locus0872  
CATGAGTTATAAGGGCTGTCTGTAGCACTGGAAGTGGTACCTCCGGCGGATCCGCGGATCGCTCTTTCTCTCTCT  
TCTTCTTCTGCTGCCGATCCGATAGTTATCCCTGGCGCTCCATCCGGGATATCGCTGTTGACAGTTGGCGTTCGTCG  
CTGGCCCGCTCATAATATCGC  
>locus0873  
GGACAGCATGTGATGGAAAGATCGCGCAGTGCAGATACACACGCAACCCCGAAAAAAGTGTGCAAGTGTGCGG  
TGTCCAAGTTCGCGACGAGGTCGAAGCGCATCGACGCTACGCGCGGATAATATCCCCCTCGTTTTCCGCGTGTTCAT  
CTCGCGTACTGGTCAAC  
>locus0874  
TACGGCTGACTGATTAATTTCTGATCTGTTTTATGCTATGTTAGATGGGCCCGCGTGTCCGTGTCAACATATTTGT  
TCGAAGTATCTCAAAAATAGATGACGTTACCATGGTAAGTCTGAATAAATGACACACGCCCGAATATATTTATATATA  
CAACCCACTACTACTAC  
>locus0875  
ATCAAACCTGCCATCGATATGTCTCCTGAGAAATGACTGATTTGTAAGAGGGGCTCTATGTTTTGCCCCTAGATGGGC  
CGGCCATTGTCCGGTAAACCTGTTGTGCGAAGCATTGCACAATAAGTGACATCAAGATGGTAAGTATTTATGAACGA  
AATGCTAAGCAAGCAA  
>locus0876  
TTTTTCCCTCCTCTCTTCTCCGGTCTTTGAAAAATTTCTCCCAACCGCTGTTCGAGAGGGATGAAGATTAATTC  
GTTCCGCTTAATCGTATCAAAAGTTGAGAGCCCACTCGGAACCGCGCTGAACCTTCTCACTCTCGCCCTTTATTT  
TTCCCGCCGGTGTCTAC  
>locus0877  
AGCCGACTACTACTCGGAGAGTCCGTTCCGCGCTGCGTCCAGCGCTCTCGAGCTTCCACCTTAATCATATATT  
TATCGGACATTAATCAACCCCTTTAGGGGCTGCCCGCCCTTTTTTCCCGGTCGCGACAGTCAAGTCCGACGCTCC  
TCTCGCCGCGCTTAA  
>locus0878  
CGAACACTGCTGCCAAGTCTCAGGCCAAGACTACTCATAACCGAGGAGACTGAGCCAAGAGATATGTATATTAATG  
GGCAATCTTACATAGTTTTGTTTACCTTGCATCTCCAGGCGCGCTTGCAGCTTCTGGAGTGGTATACAAATACCA  
GGCCGCTGAGGGCGGC  
>locus0879  
GAGTCTGAATGACAAAATGAAGCGACGCGCCGCTGAGGGAGAGAGCGAGGGAGCGCTTATATACGTGTTTCCGCATAT  
TCCTCGCAATATCTCTGTTTATCTCTATTTGTCCTGTTTATCCAGAGCGCGCAGTCCATTTCCGGGCTGTCTTCGT  
CGTTTTAAAACGCCCTT  
>locus0880  
CACACGGGCGCCAGGCCGCTCTGCTGCAAGATCTCGCGCAAGGATTCGACAGGCCAGCACACTCTGACGGCACAAGAT  
CATCCACAGCGGAGAGGCCGCAACAGTCCAGACTTCCGCGCAAGGCTTCAACCGCAGCTCGACCCCTCAACACCCACA  
CGGCTCCACCGGAAC  
>locus0881  
GATTCGTAATATTCGCCCTCCGGAGAGACGTCGCGTCTGTCGAGACCAAGCAGGAGCAGCGAATTCACCTTTAATCAAG  
ATTTCTACCAATTTCCGAGCGCGCAGCGCGAAGACAAGCCCTTTGTTGCGCTAAGTGGTGGACTCAAGTGTTC  
AACTCCACAGAGAGC  
>locus0882  
GGGACTGGAAGAGGACCAGCTGTGTGCTGCTGCTGCAAGAGAGCTCTGCGAGGGGGAGGCAATGTGCTAATGAACGC  
CATTAAGAGCAGCGTTAATAGATGCGCTAATCTGATTTGTCGCGCTATCTCTTCTGACCGCTACACTCCCTCTTCC  
GGCACACTTTCTTTT  
>locus0883  
GCGCTGATCGCGCTTCTGACGCATACGTTGTCATGGACAGTATGGCGCGCGCGCGCGTGTGTTAGCGATAAATC  
ATGGTTACCACATTTGAGCCAGTAAATCATCGGACGCGGGGAGAGCGGAGGCTTCCAGCGTGAATGAACGAAT  
TCATCTCTCAAGGCCCC  
>locus0884  
TCGTTTTTCATAACGATTTTTTCCCGTCTTCCAGGATGAGTCCATCCGTTTCATTGAGGCTCTCTACCATTCTGTA  
GCTTTCTCGTACACGTTGTTCAACCTACAGGCAGCGAAGAGCGCTACTACAAGAAGCAGAGAGCGGATGAGCCTCG  
AAGAGAACCCAGTGC  
>locus0885  
TGTCTGAAAGTTTCGGGAAAGGAAATTTTTCAGAAAAATGTCGGCTCCCGAGCGAACGAAAAAAGCGCAATAATC  
TGCTGCCACTTTCTCTAATTAATGATGACAGCGGAAAAAACAATCGAAAAATTTGCCCGGACACTGCTCAGAGAA  
AAAAATCGCCGTTCTGA  
>locus0886  
TTGTCAAATGCTTTTACATTTATCATTTCTGCTTCTTATTCGGAACACGAGGCTGCTGACGACATTAGGCTTCTAG  
CACTTGTAAATTAATGCCAGCAATGTGCTATTTGTTAGTATCATCTCTCTCATCTTTTAACTATATTTCAAGAA  
TAATTTATCACATTTTA  
>locus0887  
TGTGCTGCGCTTATAAGCCACTGCGTCATAATGGCGGAAAAAGCCCTTTTTTCCGAGGACAAATCCGTTTATTTAA  
CATCGTTAAAAGTACAAAGCCTGTTAATTAATGAACGAGCTTGAAGCGCAGCAGTCTCTACCGGATAAATAATAGTCA  
AAGAGTCTGCTTCTATCC  
>locus0888  
ACACCCATATGTATATATAAAGCAAGGGAAGAAAGAGCCGAGAGCGAGAGAAATCAGGCACAAATCTTTTAAATCCAC  
ACAATTCGACAAATGGGCTTTATTTGTTATCTCGAGGGCCACATTTGTACTCGCGCGGACAGATACCGCCGCGGCCA  
GTGTACGGCGCGCTCT  
>locus0889  
CGTACCTTGGGCGAGTCCCGCTGTTGCTATCTTCTGCTGCTGAAAGTGTCAAGTGTCAATGCCGAGTCTTTGGT  
CGCGTGTCTGGTACCCTGCGGATCGGCTTCCCAAGCAATCTTCTGGGAGTCCACCCGCGCATTTGGTCCACCGT  
GAAAACGACCGTCTTT  
>locus0890  
GGGAGCGAAGAAAGAGCGAAAAAGCGCTGGAGGGGAGAGACGAAGTAAAGCGTCTCCGCAAGACACTTCCACGA

TCTCATGAATGAACTCGCGTGGCTACTCGAGCCTCGAGTGGGGTCCCCGACTTCCCCCGACCGGCCCGCGAGCGGC  
TCACTTCTTTCGCTCG  
>locus0891  
AGAGGGAGACGCAAGCTAGAAAGCCCTATTAGGCGACGCGGCCAACGTCGCGCGGTATAAAGCATAACTACAATTAGCG  
GTAATCCGCGTGACACGGGATGGCACCCCTTTGCCATATATAGAGCATTAGCCGCGCCGACGCGATCAGCGGAGAGCCGT  
GTGTCAATCCGAGACGC  
>locus0892  
AGAGATCAGGGACACCAAAAAAAGAACTTAAACCAATGCGTTTCTGTGTGTTCAAATTCGTAAGAGTGTGTTCTGGTTGG  
GTCCAGCTAGCGGATGAGGACTGGCTGACGCCCTAGCCCTCCTAGTGTAGTGGTAAGCAAGCGCAAGCAAGCCCCCATCG  
ATGACAGGACTAATCGC  
>locus0893  
TCCGGCAGGCGCCGAAAGATATTACACTTTCATGCCACGCGCTAAAGTAAGTATATAAAGCAATTCGTGTGTGGCCC  
GGAGATGGCCGTTTCTCACCTCGCAACGAGAAGTCGTTCCCTTTGATCTTGTCTGCTGACCAGTCCGTGGTGGGGG  
CCCCACCTCCTCCCCC  
>locus0894  
AATGAATACGCGAGAGTAGGGGGCAAGAGAACGCGCAGGGAGAGGCGAGGGGAAAGAGAAATTTACCGGCTTAATA  
ATATAAATGCCAGGCACCGCAATTACCGGGCGGAGTGACTGAATTGCGCTAATTTAATTTGATACCTTTTCTCTCGTT  
GTACTGACGCGCTCGCAAGC  
>locus0895  
CGCGCAATCGCAGAACAGTAAGTGAGAGAAAAATGGCAAAAAAACAATTAATGATTAACGCAATGATTGTGCTGT  
GTTGTACTACGAAATGTTGGCTGTGACTTATATTTGTAGCTATATACACGCAATACGTGCATAGACACAATATATCGTA  
GGTTGTGCCATACGATG  
>locus0896  
CTTCCGCACTAGAGGACACATCCCTAGCCACCTATCGATCTATTACGTGTTGAACAAGCAGTAAAGGGTTCCAGCCCAA  
GAAGCAAACTAATACGATGCAAGGCTTAAATAAATGCTCGAATACACCTACGCTAAAATCAGCTCGTACAAAAGGTGAG  
CTATATAAAGTAATAA  
>locus0897  
TTTATTTTATAATCCCAATAGTCTAAAGTAGTAGTCTTTACCTCGTGTGACTGTGAGAGTGGTCTTGCACAATACAATG  
GGAATAAATATAAATCTTTGGCTACGCTTGGGGGTACGGACACTCCAAGTGTCCGAGTGAAACGAGGCTCCTCTCT  
CTCATCTCATATTGAGC  
>locus0898  
TCATCTAACCATCCACAGCAACACACATCGCGTGGCACTCTTGGCACCCATTGCGCGTGCATTCTTTACTCCAAGCAG  
AGTCATGAGAAATGAACGAACCTCGTATTTGTATATAATCGTAATCCTCGTACTCATCAAGAACACAAAATCGGAT  
AGTCAAACACCAAAAAG  
>locus0899  
TGGGAATATACTATGCCAATATGACCTCGAGGGCTTGTTCACAGCGAGGGTGGTGGTAGCCATGTAACCGCGCCACC  
CGCGAGTGTGGCTCCAACGCCAGCCGAATCCCTCATCTCCCTCTCTCCGCGCTCTCTATCTGCTCTGTGCGCCCCG  
TCCGTCCCTCTCTCTCT  
>locus0900  
CGTATAAGTATAACCCACAGTGTATACTCGAGGCACAATGGGGGCGCTCCATCCAATCGTCTGCGCATCGTCACCCGG  
AGGTGGCTCTGATAGAAATGATTTGGAGCGTGCAGCGCTCGCAGCAGCGGCTAAATCGGACACTACGTCGGAGTGCCG  
GCACCCAGACTCGCGC  
>locus0901  
CAGGGGAAAGAAAAGAGGAGCAAGAAAATGCCCTAACACAGCACAAATCCGGCGGGCTTCGTCTGCTTCGTA  
TGGATTTTAAAGATCCCGGAGATTATTAATCTTTTCCCTTTTCTTTGGGTTTTATTCTCTATATGATTGCGGAGAAG  
AGCGCTATATATCTATA  
>locus0902  
CAACACAGCCGCTATAGAACAGAGCGAGAGAGAGGATGACTATACCGCGAAAACGGAGGATGTGGATGGTTGGGTC  
TCGCTCGGCTGGCGAGCGCTCAATACCTGCGAACCCAAAGGGGAGGAAATACGGGAGGAGTACTAGTCTATCTCA  
CTTTCCGCGGCTCTTG  
>locus0903  
GCGCACAGCATAGAGACAAGCGAGCCGGTAAATTTATGCCCTCGCCGCGCGGCAAAATAATCCAGCTTAGCGTATT  
GTTTCCAGATCAGGAGAAAATATATGTACCCCGAGCGCTATATAGCGGGAAGAAGAGCTGCAGTAGCAACGAGTC  
TCCCGCGCAGGACTCA  
>locus0904  
AACGACCGATACAAAGCCGCGGAAGGGCCAAAGTCAAGTGTGTGAAGCGGTTTTCAGCATGAGAAACGTTTGTCAATAG  
CCTGTTAATGCGCTAAGCCATTAATCTTGGCAGAGCGCCCTATGCTGCAGGATTTGCGCCGAGTCGACGAAATA  
ACCTCGCCGGGCTTCTC  
>locus0905  
TCTCTGGCCAAATTCGATGAAATTTCCAACATTAATTTGTATCACAATGGTAATGAACTCGCGAGCTCCGCTATTTGA  
ACAAATAGTTGGTTATATATGTAGATTTCCCGTCTGGTTCCTCTCGCGTGGCGGTTTCTTTGCCACCCCTAGTGGC  
CACCCCTTTATCGTCG  
>locus0906  
CTTTGTTTCTTCTTCCCGCGCTCTTTAATCCCGCGAGCAAAGCCGCTCTCGCGGTGTGAACGCAATTACGAT  
TGTGTTTGAATGAACAAATCAAGCGCCCTCGAAACGCGCCCAATCAATTTCTGTTCAATCGACTTCTGCACGCGC  
CCGCGCGGAGAACCTC  
>locus0907  
CGAGTTGTATACGCGGTACAGCCCGGAAAGACTGCTCACTCTCGACAAGCTCGCCCTATGCAAAATTAATGCT  
GTTTCCATAACCAATCTGTCGTTCCGTTCCATTGAGTGAGCTTTCGCGCGGCTTTGTCATCTCTCGCGAGCGGAGGAACT  
TTCACAAGCGAGCTCTC  
>locus0908  
CGCAAGAGTTGATGTTCTTAATTTTGGTTTGGTTGAGGAGTTGATGGGTATGGATGAGCGGGTGTTCGTCGATGTAC  
TGGGTGCTCGTCTTCCACAGAGCAAGCTGACGCGGCACATCCTCTGCACAGCTCGAGTCCGTCGAGTACCGCGA  
GCAGCGGCCACCTGC  
>locus0909  
GGCTGTACCTGGGGCGGCTCAGCGCTCGATTGAATATGCTCTTTCCGCGGCTGTCGGGTAATGGGTGTGAAATGAA  
ATCTAACGAAAACCCCTTTTAGCGGTGTCACAGTCCGCTCTCGGTATACGACTGAGCGAGCCAGAGTTATCTCGCTC  
GCTCTCCCCACTCTC  
>locus0910  
GGAAACAGAAAGAGCGCAACTTGTATAACGACACCTCTGATTGGATCGTAATTTGTAATAACCTAATGGACTTCTTAA  
TTATATGCTGGTATGATAATACATGTGTTCTGCCACAATAAAGCAGTTTTTTTAACTACGCTGTGTTCTGCCCTCAT  
TCATTTACGGTATCCCT  
>locus0911  
GCGAGACCCCTCACCACTTGTGTGCCACTGAGCGATGCGCGTAGTTGGGGCCGAGCCAGCTAGTGAGCATGTGGC  
TCACTAGAGAATGAAGAAGCAAAAACGTCGCGACTTTATCGTTGATCGTCTGCACGTTTACCTATCTCCTGTTGGCGAG  
CAATCTTCGACGTCCTC  
>locus0912  
TGAAAAGAAACCGTGACTCCGGAAGGAAAGTGTGCGCGCAGCGTCCGCCGCTGAAGACGCTGGCGCTTTTTTACGCG  
ACACAAGTAGCACTTTGCCAAATGACCCGAATCTTTCCGAGGCTCTCTCGCTCTCACGCAATCGTGACGCGAGCCA  
AGGATTCCTTTCCCAT  
>locus0913  
ATGGGTTATGTGCGAGAGCGCAAGACGGGCACATAGCAGAGAGGAGCGCGCAGCAGTATCGCCACCCCGGGCTCGTTA  
ACCCACGCTCTGTGAATTTGAAATACCGGGACGCGCGCGGAGCAGACGCGCTGAAAATAATGCGGGTTATCAAC  
GCGAGCGCGCTTCTGTT  
>locus0914  
GGAGCGGAGGAGGATGCAAGAGAAACGCGAAGGAGACGCAAGGAGCTTGCAAGGGCCCTGCGCCGATACAATGCTT  
CGATTAACATTCGCTGCCAAATATACAGCGCTCGCTCGTGTGACTCTCCCTCGCGGCTGTAGCTGCTGCTGCG  
CTGCAGAGACACAGA  
>locus0915  
AAGCACCGCTCGAATTCACCTTTACCTGTTAATTTACCAAACTCGTCCAAGATCTCCTCTTTGCCTTTTGTACTTTGGTA  
TGTTCGCCAGAAAAGTCGTAGATTAGGAACGCTAATGTTTACTTTTACAGACTCTTGGCGGGTTTTATTTCTGTAATTATCG  
AGCTGTGGGATGAAGAA  
>locus0916

AGAGCGAGAGAGAGGCACAGGATTTACGGGAGGCTGATCACGAATGGACGCGTCTCTCTCCCGCAGCTCTGCCGCTG  
ACAGCCAGGAATTGGAATTGCATCGGCTCGCTCGATAGCCAGGCGAGCCGTCCATGCCAACCCACTACCGATGCTC  
CACTCTCCCCCTGTTC  
>locus0917  
GGAGGCTCGAGAGAAGAGAGCTACAGCATCGAGAAGTTGCCGGACATTGAATGAATTGAATCAGTTAGTCGGACGACATT  
CTATGATCCATCTTTTGTGCGTGAATAATTCGCTCTTTCTAAAGGCTAAGTCCGCTAAGGCTCAACTGCTTCATGACCT  
TAACGAGTCGCCGAGTC  
>locus0918  
AAAAAGCCGAGGAGTAAAAAGAGGCTGCTCGCTGCAGAAAATTTGGAGCGAGCGGAGCAACAGGAAAGGCTTGA  
TGGGCTTTCTACGAGGGAATCGCGTGACCGAACTCGAGCATCAATAAGTCGAGGCGACCTTTCGCCACCCACCTCCCC  
TGAATATAGCTACACTT  
>locus0919  
AGTTTTCTCTGTTTGTGGTCAATGAAGTACACCTTTCCATCGTAGTCTTCCGCGACCTCCACCTTCCGGAAGCGGTA  
TCTCCCATTCGCTCTCTTGGCATATTTACTGCGCTCTAAATTCGTGTGGACATAAAAAATACGCTGGATTATTATC  
TCGTCCATGCCTACAAG  
>locus0920  
AAAAAGGAGAGAAGAGCGGGGGGGGACGTTCCCGCTCGCGCGCAGCAATCCCGCTCAACCGCATTCAATTACGATG  
TTATCGCAATACAGATGACGCTTATTTCTTCCGTACACCTATACATAACCGCGACGCTGCGCGAGGCGAAGTCAAGG  
CTATAATGGCTCGGAA  
>locus0921  
TCTCTCATATTTCTTGTAGCGAATTGAAGCGGATTTGTGCGCAGTATCATGAGCGCTCTACATTTGTGAGGGTCAGA  
AGTGGGATTTGGAGCGTGAAGTTCGAAAAAGAGACTACGAGGTATTAATATAACAAAAGCAACGAGCATATAATATAAT  
GAAATTAAGAAAAA  
>locus0922  
GGCCGAGCGTAAGGTGCGGGGGCTCACTCATTTGAGCGGGTCTGTGACTCAGGTGGAGGCTGGACCGCAGGACGGCA  
CTTTGCTAGTACCTGGCAGCCTGTTGCCCTAAACGGTTCGGCAGTCAACGGTTACGCGGTTTACGCCAGCGTAAAAA  
GTCACGGATGTGGACAG  
>locus0923  
GAGATAGACCGTAGCGGACTAGACATATTTCTAGCTACAGTAGGCTTGTCTTCTTTTCTCTGAAGAAGTCT  
ACCTGTTTTCCGACCTAGTTCCGGCGCCAGCACCTGACGCTCGAGCGTCAACTGAACAAGAGCGTCTCATCGCTGG  
ACGCCCGGCAATCC  
>locus0924  
GTGCTCGATCAGATGATCGCTGTTTGTATCGGGTCTACGGCCTCCGTAGAGCCTGCTTCTAGTTTAGGGTTGGCAG  
AAGGCATCCTTCAAGGCAACAAACGCGAAGTGGACCCAAAGCTTGTGCTCTCGCTCGACAGAGCGGATGGATGACTCTA  
AAGCGCTGCGTCCCC  
>locus0925  
GAAAGAAAGCGCACGGAAGGAGGAGAGGAGCTCGGAGAGAGCGGAGTGATAAATGATCGAGTATTTAACT  
CTTTACGGATTAGCATATAAATACAGCCAGTCCATAGATCTTGGCTTGGCACAAGGCGCAATTAAGCCAGCCGGTCT  
CGGGGTAAACGATCC  
>locus0926  
ACGAGGAATGTAGTAAAAAGAAAGGGCGTAAACGGGAGAAAAAAGCCGAGGAGCGGTCACCCCAATAGCCTTTCTAA  
TTAATCTGGCAATGATTCCTGATTCCTTTCGAGCGGCGGCTCAAGACAGAGAGACTCGCAACCTTTCTATTACT  
TAGATCCACCCAGC  
>locus0927  
TGCCCGGTCGCGCATGCCACACTACGAGCGCGCGAGCGAAGTACGTACAGTAGGCGGCAAGGTCCTGTAGCCC  
ATTTGGCATTTCCCGACTATAGCGCGCTCCTGTAGCCCATGTTGTTATCGCTCCGAGTGCATAAAGTCGGCTCT  
CCTGTCTCTCTCTCT  
>locus0928  
AGCAGCAGTTCACAACAATCCGGGACATTGAGAACCTCTGCGAGCGTCCGCTACTGCTGCCGCGAGCGGTTGAATT  
GGATCAATTTGCCCGGTTAAATCAGTAACTGCCTCGACTCTGTACTCGCTCGCGGTTGTCGCCCTCACTTTCAATTC  
GTAGCATACATCCCG  
>locus0929  
AGAGCGGGCGCATTACGAAGGCAAAATATCCGAACGGGCGGAGCTCCGCGAGGCAAAACAATCGGCTAATGATAT  
GTAATATAGCGGAGCTAATCAAGCGCTGAGCCAACACAGGAGATGAGTGCCGCGCTACGGCCACTCCGAGTTCGAT  
CTGGTATGTAGAAGCA  
>locus0930  
CCTTGTGCTACAAAGTTTCCCTCGCATCGATGGCAGCAGATGCTTGAAGTCTTATCGTGTCCAAATTCGTGTTT  
ATCCAGTCGCTGAAGCGGAGCTGTTCCTCGTCCGACCGAGTGGTCTCTCTCGCTCGAGCGAGCCAGCTGCTCC  
AAGCCTCTCGAGGTTCT  
>locus0931  
AATCGAGCTTACAATATCGCGCGGCTCGAACCCCTACCTCCCTACCCATCGCACTTTAAAAATCTTAGACATCAACGT  
ACATTCATTTTATAAATAATCGTTATTAGAAACCTATCTTGTACTACTATGATTTAATAAATAAATCTGCTCGCGTC  
TCTTCTGCTGCTTTTT  
>locus0932  
TGTAACCTTTTTACACGTTTATGATTTAATATCGAATTCCTCTATGTTTTTTTTCGTTTTAATGCATTGATGCA  
AGGACCACTCAATATATCTCCCATCGCTAAACCCACGAAACTGCTTAATATGATATGATAGCTATCTTCTCTCAGT  
TTTATGTAATGACTTT  
>locus0933  
TCTCTGGTTTTTTCGTTTTTTCGGCTACCTATTGTTTTATTTTGTTCCCAAACACCCCTATAATCGAGTGTATACA  
GTCCCGGGGCTCGCGCTCGCAATGTAACCGGCTACCGACAGTCCGACGCTCCTACTGGTCAAATGGGAGCTCCGCC  
AGTCGAGCGCTCCAACG  
>locus0934  
TTTTTTTTCGCGCGACCGAGCGGTGTGCGAACGAGCAATAACTCACGACGCTCGCGGAGTGTGTCTGCGCGAAA  
TGACCTTTTAAATCCCTCCATAAAGCCAGCGCAAACTCAACCGCTGACGTGATTAACGCGCGCGGCAATAA  
TATCGGATCAATGCCG  
>locus0935  
ACCGCGGAGCTAAAATCAGAGCGGGAGAGAAGGGGTGAGCGGTGGAGGTTAGCGTAGCGGTTATACCAAGAGC  
CAATGATATAGTCACTATTACCGTCACTACATACCCAGCGGAGTATGGCGGTGACTGCGCTCGATAGCGCTAA  
GCCTCGGGGCGATAAA  
>locus0936  
GCCGAGGGAAGAAGCTCCGAATGTTTCTTAGGAGGCTGCCGCTGCTACTGCCGCGGATTTACGGAGCGAAGTGACG  
GGAGTGTATTATTGTCAGCATCTGTACCGCGCGCGCACGCTTTATCTCTCTCCCTCTCGTAGACCTGTGCGCA  
GCAGCTCTTCACTTG  
>locus0937  
GAAAGAAAAGAGGAGTGGAGGACCTCACCTCCGTACCTATTGCTCGGGCGGTAATGAATTCGCTAATGGTCTGT  
AAAAGATGCGATCTTATGGAGCGGAGAGGATAAAAATAAACAGCTACCGAGGAAGAGAGTGGAGGCTTCGCGAGAAAA  
CCCGATCGACGCGCTT  
>locus0938  
CGATCCCTCTGGCTGCGTTGGCTTCGCGGAGAGCTAGAGCTAACACGTAACCCCTCTCTCCGTTAAATCATTGAT  
TGTTCATATCTGTTATTGGCAATGCAATTAGCGTTTATACGAGCGCACGCTTAAAGCCGCGAGCTGCAACGCACG  
AGAGCATCGGTGAGAGTGA  
>locus0939  
AGAGCGCGGAGGAGCGGACTTTGGTCCCGCGCGAGCACACAAGACTGCTAGAAAATGCTGAAGCAATTCAGATGG  
GATGAGAGCTTTTCTTGTATGGCCTCCGAGTGTGGACCTGCAATTTGCTTCTACTCAAGAAAGCAGGTTAGAGCCGTAA  
GTAGTGGATGCACCT  
>locus0940  
GGCGGCTTTGGCGTGGCAAAACGAGCAGAAAAATGTCAGACTCGGAGTAGCGGGGTCGCCGTAGGTTTGGAAATGAG  
ATTTGCTGTAACCGCAATTTATCGTAGCGCGGATCAAGCGGTCATCTCTTGGCTGCTACTGCTGTTCTCTCT  
GACCAGATTATAATTA  
>locus0941  
AGTAGTAGCGAAGGGTAGGTTAGCTACTGTAATTAGTGAACGATTCGTAATTAGAGAAAATGCCACGTTAATTGCT  
AATTGAGTTCTGGCTGATGCGAGATCAATTTAATCACCTAATTACGTGACTACAGGCTGCGGGCTAGGTCGCGCGCA  
CTAAGGCTACCAATCA

>locus0942  
TAGCAAGAGAGGGTCGGCGGAACGGACTCTGTCCACTTCGGAGGACGCTGCCCGGCCAGCGGGTATTTGCTTGTCTC  
CTTGTATTAGAGATCAACATTTGTTATTTGGACCACCAGGGAGTTTCTCGCTCGCTGAGTGGCCGCCCTTTTCGCC  
TTCTCTCGACTCTGCTA  
>locus0943  
CAGAGTCTACATCTCTGGGTTACGTAAAAGCAGGGCTGCACACGAGAGAGCGAGCTAAAGGCCAATAAACTTAAAC  
TCCTAATTAAGAACGGTGAAGGATGAATCTATTATCCCGGAGCGAGAGGGTCACTGGCGGCCATAGAGGAGTTATACGG  
CTACCGAAGCAGACGCA  
>locus0944  
TAGCTATGGCTTCATCCATTTTCATGGCATTACAAGATCGGAACAAATAGAGTGTGCACGTCGCAATACGAATGCATTA  
TGCAATATAAATATTGATGCTTCCGCAAAAACATAAGCCGGGGTGCATCGAGCCGGAGCGCAACGAATGCAAGCAT  
CGGCTACGCCGGACTC  
>locus0945  
CGCGGGTGTAAAGTATAGCTCGGTCTTGTCTCCACCCCGAGCTCAGAGCCGATTCTATCGGGCATAATACCTTTCCGCTG  
TCCCTCTCGGATAATCATTTGTAACACCTAAGCACCTACCTAACCTAACATCAGCCAGCAGCAGCAGAGCTTTCCACGT  
TATCCGGTGTAGCGA  
>locus0946  
CAGGTTAGGCAGACGATGGCGTCTCGCGCCGACCCAGTAACGTGTGTAATTATATTAGCAGCTAATGGATATAGTTAA  
TTGCTAATATAGAGCCTGCCGAATGATCGATAGTAGCGAGATAACGTGAGCAGCGGTGGTGGTGTGTCGCGCGCGG  
TCGAATCTCAGCAGC  
>locus0947  
TCAGGAGCGCAATCTACAACGTTGGCAATCATTGAAAGGGGTGTGGGTCTATACCTTCTTGTAAATGTCAGTGTCT  
TGCGCTTTTCGCCCTCCCCCTTCCGACCTGGTCGCTACTCACAGGATGATGGTGGTGGATCATTGTCTGACGAG  
GCCGGACGCTCCTTCGG  
>locus0948  
CGAGTTAGCCTCGCGAAGATTATCCTTAGGCCTTCTCAGGCACACGGGCAAGCCTCCTTGAATCTTCTGACGAC  
GATCAAAAACCCGCTCAGGCTCCCCACGTCCTTATAGCAGCTCCCGCTATACCCGGCAGCAGGTTCTCCACTAG  
GTAAGTACTCGATCTT  
>locus0949  
GCCTGCACGGCGGACGACGCAAAAGTTCGGAGTGAAGTGGCGCTACTGCTGCTGTTGGCCGCTCTCCCTCTGGAATAT  
TAATATGACGGGAATATTATAAGCCCGCAGCGCCGCGCCCTGGGAATCTAATATGATCCGCGGAGGACGCGCGCGG  
CCCCGAGGTGCCGAGCGA  
>locus0950  
GGGTCTACTGCTCGGAACTCCCTGATGACCCATATCTATACCTATCATAAGAGCAGACCCGGCGATATTGACATTAAG  
TTCTTTGAAAGTTAGATAAGGTAGGGCCCATCATCTCTCAATCAACATCGACTGATCACACTAATCTACTTGC  
AATTTTTTTAACTGAT  
>locus0951  
TCTGGCTGGCGAGTATAGGAGAGAGCACTTATCATTAGGCCGATCTTCCGCCGCGGCTGCCTCGCGGGTAATGTTT  
CCTCCGGTTTATAGTTTTTATTCGACTCCCGGATGATCATATCGCCCCCTCCCCCTCTCGCATTTTATACCGCTCT  
GCACCGGCTCTCGTTTT  
>locus0952  
GGCACCCTGCGCGTTACAACCTGCTCTCCTCCGCACACCCCTACTACCCCTCTCGTTCGCTTATTTATCGCACGG  
AAATTTGCTGATTAGTATCGTGGGACTCGCTAATGCGTTGTCTCGTAAATTCATCGATTTTAAACGACACGCGAGAGCT  
CCTGACGCTCCATTGAA  
>locus0953  
GGAGAGAGTAGGACGCGAATTCGACGCGAATCAACGCGGAACCAATGAGTAAAGAGCAGAGGGGGCAACTGCAATT  
GTACTCTTACTGTCGCGGGAAGAAATGGCTATTGCTTGCAGGAGAGAGACAGAGAAAAAGCAATCGAGCCTCTAT  
GAAAGCCCGGCGAGCG  
>locus0954  
TGTTTGGCGGAGAAAGCTCGCCCGCGGGCTACTGCTAAAGTGAAGCAGAGCTTTTAGCGGAGTGGCTGATTTAT  
CAATGATTTATTCGAGATATTGAATTCATTTAGTTAAGTAGTCCGCAAGCCGGAGATCTCGGCTACGGCTGCTCCAC  
TTAGCGCCCGCAATCT  
>locus0955  
ATACTCAGCCACGCTATAGCGTATGTACACCTATATATACACGCTAGGCCCTCCGTTAATTTAGCATTATAATTGAT  
TTGCATATAGATTGAATCAGATAAATCCAAGGCGACGCGCGGATTATCACAGCCTGCACAGACCGCCCTCTATATTAT  
ATAGGTACGTGTAGCAG  
>locus0956  
GCTCGAGCTCTCCGCGCGCTTCTGCTACCTTGGGATTTGATGAAATTTTTTTCACACAGCCGAGAAATGTTCCACCA  
AATGAATCCGCTCGAATATPGCATTCGACACACAGCGTTTCCAATTTTTCGTTTAAATAAAGAAATTTCCCGCGCTAT  
ATACATACGCGCTTCT  
>locus0957  
ATTTTGGCTTGTATGTTGCTGTTGGCCAGCTCTACGTAGCTGGGTATCCGTTAGAGCTGTGTAACCTCTGTGGCCCG  
GTTGAAGTGGATACCCAGGCATCTCGTTTCCGACACATTTATCGCCGCGATAGTCGCGAAGCCCTTGACCTGCTGTCCG  
CCGGGCTGCACAACTGT  
>locus0958  
CTAGTGAACCAGCTCAGCAGCACACGGGTGAGTCAACGCAAGTGCAGTATTGCACGAAATCCTTCACGAGGAAGGA  
ACATTTGACAAATCAGTGCCTCAACACACAGCGAGTCCGCGCACCGCTGCCACTTCTGCTCAAAGTCTTCCACCGCA  
AGGAGCATCTGACGAAT  
>locus0959  
AGCACCTGCTCAATCAGTCCGGCAGCACACGGGTGAGTCAACACCGATGCGGCTTCTGCTCCAAATCGTTCACCGA  
AAGGAACACCTTGTAAACCATCCGCCAACACACAGGTGAGAGCGGTTGGCAGAGATGTTCACTTCGGCTAAACAAAT  
ACCAACACCTTGTCTA  
>locus0960  
CATTTACTTTAACTCCAATCTTCTGGCTTATTAATTTGAAAATTTGTTGGAAATAGATGGAGGGCTGGTCCGGG  
AGATGCAAGACCTGAGAACGGGTACCCGTGCGCAGCCAGAAGCTATTCTTACCTCGATCCCTTACGCGTTCATGGT  
GAGTCCAACCGTACCTGCGTTGTGGCTAAGCCTAAGTGGCCAACAAGGTCAAGGACACTACAGTAGGCTGCGTGGCTG  
TGCAGGTTACGACCTCATCGATGGCTGATGGAGCGCTCAACATTTGAAGAATCAGGTACGGAACATAATGACTAACAA  
GG  
>locus0961  
GACTCTTGACACCAACAGCAGCTTACTCAATCTTAATTTGTCATTTGTAAGCCCTAAACCTTAAATTTTTTACTT  
GGCATACCCCAAATATGGCAGGAAGCAATACTTAATAACGCGTACTTTAATCTTCTCATTTCTCCACAGAAATATT  
GTTTGTCTCATCTGTTATT  
>locus0962  
AGAGAGCCGCAACGAGGAAGGATTCCTCGGTAGTCTCGACGAAACCTTTTTCCCGTCTGCAACGGATCAAGCTTTT  
TGAGACTTGGATCCGCTACAAAAAGCGGATTCGTTTTCGTATAGGAAGATTGGCCGGTAGAGTATTCGCGACAGC  
TAACGGAGAAAAGTCGC  
>locus0963  
ATCATCGGGCTTAGGCAGGAAAATACGAAGTCGCCGAGAGAGTGGTGCACGGGGCTGTCTCATGTTTAAATCAGCGA  
TAACGAGAAGCCTCGGTGACATATGTACTGTGCGCGTACGTGCTACACAATCAATATAGTCACTCGCCGTCGCGCG  
CCACGACTCGACCTTT  
>locus0964  
TATACGGTTTATACGTGTGACGTATGGCTGTGGCGGTGGTGCAGAAATCGTCAAGAGGCCCTTAAACGCGAACGGA  
AAGCGATGCGAGATCCGCTGATGAATGTCCTTACACGAAACCCGCTAGTTACTCCGCGAGATAAACCGCTTCA  
TTATTCACTCAGCGCTG  
>locus0965  
GGCATATTGAAAAAAAACAGGATGATCGATAATGACGCGAGAAGAGCAGTCCGTTCTGGTTCCTACCTTTAAGCTCGTCA  
AAGTCTACAGACTCAGCTGAAGTTACCTTTCTCTCCCAAAGTGCAGCTGATTTCCAGCTTAAACCAATCTGCG  
GTTCTTATCGGACACT  
>locus0966  
GTTGGTTACAAGCAGTTAGAGTGTCCGAATGCGATGCGCTATCTAAGACAAGAACAGTAAAGTAAAGGTTATGTACA  
TACTGGCAGACTACCTATCTCTTGTGATCTTTGTAATCAGGCTCTGGTTCTAAGTACGGTTTCAAGTCTGCTGCTCCG  
TAACCCATGTTTATCCA  
>locus0967

TCCACAACTTTTCTCCGTTTCGCCTAGAAAAACATCTCGTCATATAGAATATATACATATGCGTTACTTCTAAACACA  
CTGAAATAAGAAGCACTTTAAGATAGATGCTCTACATGCACCATCCGGCCAGAAATAGATGGACTAATTTTCTGTTTTTTC  
TTACTCGTTTTTCTTTA  
>locus0968  
GAGTGAAGTTCGCTGGCGGTTTTGCGCGCATATTCGCGCGGTGCTCTCCCTCACTCTCCGCGCTCATACAA  
TTTTATTGGTAACTTTGCTAGCTTGTAGGCTGGCCCTACGTGCGCTGGGATAGAAATATCCTGGCAAGGTGCGGGTT  
GAGGAGCTTCTCTCT  
>locus0969  
GAGAGGGAGAGAGAGCCGCGAGGGAGAGAGGATGGCGCACGCCACCTCACGCTGTCTGGCTTAATATCCGCCACT  
AACATATTTTCATAAAAGTATTAATATAAATCGCGAAGTCCGCGCTTATTTAAACGCTCCGCGGACCTCATATATAGA  
TAGGCGACTGCTCTCT  
>locus0970  
TCTATTGCGGCTCGGCTTGTCCCCCGATCCATTCTGTGACTTCACCCCTCTCTGCCCGCGCTTACGCTCACAGCATG  
ACGCTCTTAACTAAATATGGACAAAGTGGCCGATTCGCACTATACACCCCGCGCCACTCCCTCTGTTCGCGCTC  
TCTCCGACGACCAAAA  
>locus0971  
CCAAATGGGACTAGTCCGGGAACCGAGGACAGGTTGTGCTCCGCGCCACCGGACGACTGTTGCTGCGGCTTACCTG  
CGGGGAACCGACTGCGCATCAGGCAAGAGTACGCGTTTTCCACACGGGACATGATCAACGATATATTTATGATTAT  
AATCACTCTATTGCCGT  
>locus0972  
GTGGTCTGCTGCGCTTTCGCGCATCCGACTCGCCCTCATCGGGCTGAGAAACCTCGTCATGCGCTGCGAGCTTCCAA  
TTTTCTTACACAGACTTAAACACGTAGTATAGTGGATCTGTGACTACATTAGCGCGAGTGGAAAGATGCTCCAGA  
ACTTGCCCAAGATCTCGGTC  
>locus0973  
GTTTTCTGATTTCCAGAGTATATTTACGGGCATCTACACATTTGAGTCCGCGCTTAAGGTGATGGCGAGGGTTTCTT  
CTGCAGCTTTTACCTATCTTAGAGATGCATGGAATGGCTCGACTTCGTAGTTATAGCTTTAGCGTGAGTAGTTACAAA  
TATATTTCTATATTATG  
>locus0974  
AGCCACTTGAACAGCCTGCGAACATAGCCTTGGACATGGCACCGGAGTAGGCGACTGCTCTGTTACGACCTG  
GGTACGAACCTGTTACCGACTTATGATCCTTGGCTTACGAACTTCTGTACATGCTTGGCAATCGACACCAAGAGT  
TAGCCACGCGCTCACCT  
>locus0975  
CAAAAGCAAGAGATACACTTGGCGCGGCGAGCCGAGCGGGTCTGCGCAAGTACGCGCTGGGAATAAGTTATGA  
ACTCTATGCATTTTAAATGACTAAATCTCGGACCGAACATGCTCTTTGCCGAGACTCTCTTTTCGAGAGAGGTGCATT  
ATTGGCTGACAACTCT  
>locus0976  
AAATAAACGTGCTCCCTCGCCCGCGGATGTATATACGGGAGCGTCACTCACAGTTCCAAAGTTTAAATGATCAATG  
ATAAAGTTTATCGATCATTTTCGAATTCATTTAACTTTAGCGCTCGCTCGGAGAGACTCCGACTCTCCAGGAGTATG  
CGAGCGCTCTGCTCA  
>locus0977  
CCTTCGCACACGTCAGAACGCTCTCCTCGGCCGAAATATCTGGTACGCGTACTCGGGGAGGATATAAATGAGCGGAG  
GAGTCGACAAATCAAGAACTATCGACATAAATAAATTTGTGGCCCGCGGGGTTCTCTTTCTCGCGCTCGCGGAGA  
CATACCGACTAGTCTT  
>locus0978  
TTTGGGGGACACAGAGCGGAGGAGAGAGCAAGGGTGGGAGGAGCGCGGGATGTACAGTTAATCGTTGGG  
AAGCTATTAACCTTGGACTGGAATGCCCGTATAGCGCTCATTCGTTCAATGCAAAATTTAGCGCGCGGACATAC  
TAGGGCCGTATATAACG  
>locus0979  
GAGGCGCTCTCGTGTAGTAGGAGACCGGAGGCGGATAGAGAGAAAGTGGCGAGGCAACGAGAGTCAATTGAG  
AGGTGTACTCTGTGGATATTCGTTTGTATTCGCCGCGGAGCGTATAGTGTACAGCTGCTATATCTGCTCTGCC  
CGAGCTCCCCCGACT  
>locus0980  
GGCTGCGATGACGAGCGGGGAGGAGGGGAGACTGCACCTACGCTCAGCCAGCGAAGAGAGAAAGGCAAAATTA  
TGACGCTCTTAAATGGCAAGTCAAAACCGCGGCTCGAGAGATTTTGTACTTTTCAATGAAGCGATTGTTTCATATTC  
TCGCGCGGCTCTCCCA  
>locus0981  
CGACAAAGAGTAGCGCAAGAGTGTGCGCGGAGGCGCCGCTGATTGCTGTTAGCGTGGCCAGCGCCCGTCTGT  
CACGAAATCGCTGATTTATCATGTTCAAGAAAGACCGAGCGCTACCGGAGTTTACAGGACCGCTATCGGACTCTGCC  
CTTAACAACCTTTCAGC  
>locus0982  
GAAGAAGGCAAGAGACCGGAGCGACTGTAACGATCAACATACCGGCGACTGCCGAGAGGATCACAACGTTGCTCGATA  
GATTCATCGAATACTATCGAAGAAATTTCCGAAACAATCCGACCAATTCGACACACCGCTCGAGCTTGGGAACGATC  
ACCGTCCACGCTCAA  
>locus0983  
TGATGACGTGTTGCGCATGTTGTTGGTGTTCAGTCCGCGCACTCAGCGTGGCAGAAATGATTACCTGACGGGAC  
GGCTGCGAGATGTACACGGAACCTCTCCCGCTTACCGGATGACATTCGCCAAGCCAGCGAGTAAAGTTGCTC  
GCTGCCAAGGCTGCCACAC  
>locus0984  
CAGGTCAAGTATGACTCGTCTGCAAAAAGGATTTTATTACACGGTTCCACGCGGATCGCGCGTCAAAATCTTTATTT  
GGAATCATTCGAAGAAATAACGTTATCTGAAAGTGTGCTCTTCCGCTCACTTAGTTACGCTTCCGCGGAG  
CCTTGTCTCGCGCGCT  
>locus0985  
CAAAATCGGAAATAGGATGCCTTGAAAAAAAGCGGATTTACAACTGTTGCTCGCGGCTGCTTACCCACTTAAAGAT  
TCCCTCGATATTAAGAAATATCCGAACGCGAGCGCGGCAATTAAGCCACTGTGGCTGCCGTTCCCTCGCGGCTG  
GTGTTGACTGTTCTCT  
>locus0986  
AGAGGAGAGACTTGCAGCGAGAAAGCTCGGAGCGACCATGATACACGAGCGCGGATCTTCCATCGAGAGAT  
TAGCATTTCCGCTTTCTCTCAACAATTTCTGTTCCGTAAGGATAGCCGTTAAGCTGCCGAGCGAGCTGACGGCGCC  
CGGAGATTCAGAGCTC  
>locus0987  
CGTACCAATAAACTTCACTCTCGCGCGCGGACACGACCGTCACTCTCGCTCCGGTCTTTTTATCTCTTATACAA  
CTCTTTATTCGCGGATTCATCTCAATCACATCTGCAGGCGGACCGCTCGACACGTPGACCGGACCGATATGGCTCGTC  
CGTAAAAAAGAACT  
>locus0988  
AGAGCTAGGAGAGTAAAGTGTGCTGAGGGGTTCCGAGGCTCATTTGGCCGTAATATAGAGTAAAAAAGGTTGATAA  
TTGATTACACAGATTTTTTATCGCCAGAGACGTTAATTTCTCGGCTGCTTCCGGTCCACCCCTCGCTCTGCTATAAT  
TCCGCTCGAAAAATCC  
>locus0989  
GCTCTATCAGATTTTTCAGGATGAAGAAAGCCTTAAGGCTGCTTACGGCGCGCAAGCAGGCAAGGAGAAACAGAAA  
TGAATATTCAGAGTTTATAGTCTGAGTAAATGTGACGGGTTTACCCTTCTTGAAGCTCCCCACTCTCCCGAG  
CCTTTCGACGCCAGAGA  
>locus0990  
CCGGCGGGTGTGGCGCGGATATGGGGCTCGACTGCTGCAAGAGGAAGCTGGCTGCTTGTTTATGGCCCGCATCT  
GTTGACGATCGTCTGTTCCGATACCACTTTATCTTGGCGTTAGCCTTAGCCGCTAGCCGCGCAGCTGCTACTGCTGTTGCGA  
AACAACCTCTCCCTCCG  
>locus0991  
TCTAATAGCCGCTCTGCTGCTGCTCCCGCTGCTAACCTCGAGGCTAGGACGCGGATATATACACTTGTGGGAT  
TCTAGCCGATGGTCCGCAATCTTATTTGGACCTCTCGAAATCACTCGCTTACGCTTCCGAGCCGATCCGTT  
TAGCCGAACGCGCGG  
>locus0992  
CGACGAGGAGCTCCACTGGTGGTGGTCTGCGGTTCTCTGACCGCGAGCTCGCGGAGAAAGCATGTGTCCAAACG  
ACGTATGCACCGGAGACGTAACGATATATCAGAGGTTAGCCGCTGGGACGAGTGGCCGAGCCATCTTTCTTCT  
ACTTAGATACACCGG

>locus0993  
GTAATATTGATTAAACGCGCGAAGGTCCCGGAAGGCTAATCCGACGCGGCCATAAACAGCTCAGGTCAGACTAAATCCGG  
CGCAAATTGTACTAATTTCGCATCTTAATAATGTCCGCGCAGAGGCGCTCACCGTATCTCAGAACTGGCAAATAGCCG  
CGATGACTAATGACAGC  
>locus0994  
ATTGTGGGATGTGTAGGCGGTGTTTGGCAGCTGGATACCCGAGATCACGGAGCTCCGCGGAACCGCAGCAAGTACGGTG  
GCCAGTACAAGCGCGAGCGGTGACGAGGTACCCCCAGATTACAAATCCGCGCGGTTCATCACGCCCTCGCGGATAATA  
TCTCTCTCACTCTCCAATTA  
>locus0995  
AGGGCCGCGGAAAAAGGAAGAAACGGGAGGGGAGGCACGATAACCCGCGCAAGCGCGGTGTAACATTTGCAATGGAT  
TTGGAGCTATTCAAACGGTTAAATCTCTTAAGAAATTTGGTTTGTATAGGGCGGTGCTGCCGCGACCCCTGATTCTTTC  
TCCTCTGCTCTCTCGCT  
>locus0996  
GCGCGGGTACGCGCGGAGTGGTGGAAAGGCCGCGAGGAGGGGAGAGTGTATGCTCTCTGCTCGGGTTCAGTGGCGA  
AAGATACATGTAAGTTGACCCCGCCCTCGGGACCTCTCTCTGGACGCTTATGAATATTAATTTCTGGGCTCCATCCCCAC  
CCGCTCCGCGCTCATC  
>locus0997  
TTTCTCTGCTCTCGCGCTCCAGATCCACATGAGAACACACACCGCGCACAAAGCCCTCCAGTGCACCGTCTGCCAGA  
AGCCCTCACCAAGGGCAATCTCAAGTACCACATCATCTGTCAGCGCAATCAGACTAAAGGAAATCTATACGCA  
ATAAAAAGGAAAAAGAA  
>locus0998  
AAGAGGAAAGAAAAGCCCTCGAGGACGGGAAAAATAGAGAAAGAGCCGATGGCAAGGAATGAGAGAGGGCGTCGATGG  
GCGTTTCGCGGTCCCGCGATGATTACAGGCTCCGCGCAAACTGTAACTACTCTCGCGCGCACGCGCGGGCGGATGTAGTA  
TGTGCTCTCTCTATCT  
>locus0999  
TATTAGTGTAGGTTTATGAACTAAACAAAAAGTCAAATCGGAATGTATCACATTAGCCACGAAGATGAGCGAATGT  
CTGGAAGGATTTGTGTCTGCTCAAAGCGCTTTTCCGATATCAGCACAAACCTATCATCAAGAAAGTAAAGCTGCGGT  
ATAACCTAATTCATAAT  
>locus1000  
GTTCTACGACCTCAACCCCAAGACCGCGCCAGGATCAACATGATCTACGAGCAGGCCAAGTGGCAGCTGCTCGCGG  
AGGAGATCGACTGCACCGAGGAGAGATGCTGCTGTCGCGCGCTCCAGGTGAGTTGGCCCGCCCTTAGCTCCCGCC  
CCGCGCAGACTCCAACG  
>locus1001  
CGCTGCACTGGCCGAATCCCGGGGCTGGATTCCCTGGAATCTCTCTCGCGCGGTGAATCCGCGCTAAATAATGCGG  
ATTATCCCGCGCAATTTGTTTATCGAGCGAACAAACAGCAGTGGATATAGCCGGGCGCTGGCGACTATAAAGAC  
GGCAGGAAAGAAAGCA  
>locus1002  
GTCATGATAATGTTAAACAAACAGTGGTGGCTCATCGTTAAAGTATTTTATAGAAGAACATTAGTATTGTCGGCA  
CACATACAGCACTTGGCAATGCTTACTATGAACACAAAGTCAACCTACACCGATTATCTTCAGCACACAAGTTTTTAC  
ATTCAAGAAATCCATGCA  
>locus1003  
CACAGCTGAATTCATAATGAGATAAACATTGGACTCATACTAATACTTGAATATCATCTACTTTTTGTTGTCCTCTA  
GTTCAAGCACCATAATTTCCCGAATCGAAGGTCTCGGTAGGTTCAATGTAATAGCTTGTTCACGATTTTTATTGTT  
CATAATATAATATTGTTG  
>locus1004  
ACAATTTATGCAAGATACCTTTACTGCTATTGTGAGTGAACCTCGGAGGGTGGTGGTGGGTCGCTCGCGTCCGCA  
GACTTTGTTACGACTGTGGTGCAGGTTTGTATGCGTGGAGGTTGAGAAATGTGATAAGCTAGTACTAGAAACATCGCTCGA  
TACTATCGTCAACCGATT  
>locus1005  
CTCTCTCGGGAGGGAGAAACGGGGCTCGCGAGAGAAAAGAGGATAGAGCATATCCACCGCGGTAGTGGCGATGTCCTA  
GCGAAGTACAGCGCGGGAATCGGTTTTCGCTCTCTCTCTCAGACCAAGAGAGCACCAGAGCGGTATAGTA  
GTAGCAGTAGTAGTATGATA  
>locus1006  
GCGCAGGGGAGGAAAACGCGCGTCTGTCGCGACGGCCGCGCGAGAGAGGAGCGGTAAGTGTCTCTGCGGCTCCAGATG  
CGCCCAATATTTAATGATATTAACCTTCTACTTAATGGCCCGGTCGATTTCGAGTGGCAAGAGGCGCGCGCT  
ACACCGGAAACCGGAG  
>locus1007  
AAACGAAAGGAAACCGAATATGATATTGTAGCGCGCGGTAACCGCGCACCGCGAGTGTGCGAAAAGCTATTGTCGGT  
CTCTTTGAATTTAAAGTCAACGATCGATAGTAAAGTGGAGGAGGAGTACAGCGAGCGATGCGCTTTGGCCATA  
CATTTTCGAGCGCTCTCT  
>locus1008  
AATCTTAACCTAAGTCTTTGATCGTAGTAAAGTTCGTAAGTTTAGGGTGACAAGCTGTGAACTCACTTTTTCAAAGG  
CACTGTTCCTGGGCGCCCTGCCCTGCGCGCTTTCGGCGCTCTGTTACCCGCGCAGGTCAACATGTTATACGCTGAAAGCA  
GTTCTATAATATTACAA  
>locus1009  
ACTTAAATGTTCTCTGTTTACATTGCTTAAAGAAAATTTATGTCGCGATAATATGGTGGGTCGCTAGCGAAAACCTAA  
ACAGGAGTGCAGTACGAGTGTAGTCTTAAGCAATCTCGAGGCAAGCTTCGCGCTAATATCACGTTTCGAGTCCATTGCG  
CATCAATATCTTTGTT  
>locus1010  
GTGACGTCGAGAGCGTATAATATACCGGCTGCGCGGAGATCGGCGCGCGGATTTCAGCGCAGCGATGTGGGTGTA  
CCTGGTTCCGAGAGTTTCACTTCTGTACGCGCGCGGACGCGCGCTGCATACGAGGTTGGCGCGCAAAGGAGGA  
TCCGACCCCGCGCGCG  
>locus1011  
CGCTGCTGGAAGGAGAGGATCGAGCTTTCGGGGGAAAGCAGCTCTCGCCAAATATCGGCTAATTTGCACAAACAATA  
AAGCTTATCTCCGATTTGCATGTGTTGAACTCGAGTGAATTTGCTGCTCGCGGACGTTCCGCGCTTTCCTCTTA  
TCCGTTCCGAAATGTA  
>locus1012  
CGCGAATACGGAACCGGACCGCGCGCAGTTATAGAGTGGGTCTGCCCGTTACCAAAATCGCTATGGCGTAACATTTT  
GCTTATTCAGCTTCGATTATACAAATCCGGCACACTTTTACTCGCGCGCGGTGGTCTGAGTTCGAGTTCCTCGGCATT  
GTGATGTTGCGGATTA  
>locus1013  
AATTAACCAATTACCGCGAGAGGAAATGGAGGCGCTGCGGAGGTTGCGTAAAGTAAATGGATTTCGCGGATTTCTT  
AAAACGATAAATACGAGTATTAAGCGCCAGCCAGCGCGCTCTTCGACGCTTCTGCTATTACGGGCGGTTTCGTTAGGA  
TGCGATTCCCGTAGTGG  
>locus1014  
AACTGATAATGTATCGTTATGTGAACGTGCAAGAAGTTTCAAAATATAAACAGCACACTGAGCAAATTTGACACAAAA  
CGGAACGAACTTTGATCGAAGACAGCTTGGAAATGTACCAAGAAATAGATAAACAGCTTTATTTTTTTGTTTATAGC  
AAGGAATATTTTCAATTA  
>locus1015  
TTGTAAGCATATAACGATAATCTCTATGCGAGAGAGATACATGACACACCTACACATGCAAAACACTGTTTATTGCAATAT  
AAATGTGATATAGGAAGTAAATGTTATCATAGAATATATGAATGAATAAGATTACGACAAAAACTTACGTGAGACCGG  
CTGAATTAGCGGGTACG  
>locus1016  
TTTGAAGTTAAAGATGTGAGACTGTTATTAATAATGATAATGGCAATCCCATATTAAGGCCAACCCCAAAAGTGGGGT  
GGCGGGGGTAGGCCCATACCACTCCAGATGAATTAATGGACCTTGATTTAATGATTGATTGTTGTTTACGTAGAGTA  
TGTGATTTCTGTTGTAGAG  
>locus1017  
CTCTCCGACGAACGACCGGTGCGCGAGCTCGTGGGGCTTATGACACAACCGCTCGCGCGGACGAAAAGTAAAGT  
AAGCCAGTGGTATAATAGAACTTTCACTACGAAAGTTCAACGTCCTCGTCTACTCGCGCTCCGCGACTCTCACTCC  
CGTTGCTACCACTGCT  
>locus1018  
AACATGTGAACAGATTAATAAATTTTGGTTTGTCTTATAAATGGGAAAAATATATGTAATGTTGCGTGTACCTGT  
AGGAACTTTGGACTACGATTTATGCTGCGGCAATCGTGCATGAGATAAATCTAGCGTTGAGGCGGTGTCCTTACGCGAGC

AACACATCATCAACAAC  
>locus1019  
GACGATTCAAATTTCTGTAATAAATCCCCCGTTTACTGAATAGAATGTATGACTCACAGTTAGATGAGGAGCGAGAA  
AGGCTGTGTAATATACCGAAGGTGAGATGCCCTGATGATATCGACTGTTGATAGATTATGTCGAGGATATATATATAGC  
AATTTATCCATTTGAT  
>locus1020  
ACTTGTGAGAAAATAAAATTCATACCTTGTTGTTGAAATCTGTACAGTCCGGGACGTCGAGTCTTCTCTTCTGCTAG  
AAGATCCAAAGAACTCCATTTAGCTAATGACGAGTTATCTTGGAGTTCAAATTTCTGTGTGATCAGAAATGTCAACCT  
GCTTTTATCTGACTTT  
>locus1021  
CAGTCCGCGAGGCAAGCCGGAAGGAGAGGAGGCCAGCGGAAGCAGCGGTTGTCCTGACTGCACGGTGGATCGCCAGCAGGGC  
AGAGGCTCGAACGCATGTAGGAACATGGCCTCATCCAGCCCTGCTCCCATAGAGGTGAGCCAAAGAGTCGAGAGCCT  
CTCGACTCTGCACCTCG  
>locus1022  
ATTTATGACATTTAGAAACTCGTTAAAAAGTTGAAGCAAGCTCGGGCGAGCTGAGCGGCGACGTTGAATCGGGATTATAA  
AAGTTTGATAAGGCGATAAATAAATATCCCGAACTCATCGCCGCGTGCAGCCCGCTAGATATCGCTCGCTCGGTTTAACT  
TAACCTTTAAATTTGTC  
>locus1023  
ATACACGCTATGTACACGTCGGCGTGGCTGTGTGCACAGGCACTTCTAGCTTCCATCAGCGGAGTAATTAATTTTAAAT  
GTACTTTGCTGCTTATTTCTTCTGATCATGGCTTTCTTTTTTCCCGTTACCCCGTCCCTCGCGGAGAGGGAAGGA  
GCGCAGGAGCCGTACAC  
>locus1024  
TCTCGCTCTCACACTCTGTCTCTGTTGTGGCTGCGACGACGATGGGGGTATAGCGCGAGACTTACAAGCTGGAGGGA  
TGGCCAAAGACAAGGGCTTCCCGCCCTTGTGAGAAAGCTGGAGGTACAGATTGACGTTTGTGGACCGTCTAATAATCCG  
CCCGTATGGGACCAAAAT  
>locus1025  
GCTTGTCTCAAGCGATTTTTCTTTCTTAAATTTCTATCACATTTCTTTGAGAATAAAATTTTGGCTACCCCGTCAAAT  
ATGTCATGACCTCGCTCCACCCTAGAAAAAGGATTAACAATGCATTATACATATGCGCCGCTTCTATGTTGGTTAT  
ACTTTATAAAGTTAAT  
>locus1026  
CTGTTGGCCGAGCCGGTGTGCTTCTGCTCACGTTGTAGCCAAAAGCTTGAATAACTCATCTGTCGGGAGATACTGTG  
ACGGTGGCCCTTCTGCTGTGACAGTAGGGTCAAGTTGAATGATCGAAGTGCCTGTCTGGGGATGAGAAGGATCGTTGCT  
GCTGGAGCTGTGACGG  
>locus1027  
TCTTTAGAACCTAGAGATCGAATCGAATGAAAAAGCTGGGTGAAAGTATAGAGACAGTAGAAATGTTATAAAATGAAAT  
GCTCTTTACCTTTGTAACCTGTGTACATTTAACATCGAGGCGATGATCCTTTTTTCCAAACATGAGCCGTACTACTTT  
GTTTTTCGTTTCTCTTTTT  
>locus1028  
AAAAAAGAAATCTTTCGGGCTGGTGGTATTTTGCAGCTATGCTACTTACCTACGCTCTCAAATGAGTCTCGGCTGAAG  
TCTCTGACATGCTCTACTATAACAGCATTATAAATCAATATCGATTCTATCTACTTTGATAAATGCATTTTTTT  
CAAGAGCTTACTGTACT  
>locus1029  
CAGGAGCATCCAGCCGAGATGAGCATCGACAGGGTGTCCATTTGTCGCGTCCGGGACGAGTCAAACTGCATATCAGAT  
CGTCCACCGCTCGGCCAAGTCCGCATATTTGCCCATCTCTGCCAGCAAGTCCAAATGGACGCCCTGAGCATTCTT  
CGGCTATTTTACCCCG  
>locus1030  
GCGAATTCCTGAACATCGAACCTGCCTCCATGAACAAAATCCACTTAAACCCTAAATGAACAATGTACACAATCGCCT  
GCTACTACAGGACTAGTTGTGACCTACAGTAAGTCTTCCAAACCTAATTTTACTTTCCATCAAACCTATATGATAG  
ATTACTAGCTTGTCTTT  
>locus1031  
AATGCTGTGCAAGGAGATTAACAAACAGAACAGGCTAACGCATATCGTATTATTTCTAGCTAAGTGCATTTAAATTA  
GATAGAAATTCATTTAACGAAACATGCCGAGATGATGAGTCACTATCCCGCCGGATTTGAATAAATGTACGTATA  
CCTATATTCCTGCACGG  
>locus1032  
TTCCGAAGTTAGCCCTCGCGCATCGGCTGTACGAGCTGCCAGAGTGGCGGACAGATAACTATTAATTTACTTCCAA  
GAATCGTAAATATACGATGAACTTTAAATTTGGATATTTTATCGAGCCGGCATCTCGAGCGGGAGCCGACTTTCCGCT  
TCGGCTGGCCCGCTT  
>locus1033  
GTCCTTGCAGAACGAAGTCTGTGTTTTACCTGCAGTAGTTCGCAACATGTACTGGCCGAAAGCAGCTCCTTGCAGTTAC  
CACCCCTGCAGTGGGACACAACTTATCTATATACCACATAATCTCGTCAAGATTTACGTGCAAACTAAACTTTCCCAT  
CTATCGCGCGAGCAGTG  
>locus1034  
ACCTCCTTGGCATTGACCAAGTGTCTCGCTCCCAAGTTACTGAAACGAACCTCCAGGAGCCAGCAGCTAAACGGCGTT  
CCAACCTTCCGGAATCGATTGTCTCGCAACCTGACACAGGCTGATAGCCGGGATTTACTGTAGCCCTTGATGACGA  
CGAGTGAAGACCGGCG  
>locus1035  
CGGAAATCCCGACTGATACATGATGAATTCAAAGTAATAAGAACAAATGTCGTTTGTACAGCTGTGTGATGATGA  
AATGTAACCATCATCTACAGCTCAGTAAGTAATCTGAGTACTGCATGCGAGCATTGTAATGTTGTAATTTCAATGTT  
TTACGTTTGTACTACT  
>locus1036  
GTCCCGCTTGTACAAGGCTCTCTCCAACCTCTCGCTGTATAATAACAAGCCGCTTGGGCTCGCGATAATACGTAG  
ATGATAATCGGATATTAATATCGCATTTGAAAGGGCGCACACATGCTGCAAGCGGCCATTTGTCACGCGGAAACATT  
GCAGCCCTCTCTCTCG  
>locus1037  
AGAGAGAAAGAGAGCTCGGAGAAAAGTTTTACTACGTTGGTGAAGCGTCCGCTCGCGGTAGCCGAGAGATGGGATTG  
CGGATAGCCCGCTGTGAAATAAGAAATTAATCTGATAGGCTCATTTGCCCTGAGCCGCTACGTATATGATATAG  
CCTGGCTCTGCTATCTG  
>locus1038  
TTGTTCAAACACCGTTTTTCAAATTCCTCTCTTGGTACAATATTCCTTACTACTATAACCATAGCTACCAATTTTTT  
TAATTTGATGTAACATAAACTTTGCTCTTTGACTTTTGTAGGTGATAAATTCATGTTATTTACAGAAATGGCTCCTCT  
GCAATGAACTCATAATGTA  
>locus1039  
AACCGAAAGGGAAGTAGGATAGTGAAGTTGGCGGGTATGTCGCCCTGTGAATGGTTGAAATGGAAGCAATAGGGA  
TCAACTAGTATGAAATCGCATGTAATATCGCTCACTACTCGCTCAAAGAGTCTCTGTTCTCTCTGCTTTTCC  
ACTTGCAGCCATCGCCA  
>locus1040  
GCTTTTAAAGCTCGCTCCGAGCTATATGGGACTTTCTCTCGCTTTTCCCGAGCCATCGGAAAGCAATATATCGAT  
GTTTAGCAACCAATAAAGCGATCCCTCAAAGAGAGCTTTTACGAGTAAAGCGAAAGCTCGCCTCTCTATTGACGCGATT  
TTCGCGGACTGTCTGT  
>locus1041  
TTTGGCAGTGCACGCTCGCGGGTTTGAAGGAGTCAACAGTATTTGTAATAAATGCTTGAATAATGCATGAATATT  
TGTTTTAATGCTTCTCTTATTTCTCTTCTCGAAAGAGAAAGCCTTACCCTCTCTGATCTAGTACCATC  
AGCTATATGAGAACTTT  
>locus1042  
GTCCGGCTGCCGGTCTACCAAGCCAGCCGCAACGACCTACCGAGCTCATGACGCTCCAGCAGCCCTCTGTCGCTG  
TGTATGTGAGTACACTGGAACACCAACCCCTACCCGGTCCCAAACTCGAGTCACTGCTGTTGTAGGCGCGGTGCAAAAT  
TCGATACAAAGCCAGCC  
>locus1043  
COGTGATCGTAGTGTGTAGTGTAGTACGAAAGCCAGTAATCTTTTTATCGTACCCTGCTGCTGTTCTATTTCTCT  
CTTTTAGCAGCCTATCGCAGCTATCCAGGTGCAAAATATACTTATAGACCAATATACCAAAATCACCAGATCGCGGGT  
ACCTAGAACTGTATAAA  
>locus1044  
TGTTGACGGGTTCCGTTTGCAGTAGGCTGGTGCACAGTCTGTTGGTGTGTTGAGCAACAGCGGCACTGGAAGTTGGCC

CTGAACGCAGAGCCCCCGTGGCTTTGCTAGCACCCCTAACAGAGAATTCGTATCACCTCGCCTCCACACGACTCTCATCA  
TTTTAATTGACAGCTGC  
>locus1045  
ACTATATACTACCAAGAGACCAGGAGCGATACGAAAATTCGCCGAGCCGATCATAGTCCCGACGATTAGAGCCACCCCA  
CTGACAGTCCCACCCCTCTCTTGAGGTGAACAGGTCGCTCTCTGGTCCCTGCCCTCCAGCCCTCGGCACCCCTCC  
ACTCCCGTCTTGGTCAT  
>locus1046  
CCTGGCAGGCTACCTCAGCCCCAAGCGACTCGGCGCTTCGGCGGCCGATCCACCATCCGACCCGCCCTCAGGTACA  
TCCACTGTCCGCACTATCCAGGTACTACTCGCTCTACTCGCTTACCACACAGACTGAAAGAACAGAGAAACCAGC  
CAATCTCGTATATATA  
>locus1047  
TCGTACAATACAGCTACGAGAGTGTAAACCAACCGAAACGTTGCATATTATTGCAGATGCGCAGGAACCTCAGCAACAG  
TTAGAGCGAGCCTAAATACCCAGTTACCAAACTTTAAGGGAAGAAAGTCTAGTTCATTGATGAATCTGTCCGGTAA  
GAGCACCCAGTACTTG  
>locus1048  
TGCCGGGAAATTAAGGCAAATTCGCGGAGGCGCTCGGCCGACGTCGAGGCTCGCGCAGCTCTCCGTAATAATCGATATG  
CAAACTACCGCAAAATCTAGTAATCTCGCGCGCTCTAGCCTCGTACACACTACTCGCTCTCCCTCCCGCTATATA  
TAACGCCGTATAGTCCC  
>locus1049  
GCCGTAAGTCGCCCTGCAGTCAGTATGACAAGAAATTCCTCGCAAGGCGCCAGCGAAGCGAATAATCTCATCGT  
TCTGATTGAGTTAAATTAATAGATAAATTAAGTCTCCGCAACAGCGAAGCAGCAACCTCTGCATCCTTGTACTCTTTAT  
TCTCCCTCTCTTCTGCTC  
>locus1050  
ATAAACAGTGGCGTTTGAAGCTCAATAATGTATCCGTGTGTCGAGAGTGTGCTAATCGGTTAATTTGTCTTGTCTGT  
TGTGTCTCAGCAAGAGCAGCAGGCTTGAATCCACCGAGTCCATGACACCGCATGATTAGTGACGATAAATATCGCC  
CGCCAGTCCGCCCTGG  
>locus1051  
CTGTTATTTTCCAGGAGTTCGCATGCAATGGGACTGTAATTTGACACCCGAGTACGGGGAGGTGTGACAGTGCAGGG  
GGACCAGCGAGAAATATATGCCAGTGGCTAACAAAATCTGGTCTGGCGAAACCTGACCAACTGAAGTTACAGGTTTCT  
AACTGACAAAACAGACA  
>locus1052  
ATAATAATTTACACTTTCAGAGGAGCTCTACTAATACTCACTAATTTCTTCTGTTCTTTGACGCGATTACAGCTTCATT  
CATGACAGCCATTACATGATGATGATGATGATGATGATGATGATGATGATGATGATGATGATGATGATGATGATGATGAT  
GATTTATTTCTGATCTT  
>locus1053  
TCCCTTGGGTTCCACGCGCTGGTCCCAAGCTCAGCTGTAACATGATGCTGCTGAGCTTTCCGCCCTGAGACAGCGATGCTC  
TCGTTCTCAGCTGCTCCGTGCTGTAACCCAGCGCGCTTCAAAACGAAATTCGAATCGCAGCTTGTATTATGGTAGGT  
ATTGACATTTCACTAGC  
>locus1054  
CCCCGACTGTACCGCCGGGAGTCTCGACGACTGTCTGGGCGACTGTACCACCTACTGTTGTTAGGGGGGAGACTAGG  
GGTGGTATATGATCGTGTATATACGCCCGCGGAAAGTATTGTGCGCGAGCTCCACTCTGGGTTTTCGGTAAAAAATC  
GTTGGCCGGTGGACC  
>locus1055  
TACAACCGCTTGCACAGTACATCTTACGCTAGATCTCCTTACAAATATTACTTCATTTACTCTATTAATTATATCAA  
TACTGTTGACGGATAGAGATTCACTACAGCTCCGACCCAGAGCGTTCGGATAAAATCGTCCCTGCCCGTGTGACGATA  
TTCTCTTATTTTCTT  
>locus1056  
AATAGCCCGCAAAAGTCAACGCTCAACTGACGTGAAAAATCACGTCTCTCTCTGCTCTTCTCCTCCTAGGTGATAGTCT  
CGTCTCCCGGTTACCTAGCAGCGAGGATTCAGCAGCTATCAGGAGTCAAGTAAAGTACGCGCGAGTACCCGGCTACT  
ACGACTACGGCCACGAC  
>locus1057  
ATTGAATAAAGCTGCCCGCGTCCCGGTTCCCTGAGACCTAACTGTGACGTCGCGTACGATATCTCACAGGCTAG  
ATTCCTGGTATTGGCGATGAGTGCCTTTGACAGATCAAAAGTCACTCTTACATCATTATTTCTTACCTAAAGAC  
GCATAATTAGAAATGTT  
>locus1058  
AAATGTCAATAATCAGCTACTTGTATGACACTAACCCGTAGATCCGAACTTGTGGGCTTTTTTATATGCATACCCGAAGCT  
CCTATCTACCGGTACATGATGATGATGATGATGATGATGATGATGATGATGATGATGATGATGATGATGATGATGATGAT  
ATTCAATCAATTTGA  
>locus1059  
GCGCGGGTGGAAAAAGCTAAAGGTAGAGAGCTGTGCTATCGTTTTGGTCTACTCTTTATTTATTGTCTCTAGTGGTA  
CGGACTCGAGATTAGCCGAGGATGATGACCTTCCCGGGACCAAAAGTGAAGTACTGTCCTTGAATCAGTGTCTGCC  
GTCCCTGTCTCTCTG  
>locus1060  
CAAGATGGACAACCTGAACCCATACAAAAGCTGCAAGATCTTGTCAATAAAACAACATGAAAAAATGCTGTTTTTCTGG  
AGATGGAAATATGTTTGTGCTGGATCTGCTAGACAGCTGCTTTATATATATGGAAAAAAGTGTAGGAAATTTGCAAA  
AAATTTGCATGGTACAAAG  
>locus1061  
GACGTTGATAAAGAGCTTACTACGCTGAGCCAGTCCGCTCGGACCGCAAAAGCGCAATAATCGCTTATTGATTAAC  
GTTTGTACTGCGCAAGTCCAGTTAACTACGGCTAATCTCTGATTGCAACGCCAGCGACTAGCGCGTGGCTCTCTC  
CTCCTCTCATTCGCACC  
>locus1062  
CGAGGAAGCTCACCACGACCATGGATTACCCGAACCGCAGAGCACCAACTCGACCATCACCAGTGTCAACAGCATC  
AGCAGTTTGTCAAGGAGAACTCCAGTGACTATACCCCGCGCTGAGGAGCAGCAAGAACGACAGAACTGCTGATTA  
CAGGTTATATGTTGGTTT  
>locus1063  
GTGGGGGCGAGTGAAGGCTGCTCTCTGTTTTTTCGAGGAGTTAAGGGGGATCAGGAGTCAATCCAATTGAACAC  
CTCGTACATGGACGAGGACATCTCATATCTGTA AAAACAATTCGGCCGACAGCCTCGATGTCAGAACTTTCCCTCGT  
CTTTGCTTTTTTGTGTT  
>locus1064  
GTAAGAGGAATGTATCGGGGCAAGGGATAGCAGTCTACCTTGAAGAGCTGAACGCCAACGACGGCGAACACGAACTG  
CAGGAGGCTGTTGACGAGGACTATGTTTCCGATAGTCTTTACGGCTACGATGACGATTGTACTACGTGCTAAGGGCGCC  
ATATGCAACATTTCACT  
>locus1065  
GCTTCGTCGATGTTACCTTCGGTTTTGATTTCGAGCGATGTCCTACCACCGCAAACTGTGCAATTGAACAGCACCGT  
ACCGTCCGCTTCAATGGCATGTTCTACGACACGAGCTCTGCGAATTTCCCGATTACCGCGTTAATCAATCAGTAG  
GACGTTTAAATGGATGAG  
>locus1066  
GCTCGCGGGCGGACCCAAAAATCCGACGAGCGAAACGAATCGAAACGAGAGCAGATCGAAGGCCCATAAAGTACGTTAT  
CGAATTAGCGCGTTAAGCCCAATGCGTTAGTCTGCTGAGTGACGTTCAATGCCCGCTCCCGGGAAATGAACGAGAGGAC  
GAAATGACGAGGAGGGA  
>locus1067  
ACCCACCCGTAATACTTGGGGCCGATCGCTGTAGTCTACCGGCTGACACCTTAGAGAATAGTCCCGCTCAGCCATCCGG  
ACATTCCTATCTGCAACCAACACC GCCCAAAGGCCATCGTACCGAGATCAGAAATAATCGCAATCGAGGCAATTTGACAG  
AGAAATAACAAGGTCAA  
>locus1068  
AGAGAAGAGAGGAAAGGAATGAATCACCAGCGGTGCCTACGATGAACTTTGTACGAAGATCGGTGGCTGTGTTGACG  
AGTTAGCGAGCCATGCTCACCCTGCTGCCAAAATACCGCAAATGTATATACGATTTTTCTTTTTTACATTCATTTA  
CCAATAAATCGATTTTT  
>locus1069  
TACATCTCGGTGAAAAAATAGTCAAAATCCGGAAACGGCTGTGCAAAAACTTGACCCGCCGGAAATCGAACCAGGGTC  
GCAAGAATGGAACTTGCATGATACCACTACACCAGCGGTGCTCTCGCAAAAGTAAGCCGCACTTGCAGGATCAAAATG  
AGGAGCATCGCTAAAAAT  
>locus1070



```
CGAGGCAGGCGCGGGGCTTCTAATTGAAAACTAAAGCCCGGAGGCGAGCGGCGCGAGCTTGCCTAATTGCAAT  
TAAACAACGCGCATTAATAGAAATACAGATGCCTTACAATGAGATAAGTAAATAAAATGAAAGTTTTAATTACTTTGCC  
TGACGCGCTCGGCTCT  
>locus1071  
CCTGCGTGTATCTCTGTCGCGGCGAGAGCTCCTGCTGCTGCTGCGGCTTAAATCCAGCGGGACGCTGACGCTCATATTG  
CATAAACAATTAATCAACGCGGATACAGCTAGGCTAGAGATTTGCGCGGGGCGCGAGACAGAGAAGAGCAGAGAGCGG  
ATGAGGCAGAGGAGATGTATATATATAGAGTGGGAAAGCCGATAAATTTTCCAGCGGCACTTAAAGTGCCACTAGT  
TAAACGCTAAGCGATTTAAAAAGCGTTAATATCCCGAATGTTATACTTGTAGGCGTTATATAACGCGCGGAGAGCTCG  
TA  
>locus1072  
CAGGGCTTAACTCGCGCCAACGCATCGAGTAAAGGGGAGCTCGTCTTTTATTTGCTGATTGCGTTCCGATTTGTTTC  
GTGATTTAGCATAAATGTTTATTAGATTGAGATTCAGAGAGCTGCGAGTTCGGCGATTGTTGCGCCGAGTATGGGCGTC  
GAGTTCGAGAAATCGAAGCG  
>locus1073  
CTCGAGGGTTCGTCGGCTGCGAGGCGAGCGGCGGTGTAACTTTAAATTCGCGTGTCCCGGCCAACCAATCTGTGT  
CGTGCGGCTCTCTTACTCTGTAAAGTAAATTTTATTTGCAAAGCGGGGATGCCATCACCGCACTTTCTCTC  
TTTCGCGTGGCTTTTT  
>locus1074  
GACACGAGCTACGCTAAACTACATGGACAGCGGTAAGATTTATGATGTTGATGATGACGATGATGCACAACCTTATT  
ACCTCATTCAATACGGTTAAAGATTAAAAATAATGATGATGATGATGAGGCGTAAACAAGTCTGCGAGGATT  
AAGCTATAGCTCAATA  
>locus1075  
AGTGCCGCTGCCTAGTAATTTTCATTTGGTTCCTTCGAAAAGCGGCGCCGCTCGGTAATTTGGTTAAATTTGCAATC  
CTGCCAATCAATCGTAAATATCAAGGACCCCGTCGCAATAACCTTCGCTCTCGGCGCTCTCTTCTTTCTTTCCGCT  
TTTCATTCCTTTATGGCA  
>locus1076  
CGACAAGCCCTACAAGTGCAGATCTGCCCGAAACAGTTCAACCACAAGACCGACTCAGGCGGCACATGTCCTCCACA  
CGGCGAAAAGCCTGAGCTGTGATAAATGGCGAAAGGCTTCATACGCAAGACCACATGATGAAACACCTCGAGAGC  
CACAAAGAAAAGTCCAA  
>locus1077  
CCTCACCATCATCTCTACACCCGAGCTCCCTACACGCCAGCGTGGCAGGCTCGCCGACCCCTGCTGAAGAGTGGACA  
CTTGAGGCGAGCCCTCCCGCCGACACCTCGTGGCAGACGCGTAACTTTTTTGGTTCGTACTCAACGAGCCACC  
CCAACCTACCCCTCTA  
>locus1078  
TAAACAATTTCCGATTCGAGGCGAGTGCATCGAGCTACATCGCTCTCGCTCGTGCATATAGTATCGACAACC  
GATATCTGCTCCACATTCGAATAATAGATTCGGCTGCAACGCGAGCAGCGCAGCTAGAGCTTTTTTCGAGGCTCTCAT  
CTCCCTCGTATAGCAAT  
>locus1079  
TCTTGTCTTGGTACAGCGCTGCTGGCTGCTGCCGCAATTAGTACATTCACTATGCCATGCAATTCCTGAACTGCCT  
GATATGATAGGTTGTATGTTGGTAAAGTCCAGCATACAACAATTTAATTTAGAGTCAAATGCCATTATCTTAGAAC  
AATAATACTTTCTTAA  
>locus1080  
GCGGACCTCGTTGGTGTCTGGGTAAGATAACAGGAAGGCTGCGGGTAATAGGCGGCTGGGGAACATACGCTTCATTA  
ACGATCATCTCGTATAATATCTACTTTATCCGAGGCTGACCATATCAGCGTTCGCCAGGCGAACCTGCCCGCGCTG  
AGCCAGCTATGGTGGC  
>locus1081  
CGCGCGCAAAAATAAAAAGGAGCTGCGAGGCGAATGAAAAGCTTCGAGCAAGCGCGGAGCAAAACATCGAGCGTGTA  
TTCGCTCTTTAAAGAACACTTGGACGATAAATACGGGCGTGGTGTCTATAGGTACGCTCAACGCGAGACTAGAGACT  
CGTGTGCTTATATACA  
>locus1082  
TTCATTGCGCCTGGTAAAACAGACGAGTCTGTCACACGAGCATCGTTGGCGGTACAGGTAAGAAAAGCCGCCAGACT  
TGTGTGCTGGTACTGCGCGGTTGTAAGTCTGCTTATGTTTAAACAAAAGAAACAACACTGTTCCACCCATTGCACA  
GTTCCATATGAAATGT  
>locus1083  
CCATCAGCACAAAGCAAGCGCTGTAGGAAATTGCTGTTGCGGCAGAGTTCGAGCGAGACGCGCCCTAAGTGAAGGATG  
CGGCAACGAGCTTACGGGTTGACGAGCTATTACAGGCGGTTTGCATATATAGACGCAACCAGCTGGCAGTGGCCG  
CGCGTTGTTGGCCGACGGGA  
>locus1084  
ATATTCAAATCGACAACCCTTTGGCGCTTGGCGGCTGAAAGGACTCGGAGTACGTTCCGCGCCCGACCCCTCGATCGG  
ATTCAATGGGCATCGATATCAAATTTATTTGACGAAGGTCGCCCTACTGACAGAGTGCCTTTTTCCCTATTCTGTTTTT  
CCCATCCTTCTTTCAA  
>locus1085  
GCGCAATATGGCTTCGAGCTCGGATGGAATTCGGCAACTCTCTTACCTGAATAAATTCTTAAAGCTCCGCTAGCCGG  
ATGTAATCGCGACAGCTACTGTTGTTGGAATCCAGCTTGACTGTGTAGCCACTGAGCCGAACGAATCAAACGCG  
CTGCAGAGATGGCTGC  
>locus1086  
CATGCATCCAGAGATGATAGTAGACCCGTCGCGCTGGCGCGGTAGTGGCAGAGCTCTCGCAAGATCTATGGATT  
TATGCAATGACAGGCGTTAGAGTCCGAACAGCCGGAACCGCCCTCTCTCTACCCTCTCTGTTGGAATAATGGCT  
TGATAAGATAGGAGAGA  
>locus1087  
AGAATCGCGAAAGTTGGCTCGAACCAACGCGAGTGGGCTGGACTCCGAGAGGCTTATGACTTAAAGTCTCTTAC  
TCCGTTAATTCGAAACATAAACAAGTCTCGCTAAAACCTGCGCAACTTCGCGCCTCTCTGGGAGCGGCCCTGTGCC  
CGGACTGTTAATGAAA  
>locus1088  
CAGGACAACTGTCCCCGATCGTCTTGCATCGCGCTAACCATCTCTCCTCTCACTGCGCGCTCTATGTAATGGA  
GGCCCAATCATGGGTAACTAGCCACCCAGGGATACTCTGCTGGCAGCGGTACGCTCCCGCAATGTGTACTTAC  
GTTTCGCGTGCCTCCC  
>locus1089  
AAGGGGTGAAAAGGGGTAGAACAGCGGAATGGAAAGCAGAGAGCTGCGCGGGGAGGAGATCGATGGCGATTTTTCA  
CTCACTTAGCTCGCGGCAATCAATATGCATTAAGCCGATCGGTTCCCTCTCTCTCTCTCTCTCTTTGGCCTTTAGGTTTC  
GCTCGGAGGAGGCATC  
>locus1090  
CAGCTATATACTGCAGCTAGCTACGCGCAGGGCTATAGGTTCTCTCGACGCGCGGAGCGGCTCACATCACATT  
CTAGGCTATTCCGATTCGTGTTCCCCACTCGGATAGCTCTCCAAATTCCTCATGACCACCTGGATCGGCGAGCGGAGAG  
AGGCTGGAAAAGCCGAG  
>locus1091  
ATTCCGCGGACTGCGCGGTAAGAAATACAGCAGCGGGAAATGCTGTACTGCTGCCCGCCATATTAACATTCTC  
CGGATTCGAGGCGAGATTAATTTACAGGAGGATTTGCGAGTGGTTTGGCAAAACAGCGGCTCGCGCGCGGACT  
CCCCACTCCTCGTGTCT  
>locus1092  
AGCATACATACAGGGGTTGGTACGGCAGCAGCAGCTCTCGAGTGTATGGCGCAGCCGATAACGGTAATCCAAT  
TTTTGGAAATAATTTGCTTGAAGATCGACGACGACCGCGGGCGGCGGAGCGCTTTGGCGTTTTCTCTCTATCTGA  
CACCTTATCGGAGCATC  
>locus1093  
AACTCACATTTTTCCGAGGTTGATACGCGGCAAGCGAAATTTGGAAAACGAAATTCAGACTCAACATGAAA  
ACCAATGAACCTTGATTCGAGGTTGGCGCTCCGATGTAATTCAGCGTGTGTCCAGCCAGCGCTCTCCTCGCCGAGCGCC  
TCCCGCGGCTGCGAC  
>locus1094  
ATGTGAAAAGGGGAGGAACTTACAATAATTAATACGATATTTCGTTATTAATAATTAGATATCTATTAATAATACGA  
GATCACAGTACGCTTTGAGCGCGCGGATCTCAGGTGGCGGGCTGACTTTTATTTTCGATTTTTCTCTTTCTCTCTAT  
TACGTTTACTTATTGATTC  
>locus1095  
GGCAAAGGCGAGAGAAGAGAGTAGTGTGTGCTGGCAGGCGGCGCGGGGCTATTAGCAATTCAAAATGGCG
```



CGCCCGGTCCACCCCGGAGCCACGCGGTGGCACAGCATCTGCCCATCCCGGTTCCCGGTTTCATAATATCCTGCACG  
TCAGACTTTGAAAACCTCAACAATTTCTCTCTGCCTTGGCGGCGCGGTGGCGGCGCAGGAAAGCCGGACGCGGGGTGCC  
GGCGGAGGAGCTCGGAA  
>locus1122  
CATTAGCGCGTTATAGCAGCGAGCGGTGAGAACTGCGCGCGCGCGGCGGAGTTCCTCGCAAGTTTGTGTGTGAG  
AAAAAGGACTGATTTGAATTTATATTACTTGTCTCTCGGCCCTTCGCGCAGAGGCGCGCAGCAGCCCGCGTAAGGC  
GGGAGCAAGTAGAGAG  
>locus1123  
TATAGGCGCGGCATAAATCCTGCGCGGAGTCTCGAAGATCCATTACGGGCTCTCGCGCATTCGCTCGAATAAATTTCC  
ATAATATTTGGCAGGTTGACACGCCTCGTCGGAAGATGGAACCCCCCCCCCGACTCGCTCGCCATCTTTTCGCGCG  
CGGATTCATTTTCTCTC  
>locus1124  
GTCTCTGGCAGTACTTGCAGCAACTCAACGGTGCATTTGGCACGCATCTTCTGCCGCGGCGCACTCCCTGCCGTGC  
CCCTCTGTCTCCATCGCATTATCGCAACATCTTATAAATTCACCCTGACTCGCTGCTCGAAACAAGACTCTCT  
CTCTCTCTCTCTCTC  
>locus1125  
TTTTCTGGTACGGGAAGAGGATAGGACTCGGGATTGAGGGACGTGGGGCACTGGCGATAGTCGGCCGGATGGCTTCTAG  
TACCTAGAGTAGCCATTGCAATAGCCATTGCGAGTAGCCGTTGGAACCTTTGAGGAAACGGAGTGTATGCTCCTGGAACA  
GAGATCGTGCAAAACG  
>locus1126  
CCGGACTGTGTGTATGTGTGTGTGGGGGGGGGGGAGGTGCGGTAGGGGATAAGCCAGATGTCGTTGATTAAT  
ACGGTTTACCAGTAAGTGTAAACGGAGTGTCAAAAACGCCAGTAGCACACCGCCATCGCCGAGTTTCTCCCTTCCCGGA  
GGCGGACGAAACCAAC  
>locus1127  
ATAAGCCGCTATAACGATCACACCCGGTTGTTGGCGCTCGGCAATAAACGCAAGATATGTGCAGCCAAAGTGTGTTA  
AGTACTGGCATTAGGGTAATAAGCGTCAAAAGGATGCTGCGTGCAGCCCTGCCTGACACGTGTATATATGTATACCGAG  
TCCGCGTATAAGAGAGAGAG  
>locus1128  
AGAGAGAGAGAGAGAGAGGGTCCGCAATTAAGCATGACCCCTGCCGCGTGGCCCGCGGCAAGTCTTACAAAAAATC  
TAATTTGAAATACTTTTCTCTCTTTTCTCTAAAATAATTTATGAATCCGCGCACAGCACACAATATCTCGCTCGTA  
TGTATATCGCGCGCTGA  
>locus1129  
CAGGGAAGGCGAGCGAGGCTCATGAATATCAGCGAACAAGTGTCCGCTTGTCTGCCAGTACACCTTGTGTTG  
ATCATAAGTGGGTTTGTTCGCTGATTTGTGTGCGCATCGCGCATCGCGAGGGGAAACCGACTTGGGCCAGGGGGTCC  
GTTGAATATGCATCGAG  
>locus1130  
AAGARTCCACTGCGAGCGCGCTCGGAAAAAAGCAAGCGAGAGAGAACCGGCTCGCCACCCCGCTGACTAGTCCGC  
TGATTTGCTGCTGCATTTGATGACCTCATCCAGACAGCGCCGCTGCCGCTGCAGCGAGAGGGTCCGCTGCTGCCCTT  
CGCGCCCGCAACGCG  
>locus1131  
ATGCTCTCTCTCTCTCACTCACAGGAAACCCCTAGCAGCAGCGGTCGCAATAAGGCCGTGCCAGTAGTCTCTCA  
TTTGAATTAATAACCCGCCCAATGAGCCCTGGGTCGCGCGCTGCCTCTGAGTGGCTCTCACTTGAATTAACGACGAG  
CTGCTCCGATGCCACAA  
>locus1132  
AAGAGGAGGAGTGGAGGCTACAGAGAGTTACGGGGGATGTATTGTCCCGCATTTGTCTGCCCTATTGTGTGACATC  
ACGGCCGATAACTGCCGATAAAGACCGCTCGCGCAAAAGTCCGCTCTCGTATACTTTTCTTTGTATATGTGTGCT  
GTGTGTGTATGCATT  
>locus1133  
CGAGGCGCGCACACAGGCAAAAGCGGAGCTTAAAGAGCAGAGCGGTCGCCGCGGCGGGCGGCTTTTGGTGAATGAA  
TATATTGGGGCATCTTTACGCGGACTCGACGGAAGCTAGAAAGCTCATCTGCGGGGGTGTGCTGCACCTGCTCTCT  
ATGGATGGCATTCCGCT  
>locus1134  
CACGTCGAGAGGGGCAAGCGGAGCGGCTCTTTTATTTCCGAAACAATGGAAGGGCGCTTTGTTTCAGGCATTGTGAG  
GGGACAGTAAACCGGCCACAAAAGTTATAATGAAACGCTATTTATTTAAATGCATAGAGGAGCCGCTGCTCGCTCGCT  
CGCGCTACCACTTTTCA  
>locus1135  
ATGCAATTTCGATAGTAGTAACTGTACTAGATCCGCGCTTGTACTCGCATGCACACGCTAGATAATTTCGGAGTCA  
TCGCTAACGCTATCGAGTATCGAGATTCCGACGTGGTCCAAAGCAGTTGATTCTGTAATTTAGCTTAAAGACTCAA  
GTGATCATTTTTTTGCA  
>locus1136  
ATTTCTCGCGGAGAGAGAGAGTAACTCGAAAGCAAGTCCGCGGATGTATATATACTCACTTTAAAAATAGCCTG  
TAGAGTACGGCGCTGAGGCTGTGAAAACAGTCCGGGTTTCTTGGGGCGGGTTCGCTGTTTCGCGCTGGCTCGACA  
TCTCGTCTTCTCTCTT  
>locus1137  
AGAGCGCGCGCGCGGCTGTTGGAAGAGAGAGTAGGAGAAGTAGGGAGAGAGAGAGAGAGGAGGCTCAGGAATGGATC  
GCTGAATTTCTCGAATAATTAAGTATAGACTCGGTGAGCTAGGGTGGCCGCTTACTACCAACGCGGCTCATACATTA  
TGTACCGGCTGGTACAT  
>locus1138  
GACAGCGCTCCATCTGTTTGAATGTAGTGTGTTGTTGTCGCGAGTCTGGAGCGGTCGCGGAGGAGTTGATGGGCG  
TAGGAGATGGAAGCAATATCAGGACCCCTGTACAGCGGCACTCGCAGCACGGAACAACCGCTCAACCGCGACGAGCCAGC  
ATCACCGCAACAGCTTCAA  
>locus1139  
GGGAGAGCGGCGGAGGAGGGGGGAGAGATGCGCGGCAAAATTTCTAATCAGATTACCGTGGATTAGCAAAGTTCGT  
TTGTTCTAATGAATTCGTCTAAATTAACCTCGCGCGGCGGCGCAGCGCGCGGCTTCGAGGAGAGAGAGAGAGGG  
CAAGGACGAGCGGAGG  
>locus1140  
AAAAAACAGTAATTTACTTAGTAAACATAAAGCCGCGCAGCGGCGGCGGCGGCGGCTAGTGAAGGAAGGCAAA  
CACATTAACATTTAGAGGCATAAATACTCGCTATACGCGCGGCTCGCGCGGCTCTATGTATGTGTGCGGTATA  
TATGTTATAGATGTGTA  
>locus1141  
CAGCAGTACCGCGGCTCTCGCGAGGGGACGCGCGAGAGAGCGGAGAGAGAGGTTCTTTTAGACAAGAGGTTGT  
CGCGTACAAAACAGTTAATGAGTCTACGGCTGGTCCAGCCAGGGCTCCGCTTAATAACGTCGAGAGGTAAGTGC  
GAGCGAGAAAAGAAGA  
>locus1142  
CGTTCAATAAACCGCGCGCTTCTCGATATATAGGCTGGCTGGTGGCGAGTATCCGACAGTCTGCAGTTAATTTA  
GAGGCCATTTCTCTGTAAATAGCCAATAAAGCTCGCTTCCCTTTCGAAAGGCCAGAGCGCAGCGAGAGAGGGAGC  
TGTGTATATCCGCGCGC  
>locus1143  
GTAACCGGCTCTCTGTAAATTAACCTAGCAGGACTCTCGCTCGCGCGCTCCCGCCAAATATTCAATTTAAAAAG  
GTAATGCAATTTTCCGCTTTACGTGATGAGATAATGCAGCCGATTACGGCTCTCTCGCTCTCGACTCTCTCTC  
TCTCTCTCTCCCTTT  
>locus1144  
GACAAAACCTCGAATAAACTACTACTCGCCTATTGCTTGGCGACGCAATTAAGTGGACCTGCCTGAGATTAAGGGGA  
ATCATCGAAATTCGTAACCTCGTACAGCTACATAGTAACTACTCTGTCTCTGTCTGCTGCTGCTGCTGCTGCTGCT  
TCAGTCTCTTTGTTCTG  
>locus1145  
TCGAATTCGCCCTCTCTTTAGACCGCGGCGCGGTTTACCCCGCGCGCTAGCTCTCTTACGACAGTCCGAGGAATTC  
GAGTTGCTATAAATCTCCCTTACGCGGCGGATGCCAGGACGCCAGGACAGCTGAGCGTGCAGCGGGGTGTGCTACTCT  
GCTGCTGCTGAGCGCAA  
>locus1146  
CGCATAGTACGCCAGTGCAGCGGAGCGGAGGCTAAAGAGGCAAGAGCGGGAGGGAGGGAGGGAGTGGCGAAACATT  
TGCTTCCCGCGGTAATTAAGACACACAGAGCAGCGGCTCGAGCAGCTCGAGAGATCGAAACTACTACTCTCTAT  
CTTGGCGCGCAATGCA

>locus1147  
ATGTGGTTGTGTATTAATAGTTGGAAGTCAACTAAAGGAAACGCTAATGCGTACCTTTGCGCGTGCACCACCGCGCCC  
ACCACTGTAGCCACCATCGTAACTACCACCGCCATATCCATAGCCATCTGCATTTTCATGGAACATACGGTGCAAAACA  
AAGACAAATTCGTAAG  
>locus1148  
GGCAACGTCCTGAGAGGAACACCGGGAGAGCGAGAGAGAGAGAGAGGAAAGAAAGAGAGAGGAGCCAGCACAGCAGACA  
GACGTATAATTTCCGGGATAAGATCTAAAATATGGGCTCTCTGCGCAGCGCAGCGGGGACTGAAGCTACCCGGAACGC  
GCAAGGGTTGAGAGAG  
>locus1149  
CAGCAGTACGCGTACACGTCGGCGCAAGGGTCCGGCGCACAGTTAGGGCGCGCCGGAACAAAATTCATTTGGCCAAAT  
TAAACAGAGTTTAGCAATTTGCGCTTAATCCATTTGTCGAGAAATCCGCCATCCGTCGCTCTCCGCCACCTGCTGTCT  
CTTCTCCTCTCGCTCTCTT  
>locus1150  
CGAGATCGGTGTATATATACGTAACCTCGCGCGTGGTGGGGCCGGATGCGAAACGGTTCAGTGGCAGCCACCGATA  
ATAAATCATACGATGATACATTTCTATCGCGGAGCGAGCGAGCTGCACCGACGCCCTCTCTTTGCGCAGAGATAGGTAA  
ATCCGAGGTTGAGGAAAC  
>locus1151  
CACCGTCTCGTCGCGATCCCTCGGATAGTCCCTCTTGGAGTTAAATGGCTCAATTATAGGGGTAAGTGGAAAAGTTC  
AAGAGAGAGAGAGAAACATACGTCGAGAGCGAGAAAAAAGATGCGCCGGGTGAAAACAACTTAATGCGGGCACAATA  
TTTAGTATAGTGGTAG  
>locus1152  
TATAGCGCGGGCGCGGCTTGAAGTGGTCCAGGCGTCCCGGGGGCGCGCTTTGTTGGCGGGTAATGGCGTGCC  
GAGAAGAAATGGGAAATGTCACCGAGGGGCAACCTTGACCTTGATTCCTTTTTCTCGCGCGGCACTCGCGAGCGAG  
TATATAATATATAGACT  
>locus1153  
TCCACTTTTGCAGAACTCGTAGTCGCCCGACGACGAGTGGACCAGCAGCAGTGGCGGGCAGTTTGCATTTAA  
ATTTGGTAAATTTGCCGGATTTGGCAATGAGCTCGGGTATGGCGAGCCTCTCGCTCGCATTAATACTACCGCTCTC  
TAGCTCTGCCGACTGAA  
>locus1154  
GGGAGGAGTTATAGAGGAGTTATACAGAAACGAGAGAAAAAGCGAGTAATCGGAATGGATAGACTTTTCTAGAGAC  
AGGCCAAGGAGAAATGGCCATTCATGCAAGAGGAGAGACTTTGGCCGTGGATTATAGGATAGGACCGGAATGTAATACT  
GCTCTCTCTCTCTCT  
>locus1155  
AACACAGCAGCGCACGTATACACGCATACACAGGGTCCGGTTCAGGGTATCATTGCCGGCGCGCGGAAAGAC  
TCACCTAGACCGCTCTGAGTTACCCCTTCGCGCGCGCGGGCTCTCCCCCACTCTATACATCGCTCGATTCTGATGCC  
CGCGCGCGCATGTGT  
>locus1156  
TACACTGGTAGAATAACAAGTTTTTTTTCTTTTACATACGGCTATTATTTCAATATACGGTAGGTAGTAGTAGTGT  
GTCGACACAAATTCATGATTAAGTGGTTTTTTTTCTTTACTGTTTATACTGCTTTACTGTTTAAATGTTAATAAT  
TAATAAGTTTACTTGT  
>locus1157  
AGGAGTTTCAACAGTAGCGGCATTTATCGTCCCGACGACGAGCAGCGGTTGGCGTGGCAATAACGGCACATTAG  
AGGATTTAACGCCAAATCAAAAGCAATCGCCACACCGGAGGAGAGTTAACGAGTTATGCCCTCTTCGCGAAATACCTGC  
ACCTAATATCCCGCAA  
>locus1158  
CGCGCAGACAGCGCGCGCGGTTCTGTGTGAGAAAACGAGCGGGGACAGTGTGCCACGGGCAAAAACTATTGA  
GTTAATCACTAATTTATAAATAAATTCCTGATGACCATACACGAGCGGAGTGCCTCTCTTCTGTTTACCGT  
TCGTTCCCCATCGAGT  
>locus1159  
GTGCGCGCGCGCGGATATGGTCCGTAACCGGAGGCGAGCGGCAATCAGGGCGCAATGCGATTACCTTAAAGAGA  
AATCCGATTAATTTATTCATTCGCCCTAAGTCAAAATCAGTTTAACTAATCGTTTAAATTCGCTCTCTCTCTCTCTCC  
TGCTCTCGCGAGGCTT  
>locus1160  
CAGCAAAAACCTTTGGGACACATTATAGTCATGCCCGAGTAGTGAAGGAGGGGGCCATAATGCACATAGACGTCGTCC  
ACAGACGGAAAGCAATCCCGTAGCATCTAAAACACACCTTTTACTATCGTACACAGAAAAATCTTATAGTTATGAGAGTTA  
GTACGCTAATTAAGTCAAGT  
>locus1161  
TGACGCGCAATGAATTTATGGTTAATACGCGAGTTTCGCGACAGCCTCGCCCTTTTAAAGGCGCTCCATAAATTTCC  
CGATTAAGCGCAATCAAAAGCAATCGCCACACCGTCCACAGGTATACCATGAAATAAATAAATATACAGCCC  
CCCCCCCCCGCGCCC  
>locus1162  
GTTCCAGAGGGCGGTTTATGGGACAGCGCAACGGGTTGGCGGGGATCAAAAATATGGGTGATCAGGGTGGTGGGT  
GAAACCAGCGCTCTTCTCATCAACTCGTCTGTTATCGAGTCATGGTCAACCGTGCAGCGGCAACTCGTCTCGGGCCC  
TCTGGGACAAAGAGAA  
>locus1163  
CACCTGAGGGTGCAGGGTGGCTTTCTGTGTGGTGGTTCGGTAAAGCAGGATTAACCCCGGGGCTTCGCGCCTC  
ATCGTCTGAAAATGCTTACTGCTTACATTTGCTTGGTTCGTCGTCGTCGAAACCCCGCGGATGAATCTCTCTCTCTC  
TGTATACCTATACTCG  
>locus1164  
ATTAACAAGTGTGGTAATTTATAAAACGTAATAATAATTTATGTTTCAATAAATCGTAATAATAATATAATCA  
CCTCTGGCAAAATCTCAGATGGCAAGACGTCGCGACGTAACATTTGACAAATTTCTTATAAATCTTCAATTTCCGCA  
GCTTCCGACAGCCGATC  
>locus1165  
AACGCGCAGAAAGAGATAGAAGTGGTGGCGCTCGCGCGCGCTAGCTCCGACAAAAGCGATTAACTACTTTGAGCAAT  
TTGCTCACAACTCCACTCAGCTCGTAGCCGACACTATCTCGTTTCTGTCGCCCCCGCGCGTTGGCCAAAGCGGTATA  
CACACCTCGGAACGCTG  
>locus1166  
GGCAGCGGAGCAGTAGTAGAGTTCGGTGGCCCGGGGGCGGCTCGCGAGCGCGCGCGCGGCAACTATTATA  
AACTGAGCACCTCGAACTACCGCTCCACTCGTCCCGCGCGCGCGCTTTTCTACCCCTCGTAGCAGCGGCTGCTGC  
TGCGGGCGCGTGTCTG  
>locus1167  
CCGCGCGCGGTTTCCAGAAAGAGAGAGGCTGGATCGCTGTAATTTTTTCTGCCTCGCGTACGCGAGTTTAGCAAG  
GGAATGACCTACGTATATTTCTAAGGGCTTTTTGCGGGGCTACAGCGGTGAGACAGCGGTTATCCGGGCTGCC  
CTTCTCCGCTATACCTA  
>locus1168  
GCTACGCCACAGTTGACCACACCAACTCACAACTCACACTAGTACCGAGCAACAACTACCCGCGCCACCCCACTTAC  
TACCCCTGCAAGATTGCGGGAAGTAACTCTCTAAATCTCTAATCTTAACTCGTCCGTTTATATCCATCTCCGGGAGTT  
TGCAATGTGTATATAC  
>locus1169  
TCAAAGCTCTAGTAGTAGTAGTACAGAGAGGCTATCGGCCCTCTCTCTCTTTCTCTCGGGGTGACCGGCTA  
ACGTGATTTATAAAGTCAATACGTTGCCAACTCATCAGCGACTCCGCCCTCTAACAGGCGGTAATATGACCGGGC  
GGTTACGCTATATCACG  
>locus1170  
ACGAAGAAGAAGAAGCAGAGGAGCTGAGATGGAGATAGTGGGTTATATGAACTCGACCGATCCACAAAACCGCTATTAT  
TATATTAAGTTAATGCAACTACGTCAGTGAATCCCGCGCAGCGGACCGTATCATTAGTATACACCTATTATTGCATTA  
CTCGCTCTCGCGCGG  
>locus1171  
GATGTGTTAGATGTCGATGACAAAGTGGCTTTGGAGAAACGCGTCGTCACAGCGCATCTCGGCTTCTGTTGCCACA  
AAGTACGTCCTGACCGCCCTGCTGCCCGCTCAGGTTTCTCTCAGGCTCGTTTCGCGCTCCACGTCATCGGCAGAGA  
AGTTATAACAAGAAACGGAA  
>locus1172  
CGCACACACACACACACATACACAGCGGAGAGACACAGAGAGAGAGGGTTTCGTCGATGGCAATCAATG  
CCGTTGAATTAACGCTGGCTGGCGTTTACGGGAAAGTAAAGTTAAAAGAGGAAATGAGCGCCAACTAGCGGGCG

```
GCTATGGGGTAGTAGAC
>locus1173
CGGGCAGGCACCTCCGACTCCGTGAGATCGATGAGGGAGCTTCTCCTCGGTGAGGTTCTCCGAGGACCTTCTCCTCGTC
CTCGCCCTCATCCTTGAAGACCTTGACCTCGTCTCGCTCGCGAGGTTCTCGCCGCCCGCGTGTCTGCTGACGTGCGGCA
TCGTGCTGCTCCTCCTC
>locus1174
TCGGTGGAAAGACGGGGTGAAGGGGGGGGGGGAGCGAGCGGGATAGCCGATAGCTAGCACTCGTCTTTAGTCAAA
CCTCCGCCCCCTTTCAATCGAGACTTCACACGCTGCAGCGTGGAAATCATGATTGGAACGGCCGCTGTCTGAAGCAAGG
GCTGCTCTGCTCGGGGG
>locus1175
CAGCAGCGACTTTGAAAACAAGCGAGAGGGAGAGAAATCGTCGTTCTTCCCGGGAAAAGAAAGAGGGGCGTG
TCAGCTGGTGGAAATTTCTGATATATGCTAATTCGCAGTTCTGTTCCACTCCTTAACTTCCCGCCCGCTCCTCCCA
CTCTGTATACTCGGGCC
>locus1176
TTCGCGATCCAGAGCTCGCTCGCTCGGCCTCGGCCATTACTCAAGCATTTACTCGTTAAACGCAATCATACGTCAAAA
GGCCTTTCAATTTGAAGCGCATTGTGAAACCCCGCGATATTAATGCGCGCGCTGTATCTGCGAGCAGCCCTTCAGA
GAGGGAGTGCCCTCTCC
>locus1177
CTCTCGGCGGTTGCGCCCGCGGTTACATCCCTTATAGCATCAGCTTTACGTTTACGAGCAGCAGCGCTGACGTTTACG
AGCCACCGGCTGACGTACGAGCCACTTGTGCTGCTTGTGCTTGTGCTTTTATTGCTCGCGCTCAGCTCTCTCCAC
TCGCTCTTTTACCGGC
>locus1178
GGTGGAAATATCCCACTCTTCTCTTTCTTGGTTCGGGGCAGCAGCAGCAGCGGCGGAGTGACTCGCGACATTAGTCCACT
GACACCATTTGACACTTTTATTAATGACGGCTCGGAAACTCCCCCTACGCGCGGATTCGCTCTGCTCGTGGATTTCG
TACTCTCGCGCCGAGCC
>locus1179
CAACACAGCGGATCGCGTGTGTACAAAAGGGCGCAGCGCGGATCGCGGAGCGATTTGTCGCGCTGTTAATTA
GTGAAAACAGGATGAATTCGAGCGATCGTATATTACCGCTCTCTCTCTCTCTGCGCGCGCGCGCTGCCCC
TAATGGATGGGATTACA
>locus1180
CAGTCCCAATCTGTCAAGCGCCTCCCACTGGCCGCGAGCAGCAAGAGCTGCGGCTCGCGTCTGTTGTTATGTAATA
TATGGAAAAGGTTGTTGATTTCATGATGAGCCGAGCATGAATCTCTCTCGCTGTCTGTCGCGCGCCGTTGAAGCTG
ATGCATTGCAATCGGCC
>locus1181
CGTGTATCGCCCGCTAGAGAGAGAGAGAGAGAGAGACTCCATGAAAAGCGGGGAGCGCGGATACCCATTAATCCTA
AATCTGTCGCCATAAGTCTTCGTTACAATAAATATCCTACCAGCTCGTCTGGCTATACCTCTCTCTCTCTCGCTCCTCACT
GCGCTGGGGGGCTTTGG
>locus1182
GCAGTAGCAGCGAGACAAGGAGCTGGCAGCGCGCAGGTAAGGCGCGCAGCAGCAGGAGCCCTGCTGATTGCGCGCA
TGATGCTCTATGACACATCGAGGCAATCCCGTGGCTA
>locus1183
GAACGTAACCTGATACATTTTGCAGAAATATATGTATTGTTATTGTTAATTGAATACTCGCACTTTTTCTTTGTCGT
TCCCTCCACGTATCACAACAATAATCTAGGATTTTAA
>locus1184
TTATGTCGCTCTCGCTCGCGTGGGAGTGTCCATCCCGCGCGGAGGTTAGTAGTCGCGCCGCTTTACGAGCAAC
CTGTGGTAACGAGAGCGATAGATAATAACCGTTGCTCCCT
>locus1185
TCGGTGGATGCCCATCCCGCTCCATGCTCCACTGGGTGCCCCAAAACCAACCAAGCCATTAAGGGGGCGCTCTCGCA
CTAGTCTCCATCTGTTACTTTCTTGGCTTCTTTTCTTT
>locus1186
AGAGAGAGAGCACTCGATCGCAGGACTCCATTGCGGTTAGCATAATGTTAAACCGAGGAAAGCGAGCTGGGGACA
CGCTGTGACAGCCCGGCGCACGCTTTGCTCTTTTCTATTT
>locus1187
GGAGCGATTCTTCCCAGCACAATTTACAGTTTCACATTTTATTTCCATCGCAGCTTACCACCGCACCCTACGAGGGGG
CTGTTTTGTAGCTTCTTCTCTCTTCTTCTTCTCCGTCCTGCGG
>locus1188
CGGTGAGGTAATCGTTGTTATCTGGACAGTATAAACCCTGAAATGGAGTTCTCGCGCGCGGAGAGAAAAGCGAGAG
AATGCAAGAGGGAGAAAAGACCGCCATTCCCGCGAG
>locus1189
CGGGCACCGCTGGGGCAACAGCAGCCCAAGCGCGCTGCTCGCGCTCGACCAGAAATTTATGACTTATCAAGCCA
TCTAATAGTCTCATCAGGATGCAAGCCTGCAGATCTCAT
>locus1190
GGCTCGGCATCTCTCCGTCTATTTTGTCTCGAAGCAACACTTCCCGCTGCCCGCGCAGCACCCCGGGTAAGCAAAGC
AAACGACTTCCGTGGAATCTGGACAACCTGTGCAACC
>locus1191
CCTCTCTGTGTGCGTGGGTGATCGGTATCTGGTTCGCGGTTTTGGCAGTAGACTCGCCCGCTGTACTGCTCCCG
TGCCAGAGCAGCTATATAATCCCGAGCGCAGCCGAGCTC
>locus1192
ACACTTTGAGAAAGAACTGAACAATGGTCAACCTGACGATGTGACATTTTCGGGACCTACAGAGACCTCAGACTGTAC
AGTATTAATCAACAATTTATGTTTACTAAGATTAAATA
>locus1193
AGTACCAATGGAGTGTATAACAATTAAGCGACTAGCAGCAGGTAATAATATTGTTGATTTTTATTATTTGTTGTTGT
GCATGAGACTAGCGTAATAGACTGAGCCATACACATGGTT
>locus1194
CCCCGAGACACTTGATTTATATAATTTATCGGCATTTAATAAATAATCATTTTGGGACCCTGTGCTGCGGTTACCCG
TCCGAGATGCGATACGAGCGCTACCCTATGCAAGAGAG
>locus1195
GGCCACGGTGTGCTATGTTGATGTGTGCTGCTTATTTTCAACCCGCTGCTCCTGATACCTGCAGTTAGATCCGA
GAGAGGATCTCTCTCCTCCCGCTCTCTCGCACTTTCAT
>locus1196
GCGCGCAGCGCGCAGAAAGAGAGCAGCAGGAAAGTAAGGACTCGCGCGCTGGAGCAAGCTGGGTACCAGTTA
AAATCTCATTGCGGCTCGGCCATTCTTCCGCGCGGTTT
>locus1197
AAAGGGTCTGATATGCATATGAGTGAACGCAATGACAGCAGCTGTAAGATTCTTTTCTCATTATTTAAAAAATCGA
TGTCTGAGAAATGGTGTTCACAAATAATGTTTACCAACGAC
>locus1198
AGCGAAACCCAATCACTCCGCGTCTGCGCCATTAAGGCGCCGCGACGCTGACGCTCGCTGACGTGACAGGAGCTT
CTCCGCCACCCCGCATATAGCTACCAGCTCGATCTCCT
>locus1199
CGCGCATGTATGATGACTGCTGCTGGCAGCCAACAGCAGACGTTACCAGCCCGCCGCGCCACCTCGTCTGCTGG
CTGCTCCTCCACTTCGCGTGAATGCGCGGAGAGAAAC
>locus1200
GCGGGCCACGTTTTCCCTTATTTATCGTTTCCCGATGCTTATGTTTTACTAGGCCAGGCTCCCGCCGCGGCTGCACGCC
CGTACACGATAAGGCTGCCAAGGGTGAATCACTGAAGGA
>locus1201
GTGGTCCAATGATTTAATGAACAAGTGTTTTCTCATATATATAAAGTGTCTCGTGATGTGTATAAGCCCGG
TAACGCTGGTATCACAGAAATGATGATGTTTATACT
>locus1202
GAGCGCGAGAGATGTCGTACAGATGTCATTACAGATTTCAGGGCTCTCGTGAACCGGCTCCTGGCACGGC
CCCCAGCCGCTCTATATAGTCTTTTTTACATCTATAT
>locus1203
CCAACCCGAGGGGTACGAGTGTATACAAAGGCTCCGCGAAGAACAGATGCCTTATAATATGATTTTTTTATTAAAC
ATCAAAAGTAATGACACTTGGGTTGGCAATGTCCTCTGT
```

>locus1204  
GTGTGCGGCCCTGACACACATTGACTCGTTAAAAATAACGACATAATGGCTAATTTAGCGATAATGAGCGGAAACCGTA  
TCGTTCAAATTAGCGTCGAAGGTGAGACGTAAGCTGTCTGC  
>locus1205  
AGAGAATTGCGAACAGAACGAGAAATGTGAACAATTTTCGAATAAAGCTATGAGTATGATGAGTGGACAACGCAAGGAGTT  
GCTTGGGTTACTGTGGTCACCAAGCTCCGATTAGTTCGCC  
>locus1206  
CGAAGTTTCAACTCCAATTGGCCATTTCGTGACTCGAGCGAATCTTGCATTTTTCTTTCCCAACAAACGCTCTATCATT  
TATCACGAATCGCGGAACTTTTACGGCTCGACCTACCTG  
>locus1207  
TCGGCGAGCCGAGCGAGGGCGCTCGAGTACTGACTAGCCTCCATCGATTTACCATGCGACGCCACTCTTGCCACCCTACACTG  
CTGCCCTCGCTTGGGTTGATCACCCCTCCACCCCTCGC  
>locus1208  
TTGCCAGCCCGGAGTGGGGAGGAAAAAACAATGGCGATCGGAGGAAAGAACGCAACGCAAGTCAATCGTGC  
GTCTCTTAATAGAAAAGTGGGGTCGATTTATGGGTTATAG  
>locus1209  
ACCTGAAGCTTGGCCGTGTACCTGACCTCGGCGGGGGTTTCGCGGCGACGCAAGGTGTAGTTCGCCGAGTCTCGGCGGC  
TAGATTGGATATGCTAAGGAGCTCGAGTAGGGATCAAGC  
>locus1210  
CAACGACTCTGCCACCTTATTGGATATGTGAGCAATTTATTTTTTTTCCCACTACCACGCGCAGAGACTACTCTA  
CTACTCCGGCGAGTCAAGCGCCCGGAGCGCACCTCT  
>locus1211  
AGGAACAAGCCAAAAGAGGGTTAAGTACAATTTCTGGTGGCGGACACAAGTCAAGAAATCGTAACGCTTTTATTAGT  
CACTTAATGCACAATGCAAAAAGACCATGACTATTTTC  
>locus1212  
GCCGCGAAAAGTTTGCCTAACGGTAAAGCGATGAGTTAACTAATATATTCCTGCTCAAAGTTTTTATAATATTTCTGC  
AGGCATTGTCTGGCGGAGCGGAGCGCCGAACAATAAAA  
>locus1213  
GCAGAGCTATCATATAGAGAAGGAATCATTTGGATGATCTTAATCATGCGAACCTCTCTCCGTGCTGCGAGTCCGCCA  
ATCGCCGAGGCGGATTTCAATAATGGTTTCCATCCAGCCC  
>locus1214  
CGGCTCTATATACGTGAGTGCACGGAGGAGATGCTCTCTGTACGCCACAGTTCGAGCGTACGCGCGTAAATGACATGG  
TCTAGAGATGCCAGTCAAGTTTGTAAATAACCCCGGTAA  
>locus1215  
CTCGGCTCACACGAAATCAAGAGTAATGCCAACACGAACTGCACACCCCGCGCTGCTGCCGCCCTATACGCC  
AACCTGTAGAGAGACTGTATGAGAGCGAGAGAGAGA  
>locus1216  
TGTTAAGCTGGACAGCTTAGCCCGCTATTACGAGCAATCACACTTGATTATTTTTGTCTACAGAGTAGTCTATACACC  
GCGCCGAGTTATCCTTCTCTCTTTTCGCTCCGACTCT  
>locus1217  
GCGAGAGCTGAACCGAATAGCTATAAGGGATCCACCGTTGAGCGTTCGCTTTGGCCACACACTCTCTCGGTGGCTCC  
AATTAAGCGGGCAACATTAATTTCAACCACCCGGCGTTA  
>locus1218  
CATAACATCCGTGATATTTTGTGACATGAAATGTCATGAAATAAATGGTAATTTTTGAAACTCATCCGCATAAGACT  
CAAATTTATTTAAATCTCTCTAAAGGTACACCGCAT  
>locus1219  
ACTCAAGCTCAAGCTCAAGCTCGCGAGTACAAGTTGGCCCTCTCTCTCTGAAATGCGGGCGCTTTGGTGTATGACG  
ACAGCGTAGCTGTTCGTACGAGTTCGCTCGGACTCAA  
>locus1220  
GAGTACACTCGGTTAAGTGACGATTTACCTTGGGCCAGGCCACCCTTGCTTACGGACAGACTGAGAGGAGACAGA  
GGCCACAGACTACACTTACTGACCGGATGAATGACTCG  
>locus1221  
GGGCGAGTTGGGGTTGGTTGGTTGGCTGGCTGCTACGTCGCGGATTCGCGATGCCGGGACGTCGCGCTCAGAC  
GAGGCTACGTGCGACAGACTACGCTTTTACGCTGCTACT  
>locus1222  
TAAGTCATTTCTGCGATTAATTTTCTTCCAATTTGCACGCGGCAAGTAAATTAAGGGACCGGAGAGCGAGTACATCATT  
CGGGCAGAGGGTGGGAGAGTCTTGGTTCTCTCTCGGAGC  
>locus1223  
AGGATAATTTTTGGTGGAAACGCAACAATTTTATCGGCCGTTGTTATGTGAGATCAGTTGGAGCCTACTGCCGCTCGCG  
TTACACCTGCTCTGCCGGCTGTGCGCTTTGCTCGTCT  
>locus1224  
CAGTACATTAAGACACCCCATACCTACAGATGTTTAAAGAGTAAGCAACTACTCAAAGCGAGTGGATTGATGCGAGCC  
CGGTATCAGGAGAAGGAAATTAATTAACCAATAAAAAG  
>locus1225  
GCGATAATACCAATCATTATCATCGCTTAATAACAGGCATTAAGTCCAAATTAATGTGTACCCCGAACGACGGA  
GGAAGAAAAGGGGTGTGTGTGTGTGTATGTGTGT  
>locus1226  
GTGCTCAGGAGGAGGGTTCGCGCCCGCAATGGGCTCCCGAGTCCGTGAAATGAGCGTCTGCTGGCGCCCGGAG  
CTCCACCTTAGACGCGACGAGTACGAGCCCGCAACTC  
>locus1227  
TTGCTCGCTCAGTTGTTAACTACTGCTGCAGCGGCCACACACACAGTGACACCGCGCGCTGGACCGGTATA  
ATGATACATAATGAAGCCCGAGCTCTCCCTGAGCCCGC  
>locus1228  
TTGACTGTGTAGGGATCTGACGAGCGAGGGGCACTCGGAGAGAACATGGACAATGTGAATGTGCAAAATGATCGGCAC  
TAAATCACAGCGATCAAGGAATACTTATATGTAAGACCA  
>locus1229  
TGCGAGAAAAAAGAGAAATAAACGAGCGCAAGAGAGAGAGGCAATGTACACCACAATATATTACATCTTACAAC  
CGGGCATGCCCTGAGAGTACGAGAGTAGAGCGCTTGTATCG  
>locus1230  
TGTGTAATGTTTCGCTAGGAATCCCTCGGATTTCTTTCCGCGGAGCGCGCGCGCAACCGCGCCCTGTTTGCCTACT  
CACTACCCCTGATTTAGCTGGACTTCTGTCGCGGCGAGTC  
>locus1231  
GCTAARAGGTGGGAGGAAAACGAGCGGGAGAGAGAGAGAGAGCGGGGCACTAATACATAAAGTAGCTTAAAGTAGAA  
AATTTGGAAAGCTGCTGATGCTGGTATTGCGTTACCT  
>locus1232  
TATATTTGCGTCTGCTCGCTGTTATCGTAGCTGAAAATCGTCACTAAATATTAAGGTACGACTATTGCCTACTCAATGT  
ACAATATGTAGTATTACCTGTTGTTACCACCGAACCGTC  
>locus1233  
GAAGCGTGGCGCCTTTCCCTGGCTGCAAGAAAAGAGAGCGAGGGAGACAGACAGTCCCGCGCGGCTTCCGCTTCCCTTA  
TGCTCCGCGCGGACTGCATCAACCAGTCCGCGGTTCCG  
>locus1234  
GAAAGCAGGCCGGGTGTAGTAGGACGCGCGGCGCGGAGTGAATCCGCATCGGAGCGGCTTCTCCATCTTGCAGT  
ATTATTGACGTTTTTTGCCACCCCTATTTTTCCCGCGCTC  
>locus1235  
AAGAAAGTTCATTTGTTTTTCGATCGGGTTTTAATTTTTTAAATGAAATAATCTTGCAGTAAAACGAATACCGGAGCAGCGC  
GCACCGTTCCCCAGTTTTCTCAGCGGTCTCTGAGAGA  
>locus1236  
CTGARGGGGGCGGTGAAATATAAGCTAGATCTACGGGAAAGATAAATGAATCCGCCCCACTCCAGCTTCCGCGCTCG  
CTATATACCGGAGCCTTCTGCTTTCTTCTCGGACAGAG  
>locus1237  
TCTCGGCTGCACAGAGAAAAGCGGGGAGCGGAGCCAGCGCGGAGGAATAATCCATTTTCTGCGGAGTACAATTTTG  
CTTTCAATTTATTTCCCCCTTTTTCTTCTCTCAAGC  
>locus1238

CTCTCGCTCTCCCGCTCGCGCTCATACAGACTAGCTCGCGCGCCCGCCTAATCTCGTTCTAAAACTAATTCCGCCA  
ACAATTTCTAAGCCGGTCCATTAATAATTTCTAAGCACAGAG  
>locus1239  
CGGGGGCTACTGTAGTTTCGGAACACAGCCATGGTCTCCCTACCTCCCAGGTACATACCGACATCATCGTGCTTTATA  
TTTTCTTATTGCCCTTCGTTCTGACGTCTCGTTCTTTCT  
>locus1240  
ACGCTGCGAGAGAGAGAGGGGGTGGGGATACAGAGGAGAAGCGGGGACGAGAAATATATGTGTTCGATCGGCCGG  
TTTTGAATTTATTTGAAAAGAGACAGACCCCTCGCTCGCTC  
>locus1241  
CCCTCGGGGTCACGGGGTGAATACCGTTTACCAGACTTAACCTCACTTTTACCCTCTATTTCCCGCTCACGCTCCCTCG  
TCGGCGCGGAGAAAAAAGAATTTGGCGGTGTTTTTCA  
>locus1242  
ATCAATATATACGTGGCAATAGAACAGATTTGTACTTGCATTGAAATGTTTAACTCACTCAATCACTTCGCACAG  
CCAGTGTAGCGTGTATGTTATCAATATTTTTGTTTTCA  
>locus1243  
CTCTCTCTCTCTGCTCTTTCTCCGCGTCCCGGTGTCAATTAACCGCTCCGGGGCTGGAAAAATCGCGACCCCT  
GTTTCAATAAGGTGGCTTTACCTCATTTGGGGGAGAGA  
>locus1244  
CCCATCGCTCGAAAATCACCCCGTAATCGACGGACAAAAGTAATTTCCATCGAGAGCGGGAAGAGGTGATTTGC  
ATGGGTTCGCGCGGAGCGGTGTGCGCGGACTCGATAGC  
>locus1245  
CTCGTGGCGGGCGCGAGACCTAGAGAGGAGAGAGATGATGCGACAAAAATCAGATGCACGGCCATTGGC  
TGTTCTCAATTCGAATTTATGGCTTCCCGGTCCCGCTC  
>locus1246  
GATTGGGCTGCTTCGCAGAGATTTCACTGAATTAACAAAAGAGATCAGTACGTGTAATGTTTGAACAAATAT  
GAAACATTTATTTGTTTCAGTGCCTACATATTACACAGTAA  
>locus1247  
AATGTTTTATTCTTAAATTTATGCACAAATGCAATCAATACAAATGATCTGAAACAAGCAAGTTGGGGGATCTCAGT  
TTTTTTGCGCCTTACAATAATATAGCATATATGCTCA  
>locus1248  
GTGTATGTGGAAGGATACAGAAATAGAGCGCACCGGTTAGGTAGAGAGGCTGCTCACCTGGGGTAGAATCATGACGTG  
GGCAGCTGGCGCGCTCGCCGCGCACTGACTCGCTCCG  
>locus1249  
CTGCCGAGCTTCGGCTGTTTTATGGCGCTCATTTAGTAGGTTGTTTCCCGCTCGAGGTGCTCGCCGGGTGTGCGC  
TGGTGGGAGGCTTCGGAGCATGGCGCGGGGCAACG  
>locus1250  
AAAGGACGCTTACCAGTACTACCTATTGATCGCAATCTTTTTCTCTTGTGCATATTAGCGAGAGCGCGCTGCG  
CTGTGTCTACTCTCTCTCTCTCGATTTTTCCGCGC  
>locus1251  
CACCGAGCTAGTGTAGGAATGTGGTACCCTGCTTTCACAGTACAAGCGCGGTATACGCTCGCTATACACACACA  
GCCACGCGAGACTCAGGCTACCTTACCTTCGACTCGC  
>locus1252  
TCTCTCTCTCCGACTCCTATGCGCTGCGGGTAGGTTATCGTTTGGCGACCTCGGGAACGTAGCAATATCAGCCATTC  
CTCGCAATAGCTGATGTTAGTGATAATTTCTGCGCC  
>locus1253  
GGGAGGTTGAGCTCTCGACTATACCGCGGGTGGCTCTACGTACAGCGCCCCCTCGGGACGAGGCGCTCTTTA  
TGCTCGATATAATACCGCTCATAAATACACACTTCAC  
>locus1254  
GAGAGAGAGAGAGAGAGAGAGGAGCATAGAGTCGTTTCGGAGGATGTTGCGAGAGAGCGAGCTGGAAGTTCCCGCG  
GGCTGTGTTATCGCCTCGCAGGATGACACCGCGCGC  
>locus1255  
AGGCCGTAACAATCCGTTTCCGATACCTTTGTAATTTGAGATGATCGGCTAGAAGCTTCTCTCTCTCTCTCTCTA  
TACGGAAGCACATGTCGAGCGACTCGTAGTCGGAGGAAA  
>locus1256  
CAATAAAGATCTTCGACAGTGGATGTGACAAAAATGAATGTTATTTGTCTCAACAAATGAAGCGGCTCCCTTTTT  
CCGTGCTGCTCGCTCGGAGCGCGCGCTCGTATATCG  
>locus1257  
TGTAATAAATCCAAAGGCTTATAAAGCTTTATTTTACCGGTAACGTAATGGCAGGACGCGCAAGCAAGCTCCCG  
TTCTCTCTCTCGTATACATTTGCTCTCGCTCGCTCGCT  
>locus1258  
CAATCTGAGTCAATGTTTCCAGTAACTGTTTGCCTTTCAGTCCGACCCCTTTTCCGCTCGCGCGAGCGGGAGC  
ACTATTTGCTCCGTTAAACGCGCTTGAATAAGATCGAGT  
>locus1259  
TCATGAATCTCTCTGATCTTTTTTCATCTCTAGTACTCCAAAAGCTGCGATTGTTCAACAGAGCGCACTATAA  
TACAAAGCAAGGCACTTGATAAATAACTTAGTCTTCTA  
>locus1260  
TCGTGGCAGTATCAACAATGATAGTTATACAGTACGTTATAATCGTAATAGTCGCGCAACATAATATATTCG  
GGCGGGCTGCTCGCTCGCTCGCTCGCTCGCGCT  
>locus1261  
AGCAGGATATGCGGTGGGGGATTTGCCCAACATTTTACGTTAACGTATAAATCTCGAGCTCAAGGGGAATTGGCAT  
GCATGAGAATACCTGGCATTTCGATTAATACGGGTA  
>locus1262  
AAAGAAAGAGGATATTTCTCATGAATTTCAAACGAAATGCGGATCTAATCCCTGGCGGGAGTAAATCATTCAGC  
TCTCTGGAATCCATCCCTTACCTAACTCCCGCTATT  
>locus1263  
GCAGAGGTACGCCACCTTAAATGCCTCATTTGAACCTCATTAATGCTTTTTTATCTGTACATTTACAATTTGTGTACCA  
ATGAGGAACGTTGTTAATCATGTTGTTGATTTATTGTT  
>locus1264  
GAGAGACGACCGGGCTGCCCGGAGCTGCCACAAAGGGGATGAGAATTTCCCGCGGGGAAACTATTGTCCG  
TCGTCCGCTTTTAAATCTCCGTAATTCAGCGCTGA  
>locus1265  
AAAAAATGACATACCTGACAAATTAACAACATCTTCTAAATCATGAATAACGCTCTGCAGTAGTTTGTATCCACTAT  
TAACCTCACGTTCAAAAATAACGATATAACGGATCCTTGAT  
>locus1266  
CAAAGAGGAAGTGGCAAAGTTATTAGAATGGTCCGAAAAGATGGCGTGGAGCGCTCCGATTTTTTCTACTGTATGGC  
GCTGCTTTGCATAATCCCGCACTTAGCTCGCGCTCGCGA  
>locus1267  
GCACAATCAGAGCATACTTAGTTGTCGCTCGTAAAGCAACCCGATGTCGCGAATACCGGGAGAGCGTACCAGGCTG  
CTGCTATTTCTGCCAGCTCAAGCAGTCCGAGTCCG  
>locus1268  
TATTATTACTCAAACTCGTACAAACGCTCGTATCACGATCATTCGGATAGTTTTTTTATATTTTGTAACTGAGCA  
TGCTAAGTCCCAAGCTCCGTCACCGGAGTTCTATATAAT  
>locus1269  
GGAAGAAAATGAAATAATCGACTCGTAAATCGTTTCAAGGAGGGGATGACGGCGCAACTCATGCACTGGCGAAAA  
ACGTGCGCATCAAGTACGGTGGTGCAGTCTGCTCGGTC  
>locus1270  
ACCAAAAATAAACAGCTGGAATATAAACACTACGCTATTAACGTCACCATTCGATGACATATCCATCCACCAA  
ATCTTTTTAAATCTTCAATGTCATTTTTTATTGGATC  
>locus1271  
CGGAGGCGCGCGCCAAAAATCAGATCGAGTGAATAAATCGCATAACTCGTCTGGCAGACTCTCGCGCGGAGCTA  
TGCTCTTTTGTGTCAGCGCTCGCAGCAGCTCCAC  
>locus1272  
CCCATCTTTGAATCTAACACAAGGATGAAAATCAACATCATCAATAATCTTGAGTTAACGAAAGATAGCGTTAGATCT

GGCATACCACTTAGTTTGATACAGCAATCAATCTATAAAG  
>locus1273  
ATGCTTATTTTTATGGAATTTGTGCTGAAGGAACCTTAGAAGTTAATAGCTGGTAGTGGGAATGGACTCCAGAATC  
CCTATAAGAAATATACTCATCAACTTTTAGTAGCAGTT  
>locus1274  
TACAAATAGTGACGAATTCAGTTTACTACTTTATCTTTTTTGGTGACGATTCAGAGCAAAACGCAATTCGCGCTCT  
ACCAAATCGCTGACAGCAGACAGAGCGCGCTCTTCACACA  
>locus1275  
CAGCCGGGATGGCATGCACAGCCATTTACTTCAATATGTCATTAAGCTTAATGGCTCCCGCCCGCACCGGCCCTAAC  
ACGGCTGTAGGCTATAGCCACTCTTCGCAGTGGCGCAGTT  
>locus1276  
GAAGTGTGCTGTCGAGATGGCGGATCCAAGCCGCGAGGAGACAGGAGGACTGCTGGCGAGGAGGCGCTCCGCGCT  
GGCGGCAGGCTCTCAAGCTCGGTAATTAATTAACCAAC  
>locus1277  
TTTTATACCTCAATATACTTTATACAAAAGGCTACTTTATAATCTAACATTAAGACATACCATAGCATGTGCGCCCTCCA  
CCGTATCGTAAGACGATAGTGGGATGCACGCATGTTTTG  
>locus1278  
ACATTATTATACCTTTGTTTTTTTTATCATTATCTGTAGAATATCACTTGAATGGTTGTGATTGTTGAACCTAATGGAG  
CGGATGTATAGCGAAGTACCAGAATTAGTTGATGTTGG  
>locus1279  
TGCTGCTGTCGCTCAAGTAGGAGAAGCTCGCGCAACGCATAAGAGGGAGGAACAGACGGAAATAGCCAAGTGTCTATTG  
AACCGATTGAGCAAAATCACTTGAAGCTGGTCTCTC  
>locus1280  
GGCTCACACAAAGCCCTTCGGCAAATTCATAACCGAACTTGTCGTTTTGCGGAGATTATTTCAATATATTCGACTCA  
AGCTGGCAAAATCTGTTTGGGAGCTGGTGTATGCGTGAATG  
>locus1281  
CTCTGGCACGGGCACAGCGCGGCCCGGTCCGCTCTACTGCCAGGCAAAGTGAGAAACCAGGTTCTGACGGGTAACATA  
TCCACAATACTCTCTCTCTCTCTACTATCGTTAAAT  
>locus1282  
GAATAATGTAATAATTTGTATGTTTTATGAACAAAAAATAATATTTGATGAACAACGTCATCTTTGTTAGCGGCA  
CTGCTGCAGCCTCCACTTCTTGTGTCATTTCTACGCTCCT  
>locus1283  
AATCATGCAAGCCCTTTCTCCCTCCCTCCCTCCACCCGAGGAGAGCTGCGGGCCCTATATTGCAATATTTGTACT  
TTTTCCATGTTGAACCTCGATATACAATAAATATATAATA  
>locus1284  
CGCAACATAGTTAATTTAGATTTGATTCGCGTGAGAAGCAGGAATGACGAAATATCCTGAGTGTGACTTACGCCCGCG  
CGCGCGCGCGACTTCTCGCGACTCAGCCCGAGAAAA  
>locus1285  
TGGAGGTGAACAACCGAGTACATAACTACTGTGAAGTATGTCGACTACTGTTTAAAGCTAAAAACAAGACTAAGT  
GTTCATTTGTGATTTTTGATTTTATTAGAAATATTTCTAAGT  
>locus1286  
GTAGCGAGTGGTGTGTGTGGACAGTGGCGGTGGGACTGAGTGGTGGTGGTGGGACTACGGGGGCGAAAGCACTGCT  
GTCCCGGACGAATAGAAAATCCGTAAGCTTCTGCTGGCT  
>locus1287  
CTACACAGCTGAGGAGGAAAGAGAGGAGGAGGAGGAGGAGGAGAGTACAGTAACCGGGATCAATACTCC  
CGGCTTTGCGATCATTCATCTTGGCAGCCCTCGGCTC  
>locus1288  
TCTTGTTCGATGATCGCCGACTCTCGATTGAACTGGGTAACACGTAAGCTTTGGGAGGATTTCCCTCAGACTGCTCA  
CCGCAACTATAACTCGAATAACCACTGCTTACCTGGT  
>locus1289  
GGGGGCGCTTTGCGAGTGCCGCTGTAGCGCATCGCACTATGACTAATTTAGAACACGAGAATAAGAGGCACCTTGC  
CTCGATCTCTTCTTTTCACATCTTTCATCTTTTCGCGCG  
>locus1290  
TTTTGCAAAATATTTACACAGATAAATACTATACATACGTGACTCGAGTGCCTTGCAAAATGGGTCCAAATGGTCGATT  
GGGCACTGATTTCACTGTTTCATAGGCTTAAAGCGTTTTTA  
>locus1291  
GAAGGGTTAGCTTCTAATTTGTTTTGTTAAATGACGCGGAGTAAGAATCCTCCCACGGAAGGACTGTTGAGCCCCGT  
AGCTCCCTCTCCCGTTTTTCTCATCTCGTCCGCTCTT  
>locus1292  
CGCAAAAGAGAGGAGGTAAGGAGACGAGCCGGTGGTGGGGGTTGGTGGTAGCGCGCTATATATTTAGAGT  
CCCTAAGTCTAAGAGCCTTAATCTCGGATAAGTTATGG  
>locus1293  
TACTGATCGGATCGCCATTAAACAAGGTTGATGACCCCATATGGACAACATGGGGCTTTTTATGCGGTGTTAGTAG  
TCTGAAACTGTTAGAGATTACAGAGACGAGAGGACAGTG  
>locus1294  
CCTATACTATAGAGTGAAGAGAGAGAGCGAAAGCCGGTGGCGCGAGCGAATGTTGTCAGGCAATTTTCTTGGCCA  
GTGCTCTGAATGCCGAGATTTCCATCTAGCCCGGGCT  
>locus1295  
TGGCTCAATCGCTGTATTCAATTTGTAACATAACAGGCTAAATGTATTACACAGCGGAGCGGGGCGATAGGCGGAGC  
CACCGAGCTCTCTCTCTCTCTCTCTCTCGCTCGACG  
>locus1296  
GGTGTGTGTTGTCGACTCTTATCGCGCCCCGGTGGTGGTCTTATGCATCTTTCATGAGGTGCGATCCAAGGGGT  
CCATTCGCGCTCGCGCAGCGCATGTGTATGTGTATAC  
>locus1297  
TTAGTAAACCGGTCAATATAGGCGCTCCGCTGCGCTGCTGTGCGCAAGTGAACATACATCTTCTTTTCTCT  
TCTCCATCTCTTTCTTCGCTCCTAGGTATGTTG  
>locus1298  
TGTCAAGTGTCTATCAGCCGATGTATATGTTGTATATAAGGGAGCTGGCGGAGCGCGCGCACGCTGCACCTGC  
CGCGAGAGTCCGCTCGTAAATGGAGCGGGCCGACAGGTAG  
>locus1299  
CAGTCCGCTCCAGTGTGCTGCTGCTGCTGCTGCTGCTGCTGCTGCTGCTGCTGCTGCTGCTGCTGCTGCTGCTGCT  
TTCGCGCTGCTGCTGCTGCTGCTGCTGCTGCTGCTGCTGCTGCTGCTGCTGCTGCTGCTGCTGCTGCTGCTGCTGCT  
>locus1300  
ATTTGAAAAAAAATCAGTAAAGCAATAACCTAGTTACAGTATAGTAAAAACGAGCCTTTCTCTTTTGGGCTAATTC  
TTTTGTTTTTTGTTTTGTGGTTCTTTGTTCGTTGCTGTTTTGCTGCGGTAATC  
>locus1301  
GACGGCGCGCTTTAGTATGGTGGCAACCGGCGAGCGCGATGGCCCTCGGATTCGCGTAAAGCAGAAATCAAT  
TTTTCCAGCTCAGTCAAACGAGATCGGGAACAACCGTAG  
>locus1302  
GGGAGCGAGTTCATAATGCTGCTCACTAGCGGGGGATGAACTATTAGCTGGGTGGCGGAAGTGTATACCGGCT  
TATGCGCGGTGAGTGTATATAGTATACCTGTATAC  
>locus1303  
TTTTGGCGGACAACCAGCTGATTAACACGGATCATCTCCGCAAGTCTCAGCCAGCCCTACCCCTGATGAGAGGAGC  
ACATGTCCATTGCTGCGCTGAAATGACAGGTGAGTACT  
>locus1304  
ATCCAAGTGGCACATCGATCCGCTTAATGAGTGAAGAAATAAGACAGCCCGCTCTCGCGGCCAGCCCTACCCCCGG  
CGCACACCACCACCCCTCGAGCCGAGATTTCTGTAG  
>locus1305  
CTCTCTCTCTCTCTCTCTCTGAGCGCGGTGCTCGATCGATAGCACCCAGCGGAAAATTCGAAAGTAAAGTGA  
TTAACAGCGAGGAGGTAAAGCAAGAAAGGGGTGAGTT  
>locus1306  
GTGGATCGGGCCAGGCTTAAAGCGCTCGGCGCGAGCCTGCAGCCCGCGAGAGTCAGCCACTCACGGCGCGAGCG  
GACCGGAAATCGACGCTCACATATGAACTGGGAACGGAG



>locus1307  
AGCATTCACCGGACACGATTGCCGCGCAGTATTTGCAGATATAACGCAATAAACCTCGGGTGCAGGCTGAGGGAGAGGA  
GAAGCTCCGAACGCTGTGTGCTGCACATGCTCGTAATATTC  
>locus1308  
TCCGTGTCCTTTCCCGTGTGCCGCGGCGGGCTGCGGAAACTTTTTGTTATAGTCGCGCAAACCTTTTAATAATG  
CAACTCTTTATATTACGCGGCTTTTTAACAGCGCGCGC  
>locus1309  
TCTAGCGCGTGGTTCGCTGTGCAATTTCCGCGGCAGCTGATTTGGGGCAGCCTCCTCGGGAGCAAAAACTCCATCTA  
CAAAATGAACAGCCGTGACAAGAGCCATAATTTCTCGGAGC  
>locus1310  
TTTATCCTCGTAATCAAGGGACGTAATTTGCGTTTTATAATCCTTGGTCGCGGGTAAGAGGGTAAAATCTGAAAGCTTA  
GTGGAATATCCTTTGCTCGGCTGCGCAATCTTGTCTCTC  
>locus1311  
GAAATTCGCGTTCCTAATGAGCAATCCCCTCTGCTTATACTGGCGGCTCTCCGCTATATACCCTGCTTCTTAATTA  
ATGCAACTTTTATTATTGTTTCTTGAACAATTCACCCG  
>locus1312  
CGAATCAAGTGCCTCTTTCATCGTCGCGCGTCCGCTCCTCGGAAGAAGAACCCCGTGAAGTTGGAAGC  
AATCGAGAAGGTTAATCCCACTCGATTTGCGTTCCTCTGC  
>locus1313  
TACGCGTGTCCGCGCAGATTACAGACTCCTAATTAAGACGAGGGTGCAGAGGGGTTTCGGCCGAGAGTTTTGTTGGCT  
CTCGGGCTTCTCGAGCGCAATGTTTCGCAGATGGG  
>locus1314  
AATGCAGCATCAATATTTTCATGTATGCTAACACGCGCAGAATAAATGCTCGCGCGCTCGAGCGCGAGCTGAGAAGA  
CCCAAGATAATATCAGCTACTGCCGATTTCCGCGGTTTT  
>locus1315  
AGTGAACAAGCTCAATGTGTCAATCGATGTAATAAGTTTTCTCGTCTGTCTGTTATGCGCTACACAGACTATTACG  
ACCCTGCGACTATTACGACGATGTAATCTTTTTACCA  
>locus1316  
GTATAGAGAGTGCACGCGCGCAGGGGTGAGTGCAGCGCGCGGAGGACCTGGCAGGCGGCTCAGAGTCTTGTCTG  
AATATGTATAGTGTATCGATGCTCTCCAACGGACACT  
>locus1317  
ATTTTTGCACATACAAAATCATTATTCATATAAAAAGGACACTTTATACTAGAACGTAAGTCTTAATTTAGCCCTAAG  
TTCCGCGAGCCGGATAACCGAGTTGACCGGACTCGCTC  
>locus1318  
TGGATGTTTTATCTCGATGCAAAATTTGGTCAGACACATGGCTGCCAAGGGGATTTCCACTTACTTAACTGGTTTATG  
CAAAAATCTTTTGAATAATGAATATCTGTAATGGT  
>locus1319  
TAAGAACAAGGTGAGCTAGTGGAGTGCAGACTGTGTTAGAGGATACCATATTATGCCATGCCAGCTTTGTTAAAACGA  
TTATTATGTTTAAACAATCATATATAGACGAGTTAT  
>locus1320  
GAGAATACCTCGGTATGAAGCGCTATATAGAGAATACACACTTGACTACATTTGTAAGTCTTTTACGATTTTCCGGT  
TTCATAAGTTGTACTTTATGTAATTTGAAGAGAGAAAT  
>locus1321  
TAGAGAAAGATTAATACAGAAGCATGATAGTGAAGCGGGGAAATAAGCGTATTGGATGCGCAAGAGTTGTGTACAT  
TTAGTTAAGTTTTATATTTTCCACATTTTCAGTCTATGAT  
>locus1322  
GAAAGGAGAAAGTGAAGAGAGACGACGACGACGAGTCTTTTTCTGACGCTGGGTAGAATTAGTATATTTTATATG  
CACTGATTTGTTGATTATGACTATCGATAAATAAAAAAGA  
>locus1323  
TATACTATTTGTAATTTGTTTTATCTAATTTAGTTCCTTTGTAAGTCTTTGTAATATACATGCAATAGTCTATATTCG  
ATCGAGCGTTCTTGTATCAATGACCACAGCCTTCTTCAA  
>locus1324  
TTCGTAATTTACTGTACGAGACCATAGGTACATATATATATATATATATATAGCGATGGTACAACAAAGGCA  
AGTATGTACTGTACATAGCTGTCACTTACCTCTGCCCC  
>locus1325  
AATCGCGTAAAAATAACACAGGCATATACGATATGTAACCCCGGTAGTACCAAAATCCAACAGTAATTTTAGTCTGTG  
TGGTACAGATTCCTTATATTTCAATAAAAATCATTACTTGA  
>locus1326  
AGGTTTACTGTTACTCTGGTATTACTGTACTTGCATGCACAACCAACGTACTGCGCAGTCTACGGATCAACCAGATAC  
CCACTTTCGCCATCTGCGCTTGGATACCTTTGGCGACCAG  
>locus1327  
AACATGATATATTTACTAAGCACCTTAGGTACAATCTAGTTCACTTTTCAAGCCATGTGGATAAATTTGCTTCTCTCAGT  
GAACAATAATAAATACATATAGATATACGTACACACACG  
>locus1328  
GGCTCGTCTGCGGGGGCGGGCGCATGGCCCGCGCCGCGCAGCGCTCCTTCTCTCCTCACCTGTAAGCAA  
GTGTTGAAGAAATAGAGATTAGGCAATGTTAAAGAAATTTT  
>locus1329  
AGGAAGAGACGAGAGAGAAGCAGCAGCAGCAGCGCAGCGAAGGGGAGAGTTGACCTTCAACAGCGTCGGGAAAGTCAG  
CAGTCACTGACCGACAGACTAATTAATGCTCTATCCCC  
>locus1330  
GCAAAGCCTCGGGGTGGGCGCGCTGTTGCGGTATGTACTCTGCGCTCGGCCGCTACGGATAAAACAAAGGT  
TTACATCAGTGTGAGTGCACAAGTCCGATTTGCTCCGG  
>locus1331  
GAAGTTTCAAATGCGAGATTACAGTCCGAGTATCTTTGATCAGCAGTTATAATAGTAACTAACTATTTCTACATTTA  
TCTATAACCTATAAATCTGTAACAAGTGTATTGCGG  
>locus1332  
AAGCCCGCCCGTCAAGCTCTCCCTCTCGCGGATATGCACGTAATATATAGATGGGAGGAGCCGTATAAATAAAAC  
GCCATCTGAAATATGCATCCCTTAATAAAAAGCTCCAAT  
>locus1333  
CGTCGCGCGCGTTGACAAAACGGATTAGGGGCGAAGACGCCCGGAAATCTAAGGAACGGGACGCTGTCCAACAAC  
CCTTTCTTAAATCAATTAAGTATTGCGTAAGCGTTCTC  
>locus1334  
AGTTTGCAGCGCTAATGAGCTGGCAAGATAATTAGCATTATGTTAATGCGTGACGTGCTCCGCTGACGCTGTAATG  
CATGCGGAGGTTGCCGAGCCAAAGTTGCATGACGTAAC  
>locus1335  
ACAATACGCAAGCATTAAACAATGAATCACAACAAGATATGTATAACAATGATAATCAACAAGATGTTTTTCTATGAA  
AAAAAGAGTGTGCGCCACTCGCAATAGCGGCTCATCCCA  
>locus1336  
CGCCCGCCTCGTACACTTCTATGCGATCAGACTAGCACCCACCACCATAGATAGATGCCAGTATTTATAGCGTT  
TATACATTTATACAATACTTTATATAAAAAATAAGCATCA  
>locus1337  
TTATTTATTAATTTGTCGCGGAAGTCATCAAACTTGAAAATTTAATAAAAAATTTACAGTGAAGCTTTCTCACTCA  
TTTGTCTCTGCGCTCTTTCGCACAATCTTCTGCTTACC  
>locus1338  
GGGTATATCCCGGAATCAGTGCAGATTATTTATACCCTGATCAACATGGGCTGTTGTTGCTGAAAACACGG  
TCTGCGACATTTTTCAGCCAGATAAAGAAATTAACGT  
>locus1339  
ATAGTTCGAAAAATAAATAAAAAATAAACCGGCTTTAGGTATTAATATTTGATCAATAAATTTTCTTCTCTTG  
CACCCTCCCATATATCCCGAGGATAGATCGCGCTG  
>locus1340  
GTTTCTCAGGAGGTCAGTGAAGTGCAGCGTCAAGTTGAAGCCAAACCCCCCAATGCATCGCGCGCGCGCGCGG  
CGCTTCCCCCACCATGATTCACGCGCGCGCGCGCGGACGA  
>locus1341

GGATATAGTCGGGAGAGAGAGAGAGAGAGAGAGTGTGTGTCGAGTGTATGTGTCGCGCGCAACGGGATGGCAGTGGGGGT  
CACACTATATTAAGATTGAACCTCCACTGACTCCGCGACGT  
>locus1342  
GAGAGAGAGAGAGAGAGAGAGAGAGAGAGAGTGTGTGTCGAGTGTATGTGTCGCGCGCAACGGGATGGCAGTGGGGGT  
AGCAGTTCCTACTTGATTGCCGCTATCGCTCTGTGTGCT  
>locus1343  
GAGTTCGAAGTAGGTATAGAGGTGCGCGGAGGCCAGGATGAGGGAAGTCGTGGTTTCGCGGTTCGATCGGTTGCGGCTT  
AGGCAAAATTGAGATAGTTCGCAAAACCCAGCCCGCCG  
>locus1344  
CCACGCAAAACAGATCAATGCTCCGCGTTCCAATATAAACAGTATTATTGAACAAAGCGCGCGAGCTTCGCTGTCCG  
CCGAAACGGCTGCTAGGATTTTCGATAAAGCTCGTACGCATC  
>locus1345  
AGGCGCGGATAACACCCTAATTTCCATGTCGATTTACGCTCGTTCGCGAGCGTCCCTAATACCGCGCGGCCAAATATT  
TATGAAGATGTAACCGTTATTTTGATAAAGCGTGCCTTCCC  
>locus1346  
GAAGGAAGCCAGGGGATTACGGACATTAGATTGGGACACGGGCACAATAAACCTATCTGTATAATCTGCCCTGCAGGAA  
TTAACAGCCCTCGAAGGTAGCCACTAACGAAGTAATTA  
>locus1347  
CTTGAATTTGATCGGCATCTGTATGGCCATTAGCATACTGGAATGACGTATCTCCAAATGTTCTCATTAGCCGAAAT  
CATGGGCGGCTTCTTCGCCGAGGCTGGGAATCTCGCTC  
>locus1348  
TTACCTCCAGATAATGCGGCATAATTAAGCAAAATGTAACGTCGCTGGCAATTAACAAATTTATGCGAGCGAGATC  
CGCATCGGGGCTCGCGCGCGCGCGCGAGCTCAGACAC  
>locus1349  
AAGTGAAGAAGAGTAAGAGAAATCTGCGACCGCTGCGAATTTCCCGAATAGTGGATATTTCCCGTTGGTTAAGCCG  
ATCATTGTCGCGGTAAACAGCCGGCTATTGACAGGCTGTA  
>locus1350  
CTCGCCGGATCGGATTCAATTAACACCGCCCTAAACAAATCATTACCGAATGCTCTCAGCGGGGGAAGAGAG  
CGAGAGCTTGAAGCTCCTTCGGAGGTGGTGCCTTTTCCC  
>locus1351  
GAGAGTCTTTATAGTGAACCTATTGATCCAAACAACTCATTTCAAGATACAGTGAAGTCTCCAAGATACTGCTCCT  
ACTCCTCTGTCTTTCGCGCTCCGCTCCTCGAACTCTCC  
>locus1352  
CGGCGCTCGGTGCTTAATGATGTTAAGAAGGGGCTTTAATTTTTCATTAGGAGCCGCGCAACATCAAGGGTTTCT  
TCATTTTTAGCCCGGATACGTCGGGGTGGCGACTCG  
>locus1353  
ATAAGCTGGTTCGCCAGCAGTACAAAATCGCACCGGAAAAGCTCATGAGGACCGCGGCTACGCGCGCTGCCTCGTAAG  
TTAACTCAGGTCAATATAGATGTTTGTACTTTATTTA  
>locus1354  
GGCGTATAATGTTTTATGGCCCGATCAGCCGTAGAAGTGAAGTGTGATAGAACCGCGCAAGCGAAGCGGCAAAAG  
ATCAAAGGCCCATAGAGAGCGGTGTTAGTCTGAGACACA  
>locus1355  
TTACCAATTGTACGCGATAATATAGAATAAATAAATTTACGTCGCGCGGTATCGGTATAATATATCTACGCTGCCAA  
ATGGTACCAGATACAGTCTATATACCCGACGAGTTAT  
>locus1356  
GCCGCGGTTACGCAAGCTGTTGCACCCGATCTGCGCATTCATGCAAAGTCAAAGTCCATCCGTCGTCTGTGCGGCT  
GCTGCGTCGCCCTGTCGCCCGCGGTAGCTTCTAATCT  
>locus1357  
AAGTAGTACGTTTTATGATACCGTGTGTAAGTAATATATATGATGATGATTAGCGATGAATGATTGTAGATACTT  
CCTGTACCTTGAATTTATATGAAGTAGCTGGTAACCTCGG  
>locus1358  
ATACCTAGTGGATGAAGCCACCATGAATTAAGCAGGATGATTGATGCTGGGGCGGTTGCCAGCCGGGCGTACAT  
CCTCCTCCGACTACGTCACGCCCTCACTGTGCGCGCG  
>locus1359  
GTTGATATAATCTGTTATTTCTAGTGTGCAATTTATTAAGCTCAACAACAATCAGCCCTGTGGATGAATGAGGCTAA  
GGTATGTCAAGGTGCATTTGGATCAACGTTACCAGCCATT  
>locus1360  
CAGATATAGCGTGTGTCGCGCTTAATCGTTCCTATGCACTTGGCCGTGCCCATTTGTCGGGTCCATAAATTTAATG  
CCAGATATAATAAGTTACTTGTCTGTCGCGAGCCGCGCAG  
>locus1361  
AACAGTGCAGCCGATACACACGTCGCGCACACAGTGAAGCGAAGCGCCCTTCCCGGTTTCATCATCGATTTTCCCGG  
CTACCAATCGCACGCTCCATTTATCGCATCGATCGCGC  
>locus1362  
AGAAATGAGTGAAGGAAAAGTGCACGTAATAAAGAACATAATAGACGTTGGTCAATCGTTTTATAAGCAAAACTT  
TATTATAGCAATAGTGAACAAATGGATAACTATTAAGACT  
>locus1363  
CGGCAAGAGTTAAATCGGCTTGCCTTTAGCCGATCCCATTAACAACCTCGAGCCGGCTAAGCTTCCGCGAGTGC  
CTGCACTGTGTCAGCGGGCAGTTGCGCGCAGTACTCC  
>locus1364  
GCGGGCGCTCGGCTCTGTCAATAATGACATTTCTCGCATAGTTTCGCCACCCTCTCTCGGGGCGGGGGTGGCCTGG  
CAGTAGCAGCGCGCGCAGCGGTAGAGAGAGAGAGAGAGAG  
>locus1365  
GCCGACACTAAAGGCTTAACGAGCATCTTTGTCTATGCCGTGTGACGCGCGCTCCGAGAGAGAAGAGTAAACAGGA  
CGTGGCTTATCTTGTACGAAAAATCTGCCCAAGAGAGAG  
>locus1366  
GAAAAGGAGCGACCGCTATGATTTATACCCGCGCAAAATCTGTTTCTTCGTCGCGCGCAAGCTAACCCGTTTGCCTTC  
ATCCATCTTTTCCCTTTCACGGCTCACCGAACAGCAGCA  
>locus1367  
TCCTCCTAATGGATAGAGAAATATATACATACTTTATGATCGTTTACTATAATATTATTATGTGATGTTTATGCATA  
CAGTATACGAGGATTTTATCAACGCTAGTCTCCTGCACA  
>locus1368  
TTTTTCATACAGTAGAATGGTTGATGGATATAACACACGAAAAACGTTTTCAAGGTGATACATAATCTACAAGCTATACT  
TTGCATAGAATTAGTGGAGTTTTCCAATAATGCATAAT  
>locus1369  
AATATTCTGTATCCCGATTGTGACACAATATACACTGGTGTATGTTAAATGTGAGAATGTCGTGTTTTATTTTCTTCC  
GATGTAATACCTTCCAGTGTCTTTTGTATGAAAGGAATC  
>locus1370  
TACTTCCTAACTTAATCCGTAACCTCCGACCGCGGCAATCTGACATCCTTTTTATTTTCATTGGCTCGATCGTCCGCT  
GCTCCGACTCGTGCCTCGCTCGAGTTCCTCATAGGATTT  
>locus1371  
AGAGATAGAAACCGGAACCGACATAAACCCTCCCTAGCAGTACCCTCCCTTACTCCACACATATATACAGAGTCGCG  
CTTTGTCGGTCTTCGGACGCAATAGGGTGGTTCTCTC  
>locus1372  
GAGAGAGAGAGAGAGGGGGGAGAGGCTGCCTAAAGGAGGAGAACTCGCGAGCGGACATATCAGGACGACTATCTATC  
GCTGCCCTTACGCTAATGATAAATCGTGTGCGTTAAT  
>locus1373  
TAAGCGGGCTTCTCGCAGTATTTTCCCGCAAAGTGTATTAAGTCTCCCATATTTTGGCCCTTTTCTCTCTGTT  
TTCTGTTTTCCCTGCTATCTTGCATACTACCTCATCC  
>locus1374  
CTACTACTGCTGACCGGCGACACTGGCATCGCGGACGCGCCCTCTCTCTTTTAGAGGTTCTATGAATTTTGCAGAC  
TCAATAAAAAGTGGTTCCACGAGGTTAACATTTTCGGTAA  
>locus1375  
AGTTCTCCTCTCTCCGAGCGCGCTTATATATTTTACTTTTCTAGTATAGCGAATTAACCGCGGTTTCATGCGCAG



>locus1410  
GAAAGTGTGAGAAATGCGAGATAAGTGCCTGAAAAATAGACGGTGGAAAGGAGCAACGATGGAAAAACCGAAGATATACAAA  
TTCTCGACATAGTACAAAGCATTAAACTCTTTTCAAT  
>locus1411  
AGGCAACCACCCTTAACCGAAACCAATAGCCAAAACCTAACCTTATTCTAATTAGGAGCCGACGCGGCGATGCGTCGCTG  
CTTTGCATATTTTCTCGATTAACCTCCCCGCCGACTCGGC  
>locus1412  
GAAGGAGGACGAGAGGTAGATGGTTATATACCTTGGTAGGAGATATAATGTAGCCAGCTGTAGGCAGCGGTAATCACATG  
TTTGTTTAACTCCGAAACCCCTCATCTATACGCGCTGGA  
>locus1413  
TTCTCTCTTGTGCAACAAATCGGTACAAACGATCGTCTGTAAGCAGTTAAGGCCCAAGGGCCCTATAATACTATGCGC  
CGGCATGGAGCTCTCCGTCGAAAGCCAAGATGAGGAGG  
>locus1414  
TGTCTGCAAGCTTCGCCCCATAGAAGACATAGCGCGACGGCAGATACGCCGAGAGAAGCTCCCAAGCCGAAACTCCATTA  
TCCTTAATTATAATCGCGTTTAACTCGCAAACCTCATCGCTG  
>locus1415  
TTTTCGATCGCGCCGAGAAGCGAGAGCGGCGAGGTTATAAGAGGGGAGGAGCGGGTAAGCCGGAGCATTGTAATCAAGT  
AATGTAAGCTTTATGCAAAATACATGTTAGTTAGGAGTGC  
>locus1416  
CGGCCGCAATCGAAAGATAGCGAGTGTCTAATGGCTCGAAATTCCTGCCGCTTTGCGGAATGTCCCGAATGAGAATTAA  
GTCAAGTGGCATCTATAGCCCTCTCTCTCTAGCGGAGA  
>locus1417  
CTAAGGGTTGCGAGGGTGGCGTCCACCACCTCCGTCGCGCCCGCTACGCGCACTCCAGCATCAAGGACTGGGAAC  
GGAGTGCAGGTAATTCGTCGCTCTGCTGCCCGACCGG  
>locus1418  
CGTAATAGTAATTCGTTTCAGTTTCGCGCTCGACCGCCAGCAGCAGCAGCAGCAGCCGAGGTTCCATAATCATCAGA  
TAATTACTTTGGTAATTAATTAACAACCTCCGTTGGCGCTG  
>locus1419  
ATTCCTGAATGCATCTGCCCTATTATGCTCGCCGAGAAAGAGAGAGAGAGAGCTACTCCCGAGACCATTAACTCTC  
GCTAAACGACAGCCATTTGTACCTAAACTGGATTGCCAA  
>locus1420  
ACAAATCCAATTACCAATAAGAGTTTCTCATACGTAACATCATTGCATCTCGTCTTGTCTAAACATTATGGTCCCTAC  
AAAAAATACATTACATCTATAAGCAGTTTATACATTTGTT  
>locus1421  
CGGTTGACGCCATCTTATTTATGTTTAAATATATCAGAATATATCGTTAGAACGCGTGTGAGCCCGCGAATATCCG  
CGAGATTTATGCGCCCGCCGCGCTCTCTCTCTGATTG  
>locus1422  
TCTTTTATCTGGTTTTCCATTTGTTGCAATTAATAACATGCTTTTAAAGGGTTTTTCGTTCAAATATGGTGGTTCTCC  
TTCTATCATTTCAATAGCCATTATACCCAATGACCATATG  
>locus1423  
ACAACATTCATAAAAAAACAACAACAACCTACCGCTGTACCGCTACATCGCGTGACCGCCAGCTTTCGTTATTTAAACG  
ACTATAAATTAATGTTAATTAATCTTATACTTCGTAAT  
>locus1424  
CCTCTCTCACACTCAGCCTGACGGCCATTAAGCAATTTAACGCTTCTCTGCTCGGCAAAAAATACGAGTCGTTGCGCT  
AGACTGAAGAAATGATCGGAGAGGCGCCGCTCGTCAT  
>locus1425  
CCCCAAGGGCTGCTGTGTGTGTGTGTGTGCGTGTGGAAGAGAGTAGAAAAAGAGGGCGCGAGATAACACATTT  
TGACGGTATAAAAAATGAGTGTTTTCCCTGGCCTATCTGG  
>locus1426  
CAAAGCAAACAACGGCATCCGGTTTACTTGTGAATAAACACATATTTATTTTATAGAGCCGCTCGCGGAGTGGGAGCG  
AGGACGGCCTTGACTCGCTTATAACTCGACGCTCTCGAG  
>locus1427  
CGCTCGCGCAGGTAGTTAGGGCTTTTCATCGGAGGGCTTGAGCTTAGCGGAGCTCGAGGGATTACAGCAGACAGTTGGAA  
ATCCGATCAAAAACAAATGGACTGCGAAAATAGCCCGATC  
>locus1428  
GAGACTCGCGAAAGCCGTAAGTGCAGCAAAATCCCGTGCAGACTCGGGTGTGGGTCAAAGGGTTCGGTAAACAAACAG  
TGAAAATAATATAATTTACAGAGGATTAGCCGAGACTCA  
>locus1429  
TGAGCACGGAGTTATCTGTAATGGAATAAGTTGGCAACAATGGCGCATTGTTGAGCGCGGAGCGTCCGCTGACGGACA  
CTATCGCCGGAGGTTGCGTTTCCGCGCTTTTCGTTTCTCTG  
>locus1430  
ATTTCTCTGGAATTTTCCATTGCATAAAAATCTTTTCTTAGCCATCTTTCAACTTGAATGGGTATGGAGCATTATAGT  
ATCTTGATCAAGTGTCTAAGCTCTTAATCCAGAGTTCA  
>locus1431  
TAATGCAGCCGGGGTAAATGGCGTATCTCTGCGCATCTTTTATTAAACGCTCGCCGCTCTCCCGCGCGTGTGTATA  
GAGCCTTGATTCGCGCCGCTGCTGCTGCCGCTCGCGG  
>locus1432  
GGAGAGTCAGGGAGTTTCTCGTGTTCATTTCTGAGCTCTATATAACTTTGCGCTCAACTCGACACCAGATTAATAA  
CGGCCCACTATTCTATATATCCGCGACGAGATGAGCA

## Additional file 6

| my_locus_nb | probe1_name_Faircloth | probe2_name_Faircloth | probe3_name_Faircloth | probe4_name_Faircloth | probe5_name_Faircloth | probe6_name_Faircloth |
|-------------|-----------------------|-----------------------|-----------------------|-----------------------|-----------------------|-----------------------|
| locus0001   | uce-428_p1            | uce-428_p2            | uce-429_p1            | uce-429_p2            | uce-430_p1            | uce-430_p2            |
| locus0002   | uce-1041_p1           | uce-1041_p2           | uce-1042_p1           | uce-1042_p2           |                       |                       |
| locus0003   | uce-1366_p1           | uce-1366_p2           |                       |                       |                       |                       |
| locus0004   | uce-1022_p1           | uce-1022_p2           |                       |                       |                       |                       |
| locus0005   | uce-1019_p1           | uce-1019_p2           |                       |                       |                       |                       |
| locus0006   | uce-1015_p1           | uce-1015_p2           |                       |                       |                       |                       |
| locus0007   | uce-1013_p1           | uce-1013_p2           |                       |                       |                       |                       |
| locus0008   | uce-1008_p1           | uce-1008_p2           |                       |                       |                       |                       |
| locus0009   | uce-1007_p1           | uce-1007_p2           |                       |                       |                       |                       |
| locus0010   | uce-1005_p1           | uce-1005_p2           |                       |                       |                       |                       |
| locus0011   | uce-1004_p1           | uce-1004_p2           |                       |                       |                       |                       |
| locus0012   | uce-966_p1            | uce-966_p2            |                       |                       |                       |                       |
| locus0013   | uce-957_p1            | uce-957_p2            |                       |                       |                       |                       |
| locus0014   | uce-1345_p1           | uce-1345_p2           |                       |                       |                       |                       |
| locus0015   | uce-953_p1            | uce-953_p2            |                       |                       |                       |                       |
| locus0016   | uce-947_p1            | uce-947_p2            |                       |                       |                       |                       |
| locus0017   | uce-946_p1            | uce-946_p2            |                       |                       |                       |                       |
| locus0018   | uce-932_p1            | uce-932_p2            |                       |                       |                       |                       |
| locus0019   | uce-931_p1            | uce-931_p2            |                       |                       |                       |                       |
| locus0020   | uce-928_p1            | uce-928_p2            |                       |                       |                       |                       |
| locus0021   | uce-927_p1            | uce-927_p2            |                       |                       |                       |                       |
| locus0022   | uce-916_p1            | uce-916_p2            |                       |                       |                       |                       |
| locus0023   | uce-913_p1            | uce-913_p2            |                       |                       |                       |                       |
| locus0024   | uce-912_p1            | uce-912_p2            |                       |                       |                       |                       |
| locus0025   | uce-1344_p1           | uce-1344_p2           |                       |                       |                       |                       |
| locus0026   | uce-909_p1            | uce-909_p2            |                       |                       |                       |                       |
| locus0027   | uce-893_p1            | uce-893_p2            |                       |                       |                       |                       |
| locus0028   | uce-888_p1            | uce-888_p2            |                       |                       |                       |                       |
| locus0029   | uce-882_p1            | uce-882_p2            |                       |                       |                       |                       |
| locus0030   | uce-861_p1            | uce-861_p2            |                       |                       |                       |                       |
| locus0031   | uce-859_p1            | uce-859_p2            |                       |                       |                       |                       |

|           |             |             |
|-----------|-------------|-------------|
| locus0032 | uce-844_p1  | uce-844_p2  |
| locus0033 | uce-841_p1  | uce-841_p2  |
| locus0034 | uce-840_p1  | uce-840_p2  |
| locus0035 | uce-832_p1  | uce-832_p2  |
| locus0036 | uce-1343_p1 | uce-1343_p2 |
| locus0037 | uce-822_p1  | uce-822_p2  |
| locus0038 | uce-815_p1  | uce-815_p2  |
| locus0039 | uce-805_p1  | uce-805_p2  |
| locus0040 | uce-804_p1  | uce-804_p2  |
| locus0041 | uce-801_p1  | uce-801_p2  |
| locus0042 | uce-800_p1  | uce-800_p2  |
| locus0043 | uce-785_p1  | uce-785_p2  |
| locus0044 | uce-784_p1  | uce-784_p2  |
| locus0045 | uce-781_p1  | uce-781_p2  |
| locus0046 | uce-779_p1  | uce-779_p2  |
| locus0047 | uce-1342_p1 | uce-1342_p2 |
| locus0048 | uce-774_p1  | uce-774_p2  |
| locus0049 | uce-773_p1  | uce-773_p2  |
| locus0050 | uce-772_p1  | uce-772_p2  |
| locus0051 | uce-770_p1  | uce-770_p2  |
| locus0052 | uce-761_p1  | uce-761_p2  |
| locus0053 | uce-759_p1  | uce-759_p2  |
| locus0054 | uce-749_p1  | uce-749_p2  |
| locus0055 | uce-744_p1  | uce-744_p2  |
| locus0056 | uce-743_p1  | uce-743_p2  |
| locus0057 | uce-735_p1  | uce-735_p2  |
| locus0058 | uce-1337_p1 | uce-1337_p2 |
| locus0059 | uce-723_p1  | uce-723_p2  |
| locus0060 | uce-721_p1  | uce-721_p2  |
| locus0061 | uce-715_p1  | uce-715_p2  |
| locus0062 | uce-713_p1  | uce-713_p2  |
| locus0063 | uce-711_p1  | uce-711_p2  |
| locus0064 | uce-699_p1  | uce-699_p2  |
| locus0065 | uce-691_p1  | uce-691_p2  |

|           |             |             |
|-----------|-------------|-------------|
| locus0066 | uce-687_p1  | uce-687_p2  |
| locus0067 | uce-684_p1  | uce-684_p2  |
| locus0068 | uce-679_p1  | uce-679_p2  |
| locus0069 | uce-1330_p1 | uce-1330_p2 |
| locus0070 | uce-658_p1  | uce-658_p2  |
| locus0071 | uce-656_p1  | uce-656_p2  |
| locus0072 | uce-646_p1  | uce-646_p2  |
| locus0073 | uce-642_p1  | uce-642_p2  |
| locus0074 | uce-640_p1  | uce-640_p2  |
| locus0075 | uce-635_p1  | uce-635_p2  |
| locus0076 | uce-632_p1  | uce-632_p2  |
| locus0077 | uce-631_p1  | uce-631_p2  |
| locus0078 | uce-630_p1  | uce-630_p2  |
| locus0079 | uce-621_p1  | uce-621_p2  |
| locus0080 | uce-1325_p1 | uce-1325_p2 |
| locus0081 | uce-620_p1  | uce-620_p2  |
| locus0082 | uce-616_p1  | uce-616_p2  |
| locus0083 | uce-610_p1  | uce-610_p2  |
| locus0084 | uce-609_p1  | uce-609_p2  |
| locus0085 | uce-606_p1  | uce-606_p2  |
| locus0086 | uce-597_p1  | uce-597_p2  |
| locus0087 | uce-584_p1  | uce-584_p2  |
| locus0088 | uce-580_p1  | uce-580_p2  |
| locus0089 | uce-571_p1  | uce-571_p2  |
| locus0090 | uce-567_p1  | uce-567_p2  |
| locus0091 | uce-1324_p1 | uce-1324_p2 |
| locus0092 | uce-564_p1  | uce-564_p2  |
| locus0093 | uce-561_p1  | uce-561_p2  |
| locus0094 | uce-557_p1  | uce-557_p2  |
| locus0095 | uce-556_p1  | uce-556_p2  |
| locus0096 | uce-552_p1  | uce-552_p2  |
| locus0097 | uce-551_p1  | uce-551_p2  |
| locus0098 | uce-547_p1  | uce-547_p2  |
| locus0099 | uce-544_p1  | uce-544_p2  |

|           |             |             |            |            |
|-----------|-------------|-------------|------------|------------|
| locus0100 | uce-533_p1  | uce-533_p2  |            |            |
| locus0101 | uce-531_p1  | uce-531_p2  |            |            |
| locus0102 | uce-1287_p1 | uce-1287_p2 |            |            |
| locus0103 | uce-528_p1  | uce-528_p2  |            |            |
| locus0104 | uce-523_p1  | uce-523_p2  |            |            |
| locus0105 | uce-518_p1  | uce-518_p2  |            |            |
| locus0106 | uce-514_p1  | uce-514_p2  |            |            |
| locus0107 | uce-506_p1  | uce-506_p2  |            |            |
| locus0108 | uce-499_p1  | uce-499_p2  |            |            |
| locus0109 | uce-498_p1  | uce-498_p2  |            |            |
| locus0110 | uce-497_p1  | uce-497_p2  |            |            |
| locus0111 | uce-492_p1  | uce-492_p2  |            |            |
| locus0112 | uce-483_p1  | uce-483_p2  |            |            |
| locus0113 | uce-825_p1  | uce-825_p2  | uce-826_p1 | uce-826_p2 |
| locus0114 | uce-1278_p1 | uce-1278_p2 |            |            |
| locus0115 | uce-481_p1  | uce-481_p2  |            |            |
| locus0116 | uce-478_p1  | uce-478_p2  |            |            |
| locus0117 | uce-471_p1  | uce-471_p2  |            |            |
| locus0118 | uce-470_p1  | uce-470_p2  |            |            |
| locus0119 | uce-468_p1  | uce-468_p2  |            |            |
| locus0120 | uce-467_p1  | uce-467_p2  |            |            |
| locus0121 | uce-466_p1  | uce-466_p2  |            |            |
| locus0122 | uce-465_p1  | uce-465_p2  |            |            |
| locus0123 | uce-461_p1  | uce-461_p2  |            |            |
| locus0124 | uce-459_p1  | uce-459_p2  |            |            |
| locus0125 | uce-1273_p1 | uce-1273_p2 |            |            |
| locus0126 | uce-458_p1  | uce-458_p2  |            |            |
| locus0127 | uce-453_p1  | uce-453_p2  |            |            |
| locus0128 | uce-436_p1  | uce-436_p2  |            |            |
| locus0129 | uce-431_p1  | uce-431_p2  |            |            |
| locus0130 | uce-424_p1  | uce-424_p2  |            |            |
| locus0131 | uce-416_p1  | uce-416_p2  |            |            |
| locus0132 | uce-415_p1  | uce-415_p2  |            |            |
| locus0133 | uce-413_p1  | uce-413_p2  |            |            |



|           |             |             |
|-----------|-------------|-------------|
| locus0134 | uce-406_p1  | uce-406_p2  |
| locus0135 | uce-401_p1  | uce-401_p2  |
| locus0136 | uce-1261_p1 | uce-1261_p2 |
| locus0137 | uce-397_p1  | uce-397_p2  |
| locus0138 | uce-369_p1  | uce-369_p2  |
| locus0139 | uce-349_p1  | uce-349_p2  |
| locus0140 | uce-348_p1  | uce-348_p2  |
| locus0141 | uce-345_p1  | uce-345_p2  |
| locus0142 | uce-339_p1  | uce-339_p2  |
| locus0143 | uce-337_p1  | uce-337_p2  |
| locus0144 | uce-335_p1  | uce-335_p2  |
| locus0145 | uce-333_p1  | uce-333_p2  |
| locus0146 | uce-330_p1  | uce-330_p2  |
| locus0147 | uce-1258_p1 | uce-1258_p2 |
| locus0148 | uce-320_p1  | uce-320_p2  |
| locus0149 | uce-319_p1  | uce-319_p2  |
| locus0150 | uce-304_p1  | uce-304_p2  |
| locus0151 | uce-296_p1  | uce-296_p2  |
| locus0152 | uce-295_p1  | uce-295_p2  |
| locus0153 | uce-275_p1  | uce-275_p2  |
| locus0154 | uce-269_p1  | uce-269_p2  |
| locus0155 | uce-242_p1  | uce-242_p2  |
| locus0156 | uce-241_p1  | uce-241_p2  |
| locus0157 | uce-240_p1  | uce-240_p2  |
| locus0158 | uce-1257_p1 | uce-1257_p2 |
| locus0159 | uce-237_p1  | uce-237_p2  |
| locus0160 | uce-235_p1  | uce-235_p2  |
| locus0161 | uce-233_p1  | uce-233_p2  |
| locus0162 | uce-228_p1  | uce-228_p2  |
| locus0163 | uce-217_p1  | uce-217_p2  |
| locus0164 | uce-200_p1  | uce-200_p2  |
| locus0165 | uce-199_p1  | uce-199_p2  |
| locus0166 | uce-182_p1  | uce-182_p2  |
| locus0167 | uce-180_p1  | uce-180_p2  |

|           |             |             |
|-----------|-------------|-------------|
| locus0168 | uce-170_p1  | uce-170_p2  |
| locus0169 | uce-1249_p1 | uce-1249_p2 |
| locus0170 | uce-157_p1  | uce-157_p2  |
| locus0171 | uce-148_p1  | uce-148_p2  |
| locus0172 | uce-143_p1  | uce-143_p2  |
| locus0173 | uce-139_p1  | uce-139_p2  |
| locus0174 | uce-115_p1  | uce-115_p2  |
| locus0175 | uce-110_p1  | uce-110_p2  |
| locus0176 | uce-104_p1  | uce-104_p2  |
| locus0177 | uce-98_p1   | uce-98_p2   |
| locus0178 | uce-87_p1   | uce-87_p2   |
| locus0179 | uce-86_p1   | uce-86_p2   |
| locus0180 | uce-1248_p1 | uce-1248_p2 |
| locus0181 | uce-79_p1   | uce-79_p2   |
| locus0182 | uce-78_p1   | uce-78_p2   |
| locus0183 | uce-77_p1   | uce-77_p2   |
| locus0184 | uce-75_p1   | uce-75_p2   |
| locus0185 | uce-74_p1   | uce-74_p2   |
| locus0186 | uce-68_p1   | uce-68_p2   |
| locus0187 | uce-67_p1   | uce-67_p2   |
| locus0188 | uce-64_p1   | uce-64_p2   |
| locus0189 | uce-59_p1   | uce-59_p2   |
| locus0190 | uce-54_p1   | uce-54_p2   |
| locus0191 | uce-1244_p1 | uce-1244_p2 |
| locus0192 | uce-49_p1   | uce-49_p2   |
| locus0193 | uce-44_p1   | uce-44_p2   |
| locus0194 | uce-43_p1   | uce-43_p2   |
| locus0195 | uce-41_p1   | uce-41_p2   |
| locus0196 | uce-34_p1   | uce-34_p2   |
| locus0197 | uce-29_p1   | uce-29_p2   |
| locus0198 | uce-11_p1   | uce-11_p2   |
| locus0199 | uce-9_p1    | uce-9_p2    |
| locus0200 | uce-1387_p1 | uce-1387_p2 |
| locus0201 | uce-666_p1  | uce-666_p2  |

|           |             |             |             |             |
|-----------|-------------|-------------|-------------|-------------|
| locus0202 | uce-1243_p1 | uce-1243_p2 |             |             |
| locus0203 | uce-1080_p1 | uce-1080_p2 |             |             |
| locus0204 |             |             |             |             |
| locus0205 | uce-1237_p1 | uce-1237_p2 |             |             |
| locus0206 | uce-456_p1  | uce-456_p2  | uce-457_p1  | uce-457_p2  |
| locus0207 | uce-1235_p1 | uce-1235_p2 |             |             |
| locus0208 | uce-1233_p1 | uce-1233_p2 |             |             |
| locus0209 | uce-1232_p1 | uce-1232_p2 |             |             |
| locus0210 | uce-1225_p1 | uce-1225_p2 |             |             |
| locus0211 | uce-1213_p1 | uce-1213_p2 |             |             |
| locus0212 | uce-1212_p1 | uce-1212_p2 |             |             |
| locus0213 | uce-1211_p1 | uce-1211_p2 |             |             |
| locus0214 | uce-1200_p1 | uce-1200_p2 |             |             |
| locus0215 | uce-1188_p1 | uce-1188_p2 |             |             |
| locus0216 | uce-1182_p1 | uce-1182_p2 |             |             |
| locus0217 | uce-1164_p1 | uce-1164_p2 | uce-1165_p1 | uce-1165_p2 |
| locus0218 | uce-1181_p1 | uce-1181_p2 |             |             |
| locus0219 | uce-1160_p1 | uce-1160_p2 |             |             |
| locus0220 | uce-1151_p1 | uce-1151_p2 |             |             |
| locus0221 | uce-1149_p1 | uce-1149_p2 |             |             |
| locus0222 | uce-1147_p1 | uce-1147_p2 |             |             |
| locus0223 | uce-1146_p1 | uce-1146_p2 |             |             |
| locus0224 | uce-1134_p1 | uce-1134_p2 |             |             |
| locus0225 | uce-1131_p1 | uce-1131_p2 |             |             |
| locus0226 | uce-1128_p1 | uce-1128_p2 |             |             |
| locus0227 | uce-1124_p1 | uce-1124_p2 |             |             |
| locus0228 | uce-419_p1  | uce-419_p2  | uce-420_p1  | uce-420_p2  |
| locus0229 | uce-1110_p1 | uce-1110_p2 |             |             |
| locus0230 | uce-1099_p1 | uce-1099_p2 |             |             |
| locus0231 | uce-1088_p1 | uce-1088_p2 |             |             |
| locus0232 | uce-1074_p1 | uce-1074_p2 |             |             |
| locus0233 | uce-1066_p1 | uce-1066_p2 |             |             |
| locus0234 | uce-1065_p1 | uce-1065_p2 |             |             |
| locus0235 | uce-1052_p1 | uce-1052_p2 |             |             |

|           |             |             |             |             |
|-----------|-------------|-------------|-------------|-------------|
| locus0236 | uce-1051_p1 | uce-1051_p2 |             |             |
| locus0237 | uce-1050_p1 | uce-1050_p2 |             |             |
| locus0238 | uce-1049_p1 | uce-1049_p2 |             |             |
| locus0239 | uce-1115_p1 | uce-1115_p2 | uce-1116_p1 | uce-1116_p2 |
| locus0240 | uce-1036_p1 | uce-1036_p2 |             |             |
| locus0241 | uce-1029_p1 | uce-1029_p2 |             |             |
| locus0242 | uce-1025_p1 | uce-1025_p2 |             |             |
| locus0243 | uce-996_p1  | uce-996_p2  |             |             |
| locus0244 | uce-991_p1  | uce-991_p2  |             |             |
| locus0245 | uce-990_p1  | uce-990_p2  |             |             |
| locus0246 | uce-988_p1  | uce-988_p2  |             |             |
| locus0247 | uce-987_p1  | uce-987_p2  |             |             |
| locus0248 | uce-976_p1  | uce-976_p2  |             |             |
| locus0249 | uce-975_p1  | uce-975_p2  |             |             |
| locus0250 | uce-311_p1  | uce-311_p2  | uce-312_p1  | uce-312_p2  |
| locus0251 | uce-962_p1  | uce-962_p2  |             |             |
| locus0252 | uce-960_p1  | uce-960_p2  |             |             |
| locus0253 | uce-958_p1  | uce-958_p2  |             |             |
| locus0254 | uce-955_p1  | uce-955_p2  |             |             |
| locus0255 | uce-948_p1  | uce-948_p2  |             |             |
| locus0256 | uce-942_p1  | uce-942_p2  |             |             |
| locus0257 | uce-937_p1  | uce-937_p2  |             |             |
| locus0258 | uce-930_p1  | uce-930_p2  |             |             |
| locus0259 | uce-920_p1  | uce-920_p2  |             |             |
| locus0260 | uce-914_p1  | uce-914_p2  |             |             |
| locus0261 | uce-1100_p1 | uce-1100_p2 | uce-1101_p1 | uce-1101_p2 |
| locus0262 | uce-907_p1  | uce-907_p2  |             |             |
| locus0263 | uce-906_p1  | uce-906_p2  |             |             |
| locus0264 | uce-905_p1  | uce-905_p2  |             |             |
| locus0265 | uce-901_p1  | uce-901_p2  |             |             |
| locus0266 | uce-897_p1  | uce-897_p2  |             |             |
| locus0267 | uce-892_p1  | uce-892_p2  |             |             |
| locus0268 | uce-877_p1  | uce-877_p2  |             |             |
| locus0269 | uce-866_p1  | uce-866_p2  |             |             |

|           |             |             |             |             |            |            |
|-----------|-------------|-------------|-------------|-------------|------------|------------|
| locus0270 | uce-864_p1  | uce-864_p2  |             |             |            |            |
| locus0271 | uce-858_p1  | uce-858_p2  |             |             |            |            |
| locus0272 | uce-1310_p1 | uce-1310_p2 | uce-1311_p1 | uce-1311_p2 |            |            |
| locus0273 | uce-852_p1  | uce-852_p2  |             |             |            |            |
| locus0274 | uce-851_p1  | uce-851_p2  |             |             |            |            |
| locus0275 | uce-848_p1  | uce-848_p2  |             |             |            |            |
| locus0276 | uce-846_p1  | uce-846_p2  |             |             |            |            |
| locus0277 | uce-836_p1  | uce-836_p2  |             |             |            |            |
| locus0278 | uce-835_p1  | uce-835_p2  |             |             |            |            |
| locus0279 | uce-831_p1  | uce-831_p2  |             |             |            |            |
| locus0280 | uce-828_p1  | uce-828_p2  |             |             |            |            |
| locus0281 | uce-823_p1  | uce-823_p2  |             |             |            |            |
| locus0282 | uce-820_p1  | uce-820_p2  |             |             |            |            |
| locus0283 | uce-83_p1   | uce-83_p2   | uce-84_p1   | uce-84_p2   |            |            |
| locus0284 | uce-816_p1  | uce-816_p2  |             |             |            |            |
| locus0285 | uce-812_p1  | uce-812_p2  |             |             |            |            |
| locus0286 | uce-787_p1  | uce-787_p2  |             |             |            |            |
| locus0287 | uce-778_p1  | uce-778_p2  |             |             |            |            |
| locus0288 | uce-764_p1  | uce-764_p2  |             |             |            |            |
| locus0289 | uce-751_p1  | uce-751_p2  |             |             |            |            |
| locus0290 | uce-750_p1  | uce-750_p2  |             |             |            |            |
| locus0291 | uce-745_p1  | uce-745_p2  |             |             |            |            |
| locus0292 | uce-739_p1  | uce-739_p2  |             |             |            |            |
| locus0293 | uce-720_p1  | uce-720_p2  |             |             |            |            |
| locus0294 | uce-729_p1  | uce-729_p2  | uce-730_p1  | uce-730_p2  | uce-731_p1 | uce-731_p2 |
| locus0295 | uce-970_p1  | uce-970_p2  | uce-971_p1  | uce-971_p2  |            |            |
| locus0296 | uce-719_p1  | uce-719_p2  |             |             |            |            |
| locus0297 | uce-710_p1  | uce-710_p2  |             |             |            |            |
| locus0298 | uce-707_p1  | uce-707_p2  |             |             |            |            |
| locus0299 | uce-702_p1  | uce-702_p2  |             |             |            |            |
| locus0300 | uce-690_p1  | uce-690_p2  |             |             |            |            |
| locus0301 | uce-661_p1  | uce-661_p2  |             |             |            |            |
| locus0302 | uce-654_p1  | uce-654_p2  |             |             |            |            |
| locus0303 | uce-650_p1  | uce-650_p2  |             |             |            |            |

|           |            |            |            |            |
|-----------|------------|------------|------------|------------|
| locus0304 | uce-649_p1 | uce-649_p2 |            |            |
| locus0305 | uce-644_p1 | uce-644_p2 |            |            |
| locus0306 | uce-164_p1 | uce-164_p2 | uce-165_p1 | uce-165_p2 |
| locus0307 | uce-643_p1 | uce-643_p2 |            |            |
| locus0308 | uce-638_p1 | uce-638_p2 |            |            |
| locus0309 | uce-615_p1 | uce-615_p2 |            |            |
| locus0310 | uce-614_p1 | uce-614_p2 |            |            |
| locus0311 | uce-607_p1 | uce-607_p2 |            |            |
| locus0312 | uce-601_p1 | uce-601_p2 |            |            |
| locus0313 | uce-594_p1 | uce-594_p2 |            |            |
| locus0314 | uce-589_p1 | uce-589_p2 |            |            |
| locus0315 | uce-582_p1 | uce-582_p2 |            |            |
| locus0316 | uce-577_p1 | uce-577_p2 |            |            |
| locus0317 | uce-890_p1 | uce-890_p2 | uce-891_p1 | uce-891_p2 |
| locus0318 | uce-576_p1 | uce-576_p2 |            |            |
| locus0319 | uce-554_p1 | uce-554_p2 |            |            |
| locus0320 | uce-548_p1 | uce-548_p2 |            |            |
| locus0321 | uce-542_p1 | uce-542_p2 |            |            |
| locus0322 | uce-541_p1 | uce-541_p2 |            |            |
| locus0323 | uce-537_p1 | uce-537_p2 |            |            |
| locus0324 | uce-535_p1 | uce-535_p2 |            |            |
| locus0325 | uce-522_p1 | uce-522_p2 |            |            |
| locus0326 | uce-512_p1 | uce-512_p2 |            |            |
| locus0327 | uce-507_p1 | uce-507_p2 |            |            |
| locus0328 | uce-972_p1 | uce-972_p2 | uce-973_p1 | uce-973_p2 |
| locus0329 | uce-504_p1 | uce-504_p2 |            |            |
| locus0330 | uce-501_p1 | uce-501_p2 |            |            |
| locus0331 | uce-496_p1 | uce-496_p2 |            |            |
| locus0332 | uce-495_p1 | uce-495_p2 |            |            |
| locus0333 | uce-488_p1 | uce-488_p2 |            |            |
| locus0334 | uce-486_p1 | uce-486_p2 |            |            |
| locus0335 | uce-476_p1 | uce-476_p2 |            |            |
| locus0336 | uce-460_p1 | uce-460_p2 |            |            |
| locus0337 | uce-455_p1 | uce-455_p2 |            |            |

|           |             |             |             |             |
|-----------|-------------|-------------|-------------|-------------|
| locus0338 | uce-449_p1  | uce-449_p2  |             |             |
| locus0339 | uce-283_p1  | uce-283_p2  | uce-284_p1  | uce-284_p2  |
| locus0340 | uce-446_p1  | uce-446_p2  |             |             |
| locus0341 | uce-437_p1  | uce-437_p2  |             |             |
| locus0342 | uce-432_p1  | uce-432_p2  |             |             |
| locus0343 | uce-427_p1  | uce-427_p2  |             |             |
| locus0344 | uce-407_p1  | uce-407_p2  |             |             |
| locus0345 | uce-395_p1  | uce-395_p2  |             |             |
| locus0346 | uce-394_p1  | uce-394_p2  |             |             |
| locus0347 | uce-393_p1  | uce-393_p2  |             |             |
| locus0348 | uce-392_p1  | uce-392_p2  |             |             |
| locus0349 | uce-390_p1  | uce-390_p2  |             |             |
| locus0350 | uce-209_p1  | uce-209_p2  | uce-210_p1  | uce-210_p2  |
| locus0351 | uce-379_p1  | uce-379_p2  |             |             |
| locus0352 | uce-374_p1  | uce-374_p2  |             |             |
| locus0353 | uce-367_p1  | uce-367_p2  |             |             |
| locus0354 | uce-366_p1  | uce-366_p2  |             |             |
| locus0355 | uce-360_p1  | uce-360_p2  |             |             |
| locus0356 | uce-359_p1  | uce-359_p2  |             |             |
| locus0357 | uce-342_p1  | uce-342_p2  |             |             |
| locus0358 | uce-334_p1  | uce-334_p2  |             |             |
| locus0359 | uce-329_p1  | uce-329_p2  |             |             |
| locus0360 | uce-327_p1  | uce-327_p2  |             |             |
| locus0361 | uce-1455_p1 | uce-1455_p2 | uce-1456_p1 | uce-1456_p2 |
| locus0362 | uce-307_p1  | uce-307_p2  |             |             |
| locus0363 | uce-303_p1  | uce-303_p2  |             |             |
| locus0364 | uce-301_p1  | uce-301_p2  |             |             |
| locus0365 | uce-299_p1  | uce-299_p2  |             |             |
| locus0366 | uce-297_p1  | uce-297_p2  |             |             |
| locus0367 | uce-291_p1  | uce-291_p2  |             |             |
| locus0368 | uce-278_p1  | uce-278_p2  |             |             |
| locus0369 | uce-267_p1  | uce-267_p2  |             |             |
| locus0370 | uce-265_p1  | uce-265_p2  |             |             |
| locus0371 | uce-258_p1  | uce-258_p2  |             |             |

|           |             |             |             |             |            |            |
|-----------|-------------|-------------|-------------|-------------|------------|------------|
| locus0372 | uce-1389_p1 | uce-1389_p2 | uce-1390_p1 | uce-1390_p2 |            |            |
| locus0373 | uce-257_p1  | uce-257_p2  |             |             |            |            |
| locus0374 | uce-253_p1  | uce-253_p2  |             |             |            |            |
| locus0375 | uce-251_p1  | uce-251_p2  |             |             |            |            |
| locus0376 | uce-250_p1  | uce-250_p2  |             |             |            |            |
| locus0377 | uce-236_p1  | uce-236_p2  |             |             |            |            |
| locus0378 | uce-219_p1  | uce-219_p2  |             |             |            |            |
| locus0379 | uce-213_p1  | uce-213_p2  |             |             |            |            |
| locus0380 | uce-212_p1  | uce-212_p2  |             |             |            |            |
| locus0381 | uce-195_p1  | uce-195_p2  |             |             |            |            |
| locus0382 | uce-189_p1  | uce-189_p2  |             |             |            |            |
| locus0383 | uce-80_p1   | uce-80_p2   | uce-81_p1   | uce-81_p2   |            |            |
| locus0384 | uce-185_p1  | uce-185_p2  |             |             |            |            |
| locus0385 | uce-173_p1  | uce-173_p2  |             |             |            |            |
| locus0386 | uce-171_p1  | uce-171_p2  |             |             |            |            |
| locus0387 | uce-162_p1  | uce-162_p2  |             |             |            |            |
| locus0388 | uce-155_p1  | uce-155_p2  |             |             |            |            |
| locus0389 | uce-150_p1  | uce-150_p2  |             |             |            |            |
| locus0390 | uce-144_p1  | uce-144_p2  |             |             |            |            |
| locus0391 | uce-136_p1  | uce-136_p2  |             |             |            |            |
| locus0392 | uce-132_p1  | uce-132_p2  |             |             |            |            |
| locus0393 | uce-131_p1  | uce-131_p2  |             |             |            |            |
| locus0394 | uce-1153_p1 | uce-1153_p2 | uce-1154_p1 | uce-1154_p2 |            |            |
| locus0395 | uce-122_p1  | uce-122_p2  |             |             |            |            |
| locus0396 | uce-121_p1  | uce-121_p2  |             |             |            |            |
| locus0397 | uce-117_p1  | uce-117_p2  |             |             |            |            |
| locus0398 | uce-116_p1  | uce-116_p2  |             |             |            |            |
| locus0399 | uce-114_p1  | uce-114_p2  |             |             |            |            |
| locus0400 | uce-108_p1  | uce-108_p2  |             |             |            |            |
| locus0401 | uce-100_p1  | uce-100_p2  |             |             |            |            |
| locus0402 | uce-99_p1   | uce-99_p2   |             |             |            |            |
| locus0403 | uce-96_p1   | uce-96_p2   |             |             |            |            |
| locus0404 | uce-60_p1   | uce-60_p2   |             |             |            |            |
| locus0405 | uce-755_p1  | uce-755_p2  | uce-756_p1  | uce-756_p2  | uce-757_p1 | uce-757_p2 |



|           |             |             |             |             |
|-----------|-------------|-------------|-------------|-------------|
| locus0406 | uce-247_p1  | uce-247_p2  | uce-248_p1  | uce-248_p2  |
| locus0407 | uce-55_p1   | uce-55_p2   |             |             |
| locus0408 | uce-53_p1   | uce-53_p2   |             |             |
| locus0409 | uce-48_p1   | uce-48_p2   |             |             |
| locus0410 | uce-46_p1   | uce-46_p2   |             |             |
| locus0411 | uce-38_p1   | uce-38_p2   |             |             |
| locus0412 | uce-35_p1   | uce-35_p2   |             |             |
| locus0413 | uce-33_p1   | uce-33_p2   |             |             |
| locus0414 | uce-27_p1   | uce-27_p2   |             |             |
| locus0415 | uce-21_p1   | uce-21_p2   |             |             |
| locus0416 | uce-20_p1   | uce-20_p2   |             |             |
| locus0417 | uce-281_p1  | uce-281_p2  | uce-282_p1  | uce-282_p2  |
| locus0418 | uce-18_p1   | uce-18_p2   |             |             |
| locus0419 | uce-17_p1   | uce-17_p2   |             |             |
| locus0420 | uce-10_p1   | uce-10_p2   |             |             |
| locus0421 | uce-6_p1    | uce-6_p2    |             |             |
| locus0422 | uce-5_p1    | uce-5_p2    |             |             |
| locus0423 | uce-3_p1    | uce-3_p2    |             |             |
| locus0424 | uce-225_p1  | uce-225_p2  |             |             |
| locus0425 | uce-2_p1    | uce-2_p2    |             |             |
| locus0426 | uce-1508_p1 | uce-1508_p2 |             |             |
| locus0427 | uce-1500_p1 | uce-1500_p2 |             |             |
| locus0428 | uce-1255_p1 | uce-1255_p2 | uce-1256_p1 | uce-1256_p2 |
| locus0429 | uce-1492_p1 | uce-1492_p2 |             |             |
| locus0430 | uce-1487_p1 | uce-1487_p2 |             |             |
| locus0431 | uce-1485_p1 | uce-1485_p2 |             |             |
| locus0432 | uce-1481_p1 | uce-1481_p2 |             |             |
| locus0433 | uce-1475_p1 | uce-1475_p2 |             |             |
| locus0434 | uce-1468_p1 | uce-1468_p2 |             |             |
| locus0435 | uce-1466_p1 | uce-1466_p2 |             |             |
| locus0436 | uce-1465_p1 | uce-1465_p2 |             |             |
| locus0437 | uce-1462_p1 | uce-1462_p2 |             |             |
| locus0438 | uce-1461_p1 | uce-1461_p2 |             |             |
| locus0439 | uce-1270_p1 | uce-1270_p2 | uce-1271_p1 | uce-1271_p2 |

|           |             |             |            |            |
|-----------|-------------|-------------|------------|------------|
| locus0440 | uce-1460_p1 | uce-1460_p2 |            |            |
| locus0441 | uce-1446_p1 | uce-1446_p2 |            |            |
| locus0442 | uce-1443_p1 | uce-1443_p2 |            |            |
| locus0443 | uce-1429_p1 | uce-1429_p2 |            |            |
| locus0444 | uce-1410_p1 | uce-1410_p2 |            |            |
| locus0445 | uce-1409_p1 | uce-1409_p2 |            |            |
| locus0446 | uce-1407_p1 | uce-1407_p2 |            |            |
| locus0447 | uce-1378_p1 | uce-1378_p2 |            |            |
| locus0448 | uce-1376_p1 | uce-1376_p2 |            |            |
| locus0449 | uce-1372_p1 | uce-1372_p2 |            |            |
| locus0450 | uce-667_p1  | uce-667_p2  | uce-668_p1 | uce-668_p2 |
| locus0451 | uce-1352_p1 | uce-1352_p2 |            |            |
| locus0452 | uce-1351_p1 | uce-1351_p2 |            |            |
| locus0453 | uce-1350_p1 | uce-1350_p2 |            |            |
| locus0454 | uce-1348_p1 | uce-1348_p2 |            |            |
| locus0455 | uce-1346_p1 | uce-1346_p2 |            |            |
| locus0456 | uce-1335_p1 | uce-1335_p2 |            |            |
| locus0457 | uce-1333_p1 | uce-1333_p2 |            |            |
| locus0458 | uce-1329_p1 | uce-1329_p2 |            |            |
| locus0459 | uce-1326_p1 | uce-1326_p2 |            |            |
| locus0460 | uce-1319_p1 | uce-1319_p2 |            |            |
| locus0461 | uce-417_p1  | uce-417_p2  | uce-418_p1 | uce-418_p2 |
| locus0462 | uce-1318_p1 | uce-1318_p2 |            |            |
| locus0463 | uce-1315_p1 | uce-1315_p2 |            |            |
| locus0464 | uce-1307_p1 | uce-1307_p2 |            |            |
| locus0465 | uce-1296_p1 | uce-1296_p2 |            |            |
| locus0466 | uce-1286_p1 | uce-1286_p2 |            |            |
| locus0467 | uce-1284_p1 | uce-1284_p2 |            |            |
| locus0468 | uce-1282_p1 | uce-1282_p2 |            |            |
| locus0469 | uce-1281_p1 | uce-1281_p2 |            |            |
| locus0470 | uce-1280_p1 | uce-1280_p2 |            |            |
| locus0471 | uce-1279_p1 | uce-1279_p2 |            |            |
| locus0472 | uce-61_p1   | uce-61_p2   | uce-62_p1  | uce-62_p2  |
| locus0473 | uce-1253_p1 | uce-1253_p2 |            |            |

|           |             |             |             |             |
|-----------|-------------|-------------|-------------|-------------|
| locus0474 | uce-1252_p1 | uce-1252_p2 |             |             |
| locus0475 | uce-1247_p1 | uce-1247_p2 |             |             |
| locus0476 | uce-1242_p1 | uce-1242_p2 |             |             |
| locus0477 | uce-1240_p1 | uce-1240_p2 |             |             |
| locus0478 | uce-1239_p1 | uce-1239_p2 |             |             |
| locus0479 | uce-1231_p1 | uce-1231_p2 |             |             |
| locus0480 | uce-1228_p1 | uce-1228_p2 |             |             |
| locus0481 | uce-1220_p1 | uce-1220_p2 |             |             |
| locus0482 | uce-1218_p1 | uce-1218_p2 |             |             |
| locus0483 | uce-439_p1  | uce-439_p2  | uce-440_p1  | uce-440_p2  |
| locus0484 | uce-1217_p1 | uce-1217_p2 |             |             |
| locus0485 | uce-1215_p1 | uce-1215_p2 |             |             |
| locus0486 | uce-1214_p1 | uce-1214_p2 |             |             |
| locus0487 | uce-1203_p1 | uce-1203_p2 |             |             |
| locus0488 | uce-1201_p1 | uce-1201_p2 |             |             |
| locus0489 | uce-1199_p1 | uce-1199_p2 |             |             |
| locus0490 | uce-1196_p1 | uce-1196_p2 |             |             |
| locus0491 | uce-1193_p1 | uce-1193_p2 |             |             |
| locus0492 | uce-1184_p1 | uce-1184_p2 |             |             |
| locus0493 | uce-1175_p1 | uce-1175_p2 |             |             |
| locus0494 | uce-444_p1  | uce-444_p2  | uce-445_p1  | uce-445_p2  |
| locus0495 | uce-1169_p1 | uce-1169_p2 |             |             |
| locus0496 | uce-1163_p1 | uce-1163_p2 |             |             |
| locus0497 | uce-1162_p1 | uce-1162_p2 |             |             |
| locus0498 | uce-1148_p1 | uce-1148_p2 |             |             |
| locus0499 | uce-1144_p1 | uce-1144_p2 |             |             |
| locus0500 | uce-1136_p1 | uce-1136_p2 |             |             |
| locus0501 | uce-1133_p1 | uce-1133_p2 |             |             |
| locus0502 | uce-1127_p1 | uce-1127_p2 |             |             |
| locus0503 | uce-1121_p1 | uce-1121_p2 |             |             |
| locus0504 | uce-1120_p1 | uce-1120_p2 |             |             |
| locus0505 | uce-1470_p1 | uce-1470_p2 | uce-1471_p1 | uce-1471_p2 |
| locus0506 | uce-1119_p1 | uce-1119_p2 |             |             |
| locus0507 | uce-1111_p1 | uce-1111_p2 |             |             |

|           |             |             |             |             |             |             |
|-----------|-------------|-------------|-------------|-------------|-------------|-------------|
| locus0508 | uce-1106_p1 | uce-1106_p2 |             |             |             |             |
| locus0509 | uce-1104_p1 | uce-1104_p2 |             |             |             |             |
| locus0510 | uce-1095_p1 | uce-1095_p2 |             |             |             |             |
| locus0511 | uce-1094_p1 | uce-1094_p2 |             |             |             |             |
| locus0512 | uce-1093_p1 | uce-1093_p2 |             |             |             |             |
| locus0513 | uce-1083_p1 | uce-1083_p2 |             |             |             |             |
| locus0514 | uce-1077_p1 | uce-1077_p2 |             |             |             |             |
| locus0515 | uce-1076_p1 | uce-1076_p2 |             |             |             |             |
| locus0516 | uce-1412_p1 | uce-1412_p2 | uce-1413_p1 | uce-1413_p2 | uce-1414_p1 | uce-1414_p2 |
| locus0517 | uce-1000_p1 | uce-1000_p2 | uce-1001_p1 | uce-1001_p2 |             |             |
| locus0518 | uce-1063_p1 | uce-1063_p2 |             |             |             |             |
| locus0519 | uce-1061_p1 | uce-1061_p2 |             |             |             |             |
| locus0520 | uce-1058_p1 | uce-1058_p2 |             |             |             |             |
| locus0521 | uce-1053_p1 | uce-1053_p2 |             |             |             |             |
| locus0522 | uce-1048_p1 | uce-1048_p2 |             |             |             |             |
| locus0523 | uce-1037_p1 | uce-1037_p2 |             |             |             |             |
| locus0524 | uce-1034_p1 | uce-1034_p2 |             |             |             |             |
| locus0525 | uce-1031_p1 | uce-1031_p2 |             |             |             |             |
| locus0526 | uce-1030_p1 | uce-1030_p2 |             |             |             |             |
| locus0527 | uce-1026_p1 | uce-1026_p2 |             |             |             |             |
| locus0528 | uce-1043_p1 | uce-1043_p2 | uce-1044_p1 | uce-1044_p2 |             |             |
| locus0529 | uce-1024_p1 | uce-1024_p2 |             |             |             |             |
| locus0530 | uce-1020_p1 | uce-1020_p2 |             |             |             |             |
| locus0531 | uce-1016_p1 | uce-1016_p2 |             |             |             |             |
| locus0532 | uce-1012_p1 | uce-1012_p2 |             |             |             |             |
| locus0533 | uce-1010_p1 | uce-1010_p2 |             |             |             |             |
| locus0534 | uce-998_p1  | uce-998_p2  |             |             |             |             |
| locus0535 | uce-993_p1  | uce-993_p2  |             |             |             |             |
| locus0536 | uce-989_p1  | uce-989_p2  |             |             |             |             |
| locus0537 | uce-985_p1  | uce-985_p2  |             |             |             |             |
| locus0538 | uce-984_p1  | uce-984_p2  |             |             |             |             |
| locus0539 | uce-286_p1  | uce-286_p2  | uce-287_p1  | uce-287_p2  |             |             |
| locus0540 | uce-978_p1  | uce-978_p2  |             |             |             |             |
| locus0541 | uce-963_p1  | uce-963_p2  |             |             |             |             |

|           |             |             |             |             |
|-----------|-------------|-------------|-------------|-------------|
| locus0542 | uce-956_p1  | uce-956_p2  |             |             |
| locus0543 | uce-952_p1  | uce-952_p2  |             |             |
| locus0544 | uce-950_p1  | uce-950_p2  |             |             |
| locus0545 | uce-949_p1  | uce-949_p2  |             |             |
| locus0546 | uce-941_p1  | uce-941_p2  |             |             |
| locus0547 | uce-940_p1  | uce-940_p2  |             |             |
| locus0548 | uce-936_p1  | uce-936_p2  |             |             |
| locus0549 | uce-934_p1  | uce-934_p2  |             |             |
| locus0550 | uce-703_p1  | uce-703_p2  | uce-704_p1  | uce-704_p2  |
| locus0551 | uce-925_p1  | uce-925_p2  |             |             |
| locus0552 | uce-923_p1  | uce-923_p2  |             |             |
| locus0553 | uce-918_p1  | uce-918_p2  |             |             |
| locus0554 | uce-915_p1  | uce-915_p2  |             |             |
| locus0555 | uce-899_p1  | uce-899_p2  |             |             |
| locus0556 | uce-898_p1  | uce-898_p2  |             |             |
| locus0557 | uce-886_p1  | uce-886_p2  |             |             |
| locus0558 | uce-875_p1  | uce-875_p2  |             |             |
| locus0559 | uce-873_p1  | uce-873_p2  |             |             |
| locus0560 | uce-870_p1  | uce-870_p2  |             |             |
| locus0561 | uce-1039_p1 | uce-1039_p2 | uce-1040_p1 | uce-1040_p2 |
| locus0562 | uce-856_p1  | uce-856_p2  |             |             |
| locus0563 | uce-850_p1  | uce-850_p2  |             |             |
| locus0564 | uce-849_p1  | uce-849_p2  |             |             |
| locus0565 | uce-837_p1  | uce-837_p2  |             |             |
| locus0566 | uce-833_p1  | uce-833_p2  |             |             |
| locus0567 | uce-830_p1  | uce-830_p2  |             |             |
| locus0568 | uce-824_p1  | uce-824_p2  |             |             |
| locus0569 | uce-819_p1  | uce-819_p2  |             |             |
| locus0570 | uce-811_p1  | uce-811_p2  |             |             |
| locus0571 | uce-803_p1  | uce-803_p2  |             |             |
| locus0572 | uce-622_p1  | uce-622_p2  | uce-623_p1  | uce-623_p2  |
| locus0573 | uce-789_p1  | uce-789_p2  |             |             |
| locus0574 | uce-786_p1  | uce-786_p2  |             |             |
| locus0575 | uce-777_p1  | uce-777_p2  |             |             |

|           |             |             |             |             |
|-----------|-------------|-------------|-------------|-------------|
| locus0576 | uce-767_p1  | uce-767_p2  |             |             |
| locus0577 | uce-997_p1  | uce-997_p2  |             |             |
| locus0578 | uce-754_p1  | uce-754_p2  |             |             |
| locus0579 | uce-753_p1  | uce-753_p2  |             |             |
| locus0580 | uce-752_p1  | uce-752_p2  |             |             |
| locus0581 | uce-747_p1  | uce-747_p2  |             |             |
| locus0582 | uce-746_p1  | uce-746_p2  |             |             |
| locus0583 | uce-376_p1  | uce-376_p2  | uce-377_p1  | uce-377_p2  |
| locus0584 | uce-738_p1  | uce-738_p2  |             |             |
| locus0585 | uce-737_p1  | uce-737_p2  |             |             |
| locus0586 | uce-736_p1  | uce-736_p2  |             |             |
| locus0587 | uce-722_p1  | uce-722_p2  |             |             |
| locus0588 | uce-718_p1  | uce-718_p2  |             |             |
| locus0589 | uce-716_p1  | uce-716_p2  |             |             |
| locus0590 | uce-714_p1  | uce-714_p2  |             |             |
| locus0591 | uce-709_p1  | uce-709_p2  |             |             |
| locus0592 | uce-708_p1  | uce-708_p2  |             |             |
| locus0593 | uce-692_p1  | uce-692_p2  |             |             |
| locus0594 | uce-1448_p1 | uce-1448_p2 | uce-1449_p1 | uce-1449_p2 |
| locus0595 | uce-689_p1  | uce-689_p2  |             |             |
| locus0596 | uce-688_p1  | uce-688_p2  |             |             |
| locus0597 | uce-678_p1  | uce-678_p2  |             |             |
| locus0598 | uce-675_p1  | uce-675_p2  |             |             |
| locus0599 | uce-673_p1  | uce-673_p2  |             |             |
| locus0600 | uce-672_p1  | uce-672_p2  |             |             |
| locus0601 | uce-665_p1  | uce-665_p2  |             |             |
| locus0602 | uce-663_p1  | uce-663_p2  |             |             |
| locus0603 | uce-657_p1  | uce-657_p2  |             |             |
| locus0604 | uce-655_p1  | uce-655_p2  |             |             |
| locus0605 | uce-1488_p1 | uce-1488_p2 | uce-1489_p1 | uce-1489_p2 |
| locus0606 | uce-645_p1  | uce-645_p2  |             |             |
| locus0607 | uce-641_p1  | uce-641_p2  |             |             |
| locus0608 | uce-634_p1  | uce-634_p2  |             |             |
| locus0609 | uce-633_p1  | uce-633_p2  |             |             |

|           |             |             |             |             |
|-----------|-------------|-------------|-------------|-------------|
| locus0610 | uce-629_p1  | uce-629_p2  |             |             |
| locus0611 | uce-627_p1  | uce-627_p2  |             |             |
| locus0612 | uce-625_p1  | uce-625_p2  |             |             |
| locus0613 | uce-624_p1  | uce-624_p2  |             |             |
| locus0614 | uce-611_p1  | uce-611_p2  |             |             |
| locus0615 | uce-608_p1  | uce-608_p2  |             |             |
| locus0616 | uce-1186_p1 | uce-1186_p2 | uce-1187_p1 | uce-1187_p2 |
| locus0617 | uce-596_p1  | uce-596_p2  |             |             |
| locus0618 | uce-595_p1  | uce-595_p2  |             |             |
| locus0619 | uce-590_p1  | uce-590_p2  |             |             |
| locus0620 | uce-588_p1  | uce-588_p2  |             |             |
| locus0621 | uce-581_p1  | uce-581_p2  |             |             |
| locus0622 | uce-574_p1  | uce-574_p2  |             |             |
| locus0623 | uce-566_p1  | uce-566_p2  |             |             |
| locus0624 | uce-560_p1  | uce-560_p2  |             |             |
| locus0625 | uce-553_p1  | uce-553_p2  |             |             |
| locus0626 | uce-550_p1  | uce-550_p2  |             |             |
| locus0627 | uce-765_p1  | uce-765_p2  | uce-76_p1   | uce-76_p2   |
| locus0628 | uce-724_p1  | uce-724_p2  | uce-725_p1  | uce-725_p2  |
| locus0629 | uce-543_p1  | uce-543_p2  |             |             |
| locus0630 | uce-540_p1  | uce-540_p2  |             |             |
| locus0631 | uce-539_p1  | uce-539_p2  |             |             |
| locus0632 | uce-536_p1  | uce-536_p2  |             |             |
| locus0633 | uce-529_p1  | uce-529_p2  |             |             |
| locus0634 | uce-526_p1  | uce-526_p2  |             |             |
| locus0635 | uce-524_p1  | uce-524_p2  |             |             |
| locus0636 | uce-521_p1  | uce-521_p2  |             |             |
| locus0637 | uce-517_p1  | uce-517_p2  |             |             |
| locus0638 | uce-515_p1  | uce-515_p2  |             |             |
| locus0639 | uce-894_p1  | uce-894_p2  | uce-895_p1  | uce-895_p2  |
| locus0640 | uce-513_p1  | uce-513_p2  |             |             |
| locus0641 | uce-511_p1  | uce-511_p2  |             |             |
| locus0642 | uce-509_p1  | uce-509_p2  |             |             |
| locus0643 | uce-508_p1  | uce-508_p2  |             |             |

|           |             |             |             |             |
|-----------|-------------|-------------|-------------|-------------|
| locus0644 | uce-505_p1  | uce-505_p2  |             |             |
| locus0645 | uce-503_p1  | uce-503_p2  |             |             |
| locus0646 | uce-500_p1  | uce-500_p2  |             |             |
| locus0647 | uce-491_p1  | uce-491_p2  |             |             |
| locus0648 | uce-480_p1  | uce-480_p2  |             |             |
| locus0649 | uce-479_p1  | uce-479_p2  |             |             |
| locus0650 | uce-25_p1   | uce-25_p2   | uce-26_p1   | uce-26_p2   |
| locus0651 | uce-475_p1  | uce-475_p2  |             |             |
| locus0652 | uce-472_p1  | uce-472_p2  |             |             |
| locus0653 | uce-8_p1    | uce-8_p2    |             |             |
| locus0654 | uce-441_p1  | uce-441_p2  |             |             |
| locus0655 | uce-422_p1  | uce-422_p2  |             |             |
| locus0656 | uce-409_p1  | uce-409_p2  |             |             |
| locus0657 | uce-404_p1  | uce-404_p2  |             |             |
| locus0658 | uce-403_p1  | uce-403_p2  |             |             |
| locus0659 | uce-400_p1  | uce-400_p2  |             |             |
| locus0660 | uce-391_p1  | uce-391_p2  |             |             |
| locus0661 | uce-585_p1  | uce-585_p2  | uce-586_p1  | uce-586_p2  |
| locus0662 | uce-389_p1  | uce-389_p2  |             |             |
| locus0663 | uce-388_p1  | uce-388_p2  |             |             |
| locus0664 | uce-386_p1  | uce-386_p2  |             |             |
| locus0665 | uce-383_p1  | uce-383_p2  |             |             |
| locus0666 | uce-380_p1  | uce-380_p2  |             |             |
| locus0667 | uce-375_p1  | uce-375_p2  |             |             |
| locus0668 | uce-373_p1  | uce-373_p2  |             |             |
| locus0669 | uce-370_p1  | uce-370_p2  |             |             |
| locus0670 | uce-364_p1  | uce-364_p2  |             |             |
| locus0671 | uce-363_p1  | uce-363_p2  |             |             |
| locus0672 | uce-1264_p1 | uce-1264_p2 | uce-1265_p1 | uce-1265_p2 |
| locus0673 | uce-350_p1  | uce-350_p2  |             |             |
| locus0674 | uce-347_p1  | uce-347_p2  |             |             |
| locus0675 | uce-344_p1  | uce-344_p2  |             |             |
| locus0676 | uce-343_p1  | uce-343_p2  |             |             |
| locus0677 | uce-340_p1  | uce-340_p2  |             |             |



|           |             |             |             |             |
|-----------|-------------|-------------|-------------|-------------|
| locus0678 | uce-338_p1  | uce-338_p2  |             |             |
| locus0679 | uce-332_p1  | uce-332_p2  |             |             |
| locus0680 | uce-328_p1  | uce-328_p2  |             |             |
| locus0681 | uce-326_p1  | uce-326_p2  |             |             |
| locus0682 | uce-325_p1  | uce-325_p2  |             |             |
| locus0683 | uce-1370_p1 | uce-1370_p2 | uce-1371_p1 | uce-1371_p2 |
| locus0684 | uce-321_p1  | uce-321_p2  |             |             |
| locus0685 | uce-317_p1  | uce-317_p2  |             |             |
| locus0686 | uce-316_p1  | uce-316_p2  |             |             |
| locus0687 | uce-315_p1  | uce-315_p2  |             |             |
| locus0688 | uce-313_p1  | uce-313_p2  |             |             |
| locus0689 | uce-310_p1  | uce-310_p2  |             |             |
| locus0690 | uce-309_p1  | uce-309_p2  |             |             |
| locus0691 | uce-308_p1  | uce-308_p2  |             |             |
| locus0692 | uce-305_p1  | uce-305_p2  |             |             |
| locus0693 | uce-302_p1  | uce-302_p2  |             |             |
| locus0694 | uce-1418_p1 | uce-1418_p2 | uce-292_p1  |             |
| locus0695 | uce-293_p1  | uce-293_p2  |             |             |
| locus0696 | uce-288_p1  | uce-288_p2  |             |             |
| locus0697 | uce-274_p1  | uce-274_p2  |             |             |
| locus0698 | uce-271_p1  | uce-271_p2  |             |             |
| locus0699 | uce-261_p1  | uce-261_p2  |             |             |
| locus0700 | uce-260_p1  | uce-260_p2  |             |             |
| locus0701 | uce-259_p1  | uce-259_p2  |             |             |
| locus0702 | uce-256_p1  | uce-256_p2  |             |             |
| locus0703 | uce-254_p1  | uce-254_p2  |             |             |
| locus0704 | uce-243_p1  | uce-243_p2  |             |             |
| locus0705 | uce-1363_p1 |             | uce-1364_p1 | uce-1364_p2 |
| locus0706 | uce-239_p1  | uce-239_p2  |             |             |
| locus0707 | uce-234_p1  | uce-234_p2  |             |             |
| locus0708 | uce-232_p1  | uce-232_p2  |             |             |
| locus0709 | uce-230_p1  | uce-230_p2  |             |             |
| locus0710 | uce-229_p1  | uce-229_p2  |             |             |
| locus0711 | uce-226_p1  | uce-226_p2  |             |             |

|           |            |            |            |            |
|-----------|------------|------------|------------|------------|
| locus0712 | uce-224_p1 | uce-224_p2 |            |            |
| locus0713 | uce-206_p1 | uce-206_p2 |            |            |
| locus0714 | uce-205_p1 | uce-205_p2 |            |            |
| locus0715 | uce-201_p1 | uce-201_p2 |            |            |
| locus0716 | uce-362_p1 | uce-362_p2 |            | uce-705_p2 |
| locus0717 | uce-191_p1 | uce-191_p2 |            |            |
| locus0718 | uce-186_p1 | uce-186_p2 |            |            |
| locus0719 | uce-181_p1 | uce-181_p2 |            |            |
| locus0720 | uce-174_p1 | uce-174_p2 |            |            |
| locus0721 | uce-172_p1 | uce-172_p2 |            |            |
| locus0722 | uce-169_p1 | uce-169_p2 |            |            |
| locus0723 | uce-167_p1 | uce-167_p2 |            |            |
| locus0724 | uce-160_p1 | uce-160_p2 |            |            |
| locus0725 | uce-159_p1 | uce-159_p2 |            |            |
| locus0726 | uce-146_p1 | uce-146_p2 |            |            |
| locus0727 |            | uce-15_p2  | uce-16_p1  | uce-16_p2  |
| locus0728 | uce-145_p1 | uce-145_p2 |            |            |
| locus0729 | uce-130_p1 | uce-130_p2 |            |            |
| locus0730 | uce-129_p1 | uce-129_p2 |            |            |
| locus0731 | uce-127_p1 | uce-127_p2 |            |            |
| locus0732 | uce-126_p1 | uce-126_p2 |            |            |
| locus0733 | uce-125_p1 | uce-125_p2 |            |            |
| locus0734 | uce-120_p1 | uce-120_p2 |            |            |
| locus0735 | uce-118_p1 | uce-118_p2 |            |            |
| locus0736 | uce-95_p1  | uce-95_p2  |            |            |
| locus0737 | uce-88_p1  | uce-88_p2  |            |            |
| locus0738 | uce-178_p1 | uce-178_p2 | uce-179_p1 | uce-179_p2 |
| locus0739 |            | uce-943_p2 | uce-944_p1 | uce-944_p2 |
| locus0740 | uce-73_p1  | uce-73_p2  |            |            |
| locus0741 | uce-72_p1  | uce-72_p2  |            |            |
| locus0742 | uce-71_p1  | uce-71_p2  |            |            |
| locus0743 | uce-70_p1  | uce-70_p2  |            |            |
| locus0744 | uce-69_p1  | uce-69_p2  |            |            |
| locus0745 | uce-65_p1  | uce-65_p2  |            |            |

|           |             |             |             |             |
|-----------|-------------|-------------|-------------|-------------|
| locus0746 | uce-52_p1   | uce-52_p2   |             |             |
| locus0747 | uce-47_p1   | uce-47_p2   |             |             |
| locus0748 | uce-45_p1   | uce-45_p2   |             |             |
| locus0749 | uce-42_p1   | uce-42_p2   |             |             |
| locus0750 | uce-202_p1  | uce-202_p2  | uce-203_p1  |             |
| locus0751 | uce-39_p1   | uce-39_p2   |             |             |
| locus0752 | uce-28_p1   | uce-28_p2   |             |             |
| locus0753 | uce-23_p1   | uce-23_p2   |             |             |
| locus0754 | uce-22_p1   | uce-22_p2   |             |             |
| locus0755 | uce-13_p1   | uce-13_p2   |             |             |
| locus0756 | uce-1223_p1 | uce-1223_p2 |             |             |
| locus0757 | uce-734_p1  | uce-734_p2  |             |             |
| locus0758 | uce-1510_p1 | uce-1510_p2 |             |             |
| locus0759 | uce-1497_p1 | uce-1497_p2 |             |             |
| locus0760 | uce-1495_p1 | uce-1495_p2 |             |             |
| locus0761 | uce-1017_p1 | uce-1017_p2 | uce-1018_p1 |             |
| locus0762 | uce-1484_p1 | uce-1484_p2 |             |             |
| locus0763 | uce-1478_p1 | uce-1478_p2 |             |             |
| locus0764 | uce-1476_p1 | uce-1476_p2 |             |             |
| locus0765 | uce-1472_p1 | uce-1472_p2 |             |             |
| locus0766 | uce-1467_p1 | uce-1467_p2 |             |             |
| locus0767 | uce-1464_p1 | uce-1464_p2 |             |             |
| locus0768 | uce-1463_p1 | uce-1463_p2 |             |             |
| locus0769 | uce-1457_p1 | uce-1457_p2 |             |             |
| locus0770 | uce-1452_p1 | uce-1452_p2 |             |             |
| locus0771 | uce-1450_p1 | uce-1450_p2 |             |             |
| locus0772 |             | uce-1355_p2 | uce-1356_p1 | uce-1356_p2 |
| locus0773 | uce-1442_p1 | uce-1442_p2 |             |             |
| locus0774 | uce-1439_p1 | uce-1439_p2 |             |             |
| locus0775 | uce-1438_p1 | uce-1438_p2 |             |             |
| locus0776 | uce-1433_p1 | uce-1433_p2 |             |             |
| locus0777 | uce-1431_p1 | uce-1431_p2 |             |             |
| locus0778 | uce-1428_p1 | uce-1428_p2 |             |             |
| locus0779 | uce-1427_p1 | uce-1427_p2 |             |             |

|           |             |             |             |             |
|-----------|-------------|-------------|-------------|-------------|
| locus0780 | uce-1423_p1 | uce-1423_p2 |             |             |
| locus0781 | uce-1422_p1 | uce-1422_p2 |             |             |
| locus0782 | uce-1421_p1 | uce-1421_p2 |             |             |
| locus0783 |             | uce-1435_p2 | uce-1436_p1 | uce-1436_p2 |
| locus0784 | uce-1420_p1 | uce-1420_p2 |             |             |
| locus0785 | uce-1417_p1 | uce-1417_p2 |             |             |
| locus0786 | uce-1415_p1 | uce-1415_p2 |             |             |
| locus0787 | uce-1408_p1 | uce-1408_p2 |             |             |
| locus0788 | uce-1403_p1 | uce-1403_p2 |             |             |
| locus0789 | uce-1399_p1 | uce-1399_p2 |             |             |
| locus0790 | uce-1397_p1 | uce-1397_p2 |             |             |
| locus0791 | uce-1392_p1 | uce-1392_p2 |             |             |
| locus0792 | uce-1383_p1 | uce-1383_p2 |             |             |
| locus0793 | uce-1382_p1 | uce-1382_p2 |             |             |
| locus0794 |             | uce-578_p2  | uce-579_p1  | uce-579_p2  |
| locus0795 | uce-1381_p1 | uce-1381_p2 |             |             |
| locus0796 | uce-1380_p1 | uce-1380_p2 |             |             |
| locus0797 | uce-1379_p1 | uce-1379_p2 |             |             |
| locus0798 | uce-1375_p1 | uce-1375_p2 |             |             |
| locus0799 | uce-1361_p1 | uce-1361_p2 |             |             |
| locus0800 | uce-1360_p1 | uce-1360_p2 |             |             |
| locus0801 | uce-1359_p1 | uce-1359_p2 |             |             |
| locus0802 | uce-1358_p1 | uce-1358_p2 |             |             |
| locus0803 | uce-1349_p1 | uce-1349_p2 |             |             |
| locus0804 | uce-1328_p1 | uce-1328_p2 |             |             |
| locus0805 | uce-813_p1  | uce-813_p2  | uce-814_p1  |             |
| locus0806 | uce-1322_p1 | uce-1322_p2 |             |             |
| locus0807 | uce-1314_p1 | uce-1314_p2 |             |             |
| locus0808 | uce-1313_p1 | uce-1313_p2 |             |             |
| locus0809 | uce-1308_p1 | uce-1308_p2 |             |             |
| locus0810 | uce-1305_p1 | uce-1305_p2 |             |             |
| locus0811 | uce-1298_p1 | uce-1298_p2 |             |             |
| locus0812 | uce-1293_p1 | uce-1293_p2 |             |             |
| locus0813 | uce-1275_p1 | uce-1275_p2 |             |             |

|           |             |             |             |             |
|-----------|-------------|-------------|-------------|-------------|
| locus0814 | uce-1274_p1 | uce-1274_p2 |             |             |
| locus0815 | uce-1266_p1 | uce-1266_p2 |             |             |
| locus0816 | uce-1505_p1 | uce-1505_p2 | uce-1506_p1 |             |
| locus0817 | uce-1262_p1 | uce-1262_p2 |             |             |
| locus0818 | uce-1260_p1 | uce-1260_p2 |             |             |
| locus0819 | uce-1259_p1 | uce-1259_p2 |             |             |
| locus0820 | uce-1245_p1 | uce-1245_p2 |             |             |
| locus0821 | uce-1241_p1 | uce-1241_p2 |             |             |
| locus0822 | uce-1236_p1 | uce-1236_p2 |             |             |
| locus0823 | uce-1234_p1 | uce-1234_p2 |             |             |
| locus0824 | uce-1222_p1 | uce-1222_p2 |             |             |
| locus0825 | uce-1219_p1 | uce-1219_p2 |             |             |
| locus0826 | uce-1208_p1 | uce-1208_p2 |             |             |
| locus0827 |             | uce-1250_p2 | uce-1251_p1 | uce-1251_p2 |
| locus0828 | uce-1207_p1 | uce-1207_p2 |             |             |
| locus0829 | uce-1194_p1 | uce-1194_p2 |             |             |
| locus0830 | uce-1191_p1 | uce-1191_p2 |             |             |
| locus0831 | uce-1178_p1 | uce-1178_p2 |             |             |
| locus0832 | uce-1177_p1 | uce-1177_p2 |             |             |
| locus0833 | uce-1174_p1 | uce-1174_p2 |             |             |
| locus0834 | uce-1173_p1 | uce-1173_p2 |             |             |
| locus0835 | uce-1161_p1 | uce-1161_p2 |             |             |
| locus0836 | uce-1156_p1 | uce-1156_p2 |             |             |
| locus0837 | uce-1155_p1 | uce-1155_p2 |             |             |
| locus0838 | uce-994_p1  | uce-994_p2  | uce-995_p1  |             |
| locus0839 | uce-1142_p1 | uce-1142_p2 |             |             |
| locus0840 | uce-1140_p1 | uce-1140_p2 |             |             |
| locus0841 | uce-1139_p1 | uce-1139_p2 |             |             |
| locus0842 | uce-1135_p1 | uce-1135_p2 |             |             |
| locus0843 | uce-1130_p1 | uce-1130_p2 |             |             |
| locus0844 | uce-1129_p1 | uce-1129_p2 |             |             |
| locus0845 | uce-1125_p1 | uce-1125_p2 |             |             |
| locus0846 | uce-1114_p1 | uce-1114_p2 |             |             |
| locus0847 | uce-1113_p1 | uce-1113_p2 |             |             |

|           |             |             |             |             |
|-----------|-------------|-------------|-------------|-------------|
| locus0848 | uce-1112_p1 | uce-1112_p2 |             |             |
| locus0849 | uce-1299_p1 | uce-1299_p2 | uce-1300_p1 | uce-1300_p2 |
| locus0850 |             | uce-1157_p2 | uce-1158_p1 | uce-1158_p2 |
| locus0851 | uce-1109_p1 | uce-1109_p2 |             |             |
| locus0852 | uce-1108_p1 | uce-1108_p2 |             |             |
| locus0853 | uce-1098_p1 | uce-1098_p2 |             |             |
| locus0854 | uce-1097_p1 | uce-1097_p2 |             |             |
| locus0855 | uce-1092_p1 | uce-1092_p2 |             |             |
| locus0856 | uce-1091_p1 | uce-1091_p2 |             |             |
| locus0857 | uce-1086_p1 | uce-1086_p2 |             |             |
| locus0858 | uce-1078_p1 | uce-1078_p2 |             |             |
| locus0859 | uce-1073_p1 | uce-1073_p2 |             |             |
| locus0860 | uce-1072_p1 | uce-1072_p2 |             |             |
| locus0861 |             | uce-592_p2  | uce-593_p1  | uce-593_p2  |
| locus0862 | uce-1062_p1 | uce-1062_p2 |             |             |
| locus0863 | uce-1060_p1 | uce-1060_p2 |             |             |
| locus0864 | uce-1055_p1 | uce-1055_p2 |             |             |
| locus0865 | uce-1047_p1 | uce-1047_p2 |             |             |
| locus0866 | uce-1046_p1 | uce-1046_p2 |             |             |
| locus0867 | uce-1038_p1 | uce-1038_p2 |             |             |
| locus0868 | uce-1014_p1 | uce-1014_p2 |             |             |
| locus0869 | uce-1011_p1 | uce-1011_p2 |             |             |
| locus0870 | uce-1006_p1 | uce-1006_p2 |             |             |
| locus0871 | uce-992_p1  | uce-992_p2  |             |             |
| locus0872 |             | uce-1056_p2 | uce-1057_p1 | uce-1057_p2 |
| locus0873 | uce-983_p1  | uce-983_p2  |             |             |
| locus0874 | uce-982_p1  | uce-982_p2  |             |             |
| locus0875 | uce-981_p1  | uce-981_p2  |             |             |
| locus0876 | uce-969_p1  | uce-969_p2  |             |             |
| locus0877 | uce-968_p1  | uce-968_p2  |             |             |
| locus0878 | uce-965_p1  | uce-965_p2  |             |             |
| locus0879 | uce-964_p1  | uce-964_p2  |             |             |
| locus0880 | uce-961_p1  | uce-961_p2  |             |             |
| locus0881 | uce-959_p1  | uce-959_p2  |             |             |

|           |             |             |             |            |
|-----------|-------------|-------------|-------------|------------|
| locus0882 | uce-954_p1  | uce-954_p2  |             |            |
| locus0883 | uce-1002_p1 | uce-1002_p2 | uce-1003_p1 |            |
| locus0884 | uce-945_p1  | uce-945_p2  |             |            |
| locus0885 | uce-939_p1  | uce-939_p2  |             |            |
| locus0886 | uce-938_p1  | uce-938_p2  |             |            |
| locus0887 | uce-935_p1  | uce-935_p2  |             |            |
| locus0888 | uce-933_p1  | uce-933_p2  |             |            |
| locus0889 | uce-929_p1  | uce-929_p2  |             |            |
| locus0890 | uce-922_p1  | uce-922_p2  |             |            |
| locus0891 | uce-911_p1  | uce-911_p2  |             |            |
| locus0892 | uce-910_p1  | uce-910_p2  |             |            |
| locus0893 | uce-902_p1  | uce-902_p2  |             |            |
| locus0894 | uce-322_p1  | uce-322_p2  | uce-323_p1  |            |
| locus0895 | uce-900_p1  | uce-900_p2  |             |            |
| locus0896 | uce-896_p1  | uce-896_p2  |             |            |
| locus0897 | uce-881_p1  | uce-881_p2  |             |            |
| locus0898 | uce-880_p1  | uce-880_p2  |             |            |
| locus0899 | uce-879_p1  | uce-879_p2  |             |            |
| locus0900 | uce-878_p1  | uce-878_p2  |             |            |
| locus0901 | uce-876_p1  | uce-876_p2  |             |            |
| locus0902 | uce-872_p1  | uce-872_p2  |             |            |
| locus0903 | uce-867_p1  | uce-867_p2  |             |            |
| locus0904 | uce-863_p1  | uce-863_p2  |             |            |
| locus0905 |             | uce-726_p2  | uce-727_p1  | uce-727_p2 |
| locus0906 | uce-862_p1  | uce-862_p2  |             |            |
| locus0907 | uce-860_p1  | uce-860_p2  |             |            |
| locus0908 | uce-847_p1  | uce-847_p2  |             |            |
| locus0909 | uce-845_p1  | uce-845_p2  |             |            |
| locus0910 | uce-843_p1  | uce-843_p2  |             |            |
| locus0911 | uce-842_p1  | uce-842_p2  |             |            |
| locus0912 | uce-839_p1  | uce-839_p2  |             |            |
| locus0913 | uce-838_p1  | uce-838_p2  |             |            |
| locus0914 | uce-834_p1  | uce-834_p2  |             |            |
| locus0915 | uce-827_p1  | uce-827_p2  |             |            |

|           |             |             |            |            |
|-----------|-------------|-------------|------------|------------|
| locus0916 |             | uce-853_p2  | uce-854_p1 | uce-854_p2 |
| locus0917 | uce-821_p1  | uce-821_p2  |            |            |
| locus0918 | uce-818_p1  | uce-818_p2  |            |            |
| locus0919 | uce-809_p1  | uce-809_p2  |            |            |
| locus0920 | uce-799_p1  | uce-799_p2  |            |            |
| locus0921 | uce-797_p1  | uce-797_p2  |            |            |
| locus0922 | uce-793_p1  | uce-793_p2  |            |            |
| locus0923 | uce-792_p1  | uce-792_p2  |            |            |
| locus0924 | uce-791_p1  | uce-791_p2  |            |            |
| locus0925 | uce-790_p1  | uce-790_p2  |            |            |
| locus0926 | uce-783_p1  | uce-783_p2  |            |            |
| locus0927 | uce-451_p1  | uce-451_p2  | uce-452_p1 |            |
| locus0928 | uce-780_p1  | uce-780_p2  |            |            |
| locus0929 | uce-776_p1  | uce-776_p2  |            |            |
| locus0930 | uce-775_p1  | uce-775_p2  |            |            |
| locus0931 | uce-771_p1  | uce-771_p2  |            |            |
| locus0932 | uce-769_p1  | uce-769_p2  |            |            |
| locus0933 | uce-766_p1  | uce-766_p2  |            |            |
| locus0934 | uce-763_p1  | uce-763_p2  |            |            |
| locus0935 | uce-758_p1  | uce-758_p2  |            |            |
| locus0936 | uce-748_p1  | uce-748_p2  |            |            |
| locus0937 | uce-741_p1  | uce-741_p2  |            |            |
| locus0938 | uce-762_p1  | uce-762_p2  |            |            |
| locus0939 | uce-728_p1  | uce-728_p2  |            |            |
| locus0940 | uce-717_p1  | uce-717_p2  |            |            |
| locus0941 | uce-706_p1  | uce-706_p2  |            |            |
| locus0942 | uce-701_p1  | uce-701_p2  |            |            |
| locus0943 | uce-696_p1  | uce-696_p2  |            |            |
| locus0944 | uce-695_p1  | uce-695_p2  |            |            |
| locus0945 | uce-694_p1  | uce-694_p2  |            |            |
| locus0946 | uce-693_p1  | uce-693_p2  |            |            |
| locus0947 | uce-686_p1  | uce-686_p2  |            |            |
| locus0948 | uce-683_p1  | uce-683_p2  |            |            |
| locus0949 | uce-1502_p1 | uce-1502_p2 |            |            |



|           |             |             |             |             |
|-----------|-------------|-------------|-------------|-------------|
| locus0950 | uce-682_p1  | uce-682_p2  |             |             |
| locus0951 | uce-677_p1  | uce-677_p2  |             |             |
| locus0952 | uce-676_p1  | uce-676_p2  |             |             |
| locus0953 | uce-670_p1  | uce-670_p2  |             |             |
| locus0954 | uce-669_p1  | uce-669_p2  |             |             |
| locus0955 | uce-664_p1  | uce-664_p2  |             |             |
| locus0956 | uce-662_p1  | uce-662_p2  |             |             |
| locus0957 | uce-659_p1  | uce-659_p2  |             |             |
| locus0958 | uce-652_p1  | uce-652_p2  |             |             |
| locus0959 | uce-651_p1  | uce-651_p2  |             |             |
| locus0960 | uce-1453_p1 | uce-1453_p2 | uce-1454_p1 | uce-1454_p2 |
| locus0961 | uce-1482_p1 | uce-1482_p2 |             |             |
| locus0962 | uce-647_p1  | uce-647_p2  |             |             |
| locus0963 | uce-637_p1  | uce-637_p2  |             |             |
| locus0964 | uce-636_p1  | uce-636_p2  |             |             |
| locus0965 | uce-618_p1  | uce-618_p2  |             |             |
| locus0966 | uce-617_p1  | uce-617_p2  |             |             |
| locus0967 | uce-613_p1  | uce-613_p2  |             |             |
| locus0968 | uce-605_p1  | uce-605_p2  |             |             |
| locus0969 | uce-604_p1  | uce-604_p2  |             |             |
| locus0970 | uce-600_p1  | uce-600_p2  |             |             |
| locus0971 | uce-598_p1  | uce-598_p2  |             |             |
| locus0972 | uce-1474_p1 | uce-1474_p2 |             |             |
| locus0973 | uce-591_p1  | uce-591_p2  |             |             |
| locus0974 | uce-583_p1  | uce-583_p2  |             |             |
| locus0975 | uce-573_p1  | uce-573_p2  |             |             |
| locus0976 | uce-570_p1  | uce-570_p2  |             |             |
| locus0977 | uce-569_p1  | uce-569_p2  |             |             |
| locus0978 | uce-568_p1  | uce-568_p2  |             |             |
| locus0979 | uce-565_p1  | uce-565_p2  |             |             |
| locus0980 | uce-559_p1  | uce-559_p2  |             |             |
| locus0981 | uce-546_p1  | uce-546_p2  |             |             |
| locus0982 | uce-545_p1  | uce-545_p2  |             |             |
| locus0983 | uce-1473_p1 | uce-1473_p2 |             |             |

|           |             |             |
|-----------|-------------|-------------|
| locus0984 | uce-538_p1  | uce-538_p2  |
| locus0985 | uce-534_p1  | uce-534_p2  |
| locus0986 | uce-532_p1  | uce-532_p2  |
| locus0987 | uce-530_p1  | uce-530_p2  |
| locus0988 | uce-527_p1  | uce-527_p2  |
| locus0989 | uce-525_p1  | uce-525_p2  |
| locus0990 | uce-520_p1  | uce-520_p2  |
| locus0991 | uce-519_p1  | uce-519_p2  |
| locus0992 | uce-516_p1  | uce-516_p2  |
| locus0993 | uce-510_p1  | uce-510_p2  |
| locus0994 | uce-1469_p1 | uce-1469_p2 |
| locus0995 | uce-502_p1  | uce-502_p2  |
| locus0996 | uce-493_p1  | uce-493_p2  |
| locus0997 | uce-489_p1  | uce-489_p2  |
| locus0998 | uce-473_p1  | uce-473_p2  |
| locus0999 | uce-450_p1  | uce-450_p2  |
| locus1000 | uce-448_p1  | uce-448_p2  |
| locus1001 | uce-443_p1  | uce-443_p2  |
| locus1002 | uce-442_p1  | uce-442_p2  |
| locus1003 | uce-438_p1  | uce-438_p2  |
| locus1004 | uce-433_p1  | uce-433_p2  |
| locus1005 | uce-4_p1    | uce-4_p2    |
| locus1006 | uce-423_p1  | uce-423_p2  |
| locus1007 | uce-421_p1  | uce-421_p2  |
| locus1008 | uce-412_p1  | uce-412_p2  |
| locus1009 | uce-411_p1  | uce-411_p2  |
| locus1010 | uce-408_p1  | uce-408_p2  |
| locus1011 | uce-402_p1  | uce-402_p2  |
| locus1012 | uce-399_p1  | uce-399_p2  |
| locus1013 | uce-396_p1  | uce-396_p2  |
| locus1014 | uce-387_p1  | uce-387_p2  |
| locus1015 | uce-368_p1  | uce-368_p2  |
| locus1016 | uce-1447_p1 | uce-1447_p2 |
| locus1017 | uce-365_p1  | uce-365_p2  |

|           |             |             |
|-----------|-------------|-------------|
| locus1018 | uce-361_p1  | uce-361_p2  |
| locus1019 | uce-355_p1  | uce-355_p2  |
| locus1020 | uce-351_p1  | uce-351_p2  |
| locus1021 | uce-341_p1  | uce-341_p2  |
| locus1022 | uce-298_p1  | uce-298_p2  |
| locus1023 | uce-290_p1  | uce-290_p2  |
| locus1024 | uce-285_p1  | uce-285_p2  |
| locus1025 | uce-279_p1  | uce-279_p2  |
| locus1026 | uce-276_p1  | uce-276_p2  |
| locus1027 | uce-1445_p1 | uce-1445_p2 |
| locus1028 | uce-273_p1  | uce-273_p2  |
| locus1029 | uce-270_p1  | uce-270_p2  |
| locus1030 | uce-266_p1  | uce-266_p2  |
| locus1031 | uce-263_p1  | uce-263_p2  |
| locus1032 | uce-255_p1  | uce-255_p2  |
| locus1033 | uce-252_p1  | uce-252_p2  |
| locus1034 | uce-249_p1  | uce-249_p2  |
| locus1035 | uce-245_p1  | uce-245_p2  |
| locus1036 | uce-244_p1  | uce-244_p2  |
| locus1037 | uce-238_p1  | uce-238_p2  |
| locus1038 | uce-1444_p1 | uce-1444_p2 |
| locus1039 | uce-222_p1  | uce-222_p2  |
| locus1040 | uce-221_p1  | uce-221_p2  |
| locus1041 | uce-208_p1  | uce-208_p2  |
| locus1042 | uce-207_p1  | uce-207_p2  |
| locus1043 | uce-204_p1  | uce-204_p2  |
| locus1044 | uce-197_p1  | uce-197_p2  |
| locus1045 | uce-194_p1  | uce-194_p2  |
| locus1046 | uce-192_p1  | uce-192_p2  |
| locus1047 | uce-188_p1  | uce-188_p2  |
| locus1048 | uce-175_p1  | uce-175_p2  |
| locus1049 | uce-1434_p1 | uce-1434_p2 |
| locus1050 | uce-168_p1  | uce-168_p2  |
| locus1051 | uce-163_p1  | uce-163_p2  |

|           |             |             |             |             |
|-----------|-------------|-------------|-------------|-------------|
| locus1052 | uce-161_p1  | uce-161_p2  |             |             |
| locus1053 | uce-156_p1  | uce-156_p2  |             |             |
| locus1054 | uce-154_p1  | uce-154_p2  |             |             |
| locus1055 | uce-153_p1  | uce-153_p2  |             |             |
| locus1056 | uce-152_p1  | uce-152_p2  |             |             |
| locus1057 | uce-142_p1  | uce-142_p2  |             |             |
| locus1058 | uce-141_p1  | uce-141_p2  |             |             |
| locus1059 | uce-128_p1  | uce-128_p2  |             |             |
| locus1060 | uce-1432_p1 | uce-1432_p2 |             |             |
| locus1061 | uce-124_p1  | uce-124_p2  |             |             |
| locus1062 | uce-119_p1  | uce-119_p2  |             |             |
| locus1063 | uce-113_p1  | uce-113_p2  |             |             |
| locus1064 | uce-111_p1  | uce-111_p2  |             |             |
| locus1065 | uce-109_p1  | uce-109_p2  |             |             |
| locus1066 | uce-107_p1  | uce-107_p2  |             |             |
| locus1067 | uce-106_p1  | uce-106_p2  |             |             |
| locus1068 | uce-103_p1  | uce-103_p2  |             |             |
| locus1069 | uce-102_p1  | uce-102_p2  |             |             |
| locus1070 | uce-97_p1   | uce-97_p2   |             |             |
| locus1071 | uce-1493_p1 | uce-1493_p2 | uce-1494_p1 | uce-1494_p2 |
| locus1072 | uce-1424_p1 | uce-1424_p2 |             |             |
| locus1073 | uce-93_p1   | uce-93_p2   |             |             |
| locus1074 | uce-92_p1   | uce-92_p2   |             |             |
| locus1075 | uce-91_p1   | uce-91_p2   |             |             |
| locus1076 | uce-90_p1   | uce-90_p2   |             |             |
| locus1077 | uce-82_p1   | uce-82_p2   |             |             |
| locus1078 | uce-63_p1   | uce-63_p2   |             |             |
| locus1079 | uce-58_p1   | uce-58_p2   |             |             |
| locus1080 | uce-57_p1   | uce-57_p2   |             |             |
| locus1081 | uce-51_p1   | uce-51_p2   |             |             |
| locus1082 | uce-50_p1   | uce-50_p2   |             |             |
| locus1083 | uce-1419_p1 | uce-1419_p2 |             |             |
| locus1084 | uce-40_p1   | uce-40_p2   |             |             |
| locus1085 | uce-37_p1   | uce-37_p2   |             |             |

|           |             |             |
|-----------|-------------|-------------|
| locus1086 | uce-36_p1   | uce-36_p2   |
| locus1087 | uce-32_p1   | uce-32_p2   |
| locus1088 | uce-31_p1   | uce-31_p2   |
| locus1089 | uce-24_p1   | uce-24_p2   |
| locus1090 | uce-14_p1   | uce-14_p2   |
| locus1091 | uce-12_p1   | uce-12_p2   |
| locus1092 | uce-1504_p1 | uce-1504_p2 |
| locus1093 | uce-1499_p1 | uce-1499_p2 |
| locus1094 | uce-1416_p1 | uce-1416_p2 |
| locus1095 | uce-1496_p1 | uce-1496_p2 |
| locus1096 | uce-1486_p1 | uce-1486_p2 |
| locus1097 | uce-1483_p1 | uce-1483_p2 |
| locus1098 | uce-1479_p1 | uce-1479_p2 |
| locus1099 | uce-1451_p1 | uce-1451_p2 |
| locus1100 | uce-1440_p1 | uce-1440_p2 |
| locus1101 | uce-1426_p1 | uce-1426_p2 |
| locus1102 | uce-1425_p1 | uce-1425_p2 |
| locus1103 | uce-1406_p1 | uce-1406_p2 |
| locus1104 | uce-1398_p1 | uce-1398_p2 |
| locus1105 | uce-1405_p1 | uce-1405_p2 |
| locus1106 | uce-1394_p1 | uce-1394_p2 |
| locus1107 | uce-1393_p1 | uce-1393_p2 |
| locus1108 | uce-1377_p1 | uce-1377_p2 |
| locus1109 | uce-1374_p1 | uce-1374_p2 |
| locus1110 | uce-1373_p1 | uce-1373_p2 |
| locus1111 | uce-1365_p1 | uce-1365_p2 |
| locus1112 | uce-1362_p1 | uce-1362_p2 |
| locus1113 | uce-1353_p1 | uce-1353_p2 |
| locus1114 | uce-1340_p1 | uce-1340_p2 |
| locus1115 | uce-1334_p1 | uce-1334_p2 |
| locus1116 | uce-1401_p1 | uce-1401_p2 |
| locus1117 | uce-1331_p1 | uce-1331_p2 |
| locus1118 | uce-1327_p1 | uce-1327_p2 |
| locus1119 | uce-1323_p1 | uce-1323_p2 |

|           |             |             |
|-----------|-------------|-------------|
| locus1120 | uce-1321_p1 | uce-1321_p2 |
| locus1121 | uce-1317_p1 | uce-1317_p2 |
| locus1122 | uce-1316_p1 | uce-1316_p2 |
| locus1123 | uce-1306_p1 | uce-1306_p2 |
| locus1124 | uce-1304_p1 | uce-1304_p2 |
| locus1125 | uce-1303_p1 | uce-1303_p2 |
| locus1126 | uce-1301_p1 | uce-1301_p2 |
| locus1127 | uce-1396_p1 | uce-1396_p2 |
| locus1128 | uce-1297_p1 | uce-1297_p2 |
| locus1129 | uce-1283_p1 | uce-1283_p2 |
| locus1130 | uce-1277_p1 | uce-1277_p2 |
| locus1131 | uce-1272_p1 | uce-1272_p2 |
| locus1132 | uce-1269_p1 | uce-1269_p2 |
| locus1133 | uce-1268_p1 | uce-1268_p2 |
| locus1134 | uce-1267_p1 | uce-1267_p2 |
| locus1135 | uce-1254_p1 | uce-1254_p2 |
| locus1136 | uce-1238_p1 | uce-1238_p2 |
| locus1137 | uce-1230_p1 | uce-1230_p2 |
| locus1138 | uce-1391_p1 | uce-1391_p2 |
| locus1139 | uce-1229_p1 | uce-1229_p2 |
| locus1140 | uce-1227_p1 | uce-1227_p2 |
| locus1141 | uce-1216_p1 | uce-1216_p2 |
| locus1142 | uce-1209_p1 | uce-1209_p2 |
| locus1143 | uce-1206_p1 | uce-1206_p2 |
| locus1144 | uce-1205_p1 | uce-1205_p2 |
| locus1145 | uce-1197_p1 | uce-1197_p2 |
| locus1146 | uce-1192_p1 | uce-1192_p2 |
| locus1147 | uce-1190_p1 | uce-1190_p2 |
| locus1148 | uce-1189_p1 | uce-1189_p2 |
| locus1149 | uce-1369_p1 | uce-1369_p2 |
| locus1150 | uce-1183_p1 | uce-1183_p2 |
| locus1151 | uce-1180_p1 | uce-1180_p2 |
| locus1152 | uce-1176_p1 | uce-1176_p2 |
| locus1153 | uce-1171_p1 | uce-1171_p2 |

|           |             |             |
|-----------|-------------|-------------|
| locus1154 | uce-1167_p1 | uce-1167_p2 |
| locus1155 | uce-1166_p1 | uce-1166_p2 |
| locus1156 | uce-1159_p1 | uce-1159_p2 |
| locus1157 | uce-1126_p1 | uce-1126_p2 |
| locus1158 | uce-1117_p1 | uce-1117_p2 |
| locus1159 | uce-1107_p1 | uce-1107_p2 |
| locus1160 | uce-1368_p1 | uce-1368_p2 |
| locus1161 | uce-1105_p1 | uce-1105_p2 |
| locus1162 | uce-1102_p1 | uce-1102_p2 |
| locus1163 | uce-1096_p1 | uce-1096_p2 |
| locus1164 | uce-1085_p1 | uce-1085_p2 |
| locus1165 | uce-1084_p1 | uce-1084_p2 |
| locus1166 | uce-1082_p1 | uce-1082_p2 |
| locus1167 | uce-1079_p1 | uce-1079_p2 |
| locus1168 | uce-1075_p1 | uce-1075_p2 |
| locus1169 | uce-1071_p1 | uce-1071_p2 |
| locus1170 | uce-1069_p1 | uce-1069_p2 |
| locus1171 | uce-1367_p1 | uce-1367_p2 |
| locus1172 | uce-1067_p1 | uce-1067_p2 |
| locus1173 | uce-1064_p1 | uce-1064_p2 |
| locus1174 | uce-1059_p1 | uce-1059_p2 |
| locus1175 | uce-1045_p1 | uce-1045_p2 |
| locus1176 | uce-1035_p1 | uce-1035_p2 |
| locus1177 | uce-1033_p1 | uce-1033_p2 |
| locus1178 | uce-1032_p1 | uce-1032_p2 |
| locus1179 | uce-1028_p1 | uce-1028_p2 |
| locus1180 | uce-1027_p1 | uce-1027_p2 |
| locus1181 | uce-1023_p1 | uce-1023_p2 |
| locus1287 | uce-1_p1    |             |
| locus1182 | uce-1009_p1 |             |
| locus1183 | uce-101_p2  |             |
| locus1184 | uce-1021_p1 |             |
| locus1186 | uce-105_p2  |             |
| locus1185 | uce-1054_p2 |             |

|           |             |
|-----------|-------------|
| locus1187 | uce-1068_p2 |
| locus1188 | uce-1070_p2 |
| locus1189 | uce-1081_p1 |
| locus1190 | uce-1087_p1 |
| locus1191 | uce-1089_p2 |
| locus1192 | uce-1090_p1 |
| locus1193 | uce-1103_p1 |
| locus1194 | uce-1118_p2 |
| locus1197 | uce-112_p1  |
| locus1195 | uce-1122_p2 |
| locus1196 | uce-1123_p1 |
| locus1198 | uce-1132_p2 |
| locus1199 | uce-1137_p2 |
| locus1200 | uce-1138_p2 |
| locus1201 | uce-1141_p1 |
| locus1202 | uce-1143_p2 |
| locus1203 | uce-1145_p1 |
| locus1204 | uce-1150_p1 |
| locus1205 | uce-1152_p1 |
| locus1206 | uce-1168_p2 |
| locus1207 | uce-1170_p2 |
| locus1208 | uce-1172_p1 |
| locus1209 | uce-1179_p2 |
| locus1210 | uce-1185_p2 |
| locus1211 | uce-1195_p2 |
| locus1212 | uce-1198_p2 |
| locus1213 | uce-1202_p2 |
| locus1214 | uce-1204_p1 |
| locus1215 | uce-1210_p2 |
| locus1216 | uce-1221_p2 |
| locus1217 | uce-1224_p1 |
| locus1218 | uce-1226_p2 |
| locus1219 | uce-123_p1  |
| locus1220 | uce-1246_p2 |



|           |             |
|-----------|-------------|
| locus1221 | uce-1263_p1 |
| locus1222 | uce-1276_p2 |
| locus1223 | uce-1285_p2 |
| locus1224 | uce-1288_p1 |
| locus1225 | uce-1289_p2 |
| locus1226 | uce-1290_p2 |
| locus1227 | uce-1291_p1 |
| locus1228 | uce-1292_p1 |
| locus1229 | uce-1294_p1 |
| locus1230 | uce-1295_p1 |
| locus1231 | uce-1302_p1 |
| locus1232 | uce-1309_p1 |
| locus1233 | uce-1312_p1 |
| locus1234 | uce-1320_p1 |
| locus1239 | uce-133_p2  |
| locus1235 | uce-1332_p2 |
| locus1236 | uce-1336_p2 |
| locus1237 | uce-1338_p1 |
| locus1238 | uce-1339_p1 |
| locus1242 | uce-134_p2  |
| locus1240 | uce-1341_p1 |
| locus1241 | uce-1347_p2 |
| locus1245 | uce-135_p1  |
| locus1243 | uce-1354_p1 |
| locus1244 | uce-1357_p2 |
| locus1246 | uce-137_p1  |
| locus1251 | uce-138_p2  |
| locus1247 | uce-1384_p2 |
| locus1248 | uce-1385_p1 |
| locus1249 | uce-1386_p2 |
| locus1250 | uce-1388_p2 |
| locus1252 | uce-1395_p1 |
| locus1256 | uce-140_p2  |
| locus1253 | uce-1400_p1 |

|           |             |
|-----------|-------------|
| locus1254 | uce-1402_p1 |
| locus1255 | uce-1404_p2 |
| locus1257 | uce-1411_p2 |
| locus1258 | uce-1430_p2 |
| locus1259 | uce-1437_p1 |
| locus1260 | uce-1441_p2 |
| locus1261 | uce-1458_p1 |
| locus1262 | uce-1459_p2 |
| locus1264 | uce-147_p2  |
| locus1263 | uce-1477_p1 |
| locus1265 | uce-1480_p2 |
| locus1269 | uce-149_p1  |
| locus1266 | uce-1490_p1 |
| locus1267 | uce-1491_p2 |
| locus1268 | uce-1498_p1 |
| locus1270 | uce-1501_p1 |
| locus1271 | uce-1503_p2 |
| locus1272 | uce-1507_p2 |
| locus1273 | uce-1509_p2 |
| locus1274 | uce-151_p1  |
| locus1275 | uce-158_p2  |
| locus1276 | uce-166_p1  |
| locus1277 | uce-176_p2  |
| locus1278 | uce-177_p2  |
| locus1279 | uce-183_p1  |
| locus1280 | uce-184_p2  |
| locus1281 | uce-187_p2  |
| locus1286 | uce-19_p2   |
| locus1282 | uce-190_p2  |
| locus1283 | uce-193_p1  |
| locus1284 | uce-196_p2  |
| locus1285 | uce-198_p1  |
| locus1288 | uce-211_p1  |
| locus1289 | uce-214_p2  |

|           |            |
|-----------|------------|
| locus1290 | uce-215_p1 |
| locus1291 | uce-216_p2 |
| locus1292 | uce-218_p1 |
| locus1293 | uce-220_p2 |
| locus1294 | uce-223_p1 |
| locus1295 | uce-227_p2 |
| locus1296 | uce-231_p2 |
| locus1297 | uce-246_p2 |
| locus1298 | uce-262_p1 |
| locus1299 | uce-264_p1 |
| locus1300 | uce-268_p1 |
| locus1301 | uce-272_p2 |
| locus1302 | uce-277_p2 |
| locus1303 | uce-280_p1 |
| locus1304 | uce-289_p2 |
| locus1305 | uce-292    |
| locus1306 | uce-294_p1 |
| locus1309 | uce-30_p1  |
| locus1307 | uce-300_p2 |
| locus1308 | uce-306_p1 |
| locus1310 | uce-314_p2 |
| locus1311 | uce-318_p1 |
| locus1312 | uce-324_p1 |
| locus1313 | uce-331_p2 |
| locus1314 | uce-336_p2 |
| locus1315 | uce-346_p1 |
| locus1316 | uce-352_p1 |
| locus1317 | uce-353_p2 |
| locus1318 | uce-354_p1 |
| locus1319 | uce-356_p2 |
| locus1320 | uce-357_p1 |
| locus1321 | uce-358_p1 |
| locus1322 | uce-371_p1 |
| locus1323 | uce-372_p2 |

|           |            |
|-----------|------------|
| locus1324 | uce-378_p1 |
| locus1325 | uce-381_p1 |
| locus1326 | uce-382_p2 |
| locus1327 | uce-384_p2 |
| locus1328 | uce-385_p2 |
| locus1329 | uce-398_p1 |
| locus1330 | uce-405_p1 |
| locus1331 | uce-410_p1 |
| locus1332 | uce-414_p1 |
| locus1333 | uce-425_p1 |
| locus1334 | uce-426_p2 |
| locus1335 | uce-434_p2 |
| locus1336 | uce-435_p1 |
| locus1337 | uce-447_p2 |
| locus1338 | uce-454_p2 |
| locus1339 | uce-462_p2 |
| locus1340 | uce-463_p2 |
| locus1341 | uce-464_p1 |
| locus1342 | uce-469_p1 |
| locus1343 | uce-474_p1 |
| locus1344 | uce-477_p2 |
| locus1345 | uce-482_p1 |
| locus1346 | uce-484_p1 |
| locus1347 | uce-485_p2 |
| locus1348 | uce-487_p2 |
| locus1349 | uce-490_p1 |
| locus1350 | uce-494_p2 |
| locus1351 | uce-549_p2 |
| locus1352 | uce-555_p2 |
| locus1353 | uce-558_p1 |
| locus1356 | uce-56_p2  |
| locus1354 | uce-562_p2 |
| locus1355 | uce-563_p1 |
| locus1357 | uce-572_p1 |

|           |            |
|-----------|------------|
| locus1358 | uce-575_p1 |
| locus1359 | uce-587_p2 |
| locus1360 | uce-599_p1 |
| locus1361 | uce-602_p1 |
| locus1362 | uce-603_p1 |
| locus1363 | uce-612_p2 |
| locus1364 | uce-619_p2 |
| locus1365 | uce-626_p1 |
| locus1366 | uce-628_p1 |
| locus1367 | uce-639_p2 |
| locus1368 | uce-648_p1 |
| locus1369 | uce-653_p2 |
| locus1371 | uce-66_p1  |
| locus1370 | uce-660_p2 |
| locus1372 | uce-671_p1 |
| locus1373 | uce-674_p2 |
| locus1374 | uce-680_p1 |
| locus1375 | uce-681_p1 |
| locus1376 | uce-685_p1 |
| locus1377 | uce-697_p1 |
| locus1378 | uce-698_p2 |
| locus1394 | uce-7_p1   |
| locus1379 | uce-700_p1 |
| locus1380 | uce-705    |
| locus1381 | uce-712_p1 |
| locus1382 | uce-732_p2 |
| locus1383 | uce-733_p1 |
| locus1384 | uce-740_p1 |
| locus1385 | uce-742_p1 |
| locus1386 | uce-760_p1 |
| locus1387 | uce-768_p2 |
| locus1388 | uce-782_p2 |
| locus1389 | uce-788_p1 |
| locus1390 | uce-794_p1 |

|           |            |
|-----------|------------|
| locus1391 | uce-795_p2 |
| locus1392 | uce-796_p1 |
| locus1393 | uce-798_p1 |
| locus1395 | uce-802_p1 |
| locus1396 | uce-806_p2 |
| locus1397 | uce-807_p2 |
| locus1398 | uce-808_p2 |
| locus1399 | uce-810_p2 |
| locus1400 | uce-817_p2 |
| locus1401 | uce-829_p2 |
| locus1404 | uce-85_p1  |
| locus1402 | uce-855_p1 |
| locus1403 | uce-857_p1 |
| locus1405 | uce-865_p2 |
| locus1406 | uce-868_p2 |
| locus1407 | uce-869_p1 |
| locus1408 | uce-871_p1 |
| locus1409 | uce-874_p1 |
| locus1410 | uce-883_p1 |
| locus1411 | uce-884_p2 |
| locus1412 | uce-885_p1 |
| locus1413 | uce-887_p2 |
| locus1414 | uce-889_p1 |
| locus1415 | uce-89_p1  |
| locus1416 | uce-903_p2 |
| locus1417 | uce-904_p2 |
| locus1418 | uce-908_p1 |
| locus1419 | uce-917_p1 |
| locus1420 | uce-919_p1 |
| locus1421 | uce-921_p2 |
| locus1422 | uce-924_p1 |
| locus1423 | uce-926_p1 |
| locus1424 | uce-94_p1  |
| locus1425 | uce-951_p1 |

|           |            |
|-----------|------------|
| locus1426 | uce-967_p2 |
| locus1427 | uce-974_p1 |
| locus1428 | uce-977_p1 |
| locus1429 | uce-979_p2 |
| locus1430 | uce-980_p2 |
| locus1431 | uce-986_p2 |
| locus1432 | uce-999_p2 |

**Table S1**

| sample code    | source     | collection year | Family        | genus         | species      | preservative method | identified by | WGA | q of input DNA (ng) for library preparation | nb raw reads | nb contigs | average contig depth | average length of UCEs | nb UCEs after filtering | nb UCEs in the 25% complete matrix |
|----------------|------------|-----------------|---------------|---------------|--------------|---------------------|---------------|-----|---------------------------------------------|--------------|------------|----------------------|------------------------|-------------------------|------------------------------------|
| JRAS07732_0101 | this study | 2017            | Azotidae      | Ablerus       | sp 1         | 96% EtOH            | Polaszek A.   | no  | 5                                           | 4536         | 800        | 4.3                  | 447.5                  | 522                     | 509                                |
| JRAS07826_0189 | this study | 2009            | Azotidae      | Ablerus       | sp 2         | 96% EtOH            | Delvare G.    | no  | 25                                          | 29290        | 3157       | 6.0                  | 532.5                  | 739                     | 713                                |
| LFMM00018_0689 | this study | 2015            | Azotidae      | Ablerus       | sp 3         | 96% EtOH            | Rasplus J.Y.  | no  | 12.5                                        | 11157        | 982        | 2.7                  | 265.5                  | 139                     | 131                                |
| JRAS06864_0689 | this study | 2016            | Mymaridae     | Acmopolynema  | sema         | 96% EtOH            | Rasplus J.Y.  | no  | 25                                          | 61132        | 2536       | 21.6                 | 725.6                  | 682                     | 656                                |
| JRAS07790_0401 | this study | 2012            | Eulophidae    | Acrias        | sp.          | 96% EtOH            | Rasplus J.Y.  | no  | 7.75                                        | 33085        | 1497       | 20.7                 | 550.0                  | 990                     | 933                                |
| JRAS07597_0189 | this study | 2017            | Encyrtidae    | Aglyptus      | rufus        | 96% EtOH            | Rasplus J.Y.  | no  | 100                                         | 391096       | 10490      | 24.0                 | 816.5                  | 1064                    | 958                                |
| JRAS07777_0189 | this study | 2015            | Mymaridae     | Alaptus       | sp.          | 96% EtOH            | Huber J.      | no  | 22.85                                       | 23725        | 1168       | 17.2                 | 697.3                  | 262                     | 253                                |
| JRAS07824_0189 | this study | 2011            | Eulophidae    | Aleuroctonus  | vittatus     | 96% EtOH            | Delvare G.    | no  | 25                                          | 28486        | 2174       | 9.6                  | 553.7                  | 775                     | 746                                |
| JRAS07787_0189 | this study | 2010            | Mymaridae     | Anagroidea    | sp.          | 96% EtOH            | Huber J.      | no  | 25                                          | 51511        | 1931       | 25.3                 | 665.8                  | 619                     | 597                                |
| JRAS07625_0389 | this study | 2015            | Mymaridae     | Anagrus       | sp.          | alcohol             | Rasplus J.Y.  | no  | 50                                          | 20265        | 1288       | 13.4                 | 509.9                  | 393                     | 380                                |
| GDEL06009_0101 | this study | -               | Encyrtidae    | Anagyrus      | sp.          | 96% EtOH            | Delvare G.    | no  | 25                                          | 108502       | 2198       | 30.2                 | 645.9                  | 1042                    | 977                                |
| JRAS07782_0189 | this study | 2015            | Mymaridae     | Anaphes       | nitens       | 96% EtOH            | Huber J.      | no  | 25                                          | 110238       | 2097       | 49.8                 | 784.3                  | 623                     | 589                                |
| JSTR01594_0189 | this study | 2015            | Aphelinidae   | Aphelinus     | abdominalis  | 96% EtOH            | Rasplus J.Y.  | no  | 25                                          | 57538        | 2867       | 17.9                 | 667.8                  | 940                     | 896                                |
| JRAS07609_0289 | this study | 2017            | Aphelinidae   | Aphelinus     | mali         | 96% EtOH            | Rasplus J.Y.  | no  | 100                                         | 60941        | 2647       | 13.7                 | 602.5                  | 370                     | 341                                |
| JSTR01583_0189 | this study | 2015            | Aphelinidae   | Aphytis       | melinus      | 96% EtOH            | Rasplus J.Y.  | no  | 25                                          | 94733        | 3052       | 29.1                 | 671.6                  | 932                     | 879                                |
| JRAS07736_0101 | this study | 2017            | Aphelinidae   | Aphytis       | sp.          | 96% EtOH            | Polaszek A.   | no  | 5                                           | 30646        | 2557       | 10.7                 | 586.5                  | 840                     | 806                                |
| JRAS07817_0189 | this study | 2005            | Eulophidae    | Aprostocetus  | sp.          | 96% EtOH            | Delvare G.    | no  | 25                                          | 26019        | 2785       | 6.7                  | 540.0                  | 738                     | 717                                |
| JRAS07776_0189 | this study | 2014            | Mymaridae     | Arescon       | dimidiatus   | 96% EtOH            | Huber J.      | no  | 25                                          | 18469        | 2268       | 6.5                  | 555.2                  | 428                     | 415                                |
| JRAS07827_0189 | this study | 2007            | Encyrtidae    | Arhenophagus  | chionaspidis | 96% EtOH            | Delvare G.    | no  | 25                                          | 49555        | 1625       | 28.9                 | 554.6                  | 620                     | 589                                |
| JRAS07815_0189 | this study | 2015            | Eulophidae    | Astichus      | solutus      | 96% EtOH            | Rasplus J.Y.  | no  | 25                                          | 90220        | 2374       | 35.9                 | 645.9                  | 981                     | 918                                |
| JRAS07786_0189 | this study | 2010            | Mymaridae     | Australomymar | sp.          | 96% EtOH            | Huber J.      | no  | 25                                          | 23748        | 2011       | 10.5                 | 533.2                  | 836                     | 803                                |
| JRAS07766_0101 | this study | 2015            | Eulophidae    | Baeoentodon   | balios       | 96% EtOH            | Polaszek A.   | no  | 5                                           | 852          | 165        | 2.6                  | 336.0                  | 122                     | 119                                |
| JRAS07837_0189 | this study | 2001            | Eulophidae    | Baryscapus    | servadeii    | 96% EtOH            | Auger M.A.    | no  | 25                                          | 76712        | 3364       | 20.8                 | 703.4                  | 903                     | 860                                |
| JRAS07739_0101 | this study | 2017            | Aphelinidae   | Cales         | sp.          | 96% EtOH            | Polaszek A.   | no  | 10                                          | 11919        | 1575       | 3.6                  | 481.9                  | 410                     | 399                                |
| LFMM00028_0189 | this study | 2015            | Encyrtidae    | Ceballosia    | sp.          | 96% EtOH            | Fusu L.       | no  | 25                                          | 78255        | 2425       | 30.1                 | 685.3                  | 930                     | 880                                |
| JRAS07600_0389 | this study | 2015            | Aphelinidae   | Centrodera    | amoena       | 96% EtOH            | Rasplus J.Y.  | no  | 100                                         | 442931       | 16406      | 18.1                 | 837.0                  | 395                     | 355                                |
| JRAS07600_0201 | this study | 2015            | Signiphoridae | Chartocerus   | sp.          | 96% EtOH            | Rasplus J.Y.  | no  | 9.9                                         | 33997        | 1582       | 20.4                 | 625.4                  | 955                     | 904                                |
| LFMM00028_0289 | this study | 2015            | Encyrtidae    | Cheiloneurus  | longiventris | 96% EtOH            | Fusu L.       | no  | 25                                          | 81297        | 8009       | 5.5                  | 528.8                  | 827                     | 784                                |
| JRAS07593_0101 | this study | 2017            | Eulophidae    | Cirospilus    | diallus      | 96% EtOH            | Rasplus J.Y.  | no  | 18.35                                       | 51149        | 2387       | 19.7                 | 449.2                  | 846                     | 793                                |
| JRAS07820_0189 | this study | -               | Signiphoridae | Clytina       | giraudi      | 96% EtOH            | Delvare G.    | no  | 7.5                                         | 85324        | 4148       | 16.7                 | 726.4                  | 1004                    | 937                                |



| sample code    | source                  | collection year | Family       | genus                | species     | preservative method | identified by WGA | q of input DNA (ng) for library preparation | nb raw reads | nb contigs | average contig depth | average length of UCEs | nb UCEs after filtering | nb UCEs in the 25% complete matrix |     |
|----------------|-------------------------|-----------------|--------------|----------------------|-------------|---------------------|-------------------|---------------------------------------------|--------------|------------|----------------------|------------------------|-------------------------|------------------------------------|-----|
| JRAS07742_0101 | this study              | 2017            | Aphelinidae  | Coccobius            | sp.         | 96% EtOH            | Polaszek A.       | no                                          | 10           | 111940     | 2913                 | 37.2                   | 687.7                   | 976                                | 905 |
| JSTR00692_0189 | this study              | 2014            | Aphelinidae  | Coccophagus          | scutellaris | 96% EtOH            | Rasplus J.Y.      | no                                          | 25           | 51925      | 2740                 | 16.8                   | 627.1                   | 756                                | 729 |
| JRAS07595_0189 | this study              | 2017            | Encyrtidae   | Copidosoma           | aretas      | 96% EtOH            | Rasplus J.Y.      | no                                          | 100          | 134565     | 6815                 | 11.3                   | 718.1                   | 895                                | 836 |
| GENO00013_0101 | Branstetter et al. 2017 | -               | Encyrtidae   | Copidosoma           | floridanum  |                     |                   | no                                          | NA           | NA         | NA                   | NA                     | NA                      | NA                                 | 833 |
| JRAS07868_0189 | this study              | 2002            | Mymaridae    | Cosmocomoidea        | fasciata    | 96% EtOH            | Triapitsyn S.     | no                                          | 25           | 106354     | 2757                 | 36.2                   | 767.7                   | 404                                | 386 |
| JRAS07832_0189 | this study              | 2012            | Eulophidae   | Diglyphus            | isaea       | 96% EtOH            | Rasplus J.Y.      | no                                          | 25           | 71682      | 2947                 | 22.6                   | 718.4                   | 508                                | 472 |
| JRAS07727_0101 | this study              | 2017            | Aphelinidae  | Dirphys              | sp.         | 96% EtOH            | Polaszek A.       | no                                          | 5            | 41322      | 2206                 | 16.8                   | 610.3                   | 630                                | 610 |
| JRAS06480_2689 | this study              | 2015            | Eulophidae   | Elasmus              | sp.         | 96% EtOH            | Rasplus J.Y.      | no                                          | 100          | 115944     | 2600                 | 29.2                   | 777.8                   | 881                                | 828 |
| JSTR01585_0189 | this study              | 2015            | Aphelinidae  | Encarsia             | citrina     | 96% EtOH            | Rasplus J.Y.      | no                                          | 25           | 82030      | 6402                 | 11.0                   | 612.4                   | 501                                | 479 |
| JSTR00475_0189 | this study              | 2013            | Aphelinidae  | Encarsia             | fomosa      | 96% EtOH            | Rasplus J.Y.      | no                                          | 25           | 51437      | 1753                 | 27.5                   | 654.0                   | 745                                | 724 |
| JRAS07747_0101 | this study              | 2017            | Aphelinidae  | Encarsia/Coccophagus | sp.         | 96% EtOH            | Polaszek A.       | no                                          | 7            | 74566      | 4502                 | 14.6                   | 639.7                   | 813                                | 778 |
| JRAS07830_0189 | this study              | 2010            | Eulophidae   | Entedon              | sparetus    | 96% EtOH            | Delvare G.        | no                                          | 25           | 48985      | 3293                 | 12.9                   | 615.8                   | 659                                | 631 |
| JSTR00476_0189 | this study              | 2013            | Aphelinidae  | Eretmocerus          | eremicus    | 96% EtOH            | Rasplus J.Y.      | no                                          | 25           | 60775      | 3504                 | 15.5                   | 687.3                   | 687                                | 665 |
| LFMM00028_0301 | this study              | 2015            | Encyrtidae   | Ericydnus            | sp.         | 96% EtOH            | Fusu L.           | no                                          | 5            | 58772      | 5503                 | 5.5                    | 551.9                   | 906                                | 872 |
| JRAS07780_0189 | this study              | 1983            | Mymaridae    | Erythmelus           | sp.         | 96% EtOH            | Huber J.          | no                                          | 25           | 19917      | 1843                 | 9.0                    | 560.4                   | 358                                | 345 |
| JRAS07856_0101 | this study              | -               | Mymaridae    | Eubroncus            | sp.         | 96% EtOH            | Gumovsky A.       | no                                          | 10.3         | 24380      | 1330                 | 16.2                   | 641.3                   | 615                                | 596 |
| JRAS07829_0189 | this study              | 2007            | Eulophidae   | Euderus              | sp.         | 96% EtOH            | Delvare G.        | no                                          | 25           | 59521      | 1782                 | 31.5                   | 669.9                   | 915                                | 885 |
| JRAS07575_0389 | this study              | 2017            | Eulophidae   | Euderus ?            | sp.         | 96% EtOH            | Rasplus J.Y.      | no                                          | 100          | 51724      | 1697                 | 19.5                   | 641.5                   | 851                                | 816 |
| JRAS07602_1001 | this study              | 2015            | Pteromalidae | Eunotus              | acutatus    | 96% EtOH            | Rasplus J.Y.      | no                                          | 7.5          | 27785      | 1989                 | 11.9                   | 528.4                   | 1046                               | 963 |
| BRAN00055_0101 | Branstetter et al. 2017 | 2013            | Eulophidae   | Euplectrus           | sp 1        |                     |                   | no                                          | NA           | NA         | NA                   | NA                     | NA                      | NA                                 | 811 |
| JRAS06864_1089 | this study              | 2016            | Eulophidae   | Euplectrus           | sp 2        | 96% EtOH            | Rasplus J.Y.      | no                                          | 25           | 143918     | 3104                 | 44.4                   | 749.2                   | 847                                | 799 |
| ANIC00100_0199 | this study              | 1992            | Aphelinidae  | Eutrichosomella      | sp.         | dried               | Rasplus J.Y.      | no                                          | 25           | 42124      | 1671                 | 23.6                   | 409.2                   | 975                                | 917 |
| JRAS07740_0101 | this study              | 2017            | Aphelinidae  | Euxanthellus         | sp.         | 96% EtOH            | Polaszek A.       | no                                          | 10           | 71869      | 2781                 | 23.9                   | 632.2                   | 931                                | 884 |
| JRAS07784_0189 | this study              | 2014            | Mymaridae    | Gonatocerus          | sp.         | 96% EtOH            | Huber J.          | no                                          | 25           | 17096      | 2101                 | 6.5                    | 544.9                   | 330                                | 324 |
| JRAS07894_0101 | this study              | -               | Encyrtidae   | Hexacladia           | sp.         | 96% EtOH            | Rasplus J.Y.      | no                                          | 25           | 15294      | 1388                 | 8.0                    | 336.5                   | 621                                | 586 |
| JRAS07785_0189 | this study              | 2014            | Mymaridae    | Ischiodasys          | sp.         | 96% EtOH            | Huber J.          | no                                          | 25           | 61925      | 2242                 | 25.9                   | 576.9                   | 312                                | 285 |
| JSTR01580_0189 | this study              | 2015            | Encyrtidae   | Leptomastix          | dactylopii  | 96% EtOH            | Rasplus J.Y.      | no                                          | 25           | 52771      | 4013                 | 11.5                   | 581.7                   | 989                                | 930 |
| JRAS07625_0289 | this study              | 2015            | Mymaridae    | Litus                | cynipseus   | 96% EtOH            | Rasplus J.Y.      | no                                          | 87.84        | 16966      | 1102                 | 9.0                    | 581.7                   | 407                                | 396 |
| JRAS07825_0189 | this study              | 2015            | Aphelinidae  | Marietta             | sp.         | 96% EtOH            | Delvare G.        | no                                          | 25           | 224864     | 5027                 | 43.2                   | 775.4                   | 1021                               | 947 |

| sample code    | source     | collection year | Family            | genus            | species      | preservative method | identified by | WGA | q of input DNA (ng) for library preparation | nb raw reads | nb contigs | average contig depth | average length of UCEs | nb UCEs after filtering | nb UCEs in the 25% complete matrix |
|----------------|------------|-----------------|-------------------|------------------|--------------|---------------------|---------------|-----|---------------------------------------------|--------------|------------|----------------------|------------------------|-------------------------|------------------------------------|
| JRAS07895_0101 | this study | -               | Aphelinidae       | Maudia           | sp.          | DNA                 | Polaszek A.   | no  | 1.8                                         | 28055        | 1834       | 13.2                 | 585.8                  | 685                     | 666                                |
| LFMM00027_0301 | this study | 2015            | Encyrtidae        | Mayridia         | fomusula     | 96% EtOH            | Fusu L.       | no  | 15                                          | 161521       | 3895       | 39.5                 | 782.8                  | 924                     | 855                                |
| JRAS07818_0189 | this study | 2006            | Eulophidae        | Melittobia       | acasta       | 96% EtOH            | Delvare G.    | no  | 25                                          | 134156       | 7216       | 15.3                 | 708.9                  | 742                     | 690                                |
| JRAS07823_0189 | this study | 2008            | Pteromalidae      | Mesopeltita      | sp.          | 96% EtOH            | Rasplus J.Y.  | no  | 25                                          | 195850       | 7280       | 22.8                 | 778.1                  | 1165                    | 1033                               |
| JRAS07597_0489 | this study | 2017            | Encyrtidae        | Metaphycus       | insidiosus   | 96% EtOH            | Rasplus J.Y.  | no  | 100                                         | 151469       | 4634       | 20.4                 | 797.0                  | 812                     | 742                                |
| JRAS07597_0501 | this study | 2017            | Trichogrammatidae | Mirufens         | longicauda   | 96% EtOH            | Rasplus J.Y.  | no  | 24.65                                       | 51012        | 2247       | 20.9                 | 624.7                  | 699                     | 681                                |
| ANIC00046_0189 | this study | 1983            | Pteromalidae      | Moranila         | viridivertex | dried               | Rasplus J.Y.  | no  | 39                                          | 2654         | 521        | 3.0                  | 211.9                  | 359                     | 341                                |
| JRAS07603_0889 | this study | 2015            | Mymaridae         | Mymar            | regale       | alcohol             | Rasplus J.Y.  | no  | 25                                          | 73337        | 5242       | 12.2                 | 658.9                  | 486                     | 469                                |
| JRAS07601_0189 | this study | 2015            | Mymarommatidae    | Mymaromma        | anomalum     | -                   | Rasplus J.Y.  | no  | 29.88                                       | 216429       | 3064       | 48.4                 | 888.6                  | 506                     | 472                                |
| JRAS07882_0189 | this study | 2014            | Mymarommatidae    | Mymaromma        | sp 1         | 96% EtOH            | Fusu L.       | no  | 5                                           | 2175         | 292        | 6.3                  | 303.1                  | 242                     | 230                                |
| JRAS07883_0189 | this study | 2014            | Mymarommatidae    | Mymaromma        | sp 2         | 96% EtOH            | Fusu L.       | no  | 8.1                                         | 15163        | 590        | 24.5                 | 513.0                  | 427                     | 415                                |
| JRAS07828_0189 | this study | 2006            | Eulophidae        | Neopomphale      | aleurothrixi | 96% EtOH            | Delvare G.    | no  | 25                                          | 54638        | 3024       | 16.0                 | 601.0                  | 762                     | 729                                |
| LFMM00003_0189 | this study | 2015            | Aphelinidae       | New Genus        | sp.          | 96% EtOH            | Mitroiu M.D.  | no  | 25                                          | 21302        | 1737       | 10.6                 | 570.8                  | 798                     | 775                                |
| JRAS07781_0189 | this study | 2015            | Mymaridae         | Ooctonus         | hemipterus   | 96% EtOH            | Huber J.      | no  | 25                                          | 58731        | 2189       | 24.6                 | 662.6                  | 560                     | 539                                |
| JSTR00645_0189 | this study | 2013            | Encyrtidae        | Ooencyrtus       | kuvanae      | 96% EtOH            | Delvare G.    | no  | 25                                          | 37148        | 2186       | 15.7                 | 527.7                  | 936                     | 893                                |
| JRAS07816_0189 | this study | 2005            | Eulophidae        | Ophelimus        | maskelli     | 96% EtOH            | Delvare G.    | no  | 25                                          | 36855        | 4103       | 6.0                  | 511.6                  | 916                     | 871                                |
| JRAS07871_0101 | this study | 2012            | Trichogrammatidae | Paracentrobia    | sp.          | 96% EtOH            | Gumovsky A.   | no  | 10.8                                        | 18770        | 1126       | 14.6                 | 502.7                  | 640                     | 616                                |
| JRAS07313_0289 | this study | 2017            | Encyrtidae        | Paratetracnemoid | sp.          | 96% EtOH            | Rasplus J.Y.  | no  | 25                                          | 91306        | 7326       | 9.5                  | 335.1                  | 254                     | 216                                |
| JRAS07600_0489 | this study | 2015            | Eulophidae        | Pediobius        | eubius       | 70% EtOH            | Rasplus J.Y.  | no  | 100                                         | 95338        | 5132       | 11.5                 | 654.2                  | 463                     | 432                                |
| JRAS07594_0101 | this study | 2017            | Eulophidae        | Pnigalio         | sp.          | 96% EtOH            | Rasplus J.Y.  | no  | 25                                          | 75129        | 2304       | 30.9                 | 564.9                  | 905                     | 839                                |
| JRAS07859_0101 | this study | 2015            | Trichogrammatidae | Poropoea         | sp.          | 96% EtOH            | Gumovsky A.   | no  | 25                                          | 39892        | 2835       | 11.8                 | 526.8                  | 580                     | 558                                |
| JRAS07738_0101 | this study | 2017            | Aphelinidae       | Prococcophagus   | sp 1         | 96% EtOH            | Polaszek A.   | no  | 10                                          | 12301        | 1842       | 5.2                  | 440.8                  | 671                     | 650                                |
| JRAS07744_0101 | this study | 2017            | Aphelinidae       | Prococcophagus   | sp 2         | 96% EtOH            | Polaszek A.   | no  | 15                                          | 34952        | 1995       | 15.5                 | 647.8                  | 841                     | 812                                |
| JRAS07625_0489 | this study | 2015            | Trichogrammatidae | Pseudoligosita   | gracillior   | alcohol             | Rasplus J.Y.  | no  | 100                                         | 87834        | 4029       | 12.5                 | 757.1                  | 415                     | 397                                |
| JRAS07730_0101 | this study | 2017            | Aphelinidae       | Pteroptrix       | sp.          | 96% EtOH            | Polaszek A.   | no  | 5                                           | 7325         | 980        | 5.9                  | 480.7                  | 511                     | 504                                |

| sample code    | source                  | collection year | Family            | genus          | species     | preservative method | identified by | WGA                | q of input DNA (ng) for library preparation | nb raw reads | nb contigs | average contig depth | average length of UCEs | nb UCEs after filtering | nb UCEs in the 25% complete matrix |
|----------------|-------------------------|-----------------|-------------------|----------------|-------------|---------------------|---------------|--------------------|---------------------------------------------|--------------|------------|----------------------|------------------------|-------------------------|------------------------------------|
| JRAS07752_0101 | this study              | -               | Aphelinidae       | Samaniola      | sp.         | 96% EtOH            | Polaszek A.   | no                 | 12.5                                        | 38874        | 1848       | 19.3                 | 538.5                  | 985                     | 935                                |
| JRAS06497_0201 | this study              | 2015            | Pteromalidae      | Scutellista    | cyanea      | 96% EtOH            | Rasplus J.Y.  | no                 | 250                                         | 180452       | 7376       | 22.1                 | 761.6                  | 1153                    | 1040                               |
| JRAS07626_0389 | this study              | 2015            | Pteromalidae      | Scutellista    | obscura     | 96% EtOH            | Rasplus J.Y.  | no                 | 25                                          | 31944        | 1774       | 16.3                 | 604.1                  | 1093                    | 1018                               |
| JRAS07789_0189 | this study              | 2014            | Signiphoridae     | Signiphora     | sp.         | 96% EtOH            | Rasplus J.Y.  | no                 | 10                                          | 26963        | 2907       | 7.4                  | 416.2                  | 693                     | 673                                |
| JRAS07788_0189 | this study              | 2014            | Mymaridae         | Stethynium     | sp.         | 96% EtOH            | Huber J.      | no                 | 10                                          | 61669        | 2076       | 27.9                 | 636.1                  | 284                     | 265                                |
| JRAS07884_0189 | this study              | 2014            | Encyrtidae        | Tachinaephagus | zealandicus | 96% EtOH            | Fusu L.       | no                 | 25                                          | 191956       | 9167       | 18.7                 | 704.2                  | 924                     | 851                                |
| GDEL07010_0101 | this study              | -               | Eulophidae        | Tamarixia      | pubescens   | 96% EtOH            | Delvare G.    | no                 | 10                                          | 31963        | 3399       | 27.0                 | 672.8                  | 758                     | 711                                |
| JRAS07628_0189 | this study              | 2014            | Signiphoridae     | Thysanus       | sp.         | alcohol             | Fusu L.       | no                 | 36.54                                       | 147810       | 11231      | 6.0                  | 589.3                  | 731                     | 699                                |
| TRIC00029_0199 | this study              | 2014            | Trichogrammatidae | Trichogramma   | brassicae   | 96% EtOH            | Rasplus J.Y.  | yes (0.4 ng input) | 250                                         | 340094       | 15682      | 20.0                 | 816.6                  | 425                     | 404                                |
| GENO00028_0101 | Branstetter et al. 2017 | -               | Trichogrammatidae | Trichogramma   | pretiosum   | -                   |               | no                 | NA                                          | NA           | NA         | NA                   | NA                     | NA                      | 626                                |
| TRIC00001_0199 | this study              | -               | Trichogrammatidae | Trichogramma   | sp.         | 96% EtOH            | Rasplus J.Y.  | yes (4 ng input)   | 250                                         | 353266       | 16954      | 18.8                 | 688.5                  | 206                     | 187                                |
| JRAS06864_1401 | this study              | 2016            | Trichogrammatidae | Tumidiclava    | sp.         | 96% EtOH            | Rasplus J.Y.  | no                 | 22.95                                       | 29994        | 1630       | 16.2                 | 618.1                  | 535                     | 521                                |
| LFMM00029_0101 | this study              | 2015            | Aphelinidae       | Umairia        | sp.         | 96% EtOH            | Rasplus J.Y.  | no                 | 12.5                                        | 28887        | 3133       | 4.5                  | 457.4                  | 646                     | 625                                |
| JRAS07858_0189 | this study              | 2014            | Trichogrammatidae | Uscana         | sp.         | 96% EtOH            | Gumovsky A.   | no                 | 25                                          | 126025       | 3420       | 34.8                 | 544.5                  | 186                     | 169                                |
| JRAS03390_0389 | this study              | 2011            | Eulophidae        | Zagrammosoma   | mirum       | 96% EtOH            | Rasplus J.Y.  | no                 | 25                                          | 6729         | 859        | 6.5                  | 407.1                  | 560                     | 534                                |

#### Cited reference

Branstetter MG, Danforth BN, Pitts JP, Faircloth BC, Ward PS, Buffington ML, Gates MW, Kula RR, and Brady SG. 2017. Phylogenomic Insights into the Evolution of Stinging Wasps and the Origins of Ants and Bees. *Current Biology* 27:1019-1025. 10.1016/j.cub.2017.03.027

## Figure S1

### Analytical workflow – Step 1. Pre-processing of the data: from raw reads to raw UCEs

\*The 2749 probes designed by Faircloth et al. (2015) were first assembled into a set of non-overlapping loci using Geneious. This set of reference UCE loci (N=1432) was then used to align sample-specific contigs obtained with CAP3. The reference UCEs are available in additional file 4.

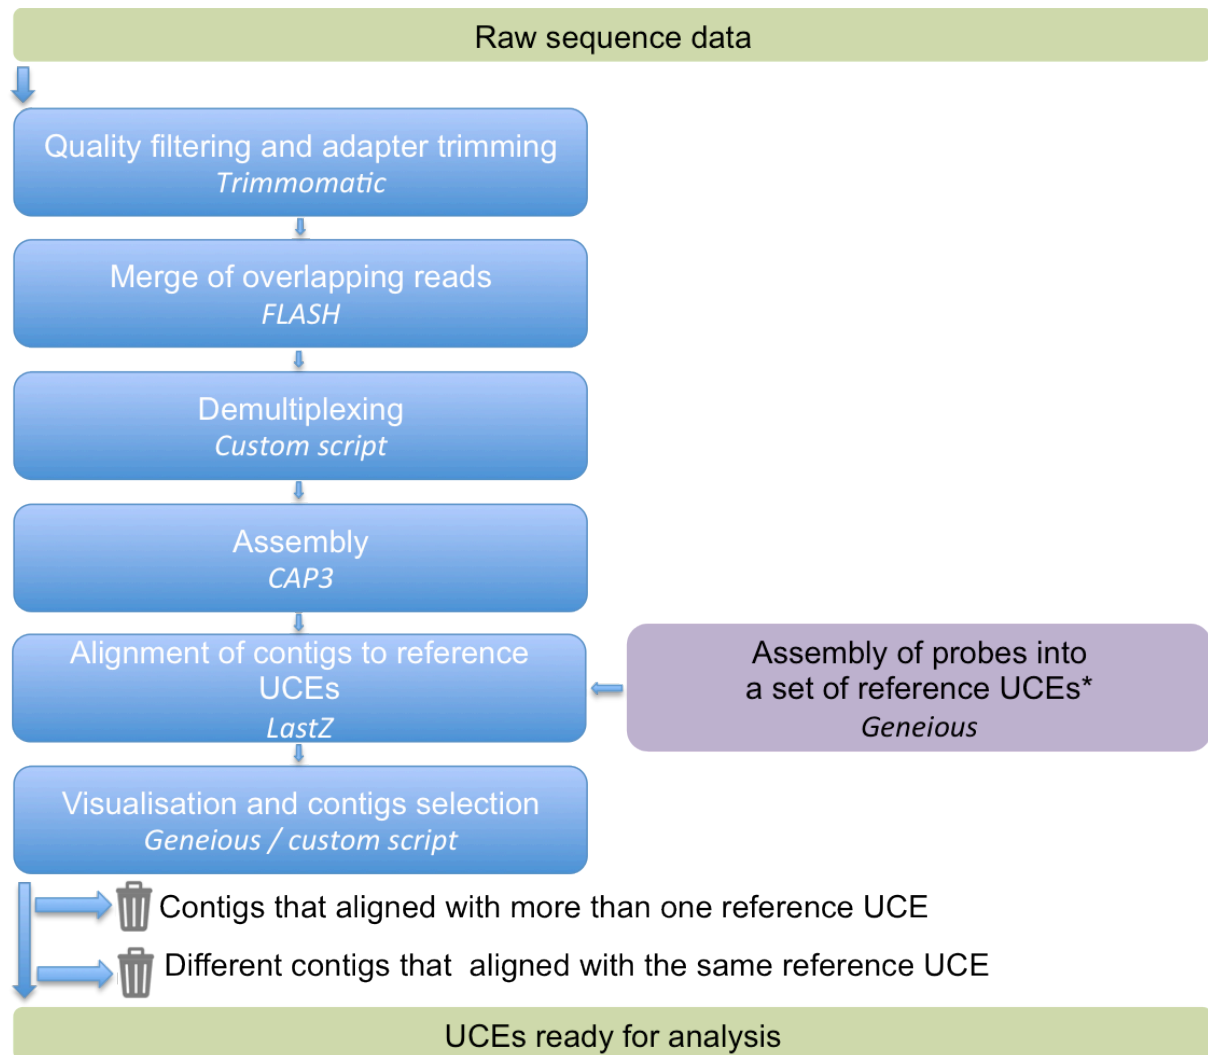

#### Reference cited:

Faircloth, B.C., Branstetter, M.G., White, N.D., S.G., B., 2015. Target enrichment of ultraconserved elements from arthropods provides a genomic perspective on relationships among Hymenoptera. *Molecular Ecology Resources* 15, 489-501.

Figure S2

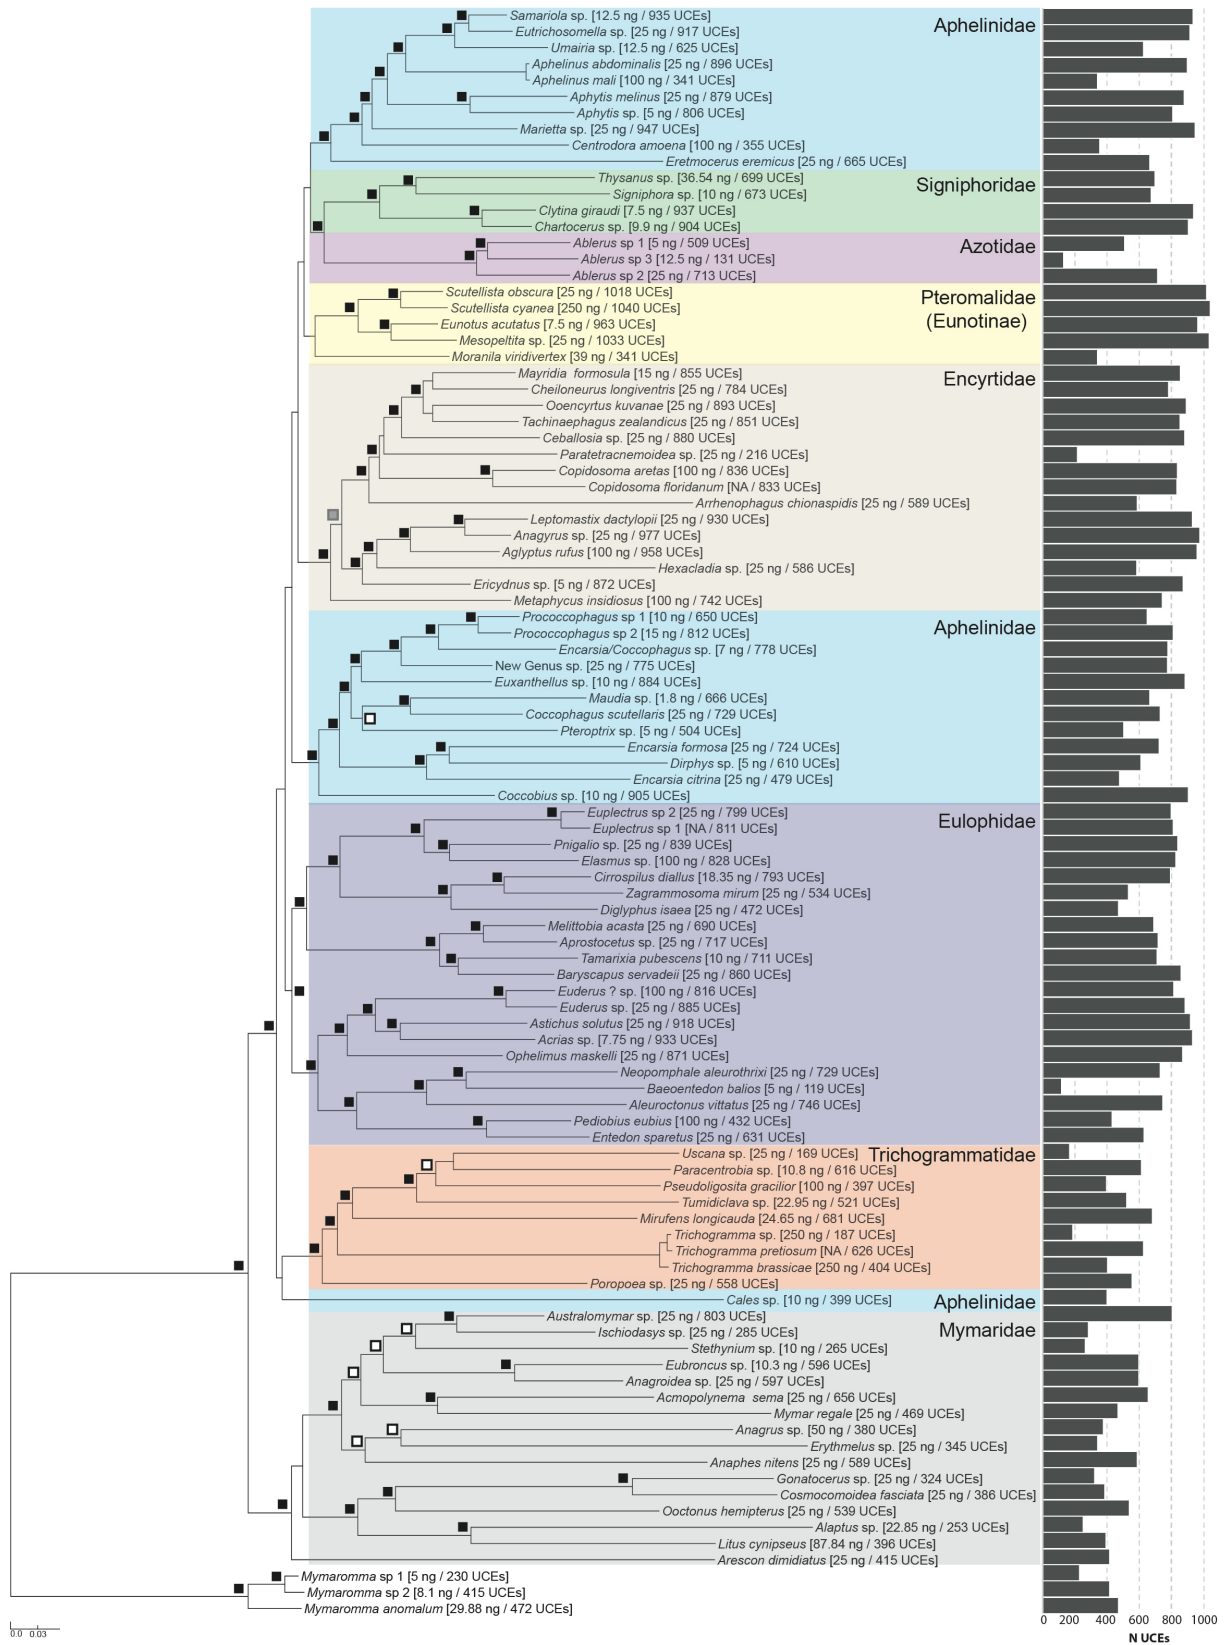

**Figure S3**

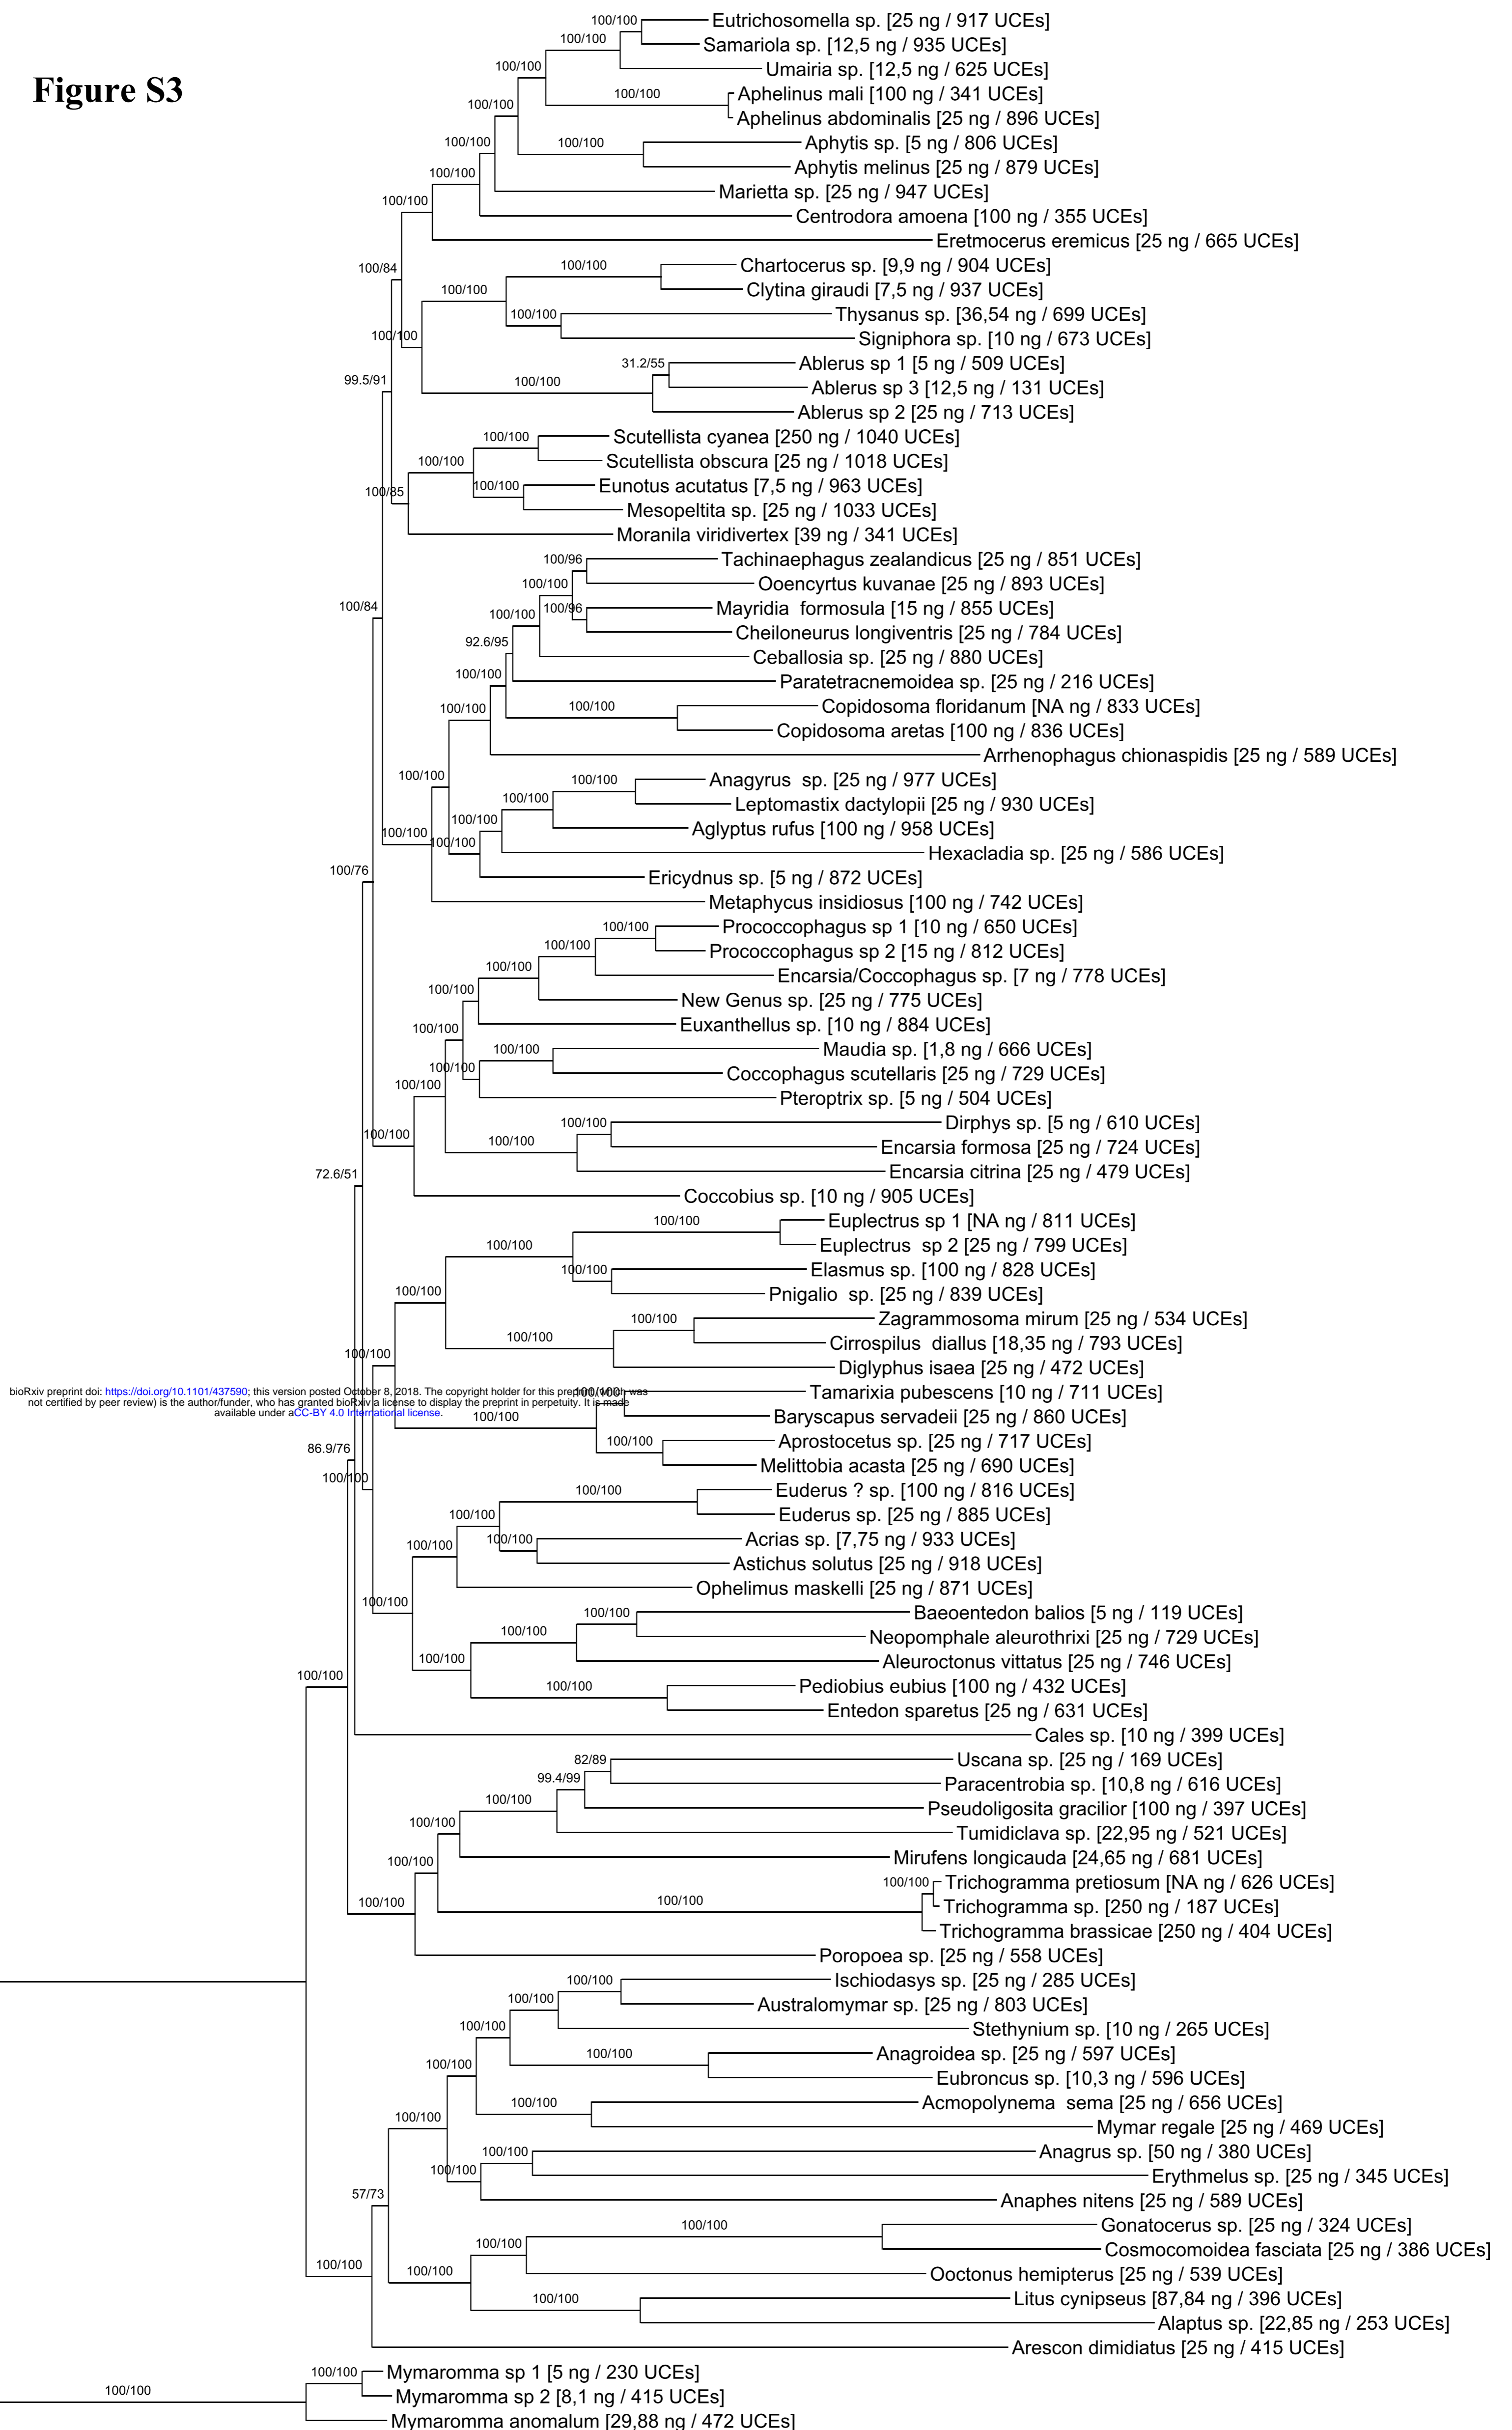



# Figure S4

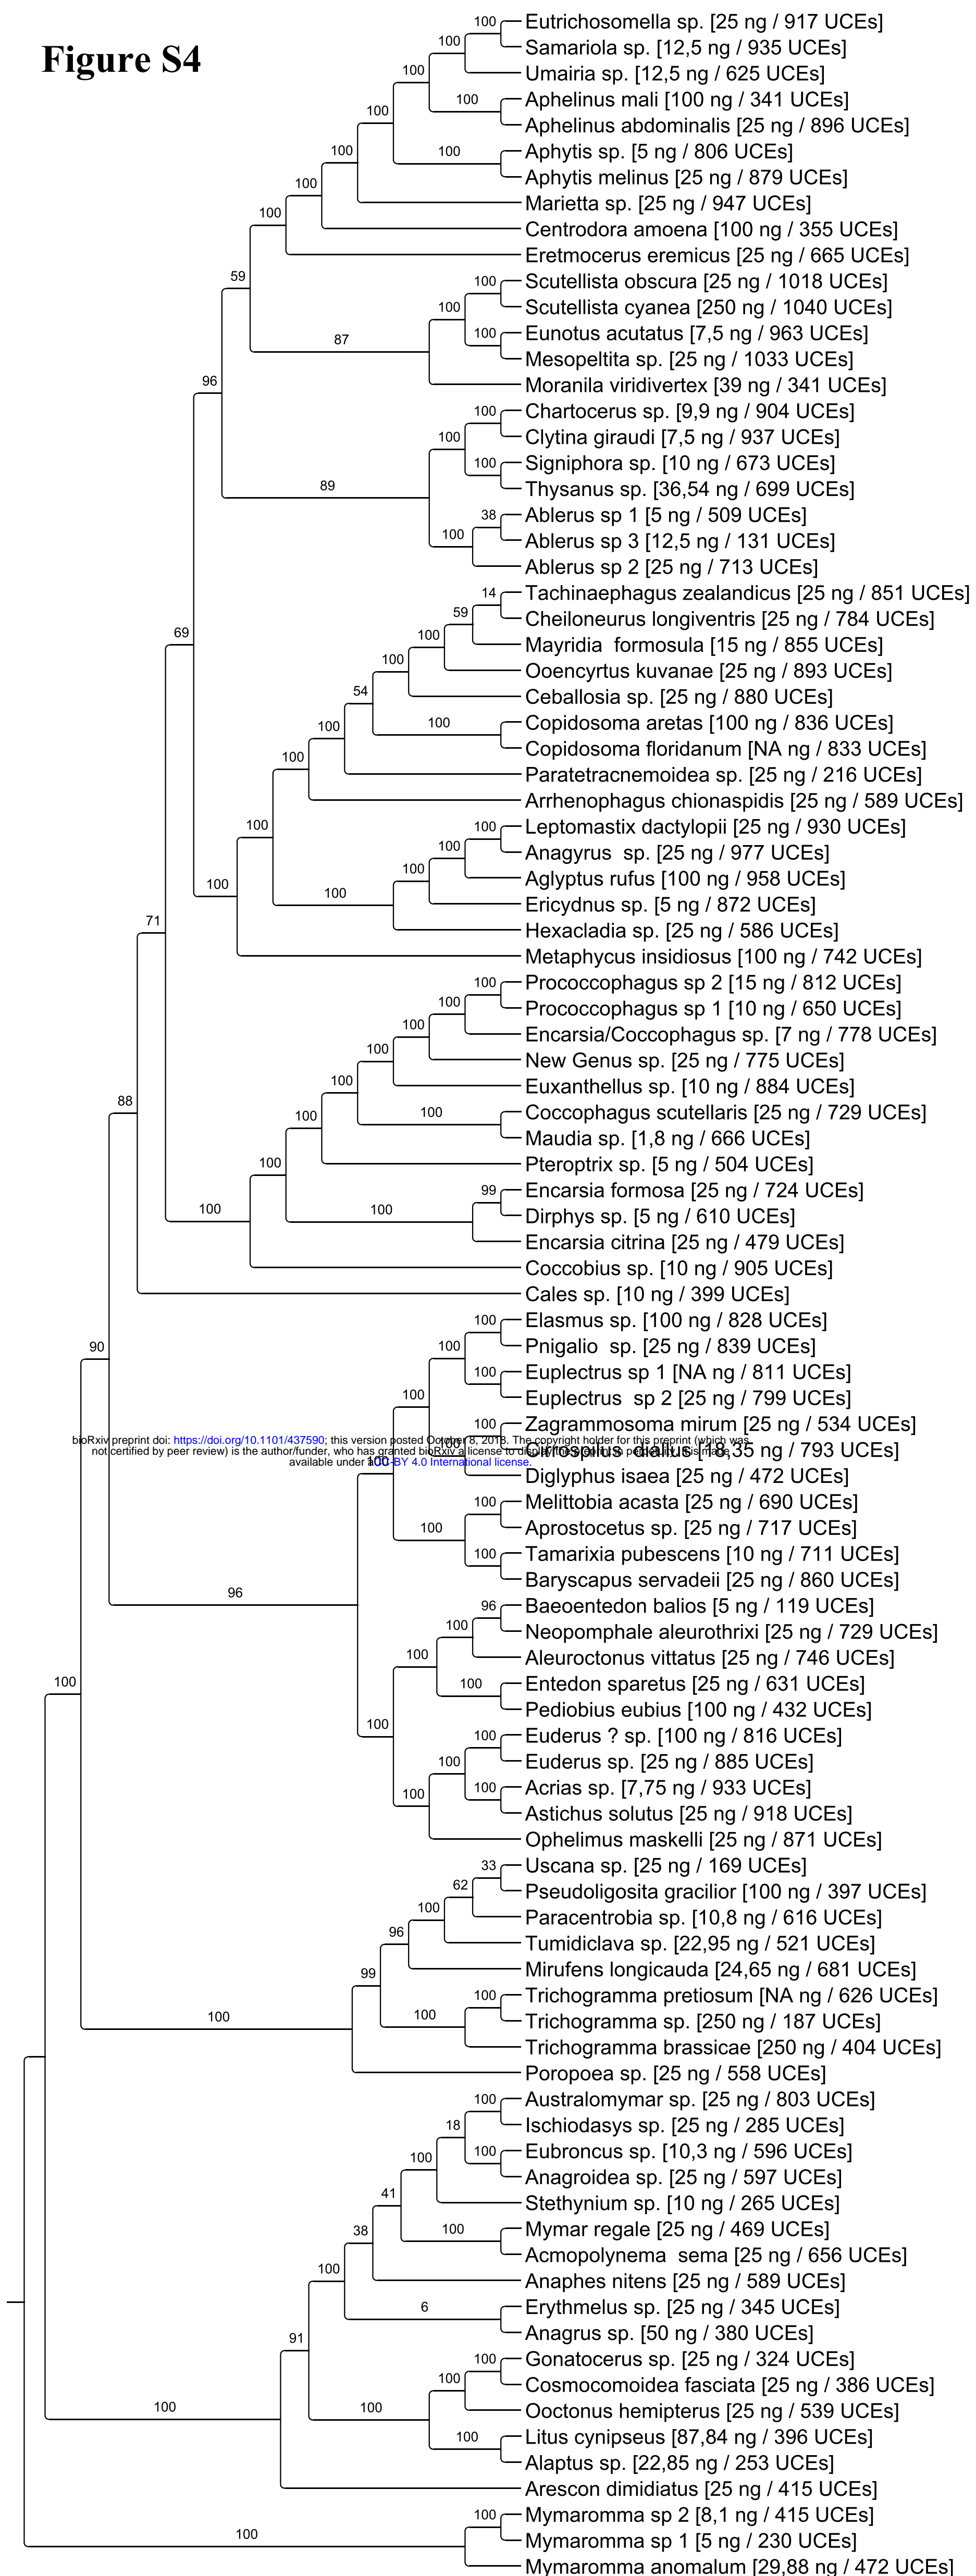

**Figure S5**

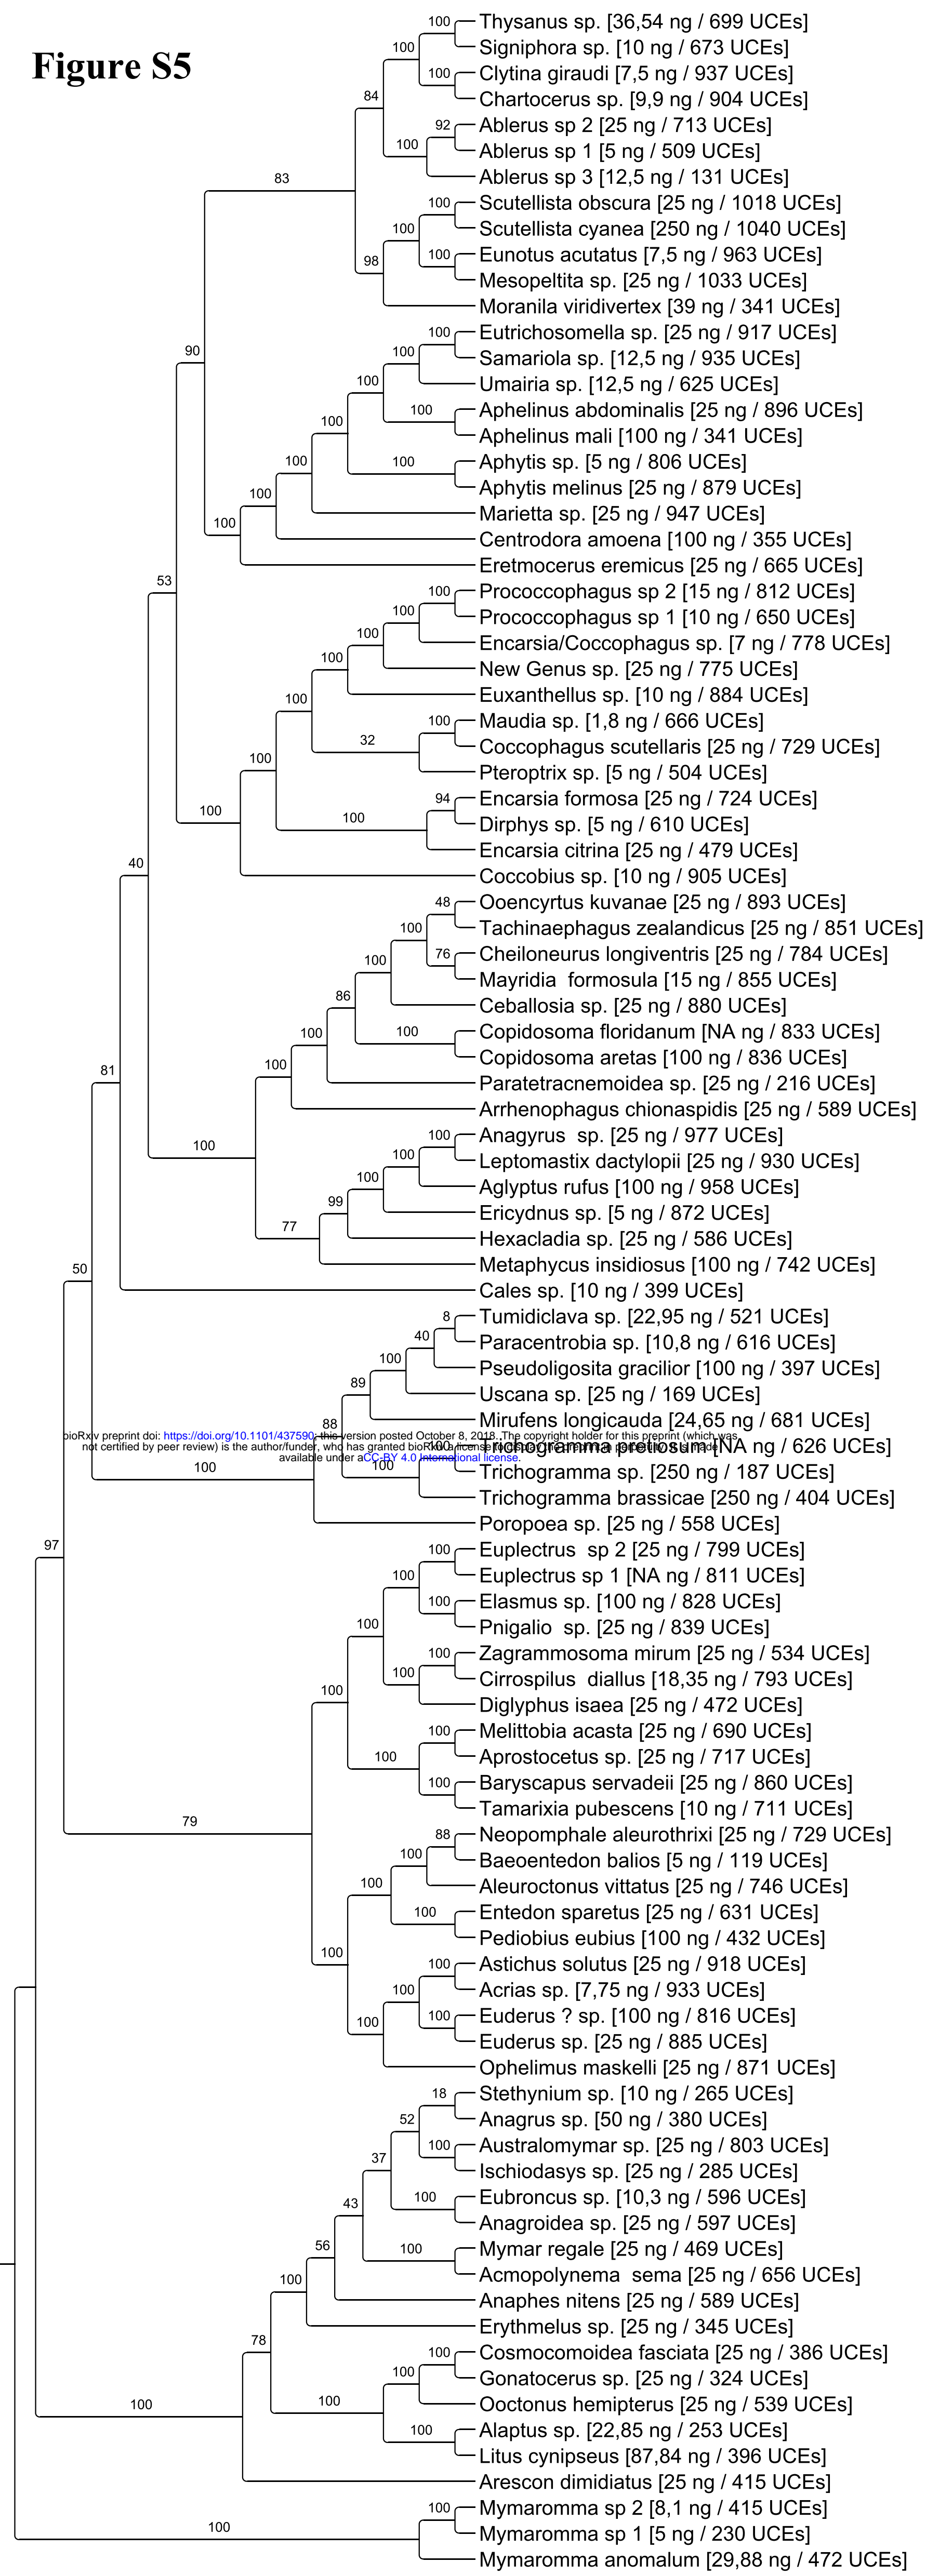

bioRxiv preprint doi: <https://doi.org/10.1101/437590>; this version posted October 8, 2018. The copyright holder for this preprint (which was not certified by peer review) is the author/funder, who has granted bioRxiv a license to display the preprint in perpetuity. It is made available under aCC-BY 4.0 International license.
